# Supplementary material for: Heterologous expression and characterization of Rhodococcus opacus R7 laccase-like multicopper oxidase (LMCO1) enzyme for polyethylene biodegradation
Source: Research Square preprint supplement (doi:10.21203/rs.3.rs-8685015/v1), 2026-02-13
Supplement: Supplementary file 1 [file d83808cede1539199636305c.xlsx]

## Sheet: S1
ID	cds-K2Z90_RS00395	cds-K2Z90_RS00660	cds-K2Z90_RS01455	cds-K2Z90_RS01535	cds-K2Z90_RS01580	cds-K2Z90_RS02765	cds-K2Z90_RS02885	cds-K2Z90_RS03560	cds-K2Z90_RS04365	cds-K2Z90_RS04370	cds-K2Z90_RS04865	cds-K2Z90_RS05925	cds-K2Z90_RS08195	cds-K2Z90_RS08655	cds-K2Z90_RS08755	cds-K2Z90_RS08810	cds-K2Z90_RS09015	cds-K2Z90_RS09100	cds-K2Z90_RS09135	cds-K2Z90_RS09290	cds-K2Z90_RS09525	cds-K2Z90_RS09735	cds-K2Z90_RS10070	cds-K2Z90_RS11085	cds-K2Z90_RS11630	cds-K2Z90_RS12130	cds-K2Z90_RS12190	cds-K2Z90_RS12205	cds-K2Z90_RS12225	cds-K2Z90_RS12265	cds-K2Z90_RS12280	cds-K2Z90_RS12350	cds-K2Z90_RS12355	cds-K2Z90_RS12370	cds-K2Z90_RS12375	cds-K2Z90_RS12380	cds-K2Z90_RS12385	cds-K2Z90_RS12405	cds-K2Z90_RS12980	cds-K2Z90_RS13635	cds-K2Z90_RS14230	cds-K2Z90_RS14235	cds-K2Z90_RS15425	cds-K2Z90_RS15935	cds-K2Z90_RS15955	cds-K2Z90_RS15980	cds-K2Z90_RS17050	cds-K2Z90_RS17165	cds-K2Z90_RS17210
pe	443	130	3	11	121	17	885	137	0	0	26	30	329	0	0	30	0	0	0	0	0	37	0	0	56	11	349	149	81	14	126	72	0	190	9	38	18	15	16	0	37	2	64	0	15	0	0	0	0
pe	554	139	9	8	325	0	688	103	56	0	23	54	405	0	0	49	0	0	0	0	0	130	0	0	2	64	777	147	145	22	272	2	18	261	36	113	3	43	23	0	8	31	44	0	35	0	0	0	0
pe	1869	18	22	44	230	6	5618	135	7	0	28	31	273	0	0	54	0	0	0	0	0	33	0	0	50	23	646	97	78	2	86	22	0	219	0	12	1	2	59	1	0	21	24	0	3	0	0	0	0
mal	538	144	15	27	442	78	205	170	63	0	141	37	947	0	0	36	0	0	0	0	0	140	0	0	146	107	759	307	184	23	432	99	6	453	7	57	6	28	166	22	41	51	167	0	93	0	0	0	0
mal	392	224	20	37	378	54	165	188	45	0	70	52	663	0	0	60	0	0	0	0	0	66	0	0	120	65	383	207	194	8	342	130	13	471	11	87	23	15	101	10	55	67	78	0	55	2	0	0	0
mal	403	76	17	24	304	40	193	91	3	0	38	32	610	0	0	71	0	0	0	0	0	44	0	0	82	81	310	254	88	0	173	102	9	374	9	56	9	65	127	2	63	32	80	0	57	0	0	0	0
[truncated: 5,000 more columns]

## Sheet: S2
ID	cds-K2Z90_RS00395	cds-K2Z90_RS00660	cds-K2Z90_RS01455	cds-K2Z90_RS01535	cds-K2Z90_RS01580	cds-K2Z90_RS02765	cds-K2Z90_RS02885	cds-K2Z90_RS03560	cds-K2Z90_RS04365	cds-K2Z90_RS04865	cds-K2Z90_RS05925	cds-K2Z90_RS08195	cds-K2Z90_RS08810	cds-K2Z90_RS09735	cds-K2Z90_RS11630	cds-K2Z90_RS12130	cds-K2Z90_RS12190	cds-K2Z90_RS12205	cds-K2Z90_RS12225	cds-K2Z90_RS12265	cds-K2Z90_RS12280	cds-K2Z90_RS12350	cds-K2Z90_RS12355	cds-K2Z90_RS12370	cds-K2Z90_RS12375	cds-K2Z90_RS12380	cds-K2Z90_RS12385	cds-K2Z90_RS12405	cds-K2Z90_RS12980	cds-K2Z90_RS13635	cds-K2Z90_RS14230	cds-K2Z90_RS14235	cds-K2Z90_RS15425	cds-K2Z90_RS15955	cds-K2Z90_RS15980	cds-K2Z90_RS17780	cds-K2Z90_RS17790	cds-K2Z90_RS17950	cds-K2Z90_RS19080	cds-K2Z90_RS19205	cds-K2Z90_RS19290	cds-K2Z90_RS19325	cds-K2Z90_RS19560	cds-K2Z90_RS19960	cds-K2Z90_RS20165	cds-K2Z90_RS20505	cds-K2Z90_RS21190	cds-K2Z90_RS21630	cds-K2Z90_RS21745
pe	443	130	3	11	121	17	885	137	0	26	30	329	30	37	56	11	349	149	81	14	126	72	0	190	9	38	18	15	16	0	37	2	64	15	0	23	13	117	2	1	15	70	0	0	18	0	0	46	0
pe	554	139	9	8	325	0	688	103	56	23	54	405	49	130	2	64	777	147	145	22	272	2	18	261	36	113	3	43	23	0	8	31	44	35	0	47	43	87	10	25	38	145	0	0	51	0	0	37	0
pe	1869	18	22	44	230	6	5618	135	7	28	31	273	54	33	50	23	646	97	78	2	86	22	0	219	0	12	1	2	59	1	0	21	24	3	0	3	1	71	1	7	1	36	0	0	0	0	0	29	1
mal	538	144	15	27	442	78	205	170	63	141	37	947	36	140	146	107	759	307	184	23	432	99	6	453	7	57	6	28	166	22	41	51	167	93	0	13	8	255	24	11	70	336	0	0	60	1	0	54	0
mal	392	224	20	37	378	54	165	188	45	70	52	663	60	66	120	65	383	207	194	8	342	130	13	471	11	87	23	15	101	10	55	67	78	55	2	35	21	154	45	18	80	119	0	0	26	0	1	41	0
mal	403	76	17	24	304	40	193	91	3	38	32	610	71	44	82	81	310	254	88	0	173	102	9	374	9	56	9	65	127	2	63	32	80	57	0	14	7	114	17	5	30	159	1	1	44	0	0	18	0
[truncated: 5,000 more columns]

## Sheet: S3
information gain			information gain ratio			correlation			gini index			Uncertainty			SVM			PCA
cds-K2Z90_RS02765	1		cds-K2Z90_RS02765	1		cds-WP_264297262.1	1		cds-K2Z90_RS02765	1		cds-WP_005239443.1	1		cds-WP_005252299.1	1		cds-WP_025432202.1	1
cds-K2Z90_RS02885	1		cds-K2Z90_RS02885	1		cds-WP_005239567.1	0.997875		cds-K2Z90_RS02885	1		cds-WP_005239567.1	1		cds-WP_005247817.1	0.980736		cds-WP_005244442.1	0.99961
cds-K2Z90_RS04865	1		cds-K2Z90_RS04865	1		cds-WP_016883983.1	0.996815		cds-K2Z90_RS04865	1		cds-WP_264297262.1	1		cds-WP_025431703.1	0.974489		cds-WP_005248784.1	0.999339
cds-K2Z90_RS08195	1		cds-K2Z90_RS08195	1		cds-WP_005239443.1	0.99647		cds-K2Z90_RS08195	1		cds-K2Z90_RS23990	0.81329		cds-WP_080578276.1	0.96893		cds-WP_005241030.1	0.999162
cds-K2Z90_RS11630	1		cds-K2Z90_RS11630	1		cds-WP_005251381.1	0.995984		cds-K2Z90_RS11630	1		cds-WP_005238947.1	0.81329		cds-WP_009479537.1	0.968882		cds-WP_005251715.1	0.998858
cds-K2Z90_RS12130	1		cds-K2Z90_RS12130	1		cds-WP_005239956.1	0.995316		cds-K2Z90_RS12130	1		cds-WP_005239439.1	0.81329		cds-WP_005247432.1	0.964207		cds-WP_025433274.1	0.99872
cds-K2Z90_RS12205	1		cds-K2Z90_RS12205	1		cds-WP_005246620.1	0.994094		cds-K2Z90_RS12205	1		cds-WP_005239500.1	0.81329		cds-WP_005248975.1	0.959601		cds-WP_025433019.1	0.998693
cds-K2Z90_RS12350	1		cds-K2Z90_RS12350	1		cds-WP_005239499.1	0.993269		cds-K2Z90_RS12350	1		cds-WP_005239638.1	0.81329		cds-WP_005260402.1	0.958316		cds-WP_005247772.1	0.99835
cds-K2Z90_RS12370	1		cds-K2Z90_RS12370	1		cds-WP_005248815.1	0.993221		cds-K2Z90_RS12370	1		cds-WP_005239956.1	0.81329		cds-WP_005244372.1	0.958295		cds-WP_025432818.1	0.998185
cds-K2Z90_RS12980	1		cds-K2Z90_RS12980	1		cds-WP_005239439.1	0.991023		cds-K2Z90_RS12980	1		cds-WP_005240396.1	0.81329		cds-WP_005246385.1	0.952034		cds-WP_025431766.1	0.998049
cds-K2Z90_RS13635	1		cds-K2Z90_RS13635	1		cds-WP_025432958.1	0.990776		cds-K2Z90_RS13635	1		cds-WP_005240725.1	0.81329		cds-WP_005249868.1	0.951603		cds-WP_005244212.1	0.998046
cds-K2Z90_RS14230	1		cds-K2Z90_RS14230	1		cds-WP_005242362.1	0.990496		cds-K2Z90_RS14230	1		cds-WP_005241026.1	0.81329		cds-WP_025432612.1	0.95005		cds-WP_025432546.1	0.997706
cds-K2Z90_RS14235	1		cds-K2Z90_RS14235	1		cds-WP_005242937.1	0.990352		cds-K2Z90_RS14235	1		cds-WP_005241711.1	0.81329		cds-WP_025431630.1	0.949968		cds-WP_005247909.1	0.997665
cds-K2Z90_RS15425	1		cds-K2Z90_RS15425	1		cds-WP_025432215.1	0.990135		cds-K2Z90_RS15425	1		cds-WP_005241862.1	0.81329		cds-WP_085990776.1	0.944908		cds-WP_005248830.1	0.997603
cds-K2Z90_RS15955	1		cds-K2Z90_RS15955	1		cds-WP_007295767.1	0.98939		cds-K2Z90_RS15955	1		cds-WP_005242133.1	0.81329		cds-WP_025431550.1	0.943901		cds-WP_226955772.1	0.997391
cds-K2Z90_RS19080	1		cds-K2Z90_RS19080	1		cds-WP_005243853.1	0.98804		cds-K2Z90_RS19080	1		cds-WP_005242362.1	0.81329		cds-WP_005252794.1	0.943376		cds-WP_005248832.1	0.997312
cds-K2Z90_RS22950	1		cds-K2Z90_RS22950	1		cds-WP_005242359.1	0.98777		cds-K2Z90_RS22950	1		cds-WP_005242363.1	0.81329		cds-WP_037181441.1	0.941844		cds-WP_025431918.1	0.997104
cds-K2Z90_RS23990	1		cds-K2Z90_RS23990	1		cds-WP_005242367.1	0.987292		cds-K2Z90_RS23990	1		cds-WP_005242373.1	0.81329		cds-WP_025433520.1	0.94074		cds-WP_025432308.1	0.997044
cds-K2Z90_RS27905	1		cds-K2Z90_RS27905	1		cds-WP_005239636.1	0.986027		cds-K2Z90_RS27905	1		cds-WP_005242408.1	0.81329		cds-WP_005248358.1	0.939391		cds-WP_005242964.1	0.996857
cds-K2Z90_RS28060	1		cds-K2Z90_RS28060	1		cds-WP_005252048.1	0.985528		cds-K2Z90_RS28060	1		cds-WP_005243171.1	0.81329		cds-WP_226955547.1	0.93642		cds-WP_005250621.1	0.996778
cds-K2Z90_RS31845	1		cds-K2Z90_RS31845	1		cds-WP_005242124.1	0.985207		cds-K2Z90_RS31845	1		cds-WP_005243204.1	0.81329		cds-WP_025432449.1	0.935432		cds-WP_005252241.1	0.996615
cds-K2Z90_RS41800	1		cds-K2Z90_RS41800	1		cds-WP_025431633.1	0.985042		cds-K2Z90_RS41800	1		cds-WP_005243492.1	0.81329		cds-WP_005252928.1	0.932688		cds-WP_025433166.1	0.996505
cds-WP_003402602.1	1		cds-WP_003402602.1	1		cds-WP_005244873.1	0.983621		cds-WP_003402602.1	1		cds-WP_005243633.1	0.81329		cds-WP_005243642.1	0.931986		cds-WP_005252084.1	0.996437
cds-WP_003418601.1	1		cds-WP_003418601.1	1		cds-WP_005252734.1	0.982521		cds-WP_003418601.1	1		cds-WP_005243718.1	0.81329		cds-WP_005252018.1	0.928802		cds-WP_005243071.1	0.996352
cds-WP_003936084.1	1		cds-WP_003936084.1	1		cds-WP_187300183.1	0.982483		cds-WP_003936084.1	1		cds-WP_005243853.1	0.81329		cds-WP_005243112.1	0.928135		cds-WP_005251561.1	0.996292
cds-WP_003938068.1	1		cds-WP_003938068.1	1		cds-WP_005246128.1	0.982467		cds-WP_003938068.1	1		cds-WP_005244451.1	0.81329		cds-WP_005251754.1	0.926294		cds-WP_025433252.1	0.995826
cds-WP_003940763.1	1		cds-WP_003940763.1	1		cds-WP_005250036.1	0.982186		cds-WP_003940763.1	1		cds-WP_005244674.1	0.81329		cds-WP_025433557.1	0.925027		cds-WP_005247697.1	0.995633
cds-WP_003940820.1	1		cds-WP_003940820.1	1		cds-WP_005248111.1	0.98178		cds-WP_003940820.1	1		cds-WP_005244713.1	0.81329		cds-WP_005244945.1	0.924651		cds-WP_005240587.1	0.995379
cds-WP_005237760.1	1		cds-WP_005237760.1	1		cds-WP_005239500.1	0.981744		cds-WP_005237760.1	1		cds-WP_005244873.1	0.81329		cds-WP_005248984.1	0.922258		cds-WP_005252432.1	0.994945
cds-WP_005237765.1	1		cds-WP_005237765.1	1		cds-WP_005251302.1	0.981499		cds-WP_005237765.1	1		cds-WP_005246086.1	0.81329		cds-WP_025432213.1	0.921555		cds-WP_005252012.1	0.994941
cds-WP_005237770.1	1		cds-WP_005237770.1	1		cds-WP_005251928.1	0.981385		cds-WP_005237770.1	1		cds-WP_005246397.1	0.81329		cds-WP_005250068.1	0.920302		cds-WP_005244576.1	0.99489
cds-WP_005237778.1	1		cds-WP_005237778.1	1		cds-WP_025431705.1	0.981105		cds-WP_005237778.1	1		cds-WP_005246620.1	0.81329		cds-WP_164709609.1	0.918312		cds-WP_025432254.1	0.994889
cds-WP_005237780.1	1		cds-WP_005237780.1	1		cds-WP_005240363.1	0.981087		cds-WP_005237780.1	1		cds-WP_005248709.1	0.81329		cds-WP_005252961.1	0.917559		cds-WP_005250480.1	0.994803
cds-WP_005237782.1	1		cds-WP_005237782.1	1		cds-WP_005251734.1	0.980865		cds-WP_005237782.1	1		cds-WP_005248724.1	0.81329		cds-WP_005248181.1	0.915002		cds-WP_005248917.1	0.994802
cds-WP_005237785.1	1		cds-WP_005237785.1	1		cds-WP_037179832.1	0.980581		cds-WP_005237785.1	1		cds-WP_005248815.1	0.81329		cds-WP_005240834.1	0.914945		cds-WP_005251008.1	0.994658
cds-WP_005237789.1	1		cds-WP_005237789.1	1		cds-WP_003940820.1	0.980379		cds-WP_005237789.1	1		cds-WP_005248937.1	0.81329		cds-WP_005244528.1	0.912645		cds-WP_005247482.1	0.994627
cds-WP_005237791.1	1		cds-WP_005237791.1	1		cds-WP_025431942.1	0.980146		cds-WP_005237791.1	1		cds-WP_005249137.1	0.81329		cds-WP_005248255.1	0.911664		cds-WP_005250389.1	0.994523
cds-WP_005237792.1	1		cds-WP_005237792.1	1		cds-WP_005238506.1	0.979856		cds-WP_005237792.1	1		cds-WP_005249167.1	0.81329		cds-WP_005238747.1	0.911554		cds-WP_005240726.1	0.994355
cds-WP_005237808.1	1		cds-WP_005237808.1	1		cds-WP_005240734.1	0.979512		cds-WP_005237808.1	1		cds-WP_005249241.1	0.81329		cds-WP_005248970.1	0.910626		cds-WP_005252293.1	0.994161
cds-WP_005237826.1	1		cds-WP_005237826.1	1		cds-WP_005246086.1	0.979428		cds-WP_005237826.1	1		cds-WP_005249677.1	0.81329		cds-WP_005243204.1	0.910428		cds-WP_005249605.1	0.99412
cds-WP_005237828.1	1		cds-WP_005237828.1	1		cds-WP_005244674.1	0.978453		cds-WP_005237828.1	1		cds-WP_005250068.1	0.81329		cds-WP_005242411.1	0.909068		cds-WP_005239598.1	0.994047
cds-WP_005237830.1	1		cds-WP_005237830.1	1		cds-WP_025432217.1	0.978351		cds-WP_005237830.1	1		cds-WP_005250550.1	0.81329		cds-WP_005239640.1	0.908565		cds-WP_005248852.1	0.994015
cds-WP_005237839.1	1		cds-WP_005237839.1	1		cds-WP_005247842.1	0.97834		cds-WP_005237839.1	1		cds-WP_005250797.1	0.81329		cds-WP_005239513.1	0.907322		cds-WP_005248947.1	0.993983
cds-WP_005237840.1	1		cds-WP_005237840.1	1		cds-WP_005249217.1	0.978121		cds-WP_005237840.1	1		cds-WP_005250910.1	0.81329		cds-WP_005238665.1	0.907213		cds-WP_005244223.1	0.9938
cds-WP_005237844.1	1		cds-WP_005237844.1	1		cds-WP_005238935.1	0.978103		cds-WP_005237844.1	1		cds-WP_005251189.1	0.81329		cds-WP_061041700.1	0.906629		cds-WP_005241841.1	0.993724
cds-WP_005237854.1	1		cds-WP_005237854.1	1		cds-WP_005243684.1	0.977855		cds-WP_005237854.1	1		cds-WP_005251379.1	0.81329		cds-WP_005244942.1	0.905485		cds-WP_005250790.1	0.993628
cds-WP_005237856.1	1		cds-WP_005237856.1	1		cds-WP_005240868.1	0.977831		cds-WP_005237856.1	1		cds-WP_005251381.1	0.81329		cds-WP_005256369.1	0.904656		cds-WP_005249214.1	0.993611
cds-WP_005237864.1	1		cds-WP_005237864.1	1		cds-WP_025433243.1	0.977261		cds-WP_005237864.1	1		cds-WP_005251525.1	0.81329		cds-WP_025432300.1	0.903746		cds-WP_005239980.1	0.993484
cds-WP_005237867.1	1		cds-WP_005237867.1	1		cds-WP_005573048.1	0.976861		cds-WP_005237867.1	1		cds-WP_005251530.1	0.81329		cds-WP_005248831.1	0.902974		cds-WP_005249674.1	0.993385
cds-WP_005237868.1	1		cds-WP_005237868.1	1		cds-WP_005240853.1	0.976641		cds-WP_005237868.1	1		cds-WP_005251571.1	0.81329		cds-WP_005248976.1	0.902966		cds-WP_005239357.1	0.993331
cds-WP_005237870.1	1		cds-WP_005237870.1	1		cds-WP_005252443.1	0.976567		cds-WP_005237870.1	1		cds-WP_005251814.1	0.81329		cds-WP_025432524.1	0.902936		cds-WP_005244444.1	0.99332
cds-WP_005237871.1	1		cds-WP_005237871.1	1		cds-WP_005248772.1	0.976463		cds-WP_005237871.1	1		cds-WP_005252018.1	0.81329		cds-WP_005238136.1	0.902619		cds-WP_226955719.1	0.993273
cds-WP_005237901.1	1		cds-WP_005237901.1	1		cds-WP_005242363.1	0.976321		cds-WP_005237901.1	1		cds-WP_005252344.1	0.81329		cds-WP_005252593.1	0.901607		cds-WP_005563339.1	0.993242
cds-WP_005237902.1	1		cds-WP_005237902.1	1		cds-WP_005246678.1	0.975807		cds-WP_005237902.1	1		cds-WP_005252374.1	0.81329		cds-WP_005249268.1	0.897741		cds-WP_005238652.1	0.993222
cds-WP_005237921.1	1		cds-WP_005237921.1	1		cds-WP_005248464.1	0.975712		cds-WP_005237921.1	1		cds-WP_005252404.1	0.81329		cds-WP_005248972.1	0.897673		cds-WP_025433174.1	0.993164
cds-WP_005237923.1	1		cds-WP_005237923.1	1		cds-WP_005241270.1	0.974355		cds-WP_005237923.1	1		cds-WP_005252536.1	0.81329		cds-WP_005247842.1	0.895265		cds-WP_005247591.1	0.993144
cds-WP_005237924.1	1		cds-WP_005237924.1	1		cds-WP_025432163.1	0.974048		cds-WP_005237924.1	1		cds-WP_005252734.1	0.81329		cds-WP_005243171.1	0.893184		cds-WP_025433225.1	0.99314
cds-WP_005237930.1	1		cds-WP_005237930.1	1		cds-WP_005252000.1	0.973877		cds-WP_005237930.1	1		cds-WP_005252847.1	0.81329		cds-WP_005243169.1	0.892555		cds-WP_005240141.1	0.99308
cds-WP_005237933.1	1		cds-WP_005237933.1	1		cds-WP_005242371.1	0.973509		cds-WP_005237933.1	1		cds-WP_005252949.1	0.81329		cds-WP_005249127.1	0.892309		cds-WP_005240735.1	0.993061
cds-WP_005237940.1	1		cds-WP_005237940.1	1		cds-WP_005249180.1	0.973444		cds-WP_005237940.1	1		cds-WP_005252956.1	0.81329		cds-WP_025432607.1	0.892216		cds-WP_226955686.1	0.992992
cds-WP_005237942.1	1		cds-WP_005237942.1	1		cds-WP_005237778.1	0.973143		cds-WP_005237942.1	1		cds-WP_005252958.1	0.81329		cds-WP_037181763.1	0.891116		cds-WP_005247989.1	0.992916
cds-WP_005237946.1	1		cds-WP_005237946.1	1		cds-WP_025433054.1	0.973141		cds-WP_005237946.1	1		cds-WP_005573048.1	0.81329		cds-WP_005239482.1	0.89109		cds-WP_005244889.1	0.992888
cds-WP_005237948.1	1		cds-WP_005237948.1	1		cds-WP_005238409.1	0.973003		cds-WP_005237948.1	1		cds-WP_007295767.1	0.81329		cds-WP_005239662.1	0.888411		cds-WP_005248717.1	0.992863
cds-WP_005237953.1	1		cds-WP_005237953.1	1		cds-WP_005239503.1	0.97238		cds-WP_005237953.1	1		cds-WP_016883983.1	0.81329		cds-WP_025431618.1	0.886978		cds-WP_025431653.1	0.992762
cds-WP_005237955.1	1		cds-WP_005237955.1	1		cds-WP_005251300.1	0.972191		cds-WP_005237955.1	1		cds-WP_025431612.1	0.81329		cds-WP_005247506.1	0.886967		cds-WP_005242940.1	0.992675
cds-WP_005237960.1	1		cds-WP_005237960.1	1		cds-WP_005247575.1	0.971859		cds-WP_005237960.1	1		cds-WP_025431914.1	0.81329		cds-WP_005244612.1	0.884419		cds-WP_005241014.1	0.992617
cds-WP_005237974.1	1		cds-WP_005237974.1	1		cds-WP_005247561.1	0.971534		cds-WP_005237974.1	1		cds-WP_025432173.1	0.81329		cds-WP_005254663.1	0.884264		cds-WP_005248495.1	0.992594
cds-WP_005237978.1	1		cds-WP_005237978.1	1		cds-WP_025432111.1	0.971103		cds-WP_005237978.1	1		cds-WP_025432215.1	0.81329		cds-WP_025433631.1	0.883604		cds-WP_025433222.1	0.992547
cds-WP_005238002.1	1		cds-WP_005238002.1	1		cds-WP_005248818.1	0.971005		cds-WP_005238002.1	1		cds-WP_025432542.1	0.81329		cds-WP_005242971.1	0.883487		cds-WP_005252290.1	0.992535
cds-WP_005238055.1	1		cds-WP_005238055.1	1		cds-WP_025432979.1	0.970984		cds-WP_005238055.1	1		cds-WP_025432621.1	0.81329		cds-WP_005251984.1	0.882914		cds-WP_025431956.1	0.992516
cds-WP_005238074.1	1		cds-WP_005238074.1	1		cds-WP_005239304.1	0.969504		cds-WP_005238074.1	1		cds-WP_025432958.1	0.81329		cds-WP_005246351.1	0.881554		cds-WP_005239839.1	0.992504
cds-WP_005238076.1	1		cds-WP_005238076.1	1		cds-WP_005252901.1	0.96941		cds-WP_005238076.1	1		cds-WP_025432967.1	0.81329		cds-WP_037180873.1	0.880048		cds-WP_005237978.1	0.992359
cds-WP_005238097.1	1		cds-WP_005238097.1	1		cds-WP_025431674.1	0.969074		cds-WP_005238097.1	1		cds-WP_025433318.1	0.81329		cds-K2Z90_RS26195	0.879856		cds-WP_005239504.1	0.992332
cds-WP_005238098.1	1		cds-WP_005238098.1	1		cds-WP_005242971.1	0.969071		cds-WP_005238098.1	1		cds-WP_037179308.1	0.81329		cds-WP_005244816.1-3	0.879856		cds-WP_005248588.1	0.992307
cds-WP_005238099.1	1		cds-WP_005238099.1	1		cds-WP_005240833.1	0.968962		cds-WP_005238099.1	1		cds-WP_037179849.1	0.81329		cds-WP_005248519.1	0.879856		cds-WP_005243986.1	0.992246
cds-WP_005238107.1	1		cds-WP_005238107.1	1		cds-WP_005245309.1	0.968256		cds-WP_005238107.1	1		cds-WP_037182869.1	0.81329		cds-WP_005248895.1	0.879856		cds-WP_005241766.1	0.992243
cds-WP_005238108.1	1		cds-WP_005238108.1	1		cds-WP_025432165.1	0.968053		cds-WP_005238108.1	1		cds-WP_080578158.1	0.81329		cds-WP_005250468.1	0.879856		cds-K2Z90_RS28060	0.99221
cds-WP_005238125.1	1		cds-WP_005238125.1	1		cds-WP_005246185.1	0.967584		cds-WP_005238125.1	1		cds-WP_226955523.1	0.81329		cds-WP_005250894.1	0.879856		cds-WP_005238834.1	0.992142
cds-WP_005238131.1	1		cds-WP_005238131.1	1		cds-WP_005240388.1	0.967513		cds-WP_005238131.1	1		cds-WP_226955700.1	0.81329		cds-WP_025432727.1	0.879856		cds-WP_005249651.1	0.992099
cds-WP_005238133.1	1		cds-WP_005238133.1	1		cds-WP_025432524.1	0.967441		cds-WP_005238133.1	1		cds-K2Z90_RS04865	0.716209		cds-WP_005251135.1	0.876949		cds-WP_005239048.1	0.992041
cds-WP_005238136.1	1		cds-WP_005238136.1	1		cds-WP_005251754.1	0.967341		cds-WP_005238136.1	1		cds-K2Z90_RS31845	0.716209		cds-WP_005249272.1	0.876641		cds-WP_264297251.1	0.992033
cds-WP_005238264.1	1		cds-WP_005238264.1	1		cds-WP_005242382.1	0.967062		cds-WP_005238264.1	1		cds-WP_003418601.1	0.716209		cds-WP_025432729.1	0.876641		cds-WP_005251799.1	0.992015
cds-WP_005238269.1	1		cds-WP_005238269.1	1		cds-WP_005239662.1	0.966825		cds-WP_005238269.1	1		cds-WP_003940820.1	0.716209		cds-WP_005237839.1	0.873688		cds-WP_005242946.1	0.991886
cds-WP_005238286.1	1		cds-WP_005238286.1	1		cds-WP_005239563.1	0.96672		cds-WP_005238286.1	1		cds-WP_005237770.1	0.716209		cds-WP_005239636.1	0.873195		cds-WP_025433014.1	0.991856
cds-WP_005238294.1	1		cds-WP_005238294.1	1		cds-WP_005246379.1	0.966202		cds-WP_005238294.1	1		cds-WP_005237955.1	0.716209		cds-WP_005250839.1	0.872826		cds-WP_005243769.1	0.991693
cds-WP_005238296.1	1		cds-WP_005238296.1	1		cds-WP_005243605.1	0.966169		cds-WP_005238296.1	1		cds-WP_005238108.1	0.716209		cds-WP_005243677.1	0.87272		cds-WP_005252752.1	0.991649
cds-WP_005238317.1	1		cds-WP_005238317.1	1		cds-WP_005240572.1	0.965868		cds-WP_005238317.1	1		cds-WP_005238470.1	0.716209		cds-WP_005263664.1	0.867637		cds-WP_005248829.1	0.991584
cds-WP_005238331.1	1		cds-WP_005238331.1	1		cds-WP_005250030.1	0.965835		cds-WP_005238331.1	1		cds-WP_005238543.1	0.716209		cds-WP_037179832.1	0.866449		cds-WP_005252316.1	0.991548
cds-WP_005238339.1	1		cds-WP_005238339.1	1		cds-WP_005252872.1	0.965321		cds-WP_005238339.1	1		cds-WP_005238592.1	0.716209		cds-WP_037181684.1	0.865257		cds-WP_005248237.1	0.991525
cds-WP_005238363.1	1		cds-WP_005238363.1	1		cds-WP_005250930.1	0.964543		cds-WP_005238363.1	1		cds-WP_005238721.1	0.716209		cds-WP_005246128.1	0.863729		cds-WP_025432172.1	0.991447
cds-WP_005238367.1	1		cds-WP_005238367.1	1		cds-WP_005238775.1	0.964391		cds-WP_005238367.1	1		cds-WP_005238775.1	0.716209		cds-K2Z90_RS41800	0.86295		cds-WP_025431921.1	0.991437
cds-WP_005238388.1	1		cds-WP_005238388.1	1		cds-WP_005240914.1	0.96381		cds-WP_005238388.1	1		cds-WP_005238780.1	0.716209		cds-WP_005252959.1	0.861428		cds-WP_005239354.1	0.991352
cds-WP_005238398.1	1		cds-WP_005238398.1	1		cds-WP_005238566.1	0.963099		cds-WP_005238398.1	1		cds-WP_005238781.1	0.716209		cds-WP_005239845.1	0.861288		cds-WP_005244847.1	0.991349
cds-WP_005238409.1	1		cds-WP_005238409.1	1		cds-WP_025432597.1	0.963053		cds-WP_005238409.1	1		cds-WP_005238876.1	0.716209		cds-WP_005242371.1	0.861004		cds-WP_025432197.1	0.991332
cds-WP_005238418.1	1		cds-WP_005238418.1	1		cds-WP_005243187.1	0.962571		cds-WP_005238418.1	1		cds-WP_005239064.1	0.716209		cds-WP_037183206.1	0.860529		cds-WP_025431738.1	0.991217
cds-WP_005238419.1	1		cds-WP_005238419.1	1		cds-WP_005240103.1	0.962463		cds-WP_005238419.1	1		cds-WP_005239295.1	0.716209		cds-WP_025432915.1	0.86039		cds-WP_025432162.1	0.991161
cds-WP_005238424.1	1		cds-WP_005238424.1	1		cds-WP_164709609.1	0.962365		cds-WP_005238424.1	1		cds-WP_005239333.1	0.716209		cds-WP_005242367.1	0.860299		cds-WP_005252714.1	0.991098
cds-WP_005238441.1	1		cds-WP_005238441.1	1		cds-WP_005240340.1	0.962348		cds-WP_005238441.1	1		cds-WP_005239412.1	0.716209		cds-WP_025432105.1	0.859318		cds-WP_005251670.1	0.991061
cds-WP_005238442.1	1		cds-WP_005238442.1	1		cds-WP_025432391.1	0.962289		cds-WP_005238442.1	1		cds-WP_005239448.1	0.716209		cds-WP_005248485.1	0.859265		cds-WP_005251648.1	0.990991
cds-WP_005238450.1	1		cds-WP_005238450.1	1		cds-WP_005247973.1	0.96228		cds-WP_005238450.1	1		cds-WP_005239544.1	0.716209		cds-WP_005238509.1	0.858949		cds-WP_005237856.1	0.990922
cds-WP_005238454.1	1		cds-WP_005238454.1	1		cds-WP_085990781.1	0.962209		cds-WP_005238454.1	1		cds-WP_005239585.1	0.716209		cds-WP_025432720.1	0.857635		cds-WP_005248761.1	0.990911
cds-WP_005238456.1	1		cds-WP_005238456.1	1		cds-WP_005244617.1	0.96216		cds-WP_005238456.1	1		cds-WP_005239632.1	0.716209		cds-WP_005251854.1	0.857575		cds-WP_005243975.1	0.990807
cds-WP_005238467.1	1		cds-WP_005238467.1	1		cds-WP_005246397.1	0.962072		cds-WP_005238467.1	1		cds-WP_005239633.1	0.716209		cds-WP_005252180.1	0.857209		cds-WP_025433134.1	0.990797
cds-WP_005238470.1	1		cds-WP_005238470.1	1		cds-WP_005250998.1	0.961608		cds-WP_005238470.1	1		cds-WP_005239634.1	0.716209		cds-WP_005239684.1	0.85659		cds-WP_005251956.1	0.990779
cds-WP_005238493.1	1		cds-WP_005238493.1	1		cds-WP_037181684.1	0.961526		cds-WP_005238493.1	1		cds-WP_005239635.1	0.716209		cds-WP_005244074.1	0.856345		cds-WP_005251366.1	0.990527
cds-WP_005238498.1	1		cds-WP_005238498.1	1		cds-WP_226955658.1	0.961524		cds-WP_005238498.1	1		cds-WP_005239637.1	0.716209		cds-WP_025433217.1	0.85536		cds-WP_005251677.1	0.99039
cds-WP_005238506.1	1		cds-WP_005238506.1	1		cds-WP_005241810.1	0.96149		cds-WP_005238506.1	1		cds-WP_005239639.1	0.716209		cds-WP_005255435.1	0.854784		cds-WP_025432372.1	0.990237
cds-WP_005238508.1	1		cds-WP_005238508.1	1		cds-WP_025432392.1	0.961348		cds-WP_005238508.1	1		cds-WP_005239657.1	0.716209		cds-WP_005248114.1	0.854081		cds-WP_005237890.1	0.990212
cds-WP_005238509.1	1		cds-WP_005238509.1	1		cds-WP_005248972.1	0.961077		cds-WP_005238509.1	1		cds-WP_005239662.1	0.716209		cds-WP_005249217.1	0.853655		cds-WP_264297285.1	0.990203
cds-WP_005238528.1	1		cds-WP_005238528.1	1		cds-WP_226955672.1	0.960847		cds-WP_005238528.1	1		cds-WP_005239667.1	0.716209		cds-WP_005239333.1	0.851638		cds-WP_005252387.1	0.99013
cds-WP_005238543.1	1		cds-WP_005238543.1	1		cds-WP_005252949.1	0.960779		cds-WP_005238543.1	1		cds-WP_005239680.1	0.716209		cds-WP_025431787.1	0.851517		cds-WP_005243547.1	0.990106
cds-WP_005238566.1	1		cds-WP_005238566.1	1		cds-WP_025432878.1	0.960729		cds-WP_005238566.1	1		cds-WP_005239683.1	0.716209		cds-WP_226955883.1	0.851373		cds-WP_025432290.1	0.989814
cds-WP_005238569.1	1		cds-WP_005238569.1	1		cds-WP_005255533.1	0.96059		cds-WP_005238569.1	1		cds-WP_005239684.1	0.716209		cds-WP_005248982.1	0.851366		cds-WP_005239693.1	0.989745
cds-WP_005238579.1	1		cds-WP_005238579.1	1		cds-WP_005253188.1	0.959695		cds-WP_005238579.1	1		cds-WP_005239845.1	0.716209		cds-WP_005243155.1	0.850634		cds-WP_005240344.1	0.989739
cds-WP_005238588.1	1		cds-WP_005238588.1	1		cds-WP_005240336.1	0.959599		cds-WP_005238588.1	1		cds-WP_005240049.1	0.716209		cds-WP_005239667.1	0.850457		cds-WP_025431551.1	0.989697
cds-WP_005238590.1	1		cds-WP_005238590.1	1		cds-WP_005239823.1	0.959149		cds-WP_005238590.1	1		cds-WP_005240110.1	0.716209		cds-WP_005242382.1	0.849576		cds-WP_025432602.1	0.989683
cds-WP_005238592.1	1		cds-WP_005238592.1	1		cds-WP_025433156.1	0.959129		cds-WP_005238592.1	1		cds-WP_005240214.1	0.716209		cds-WP_005244827.1	0.848859		cds-WP_025432922.1	0.989584
cds-WP_005238594.1	1		cds-WP_005238594.1	1		cds-WP_005246676.1	0.959016		cds-WP_005238594.1	1		cds-WP_005240494.1	0.716209		cds-WP_005252492.1	0.847691		cds-WP_005238658.1	0.989563
cds-WP_005238596.1	1		cds-WP_005238596.1	1		cds-WP_005238748.1	0.958028		cds-WP_005238596.1	1		cds-WP_005241270.1	0.716209		cds-WP_005250787.1	0.847043		cds-WP_005248281.1	0.989557
cds-WP_005238598.1	1		cds-WP_005238598.1	1		cds-WP_005248831.1	0.958002		cds-WP_005238598.1	1		cds-WP_005241348.1	0.716209		cds-WP_005246086.1	0.846632		cds-WP_005238872.1	0.989545
cds-WP_005238600.1	1		cds-WP_005238600.1	1		cds-K2Z90_RS22950	0.957841		cds-WP_005238600.1	1		cds-WP_005241412.1	0.716209		cds-WP_005250030.1	0.846155		cds-WP_005249317.1	0.98954
cds-WP_005238602.1	1		cds-WP_005238602.1	1		cds-WP_005248491.1	0.957761		cds-WP_005238602.1	1		cds-WP_005241600.1	0.716209		cds-WP_005249180.1	0.845355		cds-WP_025431780.1	0.989412
cds-WP_005238605.1	1		cds-WP_005238605.1	1		cds-WP_005237974.1	0.957658		cds-WP_005238605.1	1		cds-WP_005241784.1	0.716209		cds-WP_005239102.1	0.844247		cds-WP_005248726.1	0.989324
cds-WP_005238608.1	1		cds-WP_005238608.1	1		cds-WP_005250288.1	0.957624		cds-WP_005238608.1	1		cds-WP_005242369.1	0.716209		cds-WP_005237824.1	0.843775		cds-WP_005243141.1	0.989265
cds-WP_005238613.1	1		cds-WP_005238613.1	1		cds-WP_005252231.1	0.957485		cds-WP_005238613.1	1		cds-WP_005242382.1	0.716209		cds-WP_005250769.1	0.843775		cds-WP_025433107.1	0.989191
cds-WP_005238615.1	1		cds-WP_005238615.1	1		cds-WP_005251379.1	0.956824		cds-WP_005238615.1	1		cds-WP_005242845.1	0.716209		cds-WP_025432547.1	0.843559		cds-WP_005251971.1	0.989158
cds-WP_005238620.1	1		cds-WP_005238620.1	1		cds-WP_005248217.1	0.95668		cds-WP_005238620.1	1		cds-WP_005243010.1	0.716209		cds-WP_005237974.1	0.842247		cds-WP_005252054.1	0.98913
cds-WP_005238650.1	1		cds-WP_005238650.1	1		cds-WP_025432581.1	0.956669		cds-WP_005238650.1	1		cds-WP_005243533.1	0.716209		cds-WP_264297255.1	0.842111		cds-WP_005243939.1	0.989111
cds-WP_005238652.1	1		cds-WP_005238652.1	1		cds-WP_025433220.1	0.956357		cds-WP_005238652.1	1		cds-WP_005243597.1	0.716209		cds-WP_025431565.1	0.841443		cds-WP_025432982.1	0.989074
cds-WP_005238656.1	1		cds-WP_005238656.1	1		cds-WP_005251530.1	0.956293		cds-WP_005238656.1	1		cds-WP_005243625.1	0.716209		cds-WP_037181850.1	0.841428		cds-WP_037179885.1	0.989069
cds-WP_005238658.1	1		cds-WP_005238658.1	1		cds-WP_005243718.1	0.956269		cds-WP_005238658.1	1		cds-WP_005243645.1	0.716209		cds-WP_025432418.1	0.841334		cds-WP_025431676.1	0.989059
cds-WP_005238661.1	1		cds-WP_005238661.1	1		cds-WP_005249106.1	0.956103		cds-WP_005238661.1	1		cds-WP_005243692.1	0.716209		cds-WP_005239660.1	0.840137		cds-WP_005249076.1	0.988992
cds-WP_005238665.1	1		cds-WP_005238665.1	1		cds-WP_005241678.1	0.955851		cds-WP_005238665.1	1		cds-WP_005243826.1	0.716209		cds-WP_005237961.1	0.83874		cds-WP_005243981.1	0.988928
cds-WP_005238669.1	1		cds-WP_005238669.1	1		cds-WP_005243171.1	0.955309		cds-WP_005238669.1	1		cds-WP_005243881.1	0.716209		cds-WP_025432315.1	0.837865		cds-WP_226955683.1	0.988916
cds-WP_005238685.1	1		cds-WP_005238685.1	1		cds-WP_005246071.1	0.954946		cds-WP_005238685.1	1		cds-WP_005243885.1	0.716209		cds-WP_037181821.1	0.837272		cds-WP_005251922.1	0.988895
cds-WP_005238689.1	1		cds-WP_005238689.1	1		cds-WP_025432411.1	0.954559		cds-WP_005238689.1	1		cds-WP_005244180.1	0.716209		cds-WP_005251928.1	0.837243		cds-WP_005240167.1	0.98888
cds-WP_005238699.1	1		cds-WP_005238699.1	1		cds-WP_005247657.1	0.9545		cds-WP_005238699.1	1		cds-WP_005244590.1	0.716209		cds-WP_005258232.1	0.837224		cds-WP_037179237.1	0.98885
cds-WP_005238704.1	1		cds-WP_005238704.1	1		cds-WP_025431940.1	0.954474		cds-WP_005238704.1	1		cds-WP_005244634.1	0.716209		cds-WP_037183104.1	0.836082		cds-WP_005252394.1	0.988762
cds-WP_005238720.1	1		cds-WP_005238720.1	1		cds-WP_005240383.1	0.95447		cds-WP_005238720.1	1		cds-WP_005244691.1	0.716209		cds-WP_025433292.1	0.835876		cds-WP_005243655.1	0.988732
cds-WP_005238721.1	1		cds-WP_005238721.1	1		cds-WP_005247630.1	0.954312		cds-WP_005238721.1	1		cds-WP_005244733.1	0.716209		cds-WP_005247883.1	0.835819		cds-WP_005248628.1	0.98865
cds-WP_005238724.1	1		cds-WP_005238724.1	1		cds-WP_226955497.1	0.9541		cds-WP_005238724.1	1		cds-WP_005244790.1	0.716209		cds-WP_025432670.1	0.833613		cds-WP_005248797.1	0.988559
cds-WP_005238731.1	1		cds-WP_005238731.1	1		cds-WP_005244413.1	0.95405		cds-WP_005238731.1	1		cds-WP_005244800.1	0.716209		cds-WP_005239443.1	0.833592		cds-WP_005238965.1	0.988547
cds-WP_005238743.1	1		cds-WP_005238743.1	1		cds-WP_025431581.1	0.954048		cds-WP_005238743.1	1		cds-WP_005244878.1	0.716209		cds-WP_005242124.1	0.833175		cds-WP_264297287.1	0.988438
cds-WP_005238747.1	1		cds-WP_005238747.1	1		cds-WP_005247836.1	0.953939		cds-WP_005238747.1	1		cds-WP_005244907.1	0.716209		cds-WP_005252888.1	0.8312		cds-WP_005247759.1	0.988418
cds-WP_005238748.1	1		cds-WP_005238748.1	1		cds-WP_005240799.1	0.953853		cds-WP_005238748.1	1		cds-WP_005245521.1	0.716209		cds-WP_005240701.1	0.83106		cds-WP_005243653.1	0.988375
cds-WP_005238754.1	1		cds-WP_005238754.1	1		cds-WP_025432547.1	0.95383		cds-WP_005238754.1	1		cds-WP_005246128.1	0.716209		cds-WP_005238669.1	0.83084		cds-WP_005238600.1	0.988331
cds-WP_005238757.1	1		cds-WP_005238757.1	1		cds-WP_005244854.1	0.952938		cds-WP_005238757.1	1		cds-WP_005246230.1	0.716209		cds-WP_025432827.1	0.830621		cds-WP_005252904.1	0.988292
cds-WP_005238766.1	1		cds-WP_005238766.1	1		cds-WP_025431800.1	0.952895		cds-WP_005238766.1	1		cds-WP_005246309.1	0.716209		cds-WP_025431919.1	0.830409		cds-WP_025432119.1	0.988291
cds-WP_005238769.1	1		cds-WP_005238769.1	1		cds-WP_025433516.1	0.952837		cds-WP_005238769.1	1		cds-WP_005246398.1	0.716209		cds-WP_005255533.1	0.830057		cds-WP_005248809.1	0.988258
cds-WP_005238771.1	1		cds-WP_005238771.1	1		cds-WP_005241787.1	0.952595		cds-WP_005238771.1	1		cds-WP_005246430.1	0.716209		cds-WP_005247640.1	0.829992		cds-WP_025433420.1	0.988217
cds-WP_005238775.1	1		cds-WP_005238775.1	1		cds-WP_005244344.1	0.952032		cds-WP_005238775.1	1		cds-WP_005246496.1	0.716209		cds-WP_005239567.1	0.829896		cds-WP_005241800.1	0.988183
cds-WP_005238780.1	1		cds-WP_005238780.1	1		cds-WP_005250799.1	0.951908		cds-WP_005238780.1	1		cds-WP_005246654.1	0.716209		cds-WP_264297262.1	0.829536		cds-WP_005238569.1	0.988094
cds-WP_005238781.1	1		cds-WP_005238781.1	1		cds-WP_005242373.1	0.951373		cds-WP_005238781.1	1		cds-WP_005247561.1	0.716209		cds-WP_005240849.1	0.827758		cds-WP_005248502.1	0.988062
cds-WP_005238788.1	1		cds-WP_005238788.1	1		cds-WP_005241600.1	0.951346		cds-WP_005238788.1	1		cds-WP_005247575.1	0.716209		cds-WP_005249835.1	0.827638		cds-WP_005249635.1	0.988031
cds-WP_005238789.1	1		cds-WP_005238789.1	1		cds-WP_025431971.1	0.951317		cds-WP_005238789.1	1		cds-WP_005247630.1	0.716209		cds-WP_005244634.1	0.826366		cds-WP_005248781.1	0.98803
cds-WP_005238791.1	1		cds-WP_005238791.1	1		cds-WP_005242369.1	0.951268		cds-WP_005238791.1	1		cds-WP_005247669.1	0.716209		cds-WP_005238724.1	0.825888		cds-WP_025433304.1	0.987964
cds-WP_005238792.1	1		cds-WP_005238792.1	1		cds-WP_025433161.1	0.951162		cds-WP_005238792.1	1		cds-WP_005247770.1	0.716209		cds-WP_005242937.1	0.825747		cds-WP_025432373.1	0.987846
cds-WP_005238794.1	1		cds-WP_005238794.1	1		cds-WP_005249135.1	0.951136		cds-WP_005238794.1	1		cds-WP_005247855.1	0.716209		cds-WP_025432958.1	0.825566		cds-WP_025433574.1	0.98773
cds-WP_005238799.1	1		cds-WP_005238799.1	1		cds-WP_005247840.1	0.951049		cds-WP_005238799.1	1		cds-WP_005247896.1	0.716209		cds-WP_005243467.1	0.824516		cds-WP_025433147.1	0.987633
cds-WP_005238803.1	1		cds-WP_005238803.1	1		cds-WP_005243756.1	0.950898		cds-WP_005238803.1	1		cds-WP_005247957.1	0.716209		cds-WP_005237778.1	0.824003		cds-WP_005243931.1	0.987598
cds-WP_005238834.1	1		cds-WP_005238834.1	1		cds-WP_025432542.1	0.950861		cds-WP_005238834.1	1		cds-WP_005248085.1	0.716209		cds-WP_080578252.1	0.823574		cds-WP_025433121.1	0.987572
cds-WP_005238840.1	1		cds-WP_005238840.1	1		cds-WP_025431565.1	0.95037		cds-WP_005238840.1	1		cds-WP_005248111.1	0.716209		cds-WP_025433476.1	0.822867		cds-WP_005247733.1	0.987356
cds-WP_005238844.1	1		cds-WP_005238844.1	1		cds-WP_005243714.1	0.950262		cds-WP_005238844.1	1		cds-WP_005248246.1	0.716209		cds-WP_005243754.1	0.822424		cds-WP_025432930.1	0.987351
cds-WP_005238845.1	1		cds-WP_005238845.1	1		cds-WP_025431815.1	0.950257		cds-WP_005238845.1	1		cds-WP_005248516.1	0.716209		cds-WP_005251300.1	0.822279		cds-WP_005242980.1	0.98725
cds-WP_005238847.1	1		cds-WP_005238847.1	1		cds-WP_005244377.1	0.950126		cds-WP_005238847.1	1		cds-WP_005248772.1	0.716209		cds-WP_005251635.1	0.821974		cds-WP_005242993.1	0.987168
cds-WP_005238851.1	1		cds-WP_005238851.1	1		cds-WP_025433088.1	0.950027		cds-WP_005238851.1	1		cds-WP_005248844.1	0.716209		cds-WP_025431620.1	0.821723		cds-WP_005239602.1	0.987162
cds-WP_005238854.1	1		cds-WP_005238854.1	1		cds-WP_005243597.1	0.949653		cds-WP_005238854.1	1		cds-WP_005248900.1	0.716209		cds-WP_005251983.1	0.821388		cds-WP_005247517.1	0.987092
cds-WP_005238863.1	1		cds-WP_005238863.1	1		cds-WP_080702728.1	0.948915		cds-WP_005238863.1	1		cds-WP_005248925.1	0.716209		cds-WP_005247561.1	0.821232		cds-WP_005250766.1	0.987062
cds-WP_005238864.1	1		cds-WP_005238864.1	1		cds-WP_005244016.1	0.948753		cds-WP_005238864.1	1		cds-WP_005249239.1	0.716209		cds-WP_025432227.1	0.820518		cds-WP_228380631.1	0.987052
cds-WP_005238869.1	1		cds-WP_005238869.1	1		cds-WP_025431767.1	0.948701		cds-WP_005238869.1	1		cds-WP_005249254.1	0.716209		cds-WP_025432740.1	0.819579		cds-WP_005239291.1	0.986934
cds-WP_005238872.1	1		cds-WP_005238872.1	1		cds-WP_037179849.1	0.948374		cds-WP_005238872.1	1		cds-WP_005249271.1	0.716209		cds-WP_005237796.1	0.818881		cds-WP_005248814.1	0.986868
cds-WP_005238875.1	1		cds-WP_005238875.1	1		cds-WP_025433105.1	0.948304		cds-WP_005238875.1	1		cds-WP_005249483.1	0.716209		cds-WP_005241810.1	0.818658		cds-WP_005251736.1	0.986728
cds-WP_005238876.1	1		cds-WP_005238876.1	1		cds-WP_005241721.1	0.948222		cds-WP_005238876.1	1		cds-WP_005249686.1	0.716209		cds-WP_005251924.1	0.817966		cds-WP_025431548.1	0.986662
cds-WP_005238877.1	1		cds-WP_005238877.1	1		cds-WP_025432915.1	0.948201		cds-WP_005238877.1	1		cds-WP_005249897.1	0.716209		cds-WP_005240833.1	0.817746		cds-WP_005252441.1	0.986647
cds-WP_005238892.1	1		cds-WP_005238892.1	1		cds-WP_005240064.1	0.948162		cds-WP_005238892.1	1		cds-WP_005249980.1	0.716209		cds-WP_005249836.1	0.817591		cds-WP_005239342.1	0.986555
cds-WP_005238894.1	1		cds-WP_005238894.1	1		cds-WP_005248838.1	0.947952		cds-WP_005238894.1	1		cds-WP_005250075.1	0.716209		cds-WP_005242802.1	0.817064		cds-WP_037179238.1	0.986498
cds-WP_005238898.1	1		cds-WP_005238898.1	1		cds-WP_005238669.1	0.947572		cds-WP_005238898.1	1		cds-WP_005250807.1	0.716209		cds-WP_005239362.1	0.816929		cds-WP_025431756.1	0.986486
cds-WP_005238900.1	1		cds-WP_005238900.1	1		cds-WP_005240849.1	0.94744		cds-WP_005238900.1	1		cds-WP_005250843.1	0.716209		cds-WP_037179058.1	0.816526		cds-WP_005251522.1	0.986439
cds-WP_005238903.1	1		cds-WP_005238903.1	1		cds-WP_005238598.1	0.947301		cds-WP_005238903.1	1		cds-WP_005250861.1	0.716209		cds-WP_005239634.1	0.816282		cds-WP_005240628.1	0.986397
cds-WP_005238920.1	1		cds-WP_005238920.1	1		cds-WP_025432213.1	0.94721		cds-WP_005238920.1	1		cds-WP_005250868.1	0.716209		cds-WP_005241036.1	0.815117		cds-WP_226955525.1	0.986394
cds-WP_005238933.1	1		cds-WP_005238933.1	1		cds-WP_005243092.1	0.946816		cds-WP_005238933.1	1		cds-WP_005250948.1	0.716209		cds-WP_005263380.1	0.814278		cds-WP_005247522.1	0.986342
cds-WP_005238935.1	1		cds-WP_005238935.1	1		cds-WP_005243467.1	0.946659		cds-WP_005238935.1	1		cds-WP_005250966.1	0.716209		cds-WP_025432400.1	0.814042		cds-WP_005238991.1	0.986279
cds-WP_005238941.1	1		cds-WP_005238941.1	1		cds-WP_005247450.1	0.946647		cds-WP_005238941.1	1		cds-WP_005250988.1	0.716209		cds-WP_005251230.1	0.813745		cds-WP_005251655.1	0.986244
cds-WP_005238942.1	1		cds-WP_005238942.1	1		cds-WP_005252943.1	0.946416		cds-WP_005238942.1	1		cds-WP_005251046.1	0.716209		cds-WP_005249781.1	0.813706		cds-WP_005258512.1	0.986243
cds-WP_005238944.1	1		cds-WP_005238944.1	1		cds-WP_226955541.1	0.94635		cds-WP_005238944.1	1		cds-WP_005251128.1	0.716209		cds-WP_226955718.1	0.812797		cds-WP_005243068.1	0.986224
cds-WP_005238947.1	1		cds-WP_005238947.1	1		cds-WP_226955547.1	0.946327		cds-WP_005238947.1	1		cds-WP_005251205.1	0.716209		cds-WP_005251516.1	0.812362		cds-WP_005238588.1	0.986224
cds-WP_005238960.1	1		cds-WP_005238960.1	1		cds-WP_005243754.1	0.945924		cds-WP_005238960.1	1		cds-WP_005251244.1	0.716209		cds-WP_005245037.1	0.811984		cds-WP_005251902.1	0.986209
cds-WP_005238965.1	1		cds-WP_005238965.1	1		cds-WP_005244590.1	0.945923		cds-WP_005238965.1	1		cds-WP_005251375.1	0.716209		cds-WP_005237830.1	0.81191		cds-WP_005246395.1	0.98619
cds-WP_005238973.1	1		cds-WP_005238973.1	1		cds-WP_025431634.1	0.945733		cds-WP_005238973.1	1		cds-WP_005251543.1	0.716209		cds-WP_005244680.1	0.811618		cds-WP_005247923.1	0.986146
cds-WP_005238976.1	1		cds-WP_005238976.1	1		cds-WP_005243835.1	0.945651		cds-WP_005238976.1	1		cds-WP_005251609.1	0.716209		cds-WP_005248218.1	0.810928		cds-WP_005238898.1	0.986136
cds-WP_005238979.1	1		cds-WP_005238979.1	1		cds-WP_025433311.1	0.945485		cds-WP_005238979.1	1		cds-WP_005251635.1	0.716209		cds-WP_005252934.1	0.810915		cds-WP_005251592.1	0.986052
cds-WP_005238985.1	1		cds-WP_005238985.1	1		cds-WP_005251984.1	0.945097		cds-WP_005238985.1	1		cds-WP_005251771.1	0.716209		cds-WP_005244291.1	0.810897		cds-WP_005240402.1	0.986044
cds-WP_005238991.1	1		cds-WP_005238991.1	1		cds-WP_005247637.1	0.945063		cds-WP_005238991.1	1		cds-WP_005251892.1	0.716209		cds-WP_005250007.1	0.81027		cds-WP_005247472.1	0.986002
cds-WP_005238995.1	1		cds-WP_005238995.1	1		cds-WP_005263664.1	0.945004		cds-WP_005238995.1	1		cds-WP_005252000.1	0.716209		cds-WP_005244334.1	0.810254		cds-WP_005259110.1	0.985984
cds-WP_005239003.1	1		cds-WP_005239003.1	1		cds-K2Z90_RS12370	0.945003		cds-WP_005239003.1	1		cds-WP_005252134.1	0.716209		cds-WP_003938068.1	0.810252		cds-WP_005244417.1	0.98597
cds-WP_005239017.1	1		cds-WP_005239017.1	1		cds-WP_025433299.1	0.944762		cds-WP_005239017.1	1		cds-WP_005252137.1	0.716209		cds-WP_005248815.1	0.809504		cds-WP_005247766.1	0.985912
cds-WP_005239048.1	1		cds-WP_005239048.1	1		cds-WP_085990776.1	0.944408		cds-WP_005239048.1	1		cds-WP_005252247.1	0.716209		cds-WP_005244099.1	0.808778		cds-WP_226955705.1	0.985896
cds-WP_005239064.1	1		cds-WP_005239064.1	1		cds-WP_005251979.1	0.944225		cds-WP_005239064.1	1		cds-WP_005252328.1	0.716209		cds-WP_005242495.1	0.806525		cds-WP_005251482.1	0.985873
cds-WP_005239068.1	1		cds-WP_005239068.1	1		cds-WP_005247484.1	0.944121		cds-WP_005239068.1	1		cds-WP_005252393.1	0.716209		cds-WP_005238255.1	0.806044		cds-WP_005243139.1	0.985839
cds-WP_005239077.1	1		cds-WP_005239077.1	1		cds-WP_005244831.1	0.94399		cds-WP_005239077.1	1		cds-WP_005252427.1	0.716209		cds-WP_226955644.1	0.805818		cds-WP_005250385.1	0.98583
cds-WP_005239102.1	1		cds-WP_005239102.1	1		cds-WP_061044208.1	0.943781		cds-WP_005239102.1	1		cds-WP_005252569.1	0.716209		cds-WP_005248948.1	0.805472		cds-WP_025433094.1	0.985757
cds-WP_005239113.1	1		cds-WP_005239113.1	1		cds-WP_005240246.1	0.943553		cds-WP_005239113.1	1		cds-WP_005252732.1	0.716209		cds-WP_025431677.1	0.805273		cds-WP_005238098.1	0.985739
cds-WP_005239117.1	1		cds-WP_005239117.1	1		cds-WP_005244531.1	0.943058		cds-WP_005239117.1	1		cds-WP_005252774.1	0.716209		cds-WP_005239926.1	0.804845		cds-WP_005248139.1	0.985727
cds-WP_005239118.1	1		cds-WP_005239118.1	1		cds-WP_005252328.1	0.942739		cds-WP_005239118.1	1		cds-WP_005253188.1	0.716209		cds-WP_005238973.1	0.80445		cds-WP_005238803.1	0.98571
cds-WP_005239121.1	1		cds-WP_005239121.1	1		cds-WP_005238665.1	0.942631		cds-WP_005239121.1	1		cds-WP_005254252.1	0.716209		cds-WP_005239729.1	0.804196		cds-WP_005244040.1	0.985706
cds-WP_005239177.1	1		cds-WP_005239177.1	1		cds-WP_005240135.1	0.942474		cds-WP_005239177.1	1		cds-WP_005257351.1	0.716209		cds-WP_005246093.1	0.803997		cds-WP_005244056.1	0.98557
cds-WP_005239230.1	1		cds-WP_005239230.1	1		cds-WP_005246398.1	0.94208		cds-WP_005239230.1	1		cds-WP_005259707.1	0.716209		cds-WP_005251272.1	0.803243		cds-WP_005238388.1	0.985563
cds-WP_005239234.1	1		cds-WP_005239234.1	1		cds-WP_005242135.1	0.941988		cds-WP_005239234.1	1		cds-WP_005259920.1	0.716209		cds-WP_005251234.1	0.802577		cds-WP_025431817.1	0.98555
cds-WP_005239236.1	1		cds-WP_005239236.1	1		cds-WP_025433288.1	0.941742		cds-WP_005239236.1	1		cds-WP_005263480.1	0.716209		cds-WP_005240738.1	0.80251		cds-WP_005238493.1	0.98555
cds-WP_005239244.1	1		cds-WP_005239244.1	1		cds-WP_005239429.1	0.941537		cds-WP_005239244.1	1		cds-WP_009474169.1	0.716209		cds-WP_005244344.1	0.802044		cds-WP_005238746.1	0.985514
cds-WP_005239253.1	1		cds-WP_005239253.1	1		cds-WP_005252063.1	0.941435		cds-WP_005239253.1	1		cds-WP_025431546.1	0.716209		cds-WP_005244992.1	0.801571		cds-WP_005240310.1	0.985495
cds-WP_005239266.1	1		cds-WP_005239266.1	1		cds-WP_005244063.1	0.941324		cds-WP_005239266.1	1		cds-WP_025431584.1	0.716209		cds-WP_005237953.1	0.800451		cds-WP_025431890.1	0.985389
cds-WP_005239275.1	1		cds-WP_005239275.1	1		cds-WP_005252380.1	0.941059		cds-WP_005239275.1	1		cds-WP_025431592.1	0.716209		cds-WP_005240438.1	0.800074		cds-WP_005238892.1	0.985365
cds-WP_005239291.1	1		cds-WP_005239291.1	1		cds-WP_025433006.1	0.941027		cds-WP_005239291.1	1		cds-WP_025431594.1	0.716209		cds-WP_025431816.1	0.799605		cds-WP_005251203.1	0.985153
cds-WP_005239302.1	1		cds-WP_005239302.1	1		cds-WP_005251269.1	0.940998		cds-WP_005239302.1	1		cds-WP_025431642.1	0.716209		cds-WP_005248978.1	0.799192		cds-WP_005238840.1	0.984997
cds-WP_005239304.1	1		cds-WP_005239304.1	1		cds-WP_025432298.1	0.940772		cds-WP_005239304.1	1		cds-WP_025431644.1	0.716209		cds-WP_025433156.1	0.799061		cds-WP_005250502.1	0.98499
cds-WP_005239314.1	1		cds-WP_005239314.1	1		cds-WP_005240808.1	0.940759		cds-WP_005239314.1	1		cds-WP_025431677.1	0.716209		cds-WP_061040798.1	0.797923		cds-WP_005248048.1	0.984975
cds-WP_005239333.1	1		cds-WP_005239333.1	1		cds-WP_005252469.1	0.940686		cds-WP_005239333.1	1		cds-WP_025431733.1	0.716209		cds-WP_016883983.1	0.797888		cds-WP_025432189.1	0.984947
cds-WP_005239338.1	1		cds-WP_005239338.1	1		cds-WP_005240048.1	0.940678		cds-WP_005239338.1	1		cds-WP_025431734.1	0.716209		cds-WP_005238775.1	0.797861		cds-WP_025431818.1	0.984947
cds-WP_005239342.1	1		cds-WP_005239342.1	1		cds-WP_011596917.1	0.940547		cds-WP_005239342.1	1		cds-WP_025431739.1	0.716209		cds-WP_005242840.1	0.795519		cds-WP_025431635.1	0.984882
cds-WP_005239354.1	1		cds-WP_005239354.1	1		cds-WP_005250759.1	0.940233		cds-WP_005239354.1	1		cds-WP_025431845.1	0.716209		cds-WP_037180869.1	0.795021		cds-WP_005244422.1	0.984853
cds-WP_005239362.1	1		cds-WP_005239362.1	1		cds-WP_025432169.1	0.940214		cds-WP_005239362.1	1		cds-WP_025431857.1	0.716209		cds-WP_005246620.1	0.794953		cds-WP_025433278.1	0.984814
cds-WP_005239374.1	1		cds-WP_005239374.1	1		cds-WP_005248124.1	0.940207		cds-WP_005239374.1	1		cds-WP_025431881.1	0.716209		cds-WP_226955497.1	0.794005		cds-WP_025433213.1	0.984786
cds-WP_005239376.1	1		cds-WP_005239376.1	1		cds-WP_005247506.1	0.939826		cds-WP_005239376.1	1		cds-WP_025431913.1	0.716209		cds-WP_005250036.1	0.793803		cds-WP_005244585.1	0.984699
cds-WP_005239384.1	1		cds-WP_005239384.1	1		cds-WP_005241386.1	0.939807		cds-WP_005239384.1	1		cds-WP_025431961.1	0.716209		cds-WP_005248591.1	0.793237		cds-WP_005240746.1	0.984636
cds-WP_005239390.1	1		cds-WP_005239390.1	1		cds-WP_005244305.1	0.939593		cds-WP_005239390.1	1		cds-WP_025431971.1	0.716209		cds-WP_005248772.1	0.792804		cds-WP_025432891.1	0.984629
cds-WP_005239397.1	1		cds-WP_005239397.1	1		cds-WP_005245026.1	0.93959		cds-WP_005239397.1	1		cds-WP_025432093.1	0.716209		cds-WP_005252000.1	0.792711		cds-WP_005252262.1	0.984598
cds-WP_005239409.1	1		cds-WP_005239409.1	1		cds-WP_025433557.1	0.93934		cds-WP_005239409.1	1		cds-WP_025432152.1	0.716209		cds-WP_005240868.1	0.792703		cds-WP_005247937.1	0.98455
cds-WP_005239412.1	1		cds-WP_005239412.1	1		cds-WP_005247891.1	0.939199		cds-WP_005239412.1	1		cds-WP_025432227.1	0.716209		cds-WP_005250948.1	0.790889		cds-WP_025433584.1	0.984512
cds-WP_005239414.1	1		cds-WP_005239414.1	1		cds-WP_005238863.1	0.939175		cds-WP_005239414.1	1		cds-WP_025432251.1	0.716209		cds-WP_025432581.1	0.790809		cds-WP_005242769.1	0.984459
cds-WP_005239418.1	1		cds-WP_005239418.1	1		cds-WP_005238470.1	0.939008		cds-WP_005239418.1	1		cds-WP_025432326.1	0.716209		cds-WP_043943950.1	0.789989		cds-WP_005246205.1	0.984453
cds-WP_005239423.1	1		cds-WP_005239423.1	1		cds-WP_005238704.1	0.938992		cds-WP_005239423.1	1		cds-WP_025432571.1	0.716209		cds-WP_025431559.1	0.789905		cds-WP_005252133.1	0.984359
cds-WP_005239426.1	1		cds-WP_005239426.1	1		cds-WP_005239003.1	0.938778		cds-WP_005239426.1	1		cds-WP_025432597.1	0.716209		cds-WP_005250374.1	0.78978		cds-WP_005247573.1	0.984334
cds-WP_005239429.1	1		cds-WP_005239429.1	1		cds-WP_005249245.1	0.938586		cds-WP_005239429.1	1		cds-WP_025432600.1	0.716209		cds-WP_005243187.1	0.789765		cds-WP_005250970.1	0.984329
cds-WP_005239439.1	1		cds-WP_005239439.1	1		cds-WP_025432130.1	0.938532		cds-WP_005239439.1	1		cds-WP_025432607.1	0.716209		cds-WP_005241207.1	0.789691		cds-WP_005252021.1	0.984326
cds-WP_005239443.1	1		cds-WP_005239443.1	1		cds-WP_005248635.1	0.938519		cds-WP_005239443.1	1		cds-WP_025432813.1	0.716209		cds-WP_005247962.1	0.788342		cds-WP_226955696.1	0.98427
cds-WP_005239448.1	1		cds-WP_005239448.1	1		cds-WP_005240047.1	0.938444		cds-WP_005239448.1	1		cds-WP_025432924.1	0.716209		cds-WP_005247836.1	0.788009		cds-WP_005245011.1	0.984221
cds-WP_005239455.1	1		cds-WP_005239455.1	1		cds-WP_005251588.1	0.938372		cds-WP_005239455.1	1		cds-WP_025433069.1	0.716209		cds-WP_005243663.1	0.787983		cds-WP_025432153.1	0.984208
cds-WP_005239471.1	1		cds-WP_005239471.1	1		cds-WP_025432916.1	0.938326		cds-WP_005239471.1	1		cds-WP_025433082.1	0.716209		cds-WP_005252734.1	0.787791		cds-WP_005246101.1	0.984201
cds-WP_005239478.1	1		cds-WP_005239478.1	1		cds-WP_005248622.1	0.938155		cds-WP_005239478.1	1		cds-WP_025433125.1	0.716209		cds-WP_005244854.1	0.787751		cds-WP_005248465.1	0.984133
cds-WP_005239495.1	1		cds-WP_005239495.1	1		cds-WP_005249850.1	0.937849		cds-WP_005239495.1	1		cds-WP_025433317.1	0.716209		cds-WP_005251381.1	0.787676		cds-WP_005249229.1	0.984124
cds-WP_005239497.1	1		cds-WP_005239497.1	1		cds-WP_005247738.1	0.937737		cds-WP_005239497.1	1		cds-WP_025433404.1	0.716209		cds-WP_025432215.1	0.787402		cds-WP_226955703.1	0.984079
cds-WP_005239499.1	1		cds-WP_005239499.1	1		cds-WP_080578276.1	0.937574		cds-WP_005239499.1	1		cds-WP_025433505.1	0.716209		cds-WP_005248217.1	0.786967		cds-WP_005244486.1	0.984047
cds-WP_005239500.1	1		cds-WP_005239500.1	1		cds-WP_005239253.1	0.937499		cds-WP_005239500.1	1		cds-WP_025433525.1	0.716209		cds-WP_005239503.1	0.785989		cds-WP_005244775.1	0.984041
cds-WP_005239501.1	1		cds-WP_005239501.1	1		cds-WP_005240282.1	0.937458		cds-WP_005239501.1	1		cds-WP_025433612.1	0.716209		cds-WP_005246678.1	0.785078		cds-WP_085990803.1	0.983903
cds-WP_005239502.1	1		cds-WP_005239502.1	1		cds-WP_025432967.1	0.937403		cds-WP_005239502.1	1		cds-WP_025433622.1	0.716209		cds-WP_005251244.1	0.784186		cds-WP_025433256.1	0.983852
cds-WP_005239503.1	1		cds-WP_005239503.1	1		cds-WP_005240761.1	0.936816		cds-WP_005239503.1	1		cds-WP_037179138.1	0.716209		cds-WP_005239003.1	0.783862		cds-WP_025431615.1	0.983806
cds-WP_005239504.1	1		cds-WP_005239504.1	1		cds-WP_005238317.1	0.936797		cds-WP_005239504.1	1		cds-WP_037179365.1	0.716209		cds-WP_005575144.1	0.783175		cds-WP_005244108.1	0.983806
cds-WP_005239508.1	1		cds-WP_005239508.1	1		cds-WP_005250071.1	0.936787		cds-WP_005239508.1	1		cds-WP_037182564.1	0.716209		cds-WP_005248298.1	0.782919		cds-WP_166680705.1	0.983723
cds-WP_005239511.1	1		cds-WP_005239511.1	1		cds-WP_005252960.1	0.936557		cds-WP_005239511.1	1		cds-WP_043943823.1	0.716209		cds-WP_005239573.1	0.782549		cds-WP_085990779.1	0.983678
cds-WP_005239513.1	1		cds-WP_005239513.1	1		cds-WP_005240286.1	0.936445		cds-WP_005239513.1	1		cds-WP_043943825.1	0.716209		cds-WP_025432462.1	0.78211		cds-WP_005248475.1	0.983644
cds-WP_005239544.1	1		cds-WP_005239544.1	1		cds-WP_005251059.1	0.936391		cds-WP_005239544.1	1		cds-WP_085990776.1	0.716209		cds-WP_005244506.1	0.781916		cds-WP_037179041.1	0.983639
cds-WP_005239548.1	1		cds-WP_005239548.1	1		cds-WP_005248617.1	0.935884		cds-WP_005239548.1	1		cds-WP_164709609.1	0.716209		cds-WP_005251830.1	0.781044		cds-WP_005244182.1	0.983631
cds-WP_005239560.1	1		cds-WP_005239560.1	1		cds-WP_005238769.1	0.935809		cds-WP_005239560.1	1		cds-WP_187300183.1	0.716209		cds-WP_025433830.1	0.78013		cds-WP_005249079.1	0.983611
cds-WP_005239563.1	1		cds-WP_005239563.1	1		cds-WP_025431685.1	0.935629		cds-WP_005239563.1	1		cds-WP_226955541.1	0.716209		cds-WP_005251236.1	0.779924		cds-WP_025431665.1	0.983604
cds-WP_005239567.1	1		cds-WP_005239567.1	1		cds-WP_005243995.1	0.935416		cds-WP_005239567.1	1		cds-WP_226955596.1	0.716209		cds-WP_025432263.1	0.779869		cds-WP_005251756.1	0.983547
cds-WP_005239573.1	1		cds-WP_005239573.1	1		cds-WP_005244131.1	0.935268		cds-WP_005239573.1	1		cds-WP_264297272.1	0.716209		cds-WP_005248111.1	0.779306		cds-WP_005248640.1	0.983346
cds-WP_005239585.1	1		cds-WP_005239585.1	1		cds-WP_005251609.1	0.935058		cds-WP_005239585.1	1		cds-WP_264297273.1	0.716209		cds-K2Z90_RS08810	0.778336		cds-WP_025433506.1	0.983306
cds-WP_005239598.1	1		cds-WP_005239598.1	1		cds-WP_005238419.1	0.934737		cds-WP_005239598.1	1		cds-WP_005237780.1	0.685331		cds-WP_005239956.1	0.776844		cds-WP_226955722.1	0.982977
cds-WP_005239613.1	1		cds-WP_005239613.1	1		cds-WP_005250007.1	0.93473		cds-WP_005239613.1	1		cds-WP_005237785.1	0.685331		cds-WP_003940820.1	0.776642		cds-WP_025433231.1	0.982844
cds-WP_005239632.1	1		cds-WP_005239632.1	1		cds-WP_005243954.1	0.934668		cds-WP_005239632.1	1		cds-WP_005237789.1	0.685331		cds-WP_005248470.1	0.775982		cds-WP_005240679.1	0.982825
cds-WP_005239633.1	1		cds-WP_005239633.1	1		cds-WP_005248477.1	0.934504		cds-WP_005239633.1	1		cds-WP_005237854.1	0.685331		cds-WP_005239511.1	0.774955		cds-WP_005246087.1	0.982654
cds-WP_005239634.1	1		cds-WP_005239634.1	1		cds-WP_005238097.1	0.934315		cds-WP_005239634.1	1		cds-WP_005237940.1	0.685331		cds-WP_005250991.1	0.774878		cds-WP_025431771.1	0.982624
cds-WP_005239636.1	1		cds-WP_005239636.1	1		cds-WP_005242388.1	0.934294		cds-WP_005239636.1	1		cds-WP_005237946.1	0.685331		cds-WP_005243853.1	0.774451		cds-WP_005237941.1	0.982582
cds-WP_005239637.1	1		cds-WP_005239637.1	1		cds-WP_005241006.1	0.934253		cds-WP_005239637.1	1		cds-WP_005237974.1	0.685331		cds-WP_005243651.1	0.774218		cds-WP_025431758.1	0.982572
cds-WP_005239638.1	1		cds-WP_005239638.1	1		cds-WP_025432881.1	0.93384		cds-WP_005239638.1	1		cds-WP_005238133.1	0.685331		cds-WP_005250152.1	0.77337		cds-WP_005244870.1	0.982532
cds-WP_005239639.1	1		cds-WP_005239639.1	1		cds-WP_080578252.1	0.933381		cds-WP_005239639.1	1		cds-WP_005238136.1	0.685331		cds-WP_005251997.1	0.772851		cds-WP_005240923.1	0.982423
cds-WP_005239642.1	1		cds-WP_005239642.1	1		cds-WP_005252404.1	0.933271		cds-WP_005239642.1	1		cds-WP_005238306.1	0.685331		cds-WP_025432521.1	0.772416		cds-WP_025431763.1	0.982407
cds-WP_005239644.1	1		cds-WP_005239644.1	1		cds-WP_025431642.1	0.933257		cds-WP_005239644.1	1		cds-WP_005238337.1	0.685331		cds-WP_005252829.1	0.771597		cds-WP_005251207.1	0.982387
cds-WP_005239657.1	1		cds-WP_005239657.1	1		cds-WP_025431960.1	0.932684		cds-WP_005239657.1	1		cds-WP_005238409.1	0.685331		cds-WP_005250860.1	0.771383		cds-WP_005244083.1	0.982368
cds-WP_005239658.1	1		cds-WP_005239658.1	1		cds-WP_005240315.1	0.932415		cds-WP_005239658.1	1		cds-WP_005238506.1	0.685331		cds-WP_005250910.1	0.77112		cds-WP_005244861.1	0.98233
cds-WP_005239660.1	1		cds-WP_005239660.1	1		cds-WP_005237953.1	0.932379		cds-WP_005239660.1	1		cds-WP_005238528.1	0.685331		cds-WP_025431729.1	0.771119		cds-WP_025431744.1	0.982201
cds-WP_005239662.1	1		cds-WP_005239662.1	1		cds-WP_025431903.1	0.93234		cds-WP_005239662.1	1		cds-WP_005238566.1	0.685331		cds-WP_025432192.1	0.770988		cds-WP_005260374.1	0.982179
cds-WP_005239667.1	1		cds-WP_005239667.1	1		cds-WP_025432344.1	0.932237		cds-WP_005239667.1	1		cds-WP_005238602.1	0.685331		cds-WP_005248105.1	0.77054		cds-WP_025431736.1	0.982122
cds-WP_005239680.1	1		cds-WP_005239680.1	1		cds-WP_025432554.1	0.932134		cds-WP_005239680.1	1		cds-WP_005238605.1	0.685331		cds-WP_005248585.1	0.770317		cds-WP_005258779.1	0.982065
cds-WP_005239683.1	1		cds-WP_005239683.1	1		cds-WP_005250392.1	0.932078		cds-WP_005239683.1	1		cds-WP_005238613.1	0.685331		cds-WP_005248030.1	0.769953		cds-WP_005241020.1	0.982063
cds-WP_005239684.1	1		cds-WP_005239684.1	1		cds-WP_005240901.1	0.931822		cds-WP_005239684.1	1		cds-WP_005238647.1	0.685331		cds-WP_226955509.1	0.768955		cds-WP_005244137.1	0.982043
cds-WP_005239692.1	1		cds-WP_005239692.1	1		cds-WP_005239501.1	0.931609		cds-WP_005239692.1	1		cds-WP_005238650.1	0.685331		cds-WP_005246405.1	0.768903		cds-WP_005250938.1	0.981999
cds-WP_005239693.1	1		cds-WP_005239693.1	1		cds-WP_005252732.1	0.931535		cds-WP_005239693.1	1		cds-WP_005238661.1	0.685331		cds-WP_005243685.1	0.768258		cds-WP_025432394.1	0.981965
cds-WP_005239719.1	1		cds-WP_005239719.1	1		cds-WP_005238900.1	0.931303		cds-WP_005239719.1	1		cds-WP_005238665.1	0.685331		cds-WP_005239499.1	0.767733		cds-WP_005248892.1	0.981865
cds-WP_005239729.1	1		cds-WP_005239729.1	1		cds-WP_025432101.1	0.930713		cds-WP_005239729.1	1		cds-WP_005238699.1	0.685331		cds-WP_005249187.1	0.767335		cds-WP_187300260.1	0.98185
cds-WP_005239736.1	1		cds-WP_005239736.1	1		cds-WP_005247642.1	0.930657		cds-WP_005239736.1	1		cds-WP_005238724.1	0.685331		cds-WP_005251050.1	0.766859		cds-WP_005250760.1	0.981784
cds-WP_005239745.1	1		cds-WP_005239745.1	1		cds-WP_025433599.1	0.930635		cds-WP_005239745.1	1		cds-WP_005238824.1	0.685331		cds-WP_005250982.1	0.766483		cds-WP_005250836.1	0.981764
cds-WP_005239747.1	1		cds-WP_005239747.1	1		cds-WP_025431907.1	0.930576		cds-WP_005239747.1	1		cds-WP_005238828.1	0.685331		cds-WP_005252386.1	0.766393		cds-WP_005250990.1	0.981684
cds-WP_005239770.1	1		cds-WP_005239770.1	1		cds-WP_080578158.1	0.930404		cds-WP_005239770.1	1		cds-WP_005238847.1	0.685331		cds-WP_025432967.1	0.766316		cds-WP_005242947.1	0.981658
cds-WP_005239793.1	1		cds-WP_005239793.1	1		cds-WP_025432227.1	0.930328		cds-WP_005239793.1	1		cds-WP_005238854.1	0.685331		cds-WP_005239439.1	0.76607		cds-WP_025433233.1	0.981639
cds-WP_005239818.1	1		cds-WP_005239818.1	1		cds-WP_005238602.1	0.930134		cds-WP_005239818.1	1		cds-WP_005238894.1	0.685331		cds-WP_187300183.1	0.765698		cds-WP_025431862.1	0.981613
cds-WP_005239823.1	1		cds-WP_005239823.1	1		cds-WP_025433476.1	0.930068		cds-WP_005239823.1	1		cds-WP_005238903.1	0.685331		cds-WP_005239978.1	0.763882		cds-WP_005243738.1	0.981604
cds-WP_005239831.1	1		cds-WP_005239831.1	1		cds-WP_037181821.1	0.930068		cds-WP_005239831.1	1		cds-WP_005238935.1	0.685331		cds-WP_025432247.1	0.763732		cds-WP_005251404.1	0.981542
cds-WP_005239839.1	1		cds-WP_005239839.1	1		cds-WP_005237780.1	0.92986		cds-WP_005239839.1	1		cds-WP_005238941.1	0.685331		cds-WP_264297286.1	0.762966		cds-WP_005264648.1	0.981515
cds-WP_005239845.1	1		cds-WP_005239845.1	1		cds-WP_025433262.1	0.929585		cds-WP_005239845.1	1		cds-WP_005239003.1	0.685331		cds-WP_005245025.1	0.762649		cds-WP_005248500.1	0.981373
cds-WP_005239852.1	1		cds-WP_005239852.1	1		cds-WP_061700978.1	0.92922		cds-WP_005239852.1	1		cds-WP_005239177.1	0.685331		cds-WP_025432169.1	0.76262		cds-WP_005238594.1	0.98131
cds-WP_005239875.1	1		cds-WP_005239875.1	1		cds-WP_005251065.1	0.929123		cds-WP_005239875.1	1		cds-WP_005239314.1	0.685331		cds-WP_005242909.1	0.762301		cds-WP_005248208.1	0.981225
cds-WP_005239878.1	1		cds-WP_005239878.1	1		cds-WP_005248928.1	0.929114		cds-WP_005239878.1	1		cds-WP_005239360.1	0.685331		cds-WP_005250533.1	0.762257		cds-WP_025432360.1	0.981192
cds-WP_005239891.1	1		cds-WP_005239891.1	1		cds-WP_226955684.1	0.92884		cds-WP_005239891.1	1		cds-WP_005239406.1	0.685331		cds-WP_005242355.1	0.762086		cds-WP_005246070.1	0.98119
cds-WP_005239894.1	1		cds-WP_005239894.1	1		cds-WP_005239573.1	0.928623		cds-WP_005239894.1	1		cds-WP_005239471.1	0.685331		cds-WP_005242362.1	0.761843		cds-WP_005249208.1	0.981141
cds-WP_005239930.1	1		cds-WP_005239930.1	1		cds-WP_005240312.1	0.928607		cds-WP_005239930.1	1		cds-WP_005239499.1	0.685331		cds-WP_005248805.1	0.761686		cds-WP_025432007.1	0.981139
cds-WP_005239940.1	1		cds-WP_005239940.1	1		cds-WP_005239448.1	0.928573		cds-WP_005239940.1	1		cds-WP_005239501.1	0.685331		cds-WP_025433604.1	0.761131		cds-WP_005244003.1	0.981018
cds-WP_005239950.1	1		cds-WP_005239950.1	1		cds-WP_005250550.1	0.928477		cds-WP_005239950.1	1		cds-WP_005239502.1	0.685331		cds-WP_005252901.1	0.760561		cds-WP_005244891.1	0.981011
cds-WP_005239956.1	1		cds-WP_005239956.1	1		cds-WP_005244451.1	0.928211		cds-WP_005239956.1	1		cds-WP_005239563.1	0.685331		cds-WP_005251691.1	0.760521		cds-WP_005237791.1	0.981006
cds-WP_005239957.1	1		cds-WP_005239957.1	1		cds-WP_005245256.1	0.927674		cds-WP_005239957.1	1		cds-WP_005239636.1	0.685331		cds-WP_037179427.1	0.760404		cds-WP_005244518.1	0.98098
cds-WP_005239964.1	1		cds-WP_005239964.1	1		cds-WP_005240533.1	0.927621		cds-WP_005239964.1	1		cds-WP_005239640.1	0.685331		cds-WP_005244993.1	0.760216		cds-WP_025431667.1	0.980952
cds-WP_005239966.1	1		cds-WP_005239966.1	1		cds-WP_005251473.1	0.927438		cds-WP_005239966.1	1		cds-WP_005239770.1	0.685331		cds-WP_005250998.1	0.759157		cds-WP_226955748.1	0.980725
cds-WP_005239980.1	1		cds-WP_005239980.1	1		cds-WP_005240701.1	0.9272		cds-WP_005239980.1	1		cds-WP_005239823.1	0.685331		cds-WP_005240691.1	0.7591		cds-WP_025432843.1	0.980723
cds-WP_005239990.1	1		cds-WP_005239990.1	1		cds-WP_005244608.1	0.926867		cds-WP_005239990.1	1		cds-WP_005239964.1	0.685331		cds-WP_005248516.1	0.757844		cds-WP_025433091.1	0.980618
cds-WP_005240001.1	1		cds-WP_005240001.1	1		cds-WP_005252757.1	0.926747		cds-WP_005240001.1	1		cds-WP_005240048.1	0.685331		cds-WP_005250456.1	0.757739		cds-WP_025433175.1	0.980567
cds-WP_005240047.1	1		cds-WP_005240047.1	1		cds-WP_005249997.1	0.926668		cds-WP_005240047.1	1		cds-WP_005240059.1	0.685331		cds-WP_005243771.1	0.757516		cds-WP_005238424.1	0.980554
cds-WP_005240048.1	1		cds-WP_005240048.1	1		cds-WP_005252784.1	0.92647		cds-WP_005240048.1	1		cds-WP_005240064.1	0.685331		cds-WP_005248496.1	0.757447		cds-WP_005249289.1	0.980513
cds-WP_005240049.1	1		cds-WP_005240049.1	1		cds-WP_005247957.1	0.926367		cds-WP_005240049.1	1		cds-WP_005240097.1	0.685331		cds-WP_025433639.1	0.755952		cds-WP_005252458.1	0.980495
cds-WP_005240062.1	1		cds-WP_005240062.1	1		cds-WP_025433639.1	0.926103		cds-WP_005240062.1	1		cds-WP_005240114.1	0.685331		cds-WP_005240572.1	0.755735		cds-WP_005242801.1	0.980316
cds-WP_005240064.1	1		cds-WP_005240064.1	1		cds-WP_025433229.1	0.926091		cds-WP_005240064.1	1		cds-WP_005240192.1	0.685331		cds-WP_005238470.1	0.755209		cds-WP_025433624.1	0.980277
cds-WP_005240076.1	1		cds-WP_005240076.1	1		cds-WP_005239680.1	0.926061		cds-WP_005240076.1	1		cds-WP_005240312.1	0.685331		cds-WP_037179849.1	0.754032		cds-WP_005244787.1	0.980239
cds-WP_005240077.1	1		cds-WP_005240077.1	1		cds-WP_005238792.1	0.926028		cds-WP_005240077.1	1		cds-WP_005240315.1	0.685331		cds-WP_025433312.1	0.753657		cds-WP_005240869.1	0.980227
cds-WP_005240097.1	1		cds-WP_005240097.1	1		cds-WP_005258203.1	0.925982		cds-WP_005240097.1	1		cds-WP_005240363.1	0.685331		cds-WP_005240698.1	0.753368		cds-WP_005240429.1	0.980223
cds-WP_005240102.1	1		cds-WP_005240102.1	1		cds-WP_005244088.1	0.925954		cds-WP_005240102.1	1		cds-WP_005240369.1	0.685331		cds-WP_025432163.1	0.753286		cds-WP_226955633.1	0.980211
cds-WP_005240103.1	1		cds-WP_005240103.1	1		cds-WP_179443189.1	0.925622		cds-WP_005240103.1	1		cds-WP_005240516.1	0.685331		cds-WP_005250911.1	0.753121		cds-WP_025431682.1	0.980168
cds-WP_005240106.1	1		cds-WP_005240106.1	1		cds-WP_005244599.1	0.925192		cds-WP_005240106.1	1		cds-WP_005240566.1	0.685331		cds-WP_005240760.1	0.752983		cds-WP_005258295.1	0.980149
cds-WP_005240110.1	1		cds-WP_005240110.1	1		cds-WP_025433302.1	0.925187		cds-WP_005240110.1	1		cds-WP_005240568.1	0.685331		cds-WP_009474169.1	0.752655		cds-WP_005245024.1	0.979996
cds-WP_005240114.1	1		cds-WP_005240114.1	1		cds-WP_005237854.1	0.925181		cds-WP_005240114.1	1		cds-WP_005240583.1	0.685331		cds-WP_025433477.1	0.751123		cds-WP_005248868.1	0.979968
cds-WP_005240116.1	1		cds-WP_005240116.1	1		cds-WP_005240110.1	0.925114		cds-WP_005240116.1	1		cds-WP_005240626.1	0.685331		cds-WP_005240062.1	0.75106		cds-WP_005247372.1	0.979939
cds-WP_005240135.1	1		cds-WP_005240135.1	1		cds-WP_005242753.1	0.925065		cds-WP_005240135.1	1		cds-WP_005240670.1	0.685331		cds-WP_025431815.1	0.750993		cds-WP_226955665.1	0.97987
cds-WP_005240141.1	1		cds-WP_005240141.1	1		cds-WP_005260190.1	0.924476		cds-WP_005240141.1	1		cds-WP_005240744.1	0.685331		cds-WP_007295767.1	0.75096		cds-WP_005238960.1	0.979832
cds-WP_005240143.1	1		cds-WP_005240143.1	1		cds-WP_025433129.1	0.924469		cds-WP_005240143.1	1		cds-WP_005240761.1	0.685331		cds-WP_005247829.1	0.750383		cds-WP_005251594.1	0.979751
cds-WP_005240147.1	1		cds-WP_005240147.1	1		cds-WP_005239845.1	0.924382		cds-WP_005240147.1	1		cds-WP_005240767.1	0.685331		cds-WP_005246356.1	0.750311		cds-WP_025432872.1	0.979745
cds-WP_005240152.1	1		cds-WP_005240152.1	1		cds-WP_226955781.1	0.924102		cds-WP_005240152.1	1		cds-WP_005240808.1	0.685331		cds-WP_025431930.1	0.750084		cds-WP_005240319.1	0.979744
cds-WP_005240158.1	1		cds-WP_005240158.1	1		cds-WP_005252452.1	0.924098		cds-WP_005240158.1	1		cds-WP_005240868.1	0.685331		cds-WP_005252675.1	0.750024		cds-WP_005240910.1	0.979741
cds-WP_005240167.1	1		cds-WP_005240167.1	1		cds-WP_005254252.1	0.924068		cds-WP_005240167.1	1		cds-WP_005240969.1	0.685331		cds-WP_025432165.1	0.749849		cds-WP_025431609.1	0.97973
cds-WP_005240192.1	1		cds-WP_005240192.1	1		cds-WP_005239478.1	0.92381		cds-WP_005240192.1	1		cds-WP_005240987.1	0.685331		cds-WP_025432191.1	0.749804		cds-WP_025432517.1	0.979718
cds-WP_005240205.1	1		cds-WP_005240205.1	1		cds-WP_005252863.1	0.923686		cds-WP_005240205.1	1		cds-WP_005241202.1	0.685331		cds-WP_025433009.1	0.74962		cds-WP_005244618.1	0.979674
cds-WP_005240214.1	1		cds-WP_005240214.1	1		cds-WP_005248925.1	0.923627		cds-WP_005240214.1	1		cds-WP_005241723.1	0.685331		cds-WP_025431944.1	0.749529		cds-WP_005248330.1	0.979612
cds-WP_005240218.1	1		cds-WP_005240218.1	1		cds-WP_005240992.1	0.923374		cds-WP_005240218.1	1		cds-WP_005241787.1	0.685331		cds-WP_005240914.1	0.749393		cds-WP_005247707.1	0.979603
cds-WP_005240222.1	1		cds-WP_005240222.1	1		cds-WP_025433164.1	0.923333		cds-WP_005240222.1	1		cds-WP_005242116.1	0.685331		cds-WP_005248525.1	0.749211		cds-WP_005243056.1	0.979555
cds-WP_005240232.1	1		cds-WP_005240232.1	1		cds-WP_005238509.1	0.923237		cds-WP_005240232.1	1		cds-WP_005242145.1	0.685331		cds-WP_005238660.1	0.748762		cds-WP_005244167.1	0.979539
cds-WP_005240246.1	1		cds-WP_005240246.1	1		cds-WP_025432398.1	0.922923		cds-WP_005240246.1	1		cds-WP_005242146.1	0.685331		cds-WP_005241417.1	0.748548		cds-WP_025433248.1	0.979536
cds-WP_005240256.1	1		cds-WP_005240256.1	1		cds-WP_025431638.1	0.922443		cds-WP_005240256.1	1		cds-WP_005242359.1	0.685331		cds-WP_005244377.1	0.748316		cds-WP_025432555.1	0.979493
cds-WP_005240266.1	1		cds-WP_005240266.1	1		cds-WP_005242722.1	0.922407		cds-WP_005240266.1	1		cds-WP_005242367.1	0.685331		cds-WP_005245096.1	0.748114		cds-WP_226955582.1	0.979361
cds-WP_005240272.1	1		cds-WP_005240272.1	1		cds-WP_005237942.1	0.922302		cds-WP_005240272.1	1		cds-WP_005242753.1	0.685331		cds-WP_226955651.1	0.747613		cds-WP_005245250.1	0.97936
cds-WP_005240282.1	1		cds-WP_005240282.1	1		cds-WP_005239852.1	0.922161		cds-WP_005240282.1	1		cds-WP_005242937.1	0.685331		cds-WP_005246296.1	0.746897		cds-WP_005250985.1	0.979356
cds-WP_005240284.1	1		cds-WP_005240284.1	1		cds-WP_005252150.1	0.922101		cds-WP_005240284.1	1		cds-WP_005242938.1	0.685331		cds-WP_025431832.1	0.746626		cds-WP_005249999.1	0.979307
cds-WP_005240286.1	1		cds-WP_005240286.1	1		cds-WP_005252471.1	0.921624		cds-WP_005240286.1	1		cds-WP_005242967.1	0.685331		cds-WP_005241270.1	0.745908		cds-WP_025432426.1	0.979281
cds-WP_005240295.1	1		cds-WP_005240295.1	1		cds-WP_005249088.1	0.921588		cds-WP_005240295.1	1		cds-WP_005242971.1	0.685331		cds-WP_005250027.1	0.745712		cds-WP_005244456.1	0.979164
cds-WP_005240310.1	1		cds-WP_005240310.1	1		cds-WP_005249959.1	0.921518		cds-WP_005240310.1	1		cds-WP_005243040.1	0.685331		cds-WP_005251734.1	0.745666		cds-WP_037180746.1	0.979104
cds-WP_005240312.1	1		cds-WP_005240312.1	1		cds-WP_005252894.1	0.921426		cds-WP_005240312.1	1		cds-WP_005243092.1	0.685331		cds-WP_037180077.1	0.745476		cds-WP_005249133.1	0.979065
cds-WP_005240313.1	1		cds-WP_005240313.1	1		cds-WP_005240466.1	0.921308		cds-WP_005240313.1	1		cds-WP_005243110.1	0.685331		cds-WP_005244451.1	0.745194		cds-WP_025433059.1	0.979046
cds-WP_005240315.1	1		cds-WP_005240315.1	1		cds-WP_005248805.1	0.9212		cds-WP_005240315.1	1		cds-WP_005243112.1	0.685331		cds-WP_005237840.1	0.74507		cds-WP_005239950.1	0.979033
cds-WP_005240319.1	1		cds-WP_005240319.1	1		cds-WP_005244926.1	0.921045		cds-WP_005240319.1	1		cds-WP_005243126.1	0.685331		cds-WP_005243684.1	0.745024		cds-WP_025432338.1	0.978999
cds-WP_005240325.1	1		cds-WP_005240325.1	1		cds-WP_005240062.1	0.92093		cds-WP_005240325.1	1		cds-WP_005243130.1	0.685331		cds-WP_005239637.1	0.744991		cds-WP_005241845.1	0.978979
cds-WP_005240334.1	1		cds-WP_005240334.1	1		cds-WP_005243625.1	0.920602		cds-WP_005240334.1	1		cds-WP_005243144.1	0.685331		cds-WP_226955672.1	0.744764		cds-WP_005244840.1	0.978948
cds-WP_005240336.1	1		cds-WP_005240336.1	1		cds-WP_005250988.1	0.920376		cds-WP_005240336.1	1		cds-WP_005243203.1	0.685331		cds-WP_025431625.1	0.744649		cds-WP_005251539.1	0.978917
cds-WP_005240338.1	1		cds-WP_005240338.1	1		cds-WP_005243881.1	0.92023		cds-WP_005240338.1	1		cds-WP_005243473.1	0.685331		cds-WP_005253188.1	0.744588		cds-WP_005244857.1	0.978893
cds-WP_005240340.1	1		cds-WP_005240340.1	1		cds-WP_005240626.1	0.920177		cds-WP_005240340.1	1		cds-WP_005243605.1	0.685331		cds-WP_025432295.1	0.743749		cds-WP_025433249.1	0.978881
cds-WP_005240344.1	1		cds-WP_005240344.1	1		cds-WP_025432385.1	0.920115		cds-WP_005240344.1	1		cds-WP_005243624.1	0.685331		cds-WP_025432987.1	0.743368		cds-WP_005243736.1	0.978776
cds-WP_005240363.1	1		cds-WP_005240363.1	1		cds-WP_005253670.1	0.919991		cds-WP_005240363.1	1		cds-WP_005243713.1	0.685331		cds-WP_005262154.1	0.743055		cds-WP_005239275.1	0.978666
cds-WP_005240383.1	1		cds-WP_005240383.1	1		cds-WP_179443301.1	0.919869		cds-WP_005240383.1	1		cds-WP_005243722.1	0.685331		cds-WP_005240734.1	0.742467		cds-WP_005244234.1	0.978641
cds-WP_005240388.1	1		cds-WP_005240388.1	1		cds-WP_005240319.1	0.919659		cds-WP_005240388.1	1		cds-WP_005243729.1	0.685331		cds-WP_005240783.1	0.741361		cds-WP_025432090.1	0.978396
cds-WP_005240402.1	1		cds-WP_005240402.1	1		cds-WP_005241813.1	0.919547		cds-WP_005240402.1	1		cds-WP_005243756.1	0.685331		cds-WP_005244505.1	0.741201		cds-WP_005248630.1	0.978381
cds-WP_005240414.1	1		cds-WP_005240414.1	1		cds-WP_025432903.1	0.919372		cds-WP_005240414.1	1		cds-WP_005243791.1	0.685331		cds-WP_005252856.1	0.740797		cds-WP_005240999.1	0.978359
cds-WP_005240427.1	1		cds-WP_005240427.1	1		cds-WP_025433584.1	0.919307		cds-WP_005240427.1	1		cds-WP_005243810.1	0.685331		cds-WP_005239638.1	0.740554		cds-WP_005253670.1	0.978346
cds-WP_005240440.1	1		cds-WP_005240440.1	1		cds-WP_226955596.1	0.919294		cds-WP_005240440.1	1		cds-WP_005243811.1	0.685331		cds-WP_005238699.1	0.739776		cds-WP_005248623.1	0.978331
cds-WP_005240442.1	1		cds-WP_005240442.1	1		cds-WP_005244877.1	0.91917		cds-WP_005240442.1	1		cds-WP_005243839.1	0.685331		cds-WP_025432942.1	0.739537		cds-WP_005251624.1	0.978297
cds-WP_005240466.1	1		cds-WP_005240466.1	1		cds-WP_005248114.1	0.919152		cds-WP_005240466.1	1		cds-WP_005243901.1	0.685331		cds-WP_025433167.1	0.739334		cds-WP_005248606.1	0.978235
cds-WP_005240469.1	1		cds-WP_005240469.1	1		cds-WP_005252675.1	0.919047		cds-WP_005240469.1	1		cds-WP_005243958.1	0.685331		cds-WP_005241386.1	0.739067		cds-WP_025431836.1	0.97815
cds-WP_005240471.1	1		cds-WP_005240471.1	1		cds-WP_005248613.1	0.918679		cds-WP_005240471.1	1		cds-WP_005244016.1	0.685331		cds-WP_025431705.1	0.738826		cds-WP_025433223.1	0.978103
cds-WP_005240477.1	1		cds-WP_005240477.1	1		cds-WP_005238107.1	0.918554		cds-WP_005240477.1	1		cds-WP_005244066.1	0.685331		cds-WP_005240608.1	0.738487		cds-WP_025432331.1	0.978001
cds-WP_005240481.1	1		cds-WP_005240481.1	1		cds-WP_025432879.1	0.918485		cds-WP_005240481.1	1		cds-WP_005244074.1	0.685331		cds-WP_025432411.1	0.738034		cds-WP_005243767.1	0.977978
cds-WP_005240486.1	1		cds-WP_005240486.1	1		cds-WP_005241862.1	0.918314		cds-WP_005240486.1	1		cds-WP_005244077.1	0.685331		cds-WP_005240363.1	0.737383		cds-WP_025432836.1	0.977971
cds-WP_005240494.1	1		cds-WP_005240494.1	1		cds-WP_025431682.1	0.918101		cds-WP_005240494.1	1		cds-WP_005244098.1	0.685331		cds-WP_005238731.1	0.737124		cds-WP_005252883.1	0.977913
cds-WP_005240527.1	1		cds-WP_005240527.1	1		cds-WP_005246078.1	0.917996		cds-WP_005240527.1	1		cds-WP_005244135.1	0.685331		cds-WP_025431739.1	0.736981		cds-WP_005262018.1	0.97789
cds-WP_005240533.1	1		cds-WP_005240533.1	1		cds-WP_005248869.1	0.917725		cds-WP_005240533.1	1		cds-WP_005244140.1	0.685331		cds-WP_005242359.1	0.73677		cds-WP_005247895.1	0.977829
cds-WP_005240566.1	1		cds-WP_005240566.1	1		cds-WP_025431679.1	0.917516		cds-WP_005240566.1	1		cds-WP_005244236.1	0.685331		cds-WP_005247642.1	0.736406		cds-WP_025432580.1	0.977766
cds-WP_005240572.1	1		cds-WP_005240572.1	1		cds-WP_005252427.1	0.917467		cds-WP_005240572.1	1		cds-WP_005244302.1	0.685331		cds-WP_005243707.1	0.736339		cds-WP_005240995.1	0.977719
cds-WP_005240577.1	1		cds-WP_005240577.1	1		cds-WP_166680705.1	0.917044		cds-WP_005240577.1	1		cds-WP_005244325.1	0.685331		cds-WP_005243597.1	0.736334		cds-WP_005251310.1	0.977681
cds-WP_005240583.1	1		cds-WP_005240583.1	1		cds-WP_025432525.1	0.91699		cds-WP_005240583.1	1		cds-WP_005244337.1	0.685331		cds-WP_025431581.1	0.735864		cds-WP_005239230.1	0.977609
cds-WP_005240587.1	1		cds-WP_005240587.1	1		cds-WP_025431892.1	0.916524		cds-WP_005240587.1	1		cds-WP_005244344.1	0.685331		cds-WP_005243820.1	0.735204		cds-WP_005244346.1	0.977573
cds-WP_005240589.1	1		cds-WP_005240589.1	1		cds-WP_005248847.1	0.916226		cds-WP_005240589.1	1		cds-WP_005244400.1	0.685331		cds-WP_005239940.1	0.735117		cds-WP_025431715.1	0.977483
cds-WP_005240591.1	1		cds-WP_005240591.1	1		cds-WP_025431822.1	0.916101		cds-WP_005240591.1	1		cds-WP_005244531.1	0.685331		cds-WP_005244873.1	0.733645		cds-WP_005251227.1	0.977456
cds-WP_005240596.1	1		cds-WP_005240596.1	1		cds-WP_005251571.1	0.915982		cds-WP_005240596.1	1		cds-WP_005244553.1	0.685331		cds-WP_005249241.1	0.733528		cds-WP_005248914.1	0.97741
cds-WP_005240598.1	1		cds-WP_005240598.1	1		cds-WP_005249197.1	0.915885		cds-WP_005240598.1	1		cds-WP_005244592.1	0.685331		cds-WP_025431837.1	0.733194		cds-K2Z90_RS08195	0.977355
cds-WP_005240602.1	1		cds-WP_005240602.1	1		cds-WP_037179058.1	0.915811		cds-WP_005240602.1	1		cds-WP_005244617.1	0.685331		cds-WP_025433251.1	0.73278		cds-WP_005262275.1	0.97722
cds-WP_005240606.1	1		cds-WP_005240606.1	1		cds-WP_005250068.1	0.915657		cds-WP_005240606.1	1		cds-WP_005244643.1	0.685331		cds-WP_025431942.1	0.732695		cds-WP_025432994.1	0.977187
cds-WP_005240620.1	1		cds-WP_005240620.1	1		cds-WP_005244066.1	0.915565		cds-WP_005240620.1	1		cds-WP_005244700.1	0.685331		cds-WP_005246375.1	0.732581		cds-WP_005247479.1	0.977158
cds-WP_005240626.1	1		cds-WP_005240626.1	1		cds-WP_005252900.1	0.91551		cds-WP_005240626.1	1		cds-WP_005244798.1	0.685331		cds-WP_005237921.1	0.732501		cds-WP_005262316.1	0.977143
cds-WP_005240628.1	1		cds-WP_005240628.1	1		cds-WP_043943782.1	0.915462		cds-WP_005240628.1	1		cds-WP_005244816.1	0.685331		cds-WP_025432570.1	0.732401		cds-WP_025433074.1	0.977111
cds-WP_005240630.1	1		cds-WP_005240630.1	1		cds-WP_025432570.1	0.915329		cds-WP_005240630.1	1		cds-WP_005244825.1	0.685331		cds-WP_080578212.1	0.73214		cds-WP_005240904.1	0.977067
cds-WP_005240632.1	1		cds-WP_005240632.1	1		cds-WP_025432262.1	0.915248		cds-WP_005240632.1	1		cds-WP_005244837.1	0.685331		cds-WP_005240147.1	0.731833		cds-WP_025433010.1	0.976951
cds-WP_005240640.1	1		cds-WP_005240640.1	1		cds-WP_005238592.1	0.915237		cds-WP_005240640.1	1		cds-WP_005244846.1	0.685331		cds-WP_005239754.1	0.73181		cds-WP_005573288.1	0.976908
cds-WP_005240645.1	1		cds-WP_005240645.1	1		cds-WP_005237923.1	0.915212		cds-WP_005240645.1	1		cds-WP_005244857.1	0.685331		cds-WP_025433093.1	0.731579		cds-WP_025431811.1	0.976846
cds-WP_005240670.1	1		cds-WP_005240670.1	1		cds-WP_005240878.1	0.915196		cds-WP_005240670.1	1		cds-WP_005244859.1	0.685331		cds-WP_005243501.1	0.730984		cds-WP_005242961.1	0.976751
cds-WP_005240674.1	1		cds-WP_005240674.1	1		cds-WP_005244978.1	0.915035		cds-WP_005240674.1	1		cds-WP_005244868.1	0.685331		cds-WP_005244674.1	0.730562		cds-WP_025431812.1	0.97674
cds-WP_005240679.1	1		cds-WP_005240679.1	1		cds-WP_005244101.1	0.915031		cds-WP_005240679.1	1		cds-WP_005244877.1	0.685331		cds-WP_005252280.1	0.730534		cds-WP_025432933.1	0.976709
cds-WP_005240701.1	1		cds-WP_005240701.1	1		cds-WP_005251814.1	0.914972		cds-WP_005240701.1	1		cds-WP_005244887.1	0.685331		cds-WP_025433516.1	0.730472		cds-WP_025432913.1	0.976643
cds-WP_005240710.1	1		cds-WP_005240710.1	1		cds-WP_005262018.1	0.914925		cds-WP_005240710.1	1		cds-WP_005244895.1	0.685331		cds-WP_005247657.1	0.730381		cds-WP_005252935.1	0.976642
cds-WP_005240725.1	1		cds-WP_005240725.1	1		cds-WP_005238131.1	0.914816		cds-WP_005240725.1	1		cds-WP_005244912.1	0.685331		cds-WP_025432217.1	0.729903		cds-WP_226955681.1	0.976599
cds-WP_005240726.1	1		cds-WP_005240726.1	1		cds-WP_005238973.1	0.914678		cds-WP_005240726.1	1		cds-WP_005244926.1	0.685331		cds-WP_025432422.1	0.729692		cds-WP_005251967.1	0.976519
cds-WP_005240731.1	1		cds-WP_005240731.1	1		cds-WP_005241821.1	0.914566		cds-WP_005240731.1	1		cds-WP_005244957.1	0.685331		cds-WP_005239236.1	0.729374		cds-WP_005251483.1	0.976512
cds-WP_005240734.1	1		cds-WP_005240734.1	1		cds-WP_005238699.1	0.914339		cds-WP_005240734.1	1		cds-WP_005244978.1	0.685331		cds-WP_005248464.1	0.729355		cds-WP_005244777.1	0.976504
cds-WP_005240735.1	1		cds-WP_005240735.1	1		cds-WP_005252398.1	0.914166		cds-WP_005240735.1	1		cds-WP_005244982.1	0.685331		cds-WP_025431857.1	0.728873		cds-WP_025431779.1	0.976477
cds-WP_005240737.1	1		cds-WP_005240737.1	1		cds-WP_005252018.1	0.914156		cds-WP_005240737.1	1		cds-WP_005245070.1	0.685331		cds-WP_005243640.1	0.728348		cds-WP_005252845.1	0.97632
cds-WP_005240738.1	1		cds-WP_005240738.1	1		cds-WP_005243762.1	0.913974		cds-WP_005240738.1	1		cds-WP_005246087.1	0.685331		cds-WP_005238055.1	0.728042		cds-WP_025432954.1	0.976232
cds-WP_005240740.1	1		cds-WP_005240740.1	1		cds-WP_005246375.1	0.913958		cds-WP_005240740.1	1		cds-WP_005246090.1	0.685331		cds-K2Z90_RS12980	0.727956		cds-WP_005264659.1	0.976219
cds-WP_005240744.1	1		cds-WP_005240744.1	1		cds-WP_005243157.1	0.913508		cds-WP_005240744.1	1		cds-WP_005246102.1	0.685331		cds-WP_005247669.1	0.727894		cds-WP_005240826.1	0.976182
cds-WP_005240746.1	1		cds-WP_005240746.1	1		cds-WP_005244696.1	0.913331		cds-WP_005240746.1	1		cds-WP_005246119.1	0.685331		cds-WP_005242944.1	0.727861		cds-WP_231913898.1	0.976145
cds-WP_005240748.1	1		cds-WP_005240748.1	1		cds-WP_005238869.1	0.913315		cds-WP_005240748.1	1		cds-WP_005246185.1	0.685331		cds-WP_025431885.1	0.727831		cds-WP_005252259.1	0.976125
cds-WP_005240749.1	1		cds-WP_005240749.1	1		cds-WP_005247783.1	0.913174		cds-WP_005240749.1	1		cds-WP_005246187.1	0.685331		cds-WP_005246397.1	0.727785		cds-WP_005248807.1	0.976004
cds-WP_005240760.1	1		cds-WP_005240760.1	1		cds-WP_005240746.1	0.912961		cds-WP_005240760.1	1		cds-WP_005246192.1	0.685331		cds-WP_005240214.1	0.727108		cds-WP_005249132.1	0.975997
cds-WP_005240761.1	1		cds-WP_005240761.1	1		cds-WP_005251230.1	0.912903		cds-WP_005240761.1	1		cds-WP_005246211.1	0.685331		cds-WP_005252960.1	0.726813		cds-WP_005244373.1	0.975986
cds-WP_005240765.1	1		cds-WP_005240765.1	1		cds-WP_009474702.1	0.912824		cds-WP_005240765.1	1		cds-WP_005246233.1	0.685331		cds-WP_005248839.1	0.726763		cds-WP_005251342.1	0.975983
cds-WP_005240767.1	1		cds-WP_005240767.1	1		cds-WP_005250911.1	0.912497		cds-WP_005240767.1	1		cds-WP_005246240.1	0.685331		cds-WP_025431633.1	0.726667		cds-WP_025431725.1	0.975867
cds-WP_005240777.1	1		cds-WP_005240777.1	1		cds-WP_005243989.1	0.912387		cds-WP_005240777.1	1		cds-WP_005246276.1	0.685331		cds-WP_005252471.1	0.726368		cds-WP_005250367.1	0.975867
cds-WP_005240781.1	1		cds-WP_005240781.1	1		cds-WP_005244970.1	0.912096		cds-WP_005240781.1	1		cds-WP_005246353.1	0.685331		cds-WP_005239409.1	0.726365		cds-WP_226955685.1	0.975864
cds-WP_005240783.1	1		cds-WP_005240783.1	1		cds-WP_005238791.1	0.911834		cds-WP_005240783.1	1		cds-WP_005246379.1	0.685331		cds-WP_005244617.1	0.726131		cds-WP_005243514.1	0.975769
cds-WP_005240786.1	1		cds-WP_005240786.1	1		cds-WP_005247479.1	0.911711		cds-WP_005240786.1	1		cds-WP_005246524.1	0.685331		cds-WP_005240103.1	0.726127		cds-WP_025432260.1	0.975723
cds-WP_005240799.1	1		cds-WP_005240799.1	1		cds-WP_005247567.1	0.911706		cds-WP_005240799.1	1		cds-WP_005246676.1	0.685331		cds-WP_043943811.1	0.72608		cds-WP_025432409.1	0.975659
cds-WP_005240808.1	1		cds-WP_005240808.1	1		cds-WP_005237940.1	0.911566		cds-WP_005240808.1	1		cds-WP_005246678.1	0.685331		cds-WP_005249106.1	0.72606		cds-WP_005243729.1	0.975558
cds-WP_005240828.1	1		cds-WP_005240828.1	1		cds-WP_005249620.1	0.911435		cds-WP_005240828.1	1		cds-WP_005247352.1	0.685331		cds-WP_005240992.1	0.726037		cds-WP_025433203.1	0.975522
cds-WP_005240831.1	1		cds-WP_005240831.1	1		cds-WP_005237808.1	0.91122		cds-WP_005240831.1	1		cds-WP_005247508.1	0.685331		cds-WP_025431825.1	0.725987		cds-WP_005250092.1	0.97542
cds-WP_005240833.1	1		cds-WP_005240833.1	1		cds-WP_005248030.1	0.911085		cds-WP_005240833.1	1		cds-WP_005247566.1	0.685331		cds-WP_025431674.1	0.725649		cds-WP_005248622.1	0.975338
cds-WP_005240849.1	1		cds-WP_005240849.1	1		cds-WP_009474169.1	0.910964		cds-WP_005240849.1	1		cds-WP_005247587.1	0.685331		cds-WP_025432578.1	0.725621		cds-WP_011596606.1	0.975238
cds-WP_005240850.1	1		cds-WP_005240850.1	1		cds-WP_005244135.1	0.910857		cds-WP_005240850.1	1		cds-WP_005247637.1	0.685331		cds-WP_025432813.1	0.72548		cds-WP_005244976.1	0.975168
cds-WP_005240853.1	1		cds-WP_005240853.1	1		cds-WP_005247958.1	0.910755		cds-WP_005240853.1	1		cds-WP_005247657.1	0.685331		cds-WP_005240776.1	0.725175		cds-WP_005573403.1	0.975154
cds-WP_005240854.1	1		cds-WP_005240854.1	1		cds-WP_025433266.1	0.910341		cds-WP_005240854.1	1		cds-WP_005247726.1	0.685331		cds-WP_005250063.1	0.724874		cds-WP_005238442.1	0.975147
cds-WP_005240856.1	1		cds-WP_005240856.1	1		cds-WP_226955678.1	0.91006		cds-WP_005240856.1	1		cds-WP_005247738.1	0.685331		cds-WP_025431755.1	0.724452		cds-WP_226955717.1	0.975133
cds-WP_005240868.1	1		cds-WP_005240868.1	1		cds-WP_025431917.1	0.909764		cds-WP_005240868.1	1		cds-WP_005247783.1	0.685331		cds-WP_179443189.1	0.724117		cds-WP_005243995.1	0.975115
cds-WP_005240878.1	1		cds-WP_005240878.1	1		cds-WP_037182685.1	0.909715		cds-WP_005240878.1	1		cds-WP_005247817.1	0.685331		cds-WP_025433105.1	0.723911		cds-WP_005252737.1	0.974965
cds-WP_005240884.1	1		cds-WP_005240884.1	1		cds-WP_005247978.1	0.909706		cds-WP_005240884.1	1		cds-WP_005247836.1	0.685331		cds-WP_005252048.1	0.723557		cds-WP_005243916.1	0.974963
cds-WP_005240899.1	1		cds-WP_005240899.1	1		cds-WP_005250127.1	0.909615		cds-WP_005240899.1	1		cds-WP_005247842.1	0.685331		cds-WP_005245068.1	0.722848		cds-WP_005238953.1	0.974889
cds-WP_005240901.1	1		cds-WP_005240901.1	1		cds-WP_005239177.1	0.909543		cds-WP_005240901.1	1		cds-WP_005247891.1	0.685331		cds-WP_005239500.1	0.722468		cds-WP_005246233.1	0.974888
cds-WP_005240903.1	1		cds-WP_005240903.1	1		cds-WP_005244518.1	0.90954		cds-WP_005240903.1	1		cds-WP_005247951.1	0.685331		cds-WP_005250848.1	0.721905		cds-WP_025431648.1	0.974839
cds-WP_005240904.1	1		cds-WP_005240904.1	1		cds-WP_005237871.1	0.909513		cds-WP_005240904.1	1		cds-WP_005247973.1	0.685331		cds-WP_005573048.1	0.721014		cds-WP_005243022.1	0.974821
cds-WP_005240910.1	1		cds-WP_005240910.1	1		cds-WP_005249785.1	0.909451		cds-WP_005240910.1	1		cds-WP_005247983.1	0.685331		cds-WP_005563039.1	0.720955		cds-WP_005247806.1	0.974806
cds-WP_005240914.1	1		cds-WP_005240914.1	1		cds-WP_005243551.1	0.909406		cds-WP_005240914.1	1		cds-WP_005248022.1	0.685331		cds-WP_005250058.1	0.720802		cds-WP_005238398.1	0.974738
cds-WP_005240921.1	1		cds-WP_005240921.1	1		cds-WP_005244568.1	0.909398		cds-WP_005240921.1	1		cds-WP_005248044.1	0.685331		cds-WP_005251486.1	0.720251		cds-WP_005244010.1	0.974725
cds-WP_005240964.1	1		cds-WP_005240964.1	1		cds-WP_005248329.1	0.909311		cds-WP_005240964.1	1		cds-WP_005248166.1	0.685331		cds-WP_009478066.1	0.720064		cds-WP_005244614.1	0.974681
cds-WP_005240969.1	1		cds-WP_005240969.1	1		cds-WP_005251854.1	0.909281		cds-WP_005240969.1	1		cds-WP_005248168.1	0.685331		cds-WP_005244800.1	0.719888		cds-WP_005251473.1	0.974652
cds-WP_005240977.1	1		cds-WP_005240977.1	1		cds-WP_037179660.1	0.909256		cds-WP_005240977.1	1		cds-WP_005248181.1	0.685331		cds-WP_005247575.1	0.719881		cds-WP_025433189.1	0.974642
cds-WP_005240983.1	1		cds-WP_005240983.1	1		cds-WP_005252247.1	0.909186		cds-WP_005240983.1	1		cds-WP_005248199.1	0.685331		cds-WP_005250984.1	0.719858		cds-WP_005246094.1	0.974604
cds-WP_005240987.1	1		cds-WP_005240987.1	1		cds-WP_005244291.1	0.909147		cds-WP_005240987.1	1		cds-WP_005248464.1	0.685331		cds-WP_005250549.1	0.719853		cds-WP_005244603.1	0.974602
cds-WP_005240990.1	1		cds-WP_005240990.1	1		cds-WP_005240987.1	0.908986		cds-WP_005240990.1	1		cds-WP_005248582.1	0.685331		cds-WP_005249327.1	0.719606		cds-WP_005250457.1	0.974558
cds-WP_005240992.1	1		cds-WP_005240992.1	1		cds-WP_005248937.1	0.908972		cds-WP_005240992.1	1		cds-WP_005248615.1	0.685331		cds-WP_025432878.1	0.719429		cds-WP_025432819.1	0.974538
cds-WP_005240995.1	1		cds-WP_005240995.1	1		cds-WP_005238788.1	0.908853		cds-WP_005240995.1	1		cds-WP_005248619.1	0.685331		cds-WP_005248869.1	0.719424		cds-WP_005250003.1	0.974434
cds-WP_005240999.1	1		cds-WP_005240999.1	1		cds-WP_025433504.1	0.908757		cds-WP_005240999.1	1		cds-WP_005248631.1	0.685331		cds-WP_005238506.1	0.718975		cds-WP_005239818.1	0.974419
cds-WP_005241002.1	1		cds-WP_005241002.1	1		cds-WP_005238269.1	0.908636		cds-WP_005241002.1	1		cds-WP_005248636.1	0.685331		cds-K2Z90_RS12350	0.718942		cds-WP_005250039.1	0.974384
cds-WP_005241006.1	1		cds-WP_005241006.1	1		cds-WP_005244137.1	0.908393		cds-WP_005241006.1	1		cds-WP_005248661.1	0.685331		cds-WP_005250799.1	0.718868		cds-WP_005573961.1	0.974382
cds-WP_005241014.1	1		cds-WP_005241014.1	1		cds-WP_025432607.1	0.908373		cds-WP_005241014.1	1		cds-WP_005248663.1	0.685331		cds-WP_005241600.1	0.718842		cds-WP_005240899.1	0.974325
cds-WP_005241020.1	1		cds-WP_005241020.1	1		cds-WP_005244775.1	0.908244		cds-WP_005241020.1	1		cds-WP_005248702.1	0.685331		cds-WP_005238510.1	0.718772		cds-WP_025432884.1	0.974318
cds-WP_005241026.1	1		cds-WP_005241026.1	1		cds-WP_005248181.1	0.908213		cds-WP_005241026.1	1		cds-WP_005248746.1	0.685331		cds-WP_025433135.1	0.718587		cds-WP_005566498.1	0.974312
cds-WP_005241028.1	1		cds-WP_005241028.1	1		cds-WP_037182762.1	0.908108		cds-WP_005241028.1	1		cds-WP_005248769.1	0.685331		cds-K2Z90_RS01455	0.718452		cds-WP_005240486.1	0.974299
cds-WP_005241030.1	1		cds-WP_005241030.1	1		cds-WP_005246094.1	0.908077		cds-WP_005241030.1	1		cds-WP_005248783.1	0.685331		cds-WP_226955541.1	0.718451		cds-WP_005244553.1	0.974265
cds-WP_005241036.1	1		cds-WP_005241036.1	1		cds-WP_025433575.1	0.907811		cds-WP_005241036.1	1		cds-WP_005248794.1	0.685331		cds-WP_025431908.1	0.718005		cds-WP_037181713.1	0.974204
cds-WP_005241207.1	1		cds-WP_005241207.1	1		cds-WP_025432519.1	0.907229		cds-WP_005241207.1	1		cds-WP_005248818.1	0.685331		cds-WP_005244150.1	0.717933		cds-WP_025432841.1	0.974177
cds-WP_005241270.1	1		cds-WP_005241270.1	1		cds-WP_005243112.1	0.907212		cds-WP_005241270.1	1		cds-WP_005248889.1	0.685331		cds-WP_005239304.1	0.717819		cds-WP_005243031.1	0.974041
cds-WP_005241311.1	1		cds-WP_005241311.1	1		cds-WP_005238594.1	0.907205		cds-WP_005241311.1	1		cds-WP_005248928.1	0.685331		cds-WP_005240786.1	0.717728		cds-WP_025432406.1	0.974025
cds-WP_005241348.1	1		cds-WP_005241348.1	1		cds-WP_005251830.1	0.907138		cds-WP_005241348.1	1		cds-WP_005248932.1	0.685331		cds-WP_025433266.1	0.717486		cds-WP_005252683.1	0.973928
cds-WP_005241358.1	1		cds-WP_005241358.1	1		cds-WP_005240049.1	0.906978		cds-WP_005241358.1	1		cds-WP_005248943.1	0.685331		cds-WP_005252955.1	0.717474		cds-WP_025433611.1	0.973922
cds-WP_005241365.1	1		cds-WP_005241365.1	1		cds-WP_025433642.1	0.906837		cds-WP_005241365.1	1		cds-WP_005249071.1	0.685331		cds-WP_025433125.1	0.717319		cds-WP_025433025.1	0.973918
cds-WP_005241367.1	1		cds-WP_005241367.1	1		cds-WP_005238766.1	0.906762		cds-WP_005241367.1	1		cds-WP_005249083.1	0.685331		cds-WP_005240983.1	0.716244		cds-WP_005249140.1	0.973904
cds-WP_005241386.1	1		cds-WP_005241386.1	1		cds-WP_025433106.1	0.906532		cds-WP_005241386.1	1		cds-WP_005249110.1	0.685331		cds-WP_005242172.1	0.71597		cds-WP_025432101.1	0.973894
cds-WP_005241412.1	1		cds-WP_005241412.1	1		cds-WP_005246070.1	0.90651		cds-WP_005241412.1	1		cds-WP_005249123.1	0.685331		cds-WP_005240477.1	0.715867		cds-WP_005249618.1	0.973883
cds-WP_005241413.1	1		cds-WP_005241413.1	1		cds-WP_005240440.1	0.906447		cds-WP_005241413.1	1		cds-WP_005249180.1	0.685331		cds-WP_025432568.1	0.715478		cds-WP_005251013.1	0.973878
cds-WP_005241600.1	1		cds-WP_005241600.1	1		cds-WP_005245024.1	0.906442		cds-WP_005241600.1	1		cds-WP_005249197.1	0.685331		cds-WP_005238941.1	0.715352		cds-WP_005249972.1	0.973844
cds-WP_005241606.1	1		cds-WP_005241606.1	1		cds-WP_005244523.1	0.906021		cds-WP_005241606.1	1		cds-WP_005249200.1	0.685331		cds-WP_025431734.1	0.715292		cds-WP_005244735.1	0.973709
cds-WP_005241608.1	1		cds-WP_005241608.1	1		cds-WP_005247817.1	0.905938		cds-WP_005241608.1	1		cds-WP_005249213.1	0.685331		cds-WP_005242388.1	0.714999		cds-WP_025433610.1	0.973681
cds-WP_005241654.1	1		cds-WP_005241654.1	1		cds-WP_005238596.1	0.905694		cds-WP_005241654.1	1		cds-WP_005249266.1	0.685331		cds-WP_025431785.1	0.714992		cds-WP_005252172.1	0.973676
cds-WP_005241656.1	1		cds-WP_005241656.1	1		cds-WP_005250797.1	0.905585		cds-WP_005241656.1	1		cds-WP_005249308.1	0.685331		cds-WP_005248077.1	0.714872		cds-WP_025433576.1	0.973658
cds-WP_005241678.1	1		cds-WP_005241678.1	1		cds-K2Z90_RS12980	0.905542		cds-WP_005241678.1	1		cds-WP_005249312.1	0.685331		cds-WP_025432853.1	0.714857		cds-WP_005243760.1	0.973645
cds-WP_005241711.1	1		cds-WP_005241711.1	1		cds-WP_005246087.1	0.905445		cds-WP_005241711.1	1		cds-WP_005249767.1	0.685331		cds-WP_167344068.1	0.714414		cds-WP_005248846.1	0.973638
cds-WP_005241721.1	1		cds-WP_005241721.1	1		cds-WP_005243692.1	0.905388		cds-WP_005241721.1	1		cds-WP_005249840.1	0.685331		cds-WP_005239073.1	0.714304		cds-WP_025432828.1	0.973543
cds-WP_005241766.1	1		cds-WP_005241766.1	1		cds-WP_005250847.1	0.905299		cds-WP_005241766.1	1		cds-WP_005249981.1	0.685331		cds-WP_005251302.1	0.714224		cds-WP_025432052.1	0.973515
cds-WP_005241784.1	1		cds-WP_005241784.1	1		cds-WP_025431763.1	0.905171		cds-WP_005241784.1	1		cds-WP_005250055.1	0.685331		cds-WP_025433088.1	0.714173		cds-WP_025432351.1	0.97348
cds-WP_005241787.1	1		cds-WP_005241787.1	1		cds-WP_005239390.1	0.905094		cds-WP_005241787.1	1		cds-WP_005250071.1	0.685331		cds-WP_005248610.1	0.714162		cds-WP_005252070.1	0.973448
cds-WP_005241800.1	1		cds-WP_005241800.1	1		cds-WP_005244691.1	0.905093		cds-WP_005241800.1	1		cds-WP_005250080.1	0.685331		cds-WP_005252863.1	0.713961		cds-WP_005247681.1	0.973406
cds-WP_005241810.1	1		cds-WP_005241810.1	1		cds-WP_005244000.1	0.904834		cds-WP_005241810.1	1		cds-WP_005250288.1	0.685331		cds-WP_005251205.1	0.713559		cds-WP_005251358.1	0.9734
cds-WP_005241813.1	1		cds-WP_005241813.1	1		cds-WP_005251056.1	0.904762		cds-WP_005241813.1	1		cds-WP_005250491.1	0.685331		cds-WP_005242363.1	0.713402		cds-WP_005243846.1	0.973393
cds-WP_005241821.1	1		cds-WP_005241821.1	1		cds-WP_226955804.1	0.904527		cds-WP_005241821.1	1		cds-WP_005250543.1	0.685331		cds-WP_005246409.1	0.712935		cds-WP_005244608.1	0.973384
cds-WP_005241837.1	1		cds-WP_005241837.1	1		cds-WP_005249079.1	0.904389		cds-WP_005241837.1	1		cds-WP_005250759.1	0.685331		cds-WP_005247957.1	0.712755		cds-WP_005243094.1	0.973267
cds-WP_005241841.1	1		cds-WP_005241841.1	1		cds-WP_005244612.1	0.904373		cds-WP_005241841.1	1		cds-WP_005250799.1	0.685331		cds-WP_037179847.1	0.712459		cds-WP_005251935.1	0.973212
cds-WP_005241862.1	1		cds-WP_005241862.1	1		cds-WP_005250533.1	0.904273		cds-WP_005241862.1	1		cds-WP_005250809.1	0.685331		cds-WP_005238935.1	0.712284		cds-WP_005252881.1	0.973182
cds-WP_005241863.1	1		cds-WP_005241863.1	1		cds-WP_005237760.1	0.904027		cds-WP_005241863.1	1		cds-WP_005250931.1	0.685331		cds-WP_005247930.1	0.711368		cds-WP_025432868.1	0.973101
cds-WP_005241880.1	1		cds-WP_005241880.1	1		cds-WP_043943640.1	0.903789		cds-WP_005241880.1	1		cds-WP_005250984.1	0.685331		cds-WP_025433058.1	0.710733		cds-WP_005252334.1	0.97308
cds-WP_005241881.1	1		cds-WP_005241881.1	1		cds-WP_005570063.1	0.903772		cds-WP_005241881.1	1		cds-WP_005250998.1	0.685331		cds-WP_005239773.1	0.710269		cds-WP_005252827.1	0.973068
cds-WP_005242052.1	1		cds-WP_005242052.1	1		cds-WP_005244859.1	0.903718		cds-WP_005242052.1	1		cds-WP_005251010.1	0.685331		cds-WP_005251771.1	0.709464		cds-WP_005237867.1	0.972773
cds-WP_005242115.1	1		cds-WP_005242115.1	1		cds-WP_025432929.1	0.903637		cds-WP_005242115.1	1		cds-WP_005251080.1	0.685331		cds-WP_005252514.1	0.709347		cds-WP_005244337.1	0.972739
cds-WP_005242116.1	1		cds-WP_005242116.1	1		cds-WP_005251654.1	0.903616		cds-WP_005242116.1	1		cds-WP_005251248.1	0.685331		cds-WP_005248092.1	0.709152		cds-WP_005238791.1	0.972734
cds-WP_005242124.1	1		cds-WP_005242124.1	1		cds-WP_025433059.1	0.9035		cds-WP_005242124.1	1		cds-WP_005251258.1	0.685331		cds-K2Z90_RS14230	0.709111		cds-WP_005243158.1	0.972682
cds-WP_005242130.1	1		cds-WP_005242130.1	1		cds-WP_005240760.1	0.90347		cds-WP_005242130.1	1		cds-WP_005251269.1	0.685331		cds-WP_025433243.1	0.708749		cds-WP_005244598.1	0.972633
cds-WP_005242133.1	1		cds-WP_005242133.1	1		cds-WP_005244883.1	0.903465		cds-WP_005242133.1	1		cds-WP_005251270.1	0.685331		cds-WP_005252231.1	0.708528		cds-WP_005249165.1	0.972607
cds-WP_005242135.1	1		cds-WP_005242135.1	1		cds-WP_005252456.1	0.903444		cds-WP_005242135.1	1		cds-WP_005251372.1	0.685331		cds-WP_025432383.1	0.70835		cds-WP_005240884.1	0.97258
cds-WP_005242145.1	1		cds-WP_005242145.1	1		cds-WP_005248476.1	0.903343		cds-WP_005242145.1	1		cds-WP_005251383.1	0.685331		cds-WP_005239752.1	0.707997		cds-WP_005252291.1	0.972509
cds-WP_005242149.1	1		cds-WP_005242149.1	1		cds-WP_005561362.1	0.903173		cds-WP_005242149.1	1		cds-WP_005251451.1	0.685331		cds-WP_005243822.1	0.707816		cds-WP_025432903.1	0.972485
cds-WP_005242153.1	1		cds-WP_005242153.1	1		cds-WP_005252922.1	0.902981		cds-WP_005242153.1	1		cds-WP_005251515.1	0.685331		cds-WP_226955684.1	0.707567		cds-WP_025433053.1	0.972452
cds-WP_005242172.1	1		cds-WP_005242172.1	1		cds-WP_005240749.1	0.902922		cds-WP_005242172.1	1		cds-WP_005251520.1	0.685331		cds-WP_005242573.1	0.707339		cds-WP_226955656.1	0.972418
cds-WP_005242355.1	1		cds-WP_005242355.1	1		cds-WP_025431648.1	0.902751		cds-WP_005242355.1	1		cds-WP_005251540.1	0.685331		cds-WP_037182564.1	0.707083		cds-WP_005252578.1	0.972369
cds-WP_005242359.1	1		cds-WP_005242359.1	1		cds-WP_005238388.1	0.90271		cds-WP_005242359.1	1		cds-WP_005251584.1	0.685331		cds-WP_005238976.1	0.706999		cds-WP_005252708.1	0.972368
cds-WP_005242362.1	1		cds-WP_005242362.1	1		cds-WP_005252930.1	0.9027		cds-WP_005242362.1	1		cds-WP_005251661.1	0.685331		cds-WP_005251282.1	0.706772		cds-WP_005252314.1	0.972347
cds-WP_005242363.1	1		cds-WP_005242363.1	1		cds-WP_005252752.1	0.902271		cds-WP_005242363.1	1		cds-WP_005251680.1	0.685331		cds-WP_005248719.1	0.706739		cds-K2Z90_RS15955	0.972312
cds-WP_005242367.1	1		cds-WP_005242367.1	1		cds-WP_005243204.1	0.902045		cds-WP_005242367.1	1		cds-WP_005251693.1	0.685331		cds-WP_025432391.1	0.706684		cds-WP_005251586.1	0.972311
cds-WP_005242369.1	1		cds-WP_005242369.1	1		cds-WP_025431739.1	0.901913		cds-WP_005242369.1	1		cds-WP_005251699.1	0.685331		cds-WP_005252783.1	0.706609		cds-WP_005252671.1	0.972285
cds-WP_005242371.1	1		cds-WP_005242371.1	1		cds-WP_264297272.1	0.901614		cds-WP_005242371.1	1		cds-WP_005251754.1	0.685331		cds-WP_005240781.1	0.705443		cds-WP_226955799.1	0.972233
cds-WP_005242373.1	1		cds-WP_005242373.1	1		cds-WP_025433248.1	0.901605		cds-WP_005242373.1	1		cds-WP_005251829.1	0.685331		cds-WP_005248701.1	0.705221		cds-WP_005244305.1	0.972009
cds-WP_005242382.1	1		cds-WP_005242382.1	1		cds-WP_005248607.1	0.901515		cds-WP_005242382.1	1		cds-WP_005251876.1	0.685331		cds-WP_005242369.1	0.704718		cds-WP_005251758.1	0.971714
cds-WP_005242384.1	1		cds-WP_005242384.1	1		cds-WP_005247916.1	0.901302		cds-WP_005242384.1	1		cds-WP_005251984.1	0.685331		cds-WP_005240336.1	0.704706		cds-WP_005251099.1	0.971658
cds-WP_005242388.1	1		cds-WP_005242388.1	1		cds-WP_005248013.1	0.90127		cds-WP_005242388.1	1		cds-WP_005252033.1	0.685331		cds-WP_025431940.1	0.704593		cds-WP_005240312.1	0.971653
cds-WP_005242408.1	1		cds-WP_005242408.1	1		cds-WP_005247733.1	0.900999		cds-WP_005242408.1	1		cds-WP_005252048.1	0.685331		cds-WP_005240440.1	0.704324		cds-WP_226955678.1	0.971513
cds-WP_005242413.1	1		cds-WP_005242413.1	1		cds-WP_025433010.1	0.900987		cds-WP_005242413.1	1		cds-WP_005252073.1	0.685331		cds-WP_025431800.1	0.704278		cds-WP_226955728.1	0.971478
cds-WP_005242495.1	1		cds-WP_005242495.1	1		cds-WP_005248141.1	0.900905		cds-WP_005242495.1	1		cds-WP_005252077.1	0.685331		cds-WP_025432540.1	0.703468		cds-WP_025433129.1	0.97147
cds-WP_005242722.1	1		cds-WP_005242722.1	1		cds-WP_043943777.1	0.900764		cds-WP_005242722.1	1		cds-WP_005252082.1	0.685331		cds-WP_005238448.1	0.703273		cds-WP_005243624.1	0.971365
cds-WP_005242725.1	1		cds-WP_005242725.1	1		cds-WP_005247770.1	0.900754		cds-WP_005242725.1	1		cds-WP_005252132.1	0.685331		cds-WP_005248709.1	0.703253		cds-WP_005244224.1	0.971317
cds-WP_005242751.1	1		cds-WP_005242751.1	1		cds-WP_005242967.1	0.900753		cds-WP_005242751.1	1		cds-WP_005252150.1	0.685331		cds-WP_005252940.1	0.703143		cds-WP_005251370.1	0.971307
cds-WP_005242753.1	1		cds-WP_005242753.1	1		cds-WP_005248628.1	0.900668		cds-WP_005242753.1	1		cds-WP_005252275.1	0.685331		cds-WP_005240853.1	0.703099		cds-WP_005237832.1	0.971283
cds-WP_005242798.1	1		cds-WP_005242798.1	1		cds-WP_005248048.1	0.900488		cds-WP_005242798.1	1		cds-WP_005252280.1	0.685331		cds-WP_005247390.1	0.703093		cds-WP_025433051.1	0.971184
cds-WP_005242824.1	1		cds-WP_005242824.1	1		cds-WP_005244942.1	0.900371		cds-WP_005242824.1	1		cds-WP_005252368.1	0.685331		cds-WP_025431628.1	0.70296		cds-WP_009474702.1	0.971119
cds-WP_005242826.1-2	1		cds-WP_005242826.1-2	1		cds-WP_005250766.1	0.900211		cds-WP_005242826.1-2	1		cds-WP_005252377.1	0.685331		cds-WP_005252569.1	0.702941		cds-WP_005238107.1	0.971102
cds-WP_005242845.1	1		cds-WP_005242845.1	1		cds-WP_005244976.1	0.900156		cds-WP_005242845.1	1		cds-WP_005252390.1	0.685331		cds-WP_025431775.1	0.702756		cds-WP_005252414.1	0.971094
cds-WP_005242907.1	1		cds-WP_005242907.1	1		cds-WP_005240192.1	0.900148		cds-WP_005242907.1	1		cds-WP_005252471.1	0.685331		cds-WP_025432554.1	0.702632		cds-WP_005240313.1	0.971085
cds-WP_005242937.1	1		cds-WP_005242937.1	1		cds-WP_025433212.1	0.900085		cds-WP_005242937.1	1		cds-WP_005252473.1	0.685331		cds-WP_005248116.1	0.70261		cds-WP_005259626.1	0.971075
cds-WP_005242938.1	1		cds-WP_005242938.1	1		cds-WP_226955748.1	0.900015		cds-WP_005242938.1	1		cds-WP_005252482.1	0.685331		cds-WP_005239508.1	0.702306		cds-WP_005238799.1	0.971067
cds-WP_005242940.1	1		cds-WP_005242940.1	1		cds-WP_025432544.1	0.899885		cds-WP_005242940.1	1		cds-WP_005252524.1	0.685331		cds-WP_005561362.1	0.701301		cds-WP_005252069.1	0.971057
cds-WP_005242946.1	1		cds-WP_005242946.1	1		cds-WP_025433074.1	0.899807		cds-WP_005242946.1	1		cds-WP_005252551.1	0.685331		cds-WP_005243810.1	0.700797		cds-WP_025431947.1	0.971022
cds-WP_005242958.1	1		cds-WP_005242958.1	1		cds-WP_005243885.1	0.8998		cds-WP_005242958.1	1		cds-WP_005252674.1	0.685331		cds-WP_025431546.1	0.700412		cds-WP_005249065.1	0.970947
cds-WP_005242961.1	1		cds-WP_005242961.1	1		cds-WP_005243771.1	0.899511		cds-WP_005242961.1	1		cds-WP_005252838.1	0.685331		cds-WP_005248943.1	0.699628		cds-WP_005245014.1	0.970856
cds-WP_005242964.1	1		cds-WP_005242964.1	1		cds-WP_025432912.1	0.899487		cds-WP_005242964.1	1		cds-WP_005252856.1	0.685331		cds-WP_005245026.1	0.69894		cds-WP_005248613.1	0.970848
cds-WP_005242967.1	1		cds-WP_005242967.1	1		cds-WP_025431586.1	0.899034		cds-WP_005242967.1	1		cds-WP_005252872.1	0.685331		cds-WP_005252199.1	0.698667		cds-WP_005247606.1	0.970835
cds-WP_005242971.1	1		cds-WP_005242971.1	1		cds-WP_005251155.1	0.898976		cds-WP_005242971.1	1		cds-WP_005252874.1	0.685331		cds-WP_005244000.1	0.69861		cds-WP_037182698.1	0.970825
cds-WP_005242974.1	1		cds-WP_005242974.1	1		cds-WP_005244095.1	0.898864		cds-WP_005242974.1	1		cds-WP_005252894.1	0.685331		cds-WP_005248960.1	0.698461		cds-WP_025432337.1	0.970744
cds-WP_005242980.1	1		cds-WP_005242980.1	1		cds-WP_003938068.1	0.898801		cds-WP_005242980.1	1		cds-WP_005252898.1	0.685331		cds-WP_005246210.1	0.697828		cds-WP_005244568.1	0.970695
cds-WP_005242982.1	1		cds-WP_005242982.1	1		cds-WP_005243767.1	0.898765		cds-WP_005242982.1	1		cds-WP_005252901.1	0.685331		cds-WP_005249239.1	0.697774		cds-WP_005252825.1	0.970663
cds-WP_005243006.1	1		cds-WP_005243006.1	1		cds-WP_005251368.1	0.898699		cds-WP_005243006.1	1		cds-WP_005252909.1	0.685331		cds-WP_080578206.1	0.697127		cds-WP_025432533.1	0.970644
cds-WP_005243009.1	1		cds-WP_005243009.1	1		cds-WP_025433073.1	0.898609		cds-WP_005243009.1	1		cds-WP_005252940.1	0.685331		cds-WP_005246656.1	0.696771		cds-WP_005240016.1	0.97062
cds-WP_005243010.1	1		cds-WP_005243010.1	1		cds-WP_005239314.1	0.898556		cds-WP_005243010.1	1		cds-WP_005252943.1	0.685331		cds-WP_005244579.1	0.696443		cds-WP_005240559.1	0.970615
cds-WP_005243022.1	1		cds-WP_005243022.1	1		cds-WP_005249320.1	0.898476		cds-WP_005243022.1	1		cds-WP_005255533.1	0.685331		cds-WP_005243559.1	0.696236		cds-WP_025431883.1	0.970428
cds-WP_005243031.1	1		cds-WP_005243031.1	1		cds-WP_005251758.1	0.898242		cds-WP_005243031.1	1		cds-WP_005258203.1	0.685331		cds-WP_005240533.1	0.695849		cds-WP_005238264.1	0.970393
cds-WP_005243035.1	1		cds-WP_005243035.1	1		cds-WP_005238892.1	0.898136		cds-WP_005243035.1	1		cds-WP_005258384.1	0.685331		cds-WP_005243098.1	0.695593		cds-WP_005250987.1	0.970363
cds-WP_005243040.1	1		cds-WP_005243040.1	1		cds-K2Z90_RS02765	0.898096		cds-WP_005243040.1	1		cds-WP_005261100.1	0.685331		cds-WP_005243070.1	0.695469		cds-WP_005242974.1	0.970184
cds-WP_005243050.1	1		cds-WP_005243050.1	1		cds-WP_025433235.1	0.898092		cds-WP_005243050.1	1		cds-WP_005570063.1	0.685331		cds-WP_025432183.1	0.694866		cds-WP_025431898.1	0.970117
cds-WP_005243052.1	1		cds-WP_005243052.1	1		cds-WP_005246353.1	0.897862		cds-WP_005243052.1	1		cds-WP_007300914.1	0.685331		cds-WP_025433628.1	0.694227		cds-WP_025432381.1	0.970116
cds-WP_005243054.1	1		cds-WP_005243054.1	1		cds-WP_005247649.1	0.897804		cds-WP_005243054.1	1		cds-WP_009478121.1	0.685331		cds-WP_005238409.1	0.694168		cds-WP_005252775.1	0.970115
cds-WP_005243056.1	1		cds-WP_005243056.1	1		cds-WP_005244981.1	0.897783		cds-WP_005243056.1	1		cds-WP_011596917.1	0.685331		cds-WP_005240394.1	0.693549		cds-WP_005238585.1	0.970065
cds-WP_005243060.1	1		cds-WP_005243060.1	1		cds-WP_005251372.1	0.897535		cds-WP_005243060.1	1		cds-WP_025431558.1	0.685331		cds-WP_005247840.1	0.693421		cds-WP_005244642.1	0.970048
cds-WP_005243068.1	1		cds-WP_005243068.1	1		cds-WP_005252291.1	0.897418		cds-WP_005243068.1	1		cds-WP_025431570.1	0.685331		cds-WP_005248810.1	0.692839		cds-WP_005252524.1	0.969921
cds-WP_005243071.1	1		cds-WP_005243071.1	1		cds-WP_005246399.1	0.897201		cds-WP_005243071.1	1		cds-WP_025431586.1	0.685331		cds-WP_005239429.1	0.692802		cds-WP_005239793.1	0.969863
cds-WP_005243077.1	1		cds-WP_005243077.1	1		cds-WP_005240765.1	0.897141		cds-WP_005243077.1	1		cds-WP_025431619.1	0.685331		cds-WP_005251801.1	0.692527		cds-WP_005251538.1	0.969837
cds-WP_005243086.1	1		cds-WP_005243086.1	1		cds-WP_005251902.1	0.897086		cds-WP_005243086.1	1		cds-WP_025431633.1	0.685331		cds-WP_005252443.1	0.692285		cds-WP_005244088.1	0.969829
cds-WP_005243092.1	1		cds-WP_005243092.1	1		cds-WP_025431594.1	0.897012		cds-WP_005243092.1	1		cds-WP_025431634.1	0.685331		cds-WP_005248845.1	0.692056		cds-WP_025431638.1	0.969822
cds-WP_005243103.1	1		cds-WP_005243103.1	1		cds-WP_005248900.1	0.896935		cds-WP_005243103.1	1		cds-WP_025431671.1	0.685331		cds-WP_005249320.1	0.69169		cds-WP_005252339.1	0.96979
cds-WP_005243104.1	1		cds-WP_005243104.1	1		cds-WP_005252355.1	0.896843		cds-WP_005243104.1	1		cds-WP_025431674.1	0.685331		cds-WP_025432979.1	0.691659		cds-WP_005261420.1	0.969771
cds-WP_005243110.1	1		cds-WP_005243110.1	1		cds-WP_005243887.1	0.896798		cds-WP_005243110.1	1		cds-WP_025431679.1	0.685331		cds-WP_005239434.1	0.691365		cds-WP_025431917.1	0.969725
cds-WP_005243112.1	1		cds-WP_005243112.1	1		cds-WP_025431635.1	0.89667		cds-WP_005243112.1	1		cds-WP_025431765.1	0.685331		cds-WP_025432130.1	0.69132		cds-WP_025431650.1	0.969661
cds-WP_005243124.1	1		cds-WP_005243124.1	1		cds-WP_005248485.1	0.896206		cds-WP_005243124.1	1		cds-WP_025431770.1	0.685331		cds-WP_005240799.1	0.691204		cds-WP_005570063.1	0.969584
cds-WP_005243126.1	1		cds-WP_005243126.1	1		cds-WP_005240338.1	0.895843		cds-WP_005243126.1	1		cds-WP_025431775.1	0.685331		cds-WP_005237759.1	0.691157		cds-WP_005251356.1	0.969527
cds-WP_005243130.1	1		cds-WP_005243130.1	1		cds-WP_005248166.1	0.895762		cds-WP_005243130.1	1		cds-WP_025431777.1	0.685331		cds-WP_005248897.1	0.691046		cds-WP_005244430.1	0.969501
cds-WP_005243139.1	1		cds-WP_005243139.1	1		cds-WP_226955656.1	0.895697		cds-WP_005243139.1	1		cds-WP_025431884.1	0.685331		cds-WP_005244673.1	0.69063		cds-WP_005251728.1	0.969478
cds-WP_005243141.1	1		cds-WP_005243141.1	1		cds-WP_226955606.1	0.895652		cds-WP_005243141.1	1		cds-WP_025431907.1	0.685331		cds-WP_005251916.1	0.690501		cds-WP_025431658.1	0.969441
cds-WP_005243144.1	1		cds-WP_005243144.1	1		cds-WP_005251046.1	0.895554		cds-WP_005243144.1	1		cds-WP_025431917.1	0.685331		cds-WP_005240001.1	0.690361		cds-WP_005244206.1	0.969377
cds-WP_005243149.1	1		cds-WP_005243149.1	1		cds-WP_025432307.1	0.895523		cds-WP_005243149.1	1		cds-WP_025431926.1	0.685331		cds-WP_003940763.1	0.690336		cds-WP_005240011.1	0.969363
cds-WP_005243155.1	1		cds-WP_005243155.1	1		cds-WP_043943921.1	0.894907		cds-WP_005243155.1	1		cds-WP_025431928.1	0.685331		cds-WP_009478121.1	0.689952		cds-WP_005238613.1	0.969332
cds-WP_005243157.1	1		cds-WP_005243157.1	1		cds-WP_005251799.1	0.894759		cds-WP_005243157.1	1		cds-WP_025431941.1	0.685331		cds-WP_025433054.1	0.689852		cds-WP_005243649.1	0.969239
cds-WP_005243158.1	1		cds-WP_005243158.1	1		cds-WP_005238724.1	0.894737		cds-WP_005243158.1	1		cds-WP_025431997.1	0.685331		cds-WP_025431907.1	0.689777		cds-WP_005246224.1	0.969223
cds-WP_005243169.1	1		cds-WP_005243169.1	1		cds-WP_005241207.1	0.894663		cds-WP_005243169.1	1		cds-WP_025432084.1	0.685331		cds-WP_005239823.1	0.689542		cds-WP_025432204.1	0.969216
cds-WP_005243170.1	1		cds-WP_005243170.1	1		cds-WP_226955668.1	0.894655		cds-WP_005243170.1	1		cds-WP_025432089.1	0.685331		cds-WP_005250288.1	0.689515		cds-WP_025432911.1	0.969159
cds-WP_005243171.1	1		cds-WP_005243171.1	1		cds-WP_005242172.1	0.894427		cds-WP_005243171.1	1		cds-WP_025432107.1	0.685331		cds-WP_005250933.1	0.689191		cds-WP_025432985.1	0.969157
cds-WP_005243187.1	1		cds-WP_005243187.1	1		cds-K2Z90_RS23990	0.894427		cds-WP_005243187.1	1		cds-WP_025432111.1	0.685331		cds-WP_005248776.1	0.688686		cds-WP_025431601.1	0.969077
cds-WP_005243189.1	1		cds-WP_005243189.1	1		cds-WP_005250910.1	0.894427		cds-WP_005243189.1	1		cds-WP_025432169.1	0.685331		cds-WP_025433341.1	0.688339		cds-K2Z90_RS31845	0.969023
cds-WP_005243204.1	1		cds-WP_005243204.1	1		cds-WP_005252847.1	0.894427		cds-WP_005243204.1	1		cds-WP_025432176.1	0.685331		cds-WP_005239658.1	0.688325		cds-WP_005238620.1	0.969019
cds-WP_005243467.1	1		cds-WP_005243467.1	1		cds-WP_025432621.1	0.894427		cds-WP_005243467.1	1		cds-WP_025432217.1	0.685331		cds-K2Z90_RS12370	0.6883		cds-WP_005250127.1	0.968997
cds-WP_005243468.1	1		cds-WP_005243468.1	1		cds-WP_005251699.1	0.894385		cds-WP_005243468.1	1		cds-WP_025432281.1	0.685331		cds-WP_025432111.1	0.68795		cds-WP_037178950.1	0.96898
cds-WP_005243473.1	1		cds-WP_005243473.1	1		cds-WP_005238995.1	0.894352		cds-WP_005243473.1	1		cds-WP_025432284.1	0.685331		cds-WP_005246650.1	0.687839		cds-WP_025433060.1	0.968891
cds-WP_005243474.1	1		cds-WP_005243474.1	1		cds-WP_005244726.1	0.894344		cds-WP_005243474.1	1		cds-WP_025432315.1	0.685331		cds-WP_005239789.1	0.687801		cds-WP_005243149.1	0.96888
cds-WP_005243492.1	1		cds-WP_005243492.1	1		cds-WP_005238872.1	0.894291		cds-WP_005243492.1	1		cds-WP_025432344.1	0.685331		cds-WP_043943782.1	0.687786		cds-WP_005240767.1	0.968832
cds-WP_005243533.1	1		cds-WP_005243533.1	1		cds-WP_005259110.1	0.894169		cds-WP_005243533.1	1		cds-WP_025432363.1	0.685331		cds-WP_226955658.1	0.687417		cds-WP_005238284.1	0.968783
cds-WP_005243547.1	1		cds-WP_005243547.1	1		cds-WP_005262890.1	0.894028		cds-WP_005243547.1	1		cds-WP_025432385.1	0.685331		cds-WP_005250550.1	0.687156		cds-WP_005249627.1	0.968732
cds-WP_005243551.1	1		cds-WP_005243551.1	1		cds-WP_005248868.1	0.893963		cds-WP_005243551.1	1		cds-WP_025432400.1	0.685331		cds-WP_025433299.1	0.686909		cds-WP_005244312.1	0.968524
cds-WP_005243581.1	1		cds-WP_005243581.1	1		cds-WP_226955683.1	0.893935		cds-WP_005243581.1	1		cds-WP_025432461.1	0.685331		cds-WP_005238748.1	0.686454		cds-WP_005237834.1	0.96852
cds-WP_005243585.1	1		cds-WP_005243585.1	1		cds-WP_187300232.1	0.893739		cds-WP_005243585.1	1		cds-WP_025432525.1	0.685331		cds-WP_005240286.1	0.686208		cds-WP_025431920.1	0.968468
cds-WP_005243590.1	1		cds-WP_005243590.1	1		cds-WP_025432063.1	0.893737		cds-WP_005243590.1	1		cds-WP_025432531.1	0.685331		cds-WP_005246379.1	0.686009		cds-WP_005247888.1	0.96842
cds-WP_005243597.1	1		cds-WP_005243597.1	1		cds-WP_025433060.1	0.893714		cds-WP_005243597.1	1		cds-WP_025432540.1	0.685331		cds-WP_005249103.1	0.685927		cds-WP_005240901.1	0.968394
cds-WP_005243605.1	1		cds-WP_005243605.1	1		cds-WP_005249134.1	0.8936		cds-WP_005243605.1	1		cds-WP_025432547.1	0.685331		cds-WP_005242413.1	0.685725		cds-WP_005250574.1	0.968381
cds-WP_005243623.1	1		cds-WP_005243623.1	1		cds-WP_025432152.1	0.893554		cds-WP_005243623.1	1		cds-WP_025432557.1	0.685331		cds-WP_005244066.1	0.685575		cds-WP_037178959.1	0.968349
cds-WP_005243625.1	1		cds-WP_005243625.1	1		cds-WP_005246502.1	0.893478		cds-WP_005243625.1	1		cds-WP_025432627.1	0.685331		cds-WP_005248913.1	0.685201		cds-WP_005238794.1	0.968346
cds-WP_005243633.1	1		cds-WP_005243633.1	1		cds-WP_005251827.1	0.893459		cds-WP_005243633.1	1		cds-WP_025432672.1	0.685331		cds-WP_005238358.1	0.685134		cds-WP_005240957.1	0.96818
cds-WP_005243643.1	1		cds-WP_005243643.1	1		cds-WP_005238605.1	0.893447		cds-WP_005243643.1	1		cds-WP_025432674.1	0.685331		cds-WP_005240047.1	0.684921		cds-WP_025431953.1	0.96817
cds-WP_005243645.1	1		cds-WP_005243645.1	1		cds-WP_005241036.1	0.893414		cds-WP_005243645.1	1		cds-WP_025432724.1	0.685331		cds-WP_005238740.1	0.684472		cds-WP_025433427.1	0.968097
cds-WP_005243649.1	1		cds-WP_005243649.1	1		cds-WP_179443392.1	0.893208		cds-WP_005243649.1	1		cds-WP_025432740.1	0.685331		cds-WP_005248278.1	0.683841		cds-WP_037181792.1	0.968095
cds-WP_005243653.1	1		cds-WP_005243653.1	1		cds-WP_025431818.1	0.893205		cds-WP_005243653.1	1		cds-WP_025432852.1	0.685331		cds-K2Z90_RS19560	0.68364		cds-WP_005252381.1	0.968061
cds-WP_005243655.1	1		cds-WP_005243655.1	1		cds-WP_025432845.1	0.893156		cds-WP_005243655.1	1		cds-WP_025432905.1	0.685331		cds-K2Z90_RS19960	0.68364		cds-WP_005247770.1	0.968021
cds-WP_005243657.1	1		cds-WP_005243657.1	1		cds-WP_025432986.1	0.89284		cds-WP_005243657.1	1		cds-WP_025432908.1	0.685331		cds-K2Z90_RS32175	0.68364		cds-WP_005250077.1	0.96798
cds-WP_005243684.1	1		cds-WP_005243684.1	1		cds-WP_005259626.1	0.892799		cds-WP_005243684.1	1		cds-WP_025432915.1	0.685331		cds-WP_005238091.1	0.68364		cds-WP_025431702.1	0.967951
cds-WP_005243692.1	1		cds-WP_005243692.1	1		cds-WP_005250559.1	0.892727		cds-WP_005243692.1	1		cds-WP_025432941.1	0.685331		cds-WP_005238095.1	0.68364		cds-WP_005240338.1	0.967937
cds-WP_005243696.1	1		cds-WP_005243696.1	1		cds-WP_226955526.1	0.892723		cds-WP_005243696.1	1		cds-WP_025432979.1	0.685331		cds-WP_005238231.1	0.68364		cds-WP_005252400.1	0.967919
cds-WP_005243714.1	1		cds-WP_005243714.1	1		cds-WP_025433009.1	0.892698		cds-WP_005243714.1	1		cds-WP_025433042.1	0.685331		cds-WP_005238445.1	0.68364		cds-WP_025433405.1	0.967887
cds-WP_005243718.1	1		cds-WP_005243718.1	1		cds-WP_005249207.1	0.892698		cds-WP_005243718.1	1		cds-WP_025433050.1	0.685331		cds-WP_005239665.1	0.68364		cds-WP_005252946.1	0.967834
cds-WP_005243719.1	1		cds-WP_005243719.1	1		cds-WP_005248797.1	0.892617		cds-WP_005243719.1	1		cds-WP_025433064.1	0.685331		cds-WP_005241454.1	0.68364		cds-WP_005251762.1	0.967814
cds-WP_005243722.1	1		cds-WP_005243722.1	1		cds-WP_025432363.1	0.892482		cds-WP_005243722.1	1		cds-WP_025433073.1	0.685331		cds-WP_005241572.1	0.68364		cds-WP_005251287.1	0.967788
cds-WP_005243729.1	1		cds-WP_005243729.1	1		cds-WP_005240884.1	0.892303		cds-WP_005243729.1	1		cds-WP_025433189.1	0.685331		cds-WP_005242380.1	0.68364		cds-WP_005248631.1	0.967763
cds-WP_005243738.1	1		cds-WP_005243738.1	1		cds-WP_005251207.1	0.892243		cds-WP_005243738.1	1		cds-WP_025433212.1	0.685331		cds-WP_005242562.1	0.68364		cds-WP_005244131.1	0.967628
cds-WP_005243754.1	1		cds-WP_005243754.1	1		cds-WP_025431997.1	0.892172		cds-WP_005243754.1	1		cds-WP_025433224.1	0.685331		cds-WP_005243046.1	0.68364		cds-WP_043943783.1	0.967583
cds-WP_005243756.1	1		cds-WP_005243756.1	1		cds-WP_005248914.1	0.892163		cds-WP_005243756.1	1		cds-WP_025433243.1	0.685331		cds-WP_005243670.1	0.68364		cds-WP_005240282.1	0.967545
cds-WP_005243760.1	1		cds-WP_005243760.1	1		cds-WP_226955699.1	0.891946		cds-WP_005243760.1	1		cds-WP_025433288.1	0.685331		cds-WP_005244266.1	0.68364		cds-WP_005244349.1	0.967385
cds-WP_005243762.1	1		cds-WP_005243762.1	1		cds-WP_005243856.1	0.891836		cds-WP_005243762.1	1		cds-WP_025433337.1	0.685331		cds-WP_005244421.1	0.68364		cds-WP_025431903.1	0.96722
cds-WP_005243767.1	1		cds-WP_005243767.1	1		cds-WP_025431890.1	0.891809		cds-WP_005243767.1	1		cds-WP_025433391.1	0.685331		cds-WP_005244434.1	0.68364		cds-WP_005243585.1	0.967209
cds-WP_005243769.1	1		cds-WP_005243769.1	1		cds-WP_005243696.1	0.891696		cds-WP_005243769.1	1		cds-WP_025433399.1	0.685331		cds-WP_005244482.1	0.68364		cds-WP_005248527.1	0.96715
cds-WP_005243771.1	1		cds-WP_005243771.1	1		cds-WP_005250760.1	0.891693		cds-WP_005243771.1	1		cds-WP_025433403.1	0.685331		cds-WP_005244611.1	0.68364		cds-WP_179443155.1	0.967127
cds-WP_005243791.1	1		cds-WP_005243791.1	1		cds-WP_005247564.1	0.891659		cds-WP_005243791.1	1		cds-WP_025433504.1	0.685331		cds-WP_005246100.1	0.68364		cds-WP_005248938.1	0.967003
cds-WP_005243799.1	1		cds-WP_005243799.1	1		cds-WP_005251331.1	0.891594		cds-WP_005243799.1	1		cds-WP_025433598.1	0.685331		cds-WP_005246274.1	0.68364		cds-WP_005244751.1	0.966931
cds-WP_005243807.1	1		cds-WP_005243807.1	1		cds-WP_264297285.1	0.891334		cds-WP_005243807.1	1		cds-WP_025433606.1	0.685331		cds-WP_005246431.1	0.68364		cds-WP_005244880.1	0.966844
cds-WP_005243810.1	1		cds-WP_005243810.1	1		cds-WP_005252671.1	0.89132		cds-WP_005243810.1	1		cds-WP_025433639.1	0.685331		cds-WP_005246579.1	0.68364		cds-WP_005244597.1	0.966753
cds-WP_005243820.1	1		cds-WP_005243820.1	1		cds-WP_005248582.1	0.891025		cds-WP_005243820.1	1		cds-WP_025433644.1	0.685331		cds-WP_005246609.1	0.68364		cds-WP_025432222.1	0.966722
cds-WP_005243822.1	1		cds-WP_005243822.1	1		cds-WP_005252792.1	0.890971		cds-WP_005243822.1	1		cds-WP_025433789.1	0.685331		cds-WP_005246626.1	0.68364		cds-WP_025433172.1	0.966687
cds-WP_005243826.1	1		cds-WP_005243826.1	1		cds-WP_025432003.1	0.890971		cds-WP_005243826.1	1		cds-WP_037178969.1	0.685331		cds-WP_005248568.1	0.68364		cds-WP_005246527.1	0.96668
cds-WP_005243835.1	1		cds-WP_005243835.1	1		cds-WP_005238876.1	0.890966		cds-WP_005243835.1	1		cds-WP_037179094.1	0.685331		cds-WP_005248569.1	0.68364		cds-WP_005241006.1	0.966661
cds-WP_005243846.1	1		cds-WP_005243846.1	1		cds-K2Z90_RS41800	0.890745		cds-WP_005243846.1	1		cds-WP_037181317.1	0.685331		cds-WP_005249115.1	0.68364		cds-WP_005251382.1	0.966627
cds-WP_005243853.1	1		cds-WP_005243853.1	1		cds-WP_228380631.1	0.890729		cds-WP_005243853.1	1		cds-WP_037181550.1	0.685331		cds-WP_005249711.1	0.68364		cds-WP_005248476.1	0.966568
cds-WP_005243856.1	1		cds-WP_005243856.1	1		cds-WP_005240983.1	0.890707		cds-WP_005243856.1	1		cds-WP_037181684.1	0.685331		cds-WP_005249983.1	0.68364		cds-WP_005263839.1	0.966521
cds-WP_005243861.1	1		cds-WP_005243861.1	1		cds-WP_143767426.1	0.89064		cds-WP_005243861.1	1		cds-WP_037181763.1	0.685331		cds-WP_005250978.1	0.68364		cds-WP_043943634.1	0.966504
cds-WP_005243881.1	1		cds-WP_005243881.1	1		cds-WP_025431738.1	0.89063		cds-WP_005243881.1	1		cds-WP_037182782.1	0.685331		cds-WP_005251113.1	0.68364		cds-WP_005250477.1	0.966462
cds-WP_005243885.1	1		cds-WP_005243885.1	1		cds-WP_005244721.1	0.890521		cds-WP_005243885.1	1		cds-WP_037183109.1	0.685331		cds-WP_005251124.1	0.68364		cds-WP_005248607.1	0.96646
cds-WP_005243887.1	1		cds-WP_005243887.1	1		cds-WP_005243822.1	0.890319		cds-WP_005243887.1	1		cds-WP_043943777.1	0.685331		cds-WP_005251377.1	0.68364		cds-WP_005240158.1	0.966402
cds-WP_005243889.1	1		cds-WP_005243889.1	1		cds-WP_226955717.1	0.890308		cds-WP_005243889.1	1		cds-WP_043943780.1	0.685331		cds-WP_005252266.1	0.68364		cds-WP_025432158.1	0.966399
cds-WP_005243901.1	1		cds-WP_005243901.1	1		cds-WP_005244598.1	0.890251		cds-WP_005243901.1	1		cds-WP_061041700.1	0.685331		cds-WP_005252798.1	0.68364		cds-WP_025432335.1	0.966382
cds-WP_005243916.1	1		cds-WP_005243916.1	1		cds-WP_025432195.1	0.890161		cds-WP_005243916.1	1		cds-WP_061044208.1	0.685331		cds-WP_025431808.1	0.68364		cds-WP_005249213.1	0.966328
cds-WP_005243925.1	1		cds-WP_005243925.1	1		cds-WP_025432207.1	0.890069		cds-WP_005243925.1	1		cds-WP_061700406.1	0.685331		cds-WP_025432075.1	0.68364		cds-WP_005243157.1	0.966313
cds-WP_005243927.1	1		cds-WP_005243927.1	1		cds-WP_005244108.1	0.88983		cds-WP_005243927.1	1		cds-WP_085990781.1	0.685331		cds-WP_025432466.1	0.68364		cds-WP_005238418.1	0.966151
cds-WP_005243931.1	1		cds-WP_005243931.1	1		cds-WP_025432600.1	0.889799		cds-WP_005243931.1	1		cds-WP_143767543.1	0.685331		cds-WP_025432661.1	0.68364		cds-WP_005238822.1	0.966139
cds-WP_005243933.1	1		cds-WP_005243933.1	1		cds-WP_005242116.1	0.889695		cds-WP_005243933.1	1		cds-WP_179443301.1	0.685331		cds-WP_025432715.1	0.68364		cds-WP_025432851.1	0.966132
cds-WP_005243939.1	1		cds-WP_005243939.1	1		cds-WP_005251181.1	0.88953		cds-WP_005243939.1	1		cds-WP_187300146.1	0.685331		cds-WP_025432973.1	0.68364		cds-WP_025431770.1	0.966085
cds-WP_005243954.1	1		cds-WP_005243954.1	1		cds-WP_025432159.1	0.889482		cds-WP_005243954.1	1		cds-WP_187300234.1	0.685331		cds-WP_025433011.1	0.68364		cds-WP_005242967.1	0.966043
cds-WP_005243958.1	1		cds-WP_005243958.1	1		cds-WP_005244417.1	0.889354		cds-WP_005243958.1	1		cds-WP_226955497.1	0.685331		cds-WP_025433080.1	0.68364		cds-WP_025433136.1	0.966039
cds-WP_005243963.1	1		cds-WP_005243963.1	1		cds-WP_005249317.1	0.889105		cds-WP_005243963.1	1		cds-WP_226955547.1	0.685331		cds-WP_025433282.1	0.68364		cds-WP_005238792.1	0.965996
cds-WP_005243975.1	1		cds-WP_005243975.1	1		cds-WP_025433323.1	0.889088		cds-WP_005243975.1	1		cds-WP_226955581.1	0.685331		cds-WP_025433561.1	0.68364		cds-WP_005258596.1	0.965896
cds-WP_005243981.1	1		cds-WP_005243981.1	1		cds-WP_005237840.1	0.889001		cds-WP_005243981.1	1		cds-WP_226955606.1	0.685331		cds-WP_025433673.1	0.68364		cds-WP_025431586.1	0.965882
cds-WP_005243986.1	1		cds-WP_005243986.1	1		cds-WP_005247930.1	0.888871		cds-WP_005243986.1	1		cds-WP_226955669.1	0.685331		cds-WP_037182248.1	0.68364		cds-WP_025432940.1	0.965805
cds-WP_005243989.1	1		cds-WP_005243989.1	1		cds-WP_005251728.1	0.888827		cds-WP_005243989.1	1		cds-WP_226955672.1	0.685331		cds-WP_143767457.1	0.68364		cds-WP_005239390.1	0.965756
cds-WP_005243991.1	1		cds-WP_005243991.1	1		cds-WP_025432189.1	0.888593		cds-WP_005243991.1	1		cds-WP_226955684.1	0.685331		cds-WP_226955514.1	0.68364		cds-WP_037181445.1	0.965741
cds-WP_005243995.1	1		cds-WP_005243995.1	1		cds-WP_005247983.1	0.888448		cds-WP_005243995.1	1		cds-WP_226955695.1	0.685331		cds-WP_226955530.1	0.68364		cds-WP_005244687.1	0.965685
cds-WP_005244000.1	1		cds-WP_005244000.1	1		cds-WP_025432557.1	0.888256		cds-WP_005244000.1	1		cds-WP_226955699.1	0.685331		cds-WP_226955828.1	0.68364		cds-WP_025433179.1	0.965468
cds-WP_005244003.1	1		cds-WP_005244003.1	1		cds-WP_005251683.1	0.888048		cds-WP_005244003.1	1		cds-WP_226955727.1	0.685331		cds-WP_025433161.1	0.683039		cds-WP_025432907.1	0.965453
cds-WP_005244010.1	1		cds-WP_005244010.1	1		cds-WP_005237921.1	0.888025		cds-WP_005244010.1	1		cds-WP_226955732.1	0.685331		cds-WP_005250102.1	0.682953		cds-WP_005248838.1	0.965367
cds-WP_005244012.1	1		cds-WP_005244012.1	1		cds-WP_025433125.1	0.888019		cds-WP_005244012.1	1		cds-WP_226955761.1	0.685331		cds-WP_005238863.1	0.682369		cds-WP_005250572.1	0.965315
cds-WP_005244014.1	1		cds-WP_005244014.1	1		cds-WP_005240899.1	0.887952		cds-WP_005244014.1	1		cds-WP_226955771.1	0.685331		cds-WP_005248751.1	0.682288		cds-WP_025431549.1	0.965272
cds-WP_005244016.1	1		cds-WP_005244016.1	1		cds-WP_005240738.1	0.887848		cds-WP_005244016.1	1		cds-WP_226955805.1	0.685331		cds-WP_005263473.1	0.682162		cds-WP_025433069.1	0.965258
cds-WP_005244021.1	1		cds-WP_005244021.1	1		cds-WP_025432121.1	0.88765		cds-WP_005244021.1	1		cds-WP_264297250.1	0.685331		cds-WP_005245031.1	0.682128		cds-WP_226955687.1	0.965182
cds-WP_005244025.1	1		cds-WP_005244025.1	1		cds-WP_005239637.1	0.887521		cds-WP_005244025.1	1		cds-K2Z90_RS00660	0.615076		cds-WP_005241202.1	0.681625		cds-WP_025432916.1	0.965171
cds-WP_005244040.1	1		cds-WP_005244040.1	1		cds-WP_005244922.1	0.887439		cds-WP_005244040.1	1		cds-K2Z90_RS01535	0.615076		cds-WP_226955781.1	0.68095		cds-WP_005249833.1	0.965141
cds-WP_005244052.1	1		cds-WP_005244052.1	1		cds-WP_005249213.1	0.887394		cds-WP_005244052.1	1		cds-K2Z90_RS02765	0.615076		cds-WP_005243756.1	0.680878		cds-WP_005238848.1	0.965082
cds-WP_005244056.1	1		cds-WP_005244056.1	1		cds-WP_005239894.1	0.887306		cds-WP_005244056.1	1		cds-K2Z90_RS03560	0.615076		cds-WP_005249328.1	0.680759		cds-WP_005243124.1	0.965056
cds-WP_005244060.1	1		cds-WP_005244060.1	1		cds-WP_005243492.1	0.887115		cds-WP_005244060.1	1		cds-K2Z90_RS08195	0.615076		cds-WP_005258203.1	0.680424		cds-WP_005240710.1	0.965014
cds-WP_005244063.1	1		cds-WP_005244063.1	1		cds-WP_005249325.1	0.887066		cds-WP_005244063.1	1		cds-K2Z90_RS11630	0.615076		cds-WP_005249325.1	0.680418		cds-WP_005250807.1	0.964967
cds-WP_005244066.1	1		cds-WP_005244066.1	1		cds-WP_005252902.1	0.886979		cds-WP_005244066.1	1		cds-K2Z90_RS12205	0.615076		cds-WP_005249261.1	0.680417		cds-WP_005243991.1	0.964868
cds-WP_005244070.1	1		cds-WP_005244070.1	1		cds-WP_005243963.1	0.886971		cds-WP_005244070.1	1		cds-K2Z90_RS12350	0.615076		cds-WP_005249255.1	0.680415		cds-WP_005237864.1	0.964828
cds-WP_005244083.1	1		cds-WP_005244083.1	1		cds-WP_005243035.1	0.886966		cds-WP_005244083.1	1		cds-K2Z90_RS12355	0.615076		cds-WP_025433128.1	0.679403		cds-WP_005244196.1	0.964777
cds-WP_005244088.1	1		cds-WP_005244088.1	1		cds-WP_005237946.1	0.88677		cds-WP_005244088.1	1		cds-K2Z90_RS12370	0.615076		cds-WP_005247973.1	0.678949		cds-WP_005243598.1	0.964771
cds-WP_005244094.1	1		cds-WP_005244094.1	1		cds-WP_005250992.1	0.886766		cds-WP_005244094.1	1		cds-K2Z90_RS12380	0.615076		cds-WP_005249254.1	0.678543		cds-WP_005244204.1	0.964519
cds-WP_005244095.1	1		cds-WP_005244095.1	1		cds-WP_005252275.1	0.886725		cds-WP_005244095.1	1		cds-K2Z90_RS12385	0.615076		cds-WP_025431767.1	0.678047		cds-WP_025432110.1	0.964517
cds-WP_005244097.1	1		cds-WP_005244097.1	1		cds-WP_025432315.1	0.886702		cds-WP_005244097.1	1		cds-K2Z90_RS12980	0.615076		cds-WP_005248925.1	0.677966		cds-WP_025432261.1	0.964466
cds-WP_005244098.1	1		cds-WP_005244098.1	1		cds-WP_005246101.1	0.886685		cds-WP_005244098.1	1		cds-K2Z90_RS15425	0.615076		cds-WP_005251059.1	0.67787		cds-WP_005244098.1	0.964342
cds-WP_005244099.1	1		cds-WP_005244099.1	1		cds-WP_005240628.1	0.886646		cds-WP_005244099.1	1		cds-K2Z90_RS15955	0.615076		cds-WP_005240765.1	0.677688		cds-WP_025433300.1	0.964318
cds-WP_005244101.1	1		cds-WP_005244101.1	1		cds-WP_037181850.1	0.886593		cds-WP_005244101.1	1		cds-K2Z90_RS17780	0.615076		cds-WP_005240577.1	0.677348		cds-WP_025433089.1	0.964297
cds-WP_005244105.1	1		cds-WP_005244105.1	1		cds-WP_005251573.1	0.886325		cds-WP_005244105.1	1		cds-K2Z90_RS17790	0.615076		cds-WP_005239366.1	0.677008		cds-WP_025432128.1	0.964295
cds-WP_005244108.1	1		cds-WP_005244108.1	1		cds-WP_005243144.1	0.886251		cds-WP_005244108.1	1		cds-K2Z90_RS19080	0.615076		cds-WP_025431877.1	0.676159		cds-WP_043943921.1	0.964257
cds-WP_005244126.1	1		cds-WP_005244126.1	1		cds-WP_025431747.1	0.88611		cds-WP_005244126.1	1		cds-K2Z90_RS22950	0.615076		cds-WP_005248818.1	0.675982		cds-K2Z90_RS26735	0.964218
cds-WP_005244131.1	1		cds-WP_005244131.1	1		cds-WP_005250948.1	0.885801		cds-WP_005244131.1	1		cds-K2Z90_RS26735	0.615076		cds-WP_005249135.1	0.675692		cds-WP_005251011.1	0.9642
cds-WP_005244133.1	1		cds-WP_005244133.1	1		cds-WP_005250990.1	0.885738		cds-WP_005244133.1	1		cds-K2Z90_RS27905	0.615076		cds-WP_005247450.1	0.675536		cds-WP_025433271.1	0.964068
cds-WP_005244135.1	1		cds-WP_005244135.1	1		cds-WP_005244097.1	0.885697		cds-WP_005244135.1	1		cds-K2Z90_RS28600	0.615076		cds-WP_005244295.1	0.675407		cds-WP_005252029.1	0.964066
cds-WP_005244136.1	1		cds-WP_005244136.1	1		cds-WP_226955523.1	0.885585		cds-WP_005244136.1	1		cds-K2Z90_RS30460	0.615076		cds-WP_005251258.1	0.67519		cds-WP_005245010.1	0.964064
cds-WP_005244137.1	1		cds-WP_005244137.1	1		cds-WP_025433025.1	0.885548		cds-WP_005244137.1	1		cds-K2Z90_RS31385	0.615076		cds-WP_005243035.1	0.67492		cds-WP_005251936.1	0.964028
cds-WP_005244140.1	1		cds-WP_005244140.1	1		cds-WP_005243643.1	0.885509		cds-WP_005244140.1	1		cds-K2Z90_RS35875	0.615076		cds-WP_005251602.1	0.674736		cds-WP_005248949.1	0.964012
cds-WP_005244158.1	1		cds-WP_005244158.1	1		cds-WP_005249254.1	0.885466		cds-WP_005244158.1	1		cds-K2Z90_RS41800	0.615076		cds-WP_179443395.1	0.674643		cds-WP_025431792.1	0.964012
cds-WP_005244162.1	1		cds-WP_005244162.1	1		cds-WP_005249211.1	0.885147		cds-WP_005244162.1	1		cds-WP_003402602.1	0.615076		cds-WP_025431642.1	0.674629		cds-WP_005243762.1	0.963929
cds-WP_005244167.1	1		cds-WP_005244167.1	1		cds-WP_005251375.1	0.885079		cds-WP_005244167.1	1		cds-WP_003936084.1	0.615076		cds-WP_005252872.1	0.674591		cds-WP_025432875.1	0.963924
cds-WP_005244174.1	1		cds-WP_005244174.1	1		cds-WP_037179341.1	0.885064		cds-WP_005244174.1	1		cds-WP_003938068.1	0.615076		cds-WP_005251530.1	0.674248		cds-WP_005238294.1	0.963895
cds-WP_005244180.1	1		cds-WP_005244180.1	1		cds-WP_005248923.1	0.8846		cds-WP_005244180.1	1		cds-WP_005237760.1	0.615076		cds-WP_005240388.1	0.67363		cds-WP_005237790.1	0.963862
cds-WP_005244182.1	1		cds-WP_005244182.1	1		cds-WP_005251540.1	0.884517		cds-WP_005244182.1	1		cds-WP_005237762.1	0.615076		cds-WP_005248548.1	0.673445		cds-WP_005248745.1	0.963848
cds-WP_005244187.1	1		cds-WP_005244187.1	1		cds-WP_005244878.1	0.884482		cds-WP_005244187.1	1		cds-WP_005237763.1	0.615076		cds-WP_005239563.1	0.672766		cds-WP_025433519.1	0.963835
cds-WP_005244194.1	1		cds-WP_005244194.1	1		cds-WP_005252133.1	0.884477		cds-WP_005244194.1	1		cds-WP_005237765.1	0.615076		cds-WP_005248617.1	0.672711		cds-WP_005240222.1	0.963813
cds-WP_005244196.1	1		cds-WP_005244196.1	1		cds-WP_025432000.1	0.884315		cds-WP_005244196.1	1		cds-WP_005237778.1	0.615076		cds-WP_005247637.1	0.67271		cds-WP_005244887.1	0.963751
cds-WP_005244204.1	1		cds-WP_005244204.1	1		cds-WP_005248949.1	0.884275		cds-WP_005244204.1	1		cds-WP_005237782.1	0.615076		cds-WP_005240566.1	0.672694		cds-WP_025433794.1	0.963646
cds-WP_005244206.1	1		cds-WP_005244206.1	1		cds-WP_025431832.1	0.884219		cds-WP_005244206.1	1		cds-WP_005237791.1	0.615076		cds-WP_005238419.1	0.672595		cds-WP_011593973.1	0.963635
cds-WP_005244212.1	1		cds-WP_005244212.1	1		cds-WP_005246233.1	0.883825		cds-WP_005244212.1	1		cds-WP_005237793.1	0.615076		cds-WP_025431964.1	0.672432		cds-WP_005247484.1	0.963626
cds-WP_005244214.1	1		cds-WP_005244214.1	1		cds-WP_005255435.1	0.883725		cds-WP_005244214.1	1		cds-WP_005237799.1	0.615076		cds-WP_005249308.1	0.672275		cds-WP_025432257.1	0.963608
cds-WP_005244223.1	1		cds-WP_005244223.1	1		cds-WP_025433094.1	0.88339		cds-WP_005244223.1	1		cds-WP_005237808.1	0.615076		cds-WP_005248856.1	0.67184		cds-WP_264297272.1	0.9636
cds-WP_005244232.1	1		cds-WP_005244232.1	1		cds-WP_005252084.1	0.883263		cds-WP_005244232.1	1		cds-WP_005237814.1	0.615076		cds-K2Z90_RS12265	0.671182		cds-WP_025431975.1	0.963589
cds-WP_005244236.1	1		cds-WP_005244236.1	1		cds-WP_005248630.1	0.883085		cds-WP_005244236.1	1		cds-WP_005237826.1	0.615076		cds-WP_005243901.1	0.671146		cds-WP_025433137.1	0.96357
cds-WP_005244240.1	1		cds-WP_005244240.1	1		cds-WP_025433053.1	0.88306		cds-WP_005244240.1	1		cds-WP_005237829.1	0.615076		cds-WP_005250847.1	0.671016		cds-WP_005252461.1	0.96356
cds-WP_005244250.1	1		cds-WP_005244250.1	1		cds-WP_025432314.1	0.882782		cds-WP_005244250.1	1		cds-WP_005237830.1	0.615076		cds-WP_005244063.1	0.670538		cds-WP_005265605.1	0.963488
cds-WP_005244291.1	1		cds-WP_005244291.1	1		cds-WP_043943780.1	0.882768		cds-WP_005244291.1	1		cds-WP_005237840.1	0.615076		cds-WP_025432597.1	0.670308		cds-WP_005247571.1	0.963484
cds-WP_005244302.1	1		cds-WP_005244302.1	1		cds-WP_025432924.1	0.8827		cds-WP_005244302.1	1		cds-WP_005237855.1	0.615076		cds-WP_005239847.1	0.669959		cds-WP_025432545.1	0.963469
cds-WP_005244305.1	1		cds-WP_005244305.1	1		cds-WP_005243141.1	0.88227		cds-WP_005244305.1	1		cds-WP_005237862.1	0.615076		cds-WP_005241026.1	0.669839		cds-WP_005244443.1	0.96339
cds-WP_005244308.1	1		cds-WP_005244308.1	1		cds-WP_005249981.1	0.882231		cds-WP_005244308.1	1		cds-WP_005237864.1	0.615076		cds-WP_005248491.1	0.669741		cds-WP_005237808.1	0.963389
cds-WP_005244312.1	1		cds-WP_005244312.1	1		cds-WP_005244607.1	0.88219		cds-WP_005244312.1	1		cds-WP_005237871.1	0.615076		cds-WP_005242373.1	0.669665		cds-WP_025431663.1	0.963378
cds-WP_005244325.1	1		cds-WP_005244325.1	1		cds-WP_025432222.1	0.882183		cds-WP_005244325.1	1		cds-WP_005237888.1	0.615076		cds-WP_025431971.1	0.669375		cds-WP_005247928.1	0.963219
cds-WP_005244337.1	1		cds-WP_005244337.1	1		cds-WP_005251513.1	0.882064		cds-WP_005244337.1	1		cds-WP_005237893.1	0.615076		cds-WP_025433250.1	0.669223		cds-WP_005251331.1	0.963212
cds-WP_005244344.1	1		cds-WP_005244344.1	1		cds-WP_005248500.1	0.882015		cds-WP_005244344.1	1		cds-WP_005237902.1	0.615076		cds-WP_085990781.1	0.668921		cds-WP_005261289.1	0.963141
cds-WP_005244346.1	1		cds-WP_005244346.1	1		cds-WP_025433012.1	0.882001		cds-WP_005244346.1	1		cds-WP_005237921.1	0.615076		cds-WP_025431611.1	0.668834		cds-WP_037182788.1	0.963062
cds-WP_005244349.1	1		cds-WP_005244349.1	1		cds-WP_005252069.1	0.881956		cds-WP_005244349.1	1		cds-WP_005237923.1	0.615076		cds-WP_005252949.1	0.668786		cds-WP_005247903.1	0.963046
cds-WP_005244352.1	1		cds-WP_005244352.1	1		cds-WP_025433256.1	0.881877		cds-WP_005244352.1	1		cds-WP_005237924.1	0.615076		cds-WP_005248367.1	0.668651		cds-WP_005246069.1	0.962913
cds-WP_005244373.1	1		cds-WP_005244373.1	1		cds-WP_025432896.1	0.881871		cds-WP_005244373.1	1		cds-WP_005237933.1	0.615076		cds-WP_005240135.1	0.668637		cds-WP_005242753.1	0.962909
cds-WP_005244377.1	1		cds-WP_005244377.1	1		cds-WP_005244787.1	0.881777		cds-WP_005244377.1	1		cds-WP_005237935.1	0.615076		cds-WP_025431866.1	0.668394		cds-WP_005240315.1	0.962895
cds-WP_005244387.1	1		cds-WP_005244387.1	1		cds-WP_061041700.1	0.881688		cds-WP_005244387.1	1		cds-WP_005237936.1	0.615076		cds-WP_061700978.1	0.668311		cds-WP_025432001.1	0.96283
cds-WP_005244389.1	1		cds-WP_005244389.1	1		cds-WP_005244505.1	0.881593		cds-WP_005244389.1	1		cds-WP_005237939.1	0.615076		cds-WP_005252456.1	0.668198		cds-WP_005238809.1	0.962821
cds-WP_005244393.1	1		cds-WP_005244393.1	1		cds-WP_025433574.1	0.881537		cds-WP_005244393.1	1		cds-WP_005237942.1	0.615076		cds-WP_005249620.1	0.668081		cds-WP_025433642.1	0.962784
cds-WP_005244413.1	1		cds-WP_005244413.1	1		cds-WP_005248606.1	0.881462		cds-WP_005244413.1	1		cds-WP_005237951.1	0.615076		cds-WP_005247951.1	0.667902		cds-WP_226955607.1	0.962773
cds-WP_005244415.1	1		cds-WP_005244415.1	1		cds-WP_005260370.1	0.881406		cds-WP_005244415.1	1		cds-WP_005237953.1	0.615076		cds-WP_005247705.1	0.667849		cds-WP_005237902.1	0.962767
cds-WP_005244417.1	1		cds-WP_005244417.1	1		cds-K2Z90_RS12205	0.881251		cds-WP_005244417.1	1		cds-WP_005237962.1	0.615076		cds-WP_025433052.1	0.667734		cds-WP_005247587.1	0.962679
cds-WP_005244422.1	1		cds-WP_005244422.1	1		cds-WP_005238442.1	0.880845		cds-WP_005244422.1	1		cds-WP_005237968.1	0.615076		cds-WP_025431730.1	0.667699		cds-WP_005251760.1	0.962524
cds-WP_005244429.1	1		cds-WP_005244429.1	1		cds-WP_005251023.1	0.880731		cds-WP_005244429.1	1		cds-WP_005237978.1	0.615076		cds-WP_005238227.1	0.667326		cds-WP_005240225.1	0.962496
cds-WP_005244430.1	1		cds-WP_005244430.1	1		cds-WP_005247766.1	0.880721		cds-WP_005244430.1	1		cds-WP_005238055.1	0.615076		cds-K2Z90_RS31175	0.667164		cds-WP_005243791.1	0.962315
cds-WP_005244433.1	1		cds-WP_005244433.1	1		cds-WP_005239598.1	0.880618		cds-WP_005244433.1	1		cds-WP_005238072.1	0.615076		cds-WP_025431747.1	0.666401		cds-WP_005249093.1	0.962308
cds-WP_005244442.1	1		cds-WP_005244442.1	1		cds-WP_005251223.1	0.880592		cds-WP_005244442.1	1		cds-WP_005238100.1	0.615076		cds-WP_005240715.1	0.666386		cds-WP_005244958.1	0.962298
cds-WP_005244443.1	1		cds-WP_005244443.1	1		cds-WP_226955582.1	0.880579		cds-WP_005244443.1	1		cds-WP_005238107.1	0.615076		cds-WP_025432063.1	0.66631		cds-WP_005238099.1	0.962241
cds-WP_005244444.1	1		cds-WP_005244444.1	1		cds-WP_005238803.1	0.880471		cds-WP_005244444.1	1		cds-WP_005238125.1	0.615076		cds-WP_005243568.1	0.666265		cds-WP_005237871.1	0.962225
cds-WP_005244451.1	1		cds-WP_005244451.1	1		cds-WP_005237960.1	0.880379		cds-WP_005244451.1	1		cds-WP_005238131.1	0.615076		cds-WP_005248724.1	0.666053		cds-WP_005251672.1	0.962216
cds-WP_005244486.1	1		cds-WP_005244486.1	1		cds-WP_005239513.1	0.880288		cds-WP_005244486.1	1		cds-WP_005238215.1	0.615076		cds-WP_005240514.1	0.665949		cds-WP_005251584.1	0.962195
cds-WP_005244503.1	1		cds-WP_005244503.1	1		cds-WP_005239658.1	0.880091		cds-WP_005244503.1	1		cds-WP_005238217.1	0.615076		cds-WP_005243605.1	0.665804		cds-WP_043943640.1	0.96209
cds-WP_005244505.1	1		cds-WP_005244505.1	1		cds-WP_025433600.1	0.880019		cds-WP_005244505.1	1		cds-WP_005238251.1	0.615076		cds-WP_005238566.1	0.665286		cds-WP_005246065.1	0.96198
cds-WP_005244512.1	1		cds-WP_005244512.1	1		cds-WP_005252377.1	0.880014		cds-WP_005244512.1	1		cds-WP_005238257.1	0.615076		cds-WP_005250824.1	0.665219		cds-WP_011596917.1	0.961948
cds-WP_005244518.1	1		cds-WP_005244518.1	1		cds-WP_005249686.1	0.879839		cds-WP_005244518.1	1		cds-WP_005238269.1	0.615076		cds-WP_005240383.1	0.665194		cds-WP_005240409.1	0.961884
cds-WP_005244523.1	1		cds-WP_005244523.1	1		cds-WP_005248897.1	0.879796		cds-WP_005244523.1	1		cds-WP_005238286.1	0.615076		cds-WP_037181550.1	0.665039		cds-WP_025433158.1	0.961872
cds-WP_005244524.1	1		cds-WP_005244524.1	1		cds-WP_005244825.1	0.879377		cds-WP_005244524.1	1		cds-WP_005238294.1	0.615076		cds-WP_005242384.1	0.664817		cds-WP_025433272.1	0.961859
cds-WP_005244526.1	1		cds-WP_005244526.1	1		cds-WP_005244680.1	0.879335		cds-WP_005244526.1	1		cds-WP_005238331.1	0.615076		cds-WP_005249469.1	0.664786		cds-WP_025432210.1	0.961825
cds-WP_005244528.1	1		cds-WP_005244528.1	1		cds-WP_226955688.1	0.879179		cds-WP_005244528.1	1		cds-WP_005238343.1	0.615076		cds-WP_005250537.1	0.664704		cds-WP_005237946.1	0.961817
cds-WP_005244531.1	1		cds-WP_005244531.1	1		cds-WP_005238845.1	0.879169		cds-WP_005244531.1	1		cds-WP_005238363.1	0.615076		cds-WP_025432887.1	0.664681		cds-WP_005251540.1	0.961806
cds-WP_005244553.1	1		cds-WP_005244553.1	1		cds-WP_025432560.1	0.879137		cds-WP_005244553.1	1		cds-WP_005238367.1	0.615076		cds-WP_005239355.1	0.66448		cds-WP_005251046.1	0.961782
cds-WP_005244557.1	1		cds-WP_005244557.1	1		cds-WP_005238339.1	0.878993		cds-WP_005244557.1	1		cds-WP_005238398.1	0.615076		cds-WP_003936084.1	0.664245		cds-WP_005239613.1	0.961747
cds-WP_005244560.1	1		cds-WP_005244560.1	1		cds-WP_037183109.1	0.878817		cds-WP_005244560.1	1		cds-WP_005238400.1	0.615076		cds-WP_005252780.1	0.664108		cds-WP_005243958.1	0.961672
cds-WP_005244568.1	1		cds-WP_005244568.1	1		cds-WP_025432421.1	0.8788		cds-WP_005244568.1	1		cds-WP_005238418.1	0.615076		cds-WP_005252838.1	0.664059		cds-WP_005248274.1	0.961667
cds-WP_005244576.1	1		cds-WP_005244576.1	1		cds-WP_005251971.1	0.878606		cds-WP_005244576.1	1		cds-WP_005238419.1	0.615076		cds-WP_005239617.1	0.663673		cds-WP_005252148.1	0.961629
cds-WP_005244579.1	1		cds-WP_005244579.1	1		cds-WP_005240205.1	0.878308		cds-WP_005244579.1	1		cds-WP_005238424.1	0.615076		cds-WP_005246185.1	0.663453		cds-WP_005247654.1	0.961625
cds-WP_005244586.1	1		cds-WP_005244586.1	1		cds-WP_005247571.1	0.878101		cds-WP_005244586.1	1		cds-WP_005238426.1	0.615076		cds-WP_025431892.1	0.663256		cds-WP_025432102.1	0.961307
cds-WP_005244587.1	1		cds-WP_005244587.1	1		cds-WP_005247587.1	0.877778		cds-WP_005244587.1	1		cds-WP_005238441.1	0.615076		cds-WP_005246352.1	0.663149		cds-WP_005239412.1	0.961271
cds-WP_005244590.1	1		cds-WP_005244590.1	1		cds-WP_005250010.1	0.877642		cds-WP_005244590.1	1		cds-WP_005238454.1	0.615076		cds-WP_005249767.1	0.663019		cds-WP_025433593.1	0.961213
cds-WP_005244592.1	1		cds-WP_005244592.1	1		cds-WP_005240344.1	0.877639		cds-WP_005244592.1	1		cds-WP_005238456.1	0.615076		cds-WP_080702728.1	0.662875		cds-WP_005252722.1	0.96116
cds-WP_005244594.1	1		cds-WP_005244594.1	1		cds-WP_025431618.1	0.877475		cds-WP_005244594.1	1		cds-WP_005238474.1	0.615076		cds-WP_005252150.1	0.662852		cds-WP_025433229.1	0.961101
cds-WP_005244595.1	1		cds-WP_005244595.1	1		cds-WP_025432713.1	0.877103		cds-WP_005244595.1	1		cds-WP_005238505.1	0.615076		cds-WP_005243092.1	0.66279		cds-WP_005240620.1	0.961044
cds-WP_005244597.1	1		cds-WP_005244597.1	1		cds-WP_005243585.1	0.877037		cds-WP_005244597.1	1		cds-WP_005238508.1	0.615076		cds-WP_005245309.1	0.662462		cds-WP_005252033.1	0.961024
cds-WP_005244598.1	1		cds-WP_005244598.1	1		cds-WP_037181763.1	0.87694		cds-WP_005244598.1	1		cds-WP_005238509.1	0.615076		cds-WP_005251609.1	0.662368		cds-WP_005251269.1	0.960884
cds-WP_005244599.1	1		cds-WP_005244599.1	1		cds-WP_025432305.1	0.876885		cds-WP_005244599.1	1		cds-WP_005238510.1	0.615076		cds-WP_005249137.1	0.662139		cds-WP_005251332.1	0.960817
cds-WP_005244603.1	1		cds-WP_005244603.1	1		cds-WP_005243149.1	0.876868		cds-WP_005244603.1	1		cds-WP_005238511.1	0.615076		cds-WP_005238131.1	0.661888		cds-WP_005244126.1	0.960661
cds-WP_005244607.1	1		cds-WP_005244607.1	1		cds-WP_005244021.1	0.87684		cds-WP_005244607.1	1		cds-WP_005238564.1	0.615076		cds-WP_005244569.1	0.661887		cds-WP_037182782.1	0.960641
cds-WP_005244608.1	1		cds-WP_005244608.1	1		cds-WP_005240744.1	0.876623		cds-WP_005244608.1	1		cds-WP_005238567.1	0.615076		cds-WP_025432293.1	0.661768		cds-WP_005250920.1	0.960528
cds-WP_005244612.1	1		cds-WP_005244612.1	1		cds-WP_025432090.1	0.87658		cds-WP_005244612.1	1		cds-WP_005238579.1	0.615076		cds-WP_025433262.1	0.661693		cds-WP_005250010.1	0.96051
cds-WP_005244614.1	1		cds-WP_005244614.1	1		cds-WP_005238754.1	0.876457		cds-WP_005244614.1	1		cds-WP_005238588.1	0.615076		cds-WP_005238853.1	0.661679		cds-WP_005247564.1	0.960469
cds-WP_005244615.1	1		cds-WP_005244615.1	1		cds-WP_005252787.1	0.876316		cds-WP_005244615.1	1		cds-WP_005238598.1	0.615076		cds-WP_005238827.1	0.661197		cds-WP_005242798.1	0.960324
cds-WP_005244617.1	1		cds-WP_005244617.1	1		cds-WP_025431862.1	0.876216		cds-WP_005244617.1	1		cds-WP_005238606.1	0.615076		cds-WP_005240711.1	0.660821		cds-WP_025431678.1	0.960323
cds-WP_005244618.1	1		cds-WP_005244618.1	1		cds-WP_005252387.1	0.876146		cds-WP_005244618.1	1		cds-WP_005238656.1	0.615076		cds-WP_005246078.1	0.660638		cds-WP_025433637.1	0.960224
cds-WP_005244634.1	1		cds-WP_005244634.1	1		cds-K2Z90_RS08195	0.875839		cds-WP_005244634.1	1		cds-WP_005238658.1	0.615076		cds-WP_005245122.1	0.660496		cds-WP_025431662.1	0.960207
cds-WP_005244640.1	1		cds-WP_005244640.1	1		cds-WP_226955727.1	0.875793		cds-WP_005244640.1	1		cds-WP_005238669.1	0.615076		cds-WP_005239924.1	0.660462		cds-WP_005248861.1	0.960133
cds-WP_005244644.1	1		cds-WP_005244644.1	1		cds-WP_005248139.1	0.875661		cds-WP_005244644.1	1		cds-WP_005238679.1	0.615076		cds-K2Z90_RS22950	0.660265		cds-WP_005246079.1	0.960097
cds-WP_005244673.1	1		cds-WP_005244673.1	1		cds-WP_005249255.1	0.875575		cds-WP_005244673.1	1		cds-WP_005238685.1	0.615076		cds-WP_005243718.1	0.660153		cds-WP_025433283.1	0.960032
cds-WP_005244674.1	1		cds-WP_005244674.1	1		cds-WP_226955532.1	0.875419		cds-WP_005244674.1	1		cds-WP_005238704.1	0.615076		cds-WP_005249088.1	0.65939		cds-WP_005238877.1	0.960024
cds-WP_005244680.1	1		cds-WP_005244680.1	1		cds-WP_005247472.1	0.875368		cds-WP_005244680.1	1		cds-WP_005238722.1	0.615076		cds-WP_025432598.1	0.65891		cds-WP_005252275.1	0.959939
cds-WP_005244682.1	1		cds-WP_005244682.1	1		cds-WP_025431896.1	0.87519		cds-WP_005244682.1	1		cds-WP_005238735.1	0.615076		cds-WP_025433220.1	0.658858		cds-WP_025433246.1	0.959908
cds-WP_005244687.1	1		cds-WP_005244687.1	1		cds-WP_005240414.1	0.875017		cds-WP_005244687.1	1		cds-WP_005238740.1	0.615076		cds-WP_005237802.1	0.658747		cds-WP_025432195.1	0.959835
cds-WP_005244691.1	1		cds-WP_005244691.1	1		cds-WP_025431701.1	0.874994		cds-WP_005244691.1	1		cds-WP_005238747.1	0.615076		cds-WP_005248900.1	0.65852		cds-WP_005249725.1	0.959819
cds-WP_005244696.1	1		cds-WP_005244696.1	1		cds-WP_005250848.1	0.874746		cds-WP_005244696.1	1		cds-WP_005238748.1	0.615076		cds-WP_025432881.1	0.658297		cds-WP_005240143.1	0.959779
cds-WP_005244704.1	1		cds-WP_005244704.1	1		cds-WP_005247909.1	0.874669		cds-WP_005244704.1	1		cds-WP_005238758.1	0.615076		cds-WP_005244930.1	0.658149		cds-WP_005237923.1	0.959768
cds-WP_005244713.1	1		cds-WP_005244713.1	1		cds-WP_005251935.1	0.874577		cds-WP_005244713.1	1		cds-WP_005238759.1	0.615076		cds-WP_025433006.1	0.657821		cds-WP_187300153.1	0.959716
cds-WP_005244719.1	1		cds-WP_005244719.1	1		cds-WP_005252299.1	0.874329		cds-WP_005244719.1	1		cds-WP_005238760.1	0.615076		cds-WP_005240099.1	0.657661		cds-WP_005238844.1	0.959686
cds-WP_005244721.1	1		cds-WP_005244721.1	1		cds-WP_005241412.1	0.874322		cds-WP_005244721.1	1		cds-WP_005238766.1	0.615076		cds-WP_005241761.1	0.657616		cds-WP_025433273.1	0.959679
cds-WP_005244726.1	1		cds-WP_005244726.1	1		cds-WP_005237785.1	0.87425		cds-WP_005244726.1	1		cds-WP_005238767.1	0.615076		cds-WP_005239680.1	0.656907		cds-WP_005239546.1	0.959602
cds-WP_005244729.1	1		cds-WP_005244729.1	1		cds-WP_005240583.1	0.874195		cds-WP_005244729.1	1		cds-WP_005238769.1	0.615076		cds-WP_005251379.1	0.656654		cds-WP_005244012.1	0.959569
cds-WP_005244733.1	1		cds-WP_005244733.1	1		cds-WP_005237791.1	0.87413		cds-WP_005244733.1	1		cds-WP_005238788.1	0.615076		cds-WP_005260370.1	0.656469		cds-WP_025432403.1	0.959554
cds-WP_005244735.1	1		cds-WP_005244735.1	1		cds-WP_005248218.1	0.874052		cds-WP_005244735.1	1		cds-WP_005238789.1	0.615076		cds-WP_005244704.1	0.656322		cds-WP_005246327.1	0.959495
cds-WP_005244751.1	1		cds-WP_005244751.1	1		cds-WP_025433166.1	0.874014		cds-WP_005244751.1	1		cds-WP_005238792.1	0.615076		cds-WP_005240334.1	0.656311		cds-WP_005238757.1	0.95948
cds-WP_005244775.1	1		cds-WP_005244775.1	1		cds-WP_005244194.1	0.873955		cds-WP_005244775.1	1		cds-WP_005238794.1	0.615076		cds-WP_025431700.1	0.65621		cds-WP_025432968.1	0.959445
cds-WP_005244787.1	1		cds-WP_005244787.1	1		cds-WP_005247513.1	0.873871		cds-WP_005244787.1	1		cds-WP_005238800.1	0.615076		cds-WP_005244713.1	0.655919		cds-WP_005239376.1	0.95924
cds-WP_005244790.1	1		cds-WP_005244790.1	1		cds-WP_005252403.1	0.873789		cds-WP_005244790.1	1		cds-WP_005238803.1	0.615076		cds-WP_005250401.1	0.655666		cds-WP_005243103.1	0.959102
cds-WP_005244798.1	1		cds-WP_005244798.1	1		cds-WP_025431951.1	0.873684		cds-WP_005244798.1	1		cds-WP_005238808.1	0.615076		cds-WP_005247529.1	0.655583		cds-WP_005252457.1	0.959091
cds-WP_005244800.1	1		cds-WP_005244800.1	1		cds-WP_005239048.1	0.873629		cds-WP_005244800.1	1		cds-WP_005238814.1	0.615076		cds-WP_005250759.1	0.655088		cds-WP_005251343.1	0.959086
cds-WP_005244806.1	1		cds-WP_005244806.1	1		cds-WP_226955719.1	0.873117		cds-WP_005244806.1	1		cds-WP_005238821.1	0.615076		cds-WP_005252264.1	0.655077		cds-WP_005241723.1	0.95906
cds-WP_005244825.1	1		cds-WP_005244825.1	1		cds-WP_005240640.1	0.873085		cds-WP_005244825.1	1		cds-WP_005238831.1	0.615076		cds-WP_005239253.1	0.654556		cds-WP_005243801.1	0.959006
cds-WP_005244827.1	1		cds-WP_005244827.1	1		cds-WP_005246311.1	0.873044		cds-WP_005244827.1	1		cds-WP_005238834.1	0.615076		cds-WP_264297275.1	0.65403		cds-WP_005237765.1	0.958941
cds-WP_005244831.1	1		cds-WP_005244831.1	1		cds-WP_005239102.1	0.872975		cds-WP_005244831.1	1		cds-WP_005238840.1	0.615076		cds-WP_005240218.1	0.653586		cds-WP_005251544.1	0.958896
cds-WP_005244834.1	1		cds-WP_005244834.1	1		cds-WP_005237978.1	0.872918		cds-WP_005244834.1	1		cds-WP_005238844.1	0.615076		cds-WP_005241678.1	0.653208		cds-WP_005247980.1	0.958892
cds-WP_005244836.1	1		cds-WP_005244836.1	1		cds-WP_005252904.1	0.872802		cds-WP_005244836.1	1		cds-WP_005238845.1	0.615076		cds-WP_005250930.1	0.652973		cds-WP_005237826.1	0.958875
cds-WP_005244837.1	1		cds-WP_005244837.1	1		cds-WP_025432192.1	0.872582		cds-WP_005244837.1	1		cds-WP_005238848.1	0.615076		cds-WP_005241016.1	0.652291		cds-WP_005248642.1	0.958759
cds-WP_005244840.1	1		cds-WP_005244840.1	1		cds-WP_025433107.1	0.872564		cds-WP_005244840.1	1		cds-WP_005238853.1	0.615076		cds-WP_025432542.1	0.652152		cds-WP_025433066.1	0.95871
cds-WP_005244846.1	1		cds-WP_005244846.1	1		cds-WP_005238840.1	0.87232		cds-WP_005244846.1	1		cds-WP_005238864.1	0.615076		cds-WP_005250777.1	0.652101		cds-WP_005244174.1	0.958594
cds-WP_005244847.1	1		cds-WP_005244847.1	1		cds-WP_226955669.1	0.872223		cds-WP_005244847.1	1		cds-WP_005238868.1	0.615076		cds-WP_005244590.1	0.651742		cds-WP_005250149.1	0.958571
cds-WP_005244854.1	1		cds-WP_005244854.1	1		cds-WP_037179885.1	0.872217		cds-WP_005244854.1	1		cds-WP_005238869.1	0.615076		cds-WP_005247649.1	0.65125		cds-WP_005243696.1	0.958518
cds-WP_005244857.1	1		cds-WP_005244857.1	1		cds-WP_005244312.1	0.872131		cds-WP_005244857.1	1		cds-WP_005238898.1	0.615076		cds-WP_005240340.1	0.650645		cds-WP_005252757.1	0.958398
cds-WP_005244859.1	1		cds-WP_005244859.1	1		cds-WP_005251689.1	0.872		cds-WP_005244859.1	1		cds-WP_005238900.1	0.615076		cds-WP_005249326.1	0.650592		cds-WP_025432223.1	0.958366
cds-WP_005244861.1	1		cds-WP_005244861.1	1		cds-WP_005246496.1	0.871857		cds-WP_005244861.1	1		cds-WP_005238916.1	0.615076		cds-WP_025432071.1	0.650181		cds-WP_005248850.1	0.958263
cds-WP_005244863.1	1		cds-WP_005244863.1	1		cds-WP_005243068.1	0.87185		cds-WP_005244863.1	1		cds-WP_005238944.1	0.615076		cds-WP_037179069.1	0.650118		cds-WP_025432344.1	0.958246
cds-WP_005244864.1	1		cds-WP_005244864.1	1		cds-WP_005239770.1	0.87176		cds-WP_005244864.1	1		cds-WP_005238960.1	0.615076		cds-WP_025432392.1	0.650067		cds-WP_005244894.1	0.958198
cds-WP_005244870.1	1		cds-WP_005244870.1	1		cds-WP_005248892.1	0.871595		cds-WP_005244870.1	1		cds-WP_005238976.1	0.615076		cds-WP_005250988.1	0.649934		cds-WP_029539455.1	0.958054
cds-WP_005244873.1	1		cds-WP_005244873.1	1		cds-WP_005240781.1	0.871589		cds-WP_005244873.1	1		cds-WP_005238991.1	0.615076		cds-WP_025433617.1	0.649777		cds-WP_005244016.1	0.957911
cds-WP_005244877.1	1		cds-WP_005244877.1	1		cds-WP_005249651.1	0.871534		cds-WP_005244877.1	1		cds-WP_005238995.1	0.615076		cds-WP_005240110.1	0.649683		cds-WP_043943812.1	0.957804
cds-WP_005244878.1	1		cds-WP_005244878.1	1		cds-WP_005252927.1	0.871492		cds-WP_005244878.1	1		cds-WP_005238998.1	0.615076		cds-WP_025432934.1	0.649142		cds-WP_025431592.1	0.957775
cds-WP_005244880.1	1		cds-WP_005244880.1	1		cds-WP_005249093.1	0.871492		cds-WP_005244880.1	1		cds-WP_005239011.1	0.615076		cds-WP_005256569.1	0.648868		cds-WP_005244985.1	0.957735
cds-WP_005244882.1	1		cds-WP_005244882.1	1		cds-WP_005252794.1	0.871397		cds-WP_005244882.1	1		cds-WP_005239017.1	0.615076		cds-WP_005246071.1	0.648829		cds-WP_005248579.1	0.957732
cds-WP_005244883.1	1		cds-WP_005244883.1	1		cds-WP_005239121.1	0.871306		cds-WP_005244883.1	1		cds-WP_005239077.1	0.615076		cds-WP_005246676.1	0.648359		cds-WP_005243887.1	0.957732
cds-WP_005244886.1	1		cds-WP_005244886.1	1		cds-WP_005252432.1	0.871234		cds-WP_005244886.1	1		cds-WP_005239084.1	0.615076		cds-WP_025431657.1	0.648126		cds-WP_025433247.1	0.957711
cds-WP_005244889.1	1		cds-WP_005244889.1	1		cds-WP_025431663.1	0.871197		cds-WP_005244889.1	1		cds-WP_005239102.1	0.615076		cds-WP_037182685.1	0.647651		cds-WP_037179453.1	0.95771
cds-WP_005244891.1	1		cds-WP_005244891.1	1		cds-WP_005252180.1	0.870782		cds-WP_005244891.1	1		cds-WP_005239116.1	0.615076		cds-WP_005242487.1	0.647373		cds-WP_025433426.1	0.957667
cds-WP_005244894.1	1		cds-WP_005244894.1	1		cds-WP_025432341.1	0.870761		cds-WP_005244894.1	1		cds-WP_005239121.1	0.615076		cds-WP_005244951.1	0.647185		cds-WP_005252355.1	0.957576
cds-WP_005244897.1	1		cds-WP_005244897.1	1		cds-WP_005244204.1	0.870675		cds-WP_005244897.1	1		cds-WP_005239148.1	0.615076		cds-WP_005247630.1	0.647119		cds-WP_005252937.1	0.957514
cds-WP_005244907.1	1		cds-WP_005244907.1	1		cds-WP_005250773.1	0.87058		cds-WP_005244907.1	1		cds-WP_005239154.1	0.615076		cds-WP_226955727.1	0.646402		cds-WP_005251699.1	0.957465
cds-WP_005244912.1	1		cds-WP_005244912.1	1		cds-WP_005241766.1	0.870502		cds-WP_005244912.1	1		cds-WP_005239185.1	0.615076		cds-WP_005241813.1	0.645825		cds-WP_005240911.1	0.957367
cds-WP_005244922.1	1		cds-WP_005244922.1	1		cds-WP_005240577.1	0.870224		cds-WP_005244922.1	1		cds-WP_005239210.1	0.615076		cds-WP_025433504.1	0.645484		cds-WP_005252034.1	0.957348
cds-WP_005244926.1	1		cds-WP_005244926.1	1		cds-WP_005251402.1	0.87021		cds-WP_005244926.1	1		cds-WP_005239236.1	0.615076		cds-WP_226955699.1	0.645264		cds-WP_005252038.1	0.957306
cds-WP_005244930.1	1		cds-WP_005244930.1	1		cds-WP_005246296.1	0.870125		cds-WP_005244930.1	1		cds-WP_005239244.1	0.615076		cds-WP_025432850.1	0.645108		cds-WP_005248813.1	0.957254
cds-WP_005244942.1	1		cds-WP_005244942.1	1		cds-WP_005262275.1	0.870123		cds-WP_005244942.1	1		cds-WP_005239249.1	0.615076		cds-WP_005252875.1	0.644895		cds-WP_005252014.1	0.957236
cds-WP_005244945.1	1		cds-WP_005244945.1	1		cds-WP_025431694.1	0.87012		cds-WP_005244945.1	1		cds-WP_005239253.1	0.615076		cds-WP_005567996.1	0.644895		cds-WP_005244877.1	0.957221
cds-WP_005244951.1	1		cds-WP_005244951.1	1		cds-WP_005250574.1	0.869964		cds-WP_005244951.1	1		cds-WP_005239266.1	0.615076		cds-WP_005243848.1	0.644564		cds-WP_005238605.1	0.957216
cds-WP_005244957.1	1		cds-WP_005244957.1	1		cds-WP_005239397.1	0.869924		cds-WP_005244957.1	1		cds-WP_005239304.1	0.615076		cds-WP_005238869.1	0.644491		cds-WP_025432410.1	0.957174
cds-WP_005244958.1	1		cds-WP_005244958.1	1		cds-WP_005252945.1	0.869837		cds-WP_005244958.1	1		cds-WP_005239346.1	0.615076		cds-WP_005247408.1	0.644465		cds-WP_005250148.1	0.95714
cds-WP_005244970.1	1		cds-WP_005244970.1	1		cds-WP_025431836.1	0.869787		cds-WP_005244970.1	1		cds-WP_005239376.1	0.615076		cds-WP_005242722.1	0.643922		cds-WP_005238766.1	0.957042
cds-WP_005244976.1	1		cds-WP_005244976.1	1		cds-WP_005246211.1	0.869787		cds-WP_005244976.1	1		cds-WP_005239384.1	0.615076		cds-WP_025432314.1	0.643609		cds-WP_005243961.1	0.957037
cds-WP_005244978.1	1		cds-WP_005244978.1	1		cds-WP_005248844.1	0.869777		cds-WP_005244978.1	1		cds-WP_005239397.1	0.615076		cds-WP_025433789.1	0.643407		cds-WP_005239234.1	0.95697
cds-WP_005244981.1	1		cds-WP_005244981.1	1		cds-WP_025432308.1	0.869521		cds-WP_005244981.1	1		cds-WP_005239429.1	0.615076		cds-WP_005241787.1	0.643338		cds-WP_025431641.1	0.956932
cds-WP_005244982.1	1		cds-WP_005244982.1	1		cds-WP_025432145.1	0.869426		cds-WP_005244982.1	1		cds-WP_005239455.1	0.615076		cds-WP_005243807.1	0.643226		cds-WP_005240600.1	0.956928
cds-WP_005244988.1	1		cds-WP_005244988.1	1		cds-WP_005240735.1	0.86929		cds-WP_005244988.1	1		cds-WP_005239478.1	0.615076		cds-WP_005250999.1	0.643095		cds-WP_005251683.1	0.956906
cds-WP_005244992.1	1		cds-WP_005244992.1	1		cds-WP_005244240.1	0.869285		cds-WP_005244992.1	1		cds-WP_005239503.1	0.615076		cds-WP_005250518.1	0.642844		cds-WP_005246071.1	0.956849
cds-WP_005244993.1	1		cds-WP_005244993.1	1		cds-WP_005247511.1	0.869232		cds-WP_005244993.1	1		cds-WP_005239504.1	0.615076		cds-WP_005239770.1	0.642326		cds-WP_226955660.1	0.956831
cds-WP_005244999.1	1		cds-WP_005244999.1	1		cds-WP_005258384.1	0.869121		cds-WP_005244999.1	1		cds-WP_005239508.1	0.615076		cds-WP_005251076.1	0.642162		cds-WP_005238769.1	0.956779
cds-WP_005245010.1	1		cds-WP_005245010.1	1		cds-WP_037179308.1	0.869057		cds-WP_005245010.1	1		cds-WP_005239511.1	0.615076		cds-WP_005251056.1	0.64178		cds-WP_005244834.1	0.95677
cds-WP_005245011.1	1		cds-WP_005245011.1	1		cds-WP_005248548.1	0.869055		cds-WP_005245011.1	1		cds-WP_005239513.1	0.615076		cds-WP_005247513.1	0.641649		cds-WP_005238754.1	0.956749
cds-WP_005245014.1	1		cds-WP_005245014.1	1		cds-WP_005244060.1	0.868965		cds-WP_005245014.1	1		cds-WP_005239548.1	0.615076		cds-WP_005238920.1	0.641593		cds-WP_005247738.1	0.956691
cds-WP_005245019.1	1		cds-WP_005245019.1	1		cds-WP_005238941.1	0.868884		cds-WP_005245019.1	1		cds-WP_005239602.1	0.615076		cds-WP_005243645.1	0.641478		cds-WP_005252672.1	0.956672
cds-WP_005245024.1	1		cds-WP_005245024.1	1		cds-WP_005250984.1	0.868685		cds-WP_005245024.1	1		cds-WP_005239616.1	0.615076		cds-WP_005240048.1	0.641325		cds-WP_005240977.1	0.956647
cds-WP_005245026.1	1		cds-WP_005245026.1	1		cds-WP_005248199.1	0.868575		cds-WP_005245026.1	1		cds-WP_005239620.1	0.615076		cds-WP_005252469.1	0.641186		cds-WP_005251155.1	0.956534
cds-WP_005245031.1	1		cds-WP_005245031.1	1		cds-WP_005240001.1	0.868521		cds-WP_005245031.1	1		cds-WP_005239642.1	0.615076		cds-WP_005248847.1	0.641129		cds-WP_164709508.1	0.956523
cds-WP_005245035.1	1		cds-WP_005245035.1	1		cds-WP_005239414.1	0.868407		cds-WP_005245035.1	1		cds-WP_005239644.1	0.615076		cds-WP_005251906.1	0.640766		cds-WP_005244829.1	0.956475
cds-WP_005245036.1	1		cds-WP_005245036.1	1		cds-WP_226955749.1	0.868353		cds-WP_005245036.1	1		cds-WP_005239658.1	0.615076		cds-WP_025433288.1	0.6404		cds-WP_005248154.1	0.956453
cds-WP_005245250.1	1		cds-WP_005245250.1	1		cds-WP_025431999.1	0.868022		cds-WP_005245250.1	1		cds-WP_005239660.1	0.615076		cds-WP_005244387.1	0.640334		cds-WP_005248583.1	0.956381
cds-WP_005245256.1	1		cds-WP_005245256.1	1		cds-WP_005239384.1	0.867744		cds-WP_005245256.1	1		cds-WP_005239691.1	0.615076		cds-WP_005252404.1	0.6401		cds-WP_005247511.1	0.95638
cds-WP_005245309.1	1		cds-WP_005245309.1	1		cds-WP_005238894.1	0.867731		cds-WP_005245309.1	1		cds-WP_005239719.1	0.615076		cds-WP_005252945.1	0.639946		cds-WP_005241721.1	0.956339
cds-WP_005245521.1	1		cds-WP_005245521.1	1		cds-WP_005249767.1	0.867628		cds-WP_005245521.1	1		cds-WP_005239729.1	0.615076		cds-WP_005247497.1	0.639846		cds-WP_037183094.1	0.956337
cds-WP_005246065.1	1		cds-WP_005246065.1	1		cds-WP_005237782.1	0.867564		cds-WP_005246065.1	1		cds-WP_005239745.1	0.615076		cds-WP_005252807.1	0.639697		cds-WP_005251827.1	0.956275
cds-WP_005246068.1	1		cds-WP_005246068.1	1		cds-WP_005238920.1	0.867485		cds-WP_005246068.1	1		cds-WP_005239818.1	0.615076		cds-WP_005252894.1	0.639611		cds-WP_025432919.1	0.956264
cds-WP_005246070.1	1		cds-WP_005246070.1	1		cds-WP_005240102.1	0.867101		cds-WP_005246070.1	1		cds-WP_005239822.1	0.615076		cds-WP_005239887.1	0.639558		cds-WP_005243625.1	0.956215
cds-WP_005246071.1	1		cds-WP_005246071.1	1		cds-WP_226955703.1	0.866997		cds-WP_005246071.1	1		cds-WP_005239831.1	0.615076		cds-WP_037179660.1	0.639275		cds-WP_025431934.1	0.956209
cds-WP_005246074.1	1		cds-WP_005246074.1	1		cds-WP_025433135.1	0.866964		cds-WP_005246074.1	1		cds-WP_005239857.1	0.615076		cds-WP_005246295.1	0.639043		cds-WP_005248584.1	0.956142
cds-WP_005246078.1	1		cds-WP_005246078.1	1		cds-WP_025431779.1	0.866866		cds-WP_005246078.1	1		cds-WP_005239862.1	0.615076		cds-WP_005241311.1	0.639025		cds-WP_005243623.1	0.956132
cds-WP_005246079.1	1		cds-WP_005246079.1	1		cds-WP_005573961.1	0.866728		cds-WP_005246079.1	1		cds-WP_005239873.1	0.615076		cds-WP_005249207.1	0.638825		cds-WP_005248320.1	0.956131
cds-WP_005246086.1	1		cds-WP_005246086.1	1		cds-WP_005244857.1	0.866677		cds-WP_005246086.1	1		cds-WP_005239891.1	0.615076		cds-WP_005240064.1	0.638781		cds-WP_005252221.1	0.956021
cds-WP_005246087.1	1		cds-WP_005246087.1	1		cds-WP_025433089.1	0.866539		cds-WP_005246087.1	1		cds-WP_005239892.1	0.615076		cds-WP_025431899.1	0.638294		cds-WP_025432065.1	0.955995
cds-WP_005246094.1	1		cds-WP_005246094.1	1		cds-WP_005248816.1	0.866534		cds-WP_005246094.1	1		cds-WP_005239918.1	0.615076		cds-WP_005249122.1	0.638259		cds-WP_005246368.1	0.95598
cds-WP_005246101.1	1		cds-WP_005246101.1	1		cds-WP_005252199.1	0.866484		cds-WP_005246101.1	1		cds-WP_005239926.1	0.615076		cds-WP_005248477.1	0.638231		cds-WP_015889975.1	0.955931
cds-WP_005246120.1	1		cds-WP_005246120.1	1		cds-WP_005244597.1	0.86623		cds-WP_005246120.1	1		cds-WP_005239930.1	0.615076		cds-WP_005242115.1	0.637738		cds-WP_025432525.1	0.955921
cds-WP_005246128.1	1		cds-WP_005246128.1	1		cds-WP_226955687.1	0.866087		cds-WP_005246128.1	1		cds-WP_005239938.1	0.615076		cds-WP_005251814.1	0.637197		cds-WP_005244413.1	0.955916
cds-WP_005246185.1	1		cds-WP_005246185.1	1		cds-WP_005238076.1	0.865823		cds-WP_005246185.1	1		cds-WP_005239940.1	0.615076		cds-WP_005244531.1	0.637117		cds-WP_005238097.1	0.955843
cds-WP_005246207.1	1		cds-WP_005246207.1	1		cds-WP_005248320.1	0.865648		cds-WP_005246207.1	1		cds-WP_005239966.1	0.615076		cds-WP_005242052.1	0.637101		cds-WP_005244078.1	0.955801
cds-WP_005246211.1	1		cds-WP_005246211.1	1		cds-WP_025431921.1	0.865528		cds-WP_005246211.1	1		cds-WP_005239990.1	0.615076		cds-WP_025433390.1	0.637025		cds-WP_005240748.1	0.955792
cds-WP_005246218.1	1		cds-WP_005246218.1	1		cds-WP_025433051.1	0.865313		cds-WP_005246218.1	1		cds-WP_005240001.1	0.615076		cds-WP_005248253.1	0.636956		cds-WP_005239159.1	0.955748
cds-WP_005246233.1	1		cds-WP_005246233.1	1		cds-WP_005238454.1	0.865207		cds-WP_005246233.1	1		cds-WP_005240011.1	0.615076		cds-WP_005238598.1	0.636597		cds-WP_025433235.1	0.955741
cds-WP_005246240.1	1		cds-WP_005246240.1	1		cds-WP_143767454.1	0.865103		cds-WP_005246240.1	1		cds-WP_005240029.1	0.615076		cds-WP_025431790.1	0.636584		cds-WP_005252469.1	0.955588
cds-WP_005246276.1	1		cds-WP_005246276.1	1		cds-WP_005250807.1	0.865009		cds-WP_005246276.1	1		cds-WP_005240047.1	0.615076		cds-WP_037179317.1	0.636531		cds-WP_005240130.1	0.955564
cds-WP_005246296.1	1		cds-WP_005246296.1	1		cds-WP_025432418.1	0.864797		cds-WP_005246296.1	1		cds-WP_005240050.1	0.615076		cds-WP_005246502.1	0.636389		cds-WP_025433073.1	0.955531
cds-WP_005246309.1	1		cds-WP_005246309.1	1		cds-WP_025433003.1	0.864796		cds-WP_005246309.1	1		cds-WP_005240062.1	0.615076		cds-WP_005243551.1	0.636215		cds-WP_025432523.1	0.955492
cds-WP_005246311.1	1		cds-WP_005246311.1	1		cds-WP_005251655.1	0.864724		cds-WP_005246311.1	1		cds-WP_005240066.1	0.615076		cds-WP_025433311.1	0.635994		cds-WP_005248040.1	0.955481
cds-WP_005246327.1	1		cds-WP_005246327.1	1		cds-WP_005251635.1	0.864556		cds-WP_005246327.1	1		cds-WP_005240079.1	0.615076		cds-WP_025433081.1	0.635706		cds-WP_025431830.1	0.955463
cds-WP_005246333.1	1		cds-WP_005246333.1	1		cds-WP_025432880.1	0.864458		cds-WP_005246333.1	1		cds-WP_005240095.1	0.615076		cds-WP_005241821.1	0.635049		cds-WP_005240808.1	0.955446
cds-WP_005246337.1	1		cds-WP_005246337.1	1		cds-WP_005244618.1	0.864384		cds-WP_005246337.1	1		cds-WP_005240102.1	0.615076		cds-WP_005238857.1	0.634679		cds-WP_025431774.1	0.955386
cds-WP_005246351.1	1		cds-WP_005246351.1	1		cds-WP_005244010.1	0.864375		cds-WP_005246351.1	1		cds-WP_005240103.1	0.615076		cds-WP_025432929.1	0.634643		cds-WP_005248635.1	0.955369
cds-WP_005246352.1	1		cds-WP_005246352.1	1		cds-WP_005246426.1	0.864312		cds-WP_005246352.1	1		cds-WP_005240106.1	0.615076		cds-WP_179443392.1	0.634492		cds-WP_005252571.1	0.955346
cds-WP_005246353.1	1		cds-WP_005246353.1	1		cds-WP_005242974.1	0.864285		cds-WP_005246353.1	1		cds-WP_005240135.1	0.615076		cds-WP_005238950.1	0.634457		cds-WP_005250971.1	0.955238
cds-WP_005246369.1	1		cds-WP_005246369.1	1		cds-WP_005244337.1	0.864258		cds-WP_005246369.1	1		cds-WP_005240142.1	0.615076		cds-WP_005244696.1	0.634411		cds-WP_005240466.1	0.955215
cds-WP_005246375.1	1		cds-WP_005246375.1	1		cds-WP_005251525.1	0.86421		cds-WP_005246375.1	1		cds-WP_005240152.1	0.615076		cds-WP_025431997.1	0.633935		cds-WP_005246658.1	0.955198
cds-WP_005246379.1	1		cds-WP_005246379.1	1		cds-WP_005244840.1	0.864201		cds-WP_005246379.1	1		cds-WP_005240177.1	0.615076		cds-WP_005243170.1	0.633922		cds-WP_005240232.1	0.955185
cds-WP_005246395.1	1		cds-WP_005246395.1	1		cds-WP_005252934.1	0.86419		cds-WP_005246395.1	1		cds-WP_005240184.1	0.615076		cds-WP_005243856.1	0.633431		cds-WP_005248644.1	0.955168
cds-WP_005246397.1	1		cds-WP_005246397.1	1		cds-WP_005251668.1	0.864042		cds-WP_005246397.1	1		cds-WP_005240205.1	0.615076		cds-WP_005252956.1	0.633193		cds-WP_005238758.1	0.955156
cds-WP_005246398.1	1		cds-WP_005246398.1	1		cds-WP_005243547.1	0.864007		cds-WP_005246398.1	1		cds-WP_005240218.1	0.615076		cds-WP_206033988.1	0.633172		cds-WP_025431867.1	0.955092
cds-WP_005246399.1	1		cds-WP_005246399.1	1		cds-WP_005251258.1	0.863969		cds-WP_005246399.1	1		cds-WP_005240220.1	0.615076		cds-WP_143767454.1	0.6331		cds-WP_025431670.1	0.955089
cds-WP_005246405.1	1		cds-WP_005246405.1	1		cds-WP_005246327.1	0.863963		cds-WP_005246405.1	1		cds-WP_005240222.1	0.615076		cds-WP_005244465.1	0.632968		cds-WP_009479645.1	0.95497
cds-WP_005246426.1	1		cds-WP_005246426.1	1		cds-WP_025431947.1	0.863956		cds-WP_005246426.1	1		cds-WP_005240226.1	0.615076		cds-WP_005240779.1	0.63295		cds-WP_005252395.1	0.954918
cds-WP_005246430.1	1		cds-WP_005246430.1	1		cds-WP_025432064.1	0.863826		cds-WP_005246430.1	1		cds-WP_005240232.1	0.615076		cds-WP_005249483.1	0.632716		cds-WP_025432327.1	0.954891
cds-WP_005246496.1	1		cds-WP_005246496.1	1		cds-WP_025432335.1	0.863752		cds-WP_005246496.1	1		cds-WP_005240246.1	0.615076		cds-WP_005242824.1	0.632586		cds-WP_025431769.1	0.954876
cds-WP_005246502.1	1		cds-WP_005246502.1	1		cds-WP_005239511.1	0.863678		cds-WP_005246502.1	1		cds-WP_005240266.1	0.615076		cds-WP_005249087.1	0.631909		cds-WP_005238788.1	0.954811
cds-WP_005246518.1	1		cds-WP_005246518.1	1		cds-WP_005243645.1	0.863655		cds-WP_005246518.1	1		cds-WP_005240272.1	0.615076		cds-WP_005254252.1	0.631714		cds-WP_005251520.1	0.954725
cds-WP_005246520.1	1		cds-WP_005246520.1	1		cds-WP_025433250.1	0.863613		cds-WP_005246520.1	1		cds-WP_005240273.1	0.615076		cds-WP_005241721.1	0.631547		cds-WP_005238498.1	0.954671
cds-WP_005246592.1	1		cds-WP_005246592.1	1		cds-WP_005248255.1	0.863595		cds-WP_005246592.1	1		cds-WP_005240282.1	0.615076		cds-WP_025431634.1	0.631067		cds-WP_025432407.1	0.954645
cds-WP_005246599.1	1		cds-WP_005246599.1	1		cds-WP_025432128.1	0.863243		cds-WP_005246599.1	1		cds-WP_005240297.1	0.615076		cds-WP_005237760.1	0.630825		cds-WP_005243714.1	0.954476
cds-WP_005246602.1	1		cds-WP_005246602.1	1		cds-K2Z90_RS31845	0.863162		cds-WP_005246602.1	1		cds-WP_005240310.1	0.615076		cds-WP_226955668.1	0.630774		cds-WP_005247430.1	0.95443
cds-WP_005246612.1	1		cds-WP_005246612.1	1		cds-WP_025433391.1	0.863132		cds-WP_005246612.1	1		cds-WP_005240319.1	0.615076		cds-WP_025431685.1	0.630704		cds-WP_005248479.1	0.954363
cds-WP_005246620.1	1		cds-WP_005246620.1	1		cds-WP_025432210.1	0.863115		cds-WP_005246620.1	1		cds-WP_005240323.1	0.615076		cds-WP_025432070.1	0.630659		cds-WP_025431745.1	0.95436
cds-WP_005246650.1	1		cds-WP_005246650.1	1		cds-WP_005249166.1	0.862924		cds-WP_005246650.1	1		cds-WP_005240325.1	0.615076		cds-WP_005245035.1	0.630499		cds-WP_025431843.1	0.954311
cds-WP_005246654.1	1		cds-WP_005246654.1	1		cds-WP_005251189.1	0.86284		cds-WP_005246654.1	1		cds-WP_005240336.1	0.615076		cds-WP_005260190.1	0.630366		cds-WP_005252328.1	0.954267
cds-WP_005246658.1	1		cds-WP_005246658.1	1		cds-WP_025432598.1	0.862757		cds-WP_005246658.1	1		cds-WP_005240338.1	0.615076		cds-WP_005238602.1	0.630294		cds-WP_005247475.1	0.954185
cds-WP_005246675.1	1		cds-WP_005246675.1	1		cds-WP_005243653.1	0.86266		cds-WP_005246675.1	1		cds-WP_005240340.1	0.615076		cds-WP_005237798.1	0.630138		cds-WP_005243789.1	0.954161
cds-WP_005246676.1	1		cds-WP_005246676.1	1		cds-WP_025431598.1	0.86211		cds-WP_005246676.1	1		cds-WP_005240344.1	0.615076		cds-WP_025431858.1	0.629979		cds-WP_025433219.1	0.954046
cds-WP_005246678.1	1		cds-WP_005246678.1	1		cds-WP_005244098.1	0.862018		cds-WP_005246678.1	1		cds-WP_005240359.1	0.615076		cds-WP_005252870.1	0.629935		cds-WP_005243060.1	0.954013
cds-WP_005247177.1	1		cds-WP_005247177.1	1		cds-WP_025432930.1	0.861975		cds-WP_005247177.1	1		cds-WP_005240365.1	0.615076		cds-WP_143548702.1	0.629935		cds-WP_005238590.1	0.953869
cds-WP_005247281.1	1		cds-WP_005247281.1	1		cds-WP_005243649.1	0.861962		cds-WP_005247281.1	1		cds-WP_005240383.1	0.615076		cds-WP_025432379.1	0.62966		cds-WP_025433003.1	0.953755
cds-WP_005247359.1	1		cds-WP_005247359.1	1		cds-K2Z90_RS12350	0.86194		cds-WP_005247359.1	1		cds-WP_005240388.1	0.615076		cds-WP_005252792.1	0.629626		cds-WP_005252944.1	0.95371
cds-WP_005247363.1	1		cds-WP_005247363.1	1		cds-WP_025431796.1	0.861868		cds-WP_005247363.1	1		cds-WP_005240402.1	0.615076		cds-WP_226955698.1	0.629397		cds-WP_005239872.1	0.953682
cds-WP_005247366.1	1		cds-WP_005247366.1	1		cds-WP_005240310.1	0.861785		cds-WP_005247366.1	1		cds-WP_005240414.1	0.615076		cds-WP_080578304.1	0.629395		cds-WP_025432368.1	0.953676
cds-WP_005247372.1	1		cds-WP_005247372.1	1		cds-WP_005249132.1	0.861768		cds-WP_005247372.1	1		cds-WP_005240416.1	0.615076		cds-WP_025432056.1	0.629331		cds-WP_025432896.1	0.953672
cds-WP_005247382.1	1		cds-WP_005247382.1	1		cds-WP_005239633.1	0.86175		cds-WP_005247382.1	1		cds-WP_005240427.1	0.615076		cds-WP_025431733.1	0.628367		cds-WP_005252900.1	0.953667
cds-WP_005247408.1	1		cds-WP_005247408.1	1		cds-WP_025431964.1	0.861724		cds-WP_005247408.1	1		cds-WP_005240429.1	0.615076		cds-WP_005239966.1	0.62832		cds-WP_025431844.1	0.953665
cds-WP_005247422.1	1		cds-WP_005247422.1	1		cds-WP_025432555.1	0.861673		cds-WP_005247422.1	1		cds-WP_005240440.1	0.615076		cds-WP_005242408.1	0.628254		cds-WP_005252942.1	0.953656
cds-WP_005247430.1	1		cds-WP_005247430.1	1		cds-WP_025432905.1	0.861585		cds-WP_005247430.1	1		cds-WP_005240442.1	0.615076		cds-WP_005244016.1	0.628164		cds-WP_005237785.1	0.953655
cds-WP_005247432.1	1		cds-WP_005247432.1	1		cds-WP_005244999.1	0.861443		cds-WP_005247432.1	1		cds-WP_005240477.1	0.615076		cds-WP_025432262.1	0.628036		cds-WP_005244158.1	0.953639
cds-WP_005247450.1	1		cds-WP_005247450.1	1		cds-WP_005251856.1	0.861378		cds-WP_005247450.1	1		cds-WP_005240486.1	0.615076		cds-WP_025432241.1	0.628019		cds-WP_005250817.1	0.953617
cds-WP_005247472.1	1		cds-WP_005247472.1	1		cds-WP_005249208.1	0.861365		cds-WP_005247472.1	1		cds-WP_005240490.1	0.615076		cds-WP_005247738.1	0.627616		cds-WP_005249094.1	0.953605
cds-WP_005247479.1	1		cds-WP_005247479.1	1		cds-WP_025432263.1	0.861283		cds-WP_005247479.1	1		cds-WP_005240514.1	0.615076		cds-WP_005238769.1	0.627416		cds-WP_005251689.1	0.953587
cds-WP_005247482.1	1		cds-WP_005247482.1	1		cds-WP_025433612.1	0.861228		cds-WP_005247482.1	1		cds-WP_005240533.1	0.615076		cds-WP_005240808.1	0.627312		cds-WP_005252943.1	0.953546
cds-WP_005247484.1	1		cds-WP_005247484.1	1		cds-WP_226955681.1	0.861097		cds-WP_005247484.1	1		cds-WP_005240537.1	0.615076		cds-WP_005252247.1	0.627301		cds-WP_005251368.1	0.953493
cds-WP_005247497.1	1		cds-WP_005247497.1	1		cds-WP_005239508.1	0.86105		cds-WP_005247497.1	1		cds-WP_005240557.1	0.615076		cds-WP_025433391.1	0.6273		cds-WP_005244860.1	0.953444
cds-WP_005247506.1	1		cds-WP_005247506.1	1		cds-WP_025431615.1	0.860993		cds-WP_005247506.1	1		cds-WP_005240559.1	0.615076		cds-WP_005239852.1	0.62698		cds-WP_025432516.1	0.953435
cds-WP_005247511.1	1		cds-WP_005247511.1	1		cds-WP_003936084.1	0.860943		cds-WP_005247511.1	1		cds-WP_005240572.1	0.615076		cds-WP_005249310.1	0.626959		cds-WP_025431781.1	0.953117
cds-WP_005247513.1	1		cds-WP_005247513.1	1		cds-WP_005248975.1	0.860698		cds-WP_005247513.1	1		cds-WP_005240577.1	0.615076		cds-WP_025431960.1	0.626559		cds-WP_005240845.1	0.953101
cds-WP_005247517.1	1		cds-WP_005247517.1	1		cds-WP_005252304.1	0.860651		cds-WP_005247517.1	1		cds-WP_005240589.1	0.615076		cds-WP_025432557.1	0.626492		cds-WP_005246592.1	0.953073
cds-WP_005247522.1	1		cds-WP_005247522.1	1		cds-WP_005251522.1	0.860631		cds-WP_005247522.1	1		cds-WP_005240596.1	0.615076		cds-WP_005248582.1	0.626111		cds-WP_005238900.1	0.953051
cds-WP_005247527.1	1		cds-WP_005247527.1	1		cds-WP_005241367.1	0.860492		cds-WP_005247527.1	1		cds-WP_005240598.1	0.615076		cds-WP_005242400.1	0.625986		cds-WP_005237939.1	0.953011
cds-WP_005247559.1	1		cds-WP_005247559.1	1		cds-WP_005240158.1	0.860481		cds-WP_005247559.1	1		cds-WP_005240600.1	0.615076		cds-WP_005240921.1	0.62596		cds-WP_025432000.1	0.952977
cds-WP_005247561.1	1		cds-WP_005247561.1	1		cds-WP_005238098.1	0.860392		cds-WP_005247561.1	1		cds-WP_005240606.1	0.615076		cds-WP_080578158.1	0.62563		cds-WP_005252063.1	0.952835
cds-WP_005247564.1	1		cds-WP_005247564.1	1		cds-WP_226955665.1	0.860269		cds-WP_005247564.1	1		cds-WP_005240620.1	0.615076		cds-WP_005249245.1	0.625586		cds-WP_226955487.1	0.952788
cds-WP_005247566.1	1		cds-WP_005247566.1	1		cds-WP_005250987.1	0.860141		cds-WP_005247566.1	1		cds-WP_005240630.1	0.615076		cds-WP_025433024.1	0.625392		cds-WP_005238995.1	0.952781
cds-WP_005247567.1	1		cds-WP_005247567.1	1		cds-WP_005252780.1	0.860113		cds-WP_005247567.1	1		cds-WP_005240632.1	0.615076		cds-WP_005244413.1	0.625351		cds-WP_005248119.1	0.952757
cds-WP_005247569.1	1		cds-WP_005247569.1	1		cds-WP_005247432.1	0.86005		cds-WP_005247569.1	1		cds-WP_005240640.1	0.615076		cds-WP_005246398.1	0.625092		cds-WP_005240097.1	0.952756
cds-WP_005247571.1	1		cds-WP_005247571.1	1		cds-WP_005252077.1	0.859987		cds-WP_005247571.1	1		cds-WP_005240669.1	0.615076		cds-WP_025431873.1	0.624635		cds-WP_005261240.1	0.952738
cds-WP_005247575.1	1		cds-WP_005247575.1	1		cds-WP_005252714.1	0.859941		cds-WP_005247575.1	1		cds-WP_005240671.1	0.615076		cds-WP_025432421.1	0.624553		cds-WP_005251081.1	0.952735
cds-WP_005247584.1	1		cds-WP_005247584.1	1		cds-WP_005251009.1	0.859869		cds-WP_005247584.1	1		cds-WP_005240683.1	0.615076		cds-WP_005244097.1	0.624371		cds-WP_043943825.1	0.952639
cds-WP_005247587.1	1		cds-WP_005247587.1	1		cds-WP_005252827.1	0.859844		cds-WP_005247587.1	1		cds-WP_005240710.1	0.615076		cds-WP_025432398.1	0.624147		cds-WP_005568279.1	0.952596
cds-WP_005247591.1	1		cds-WP_005247591.1	1		cds-WP_005244056.1	0.859388		cds-WP_005247591.1	1		cds-WP_005240721.1	0.615076		cds-WP_005248350.1	0.624139		cds-WP_005239753.1	0.95248
cds-WP_005247612.1	1		cds-WP_005247612.1	1		cds-WP_005240630.1	0.859384		cds-WP_005247612.1	1		cds-WP_005240726.1	0.615076		cds-WP_005250493.1	0.62409		cds-WP_005251518.1	0.95247
cds-WP_005247625.1	1		cds-WP_005247625.1	1		cds-WP_005240969.1	0.859365		cds-WP_005247625.1	1		cds-WP_005240734.1	0.615076		cds-WP_005248329.1	0.623966		cds-WP_025432414.1	0.952432
cds-WP_005247630.1	1		cds-WP_005247630.1	1		cds-WP_005252958.1	0.859331		cds-WP_005247630.1	1		cds-WP_005240738.1	0.615076		cds-WP_005242133.1	0.623964		cds-WP_005244926.1	0.952338
cds-WP_005247637.1	1		cds-WP_005247637.1	1		cds-WP_025432954.1	0.859247		cds-WP_005247637.1	1		cds-WP_005240740.1	0.615076		cds-WP_005249862.1	0.623942		cds-WP_005244586.1	0.952226
cds-WP_005247640.1	1		cds-WP_005247640.1	1		cds-WP_005247612.1	0.859232		cds-WP_005247640.1	1		cds-WP_005240746.1	0.615076		cds-WP_037182611.1	0.623883		cds-WP_025433168.1	0.952186
cds-WP_005247642.1	1		cds-WP_005247642.1	1		cds-WP_005247937.1	0.859104		cds-WP_005247642.1	1		cds-WP_005240748.1	0.615076		cds-WP_025432336.1	0.623751		cds-WP_005252057.1	0.952041
cds-WP_005247649.1	1		cds-WP_005247649.1	1		cds-WP_025432191.1	0.859009		cds-WP_005247649.1	1		cds-WP_005240749.1	0.615076		cds-WP_005252922.1	0.623377		cds-WP_005244531.1	0.95204
cds-WP_005247657.1	1		cds-WP_005247657.1	1		cds-WP_005248812.1	0.858837		cds-WP_005247657.1	1		cds-WP_005240760.1	0.615076		cds-WP_005241829.1	0.623345		cds-WP_025433393.1	0.952038
cds-WP_005247659.1	1		cds-WP_005247659.1	1		cds-WP_037182782.1	0.858683		cds-WP_005247659.1	1		cds-WP_005240773.1	0.615076		cds-WP_005242821.1	0.6231		cds-WP_025432198.1	0.951942
cds-WP_005247669.1	1		cds-WP_005247669.1	1		cds-WP_005239940.1	0.858669		cds-WP_005247669.1	1		cds-WP_005240783.1	0.615076		cds-WP_025431753.1	0.6231		cds-WP_005566972.1	0.951912
cds-WP_005247681.1	1		cds-WP_005247681.1	1		cds-WP_005240731.1	0.858637		cds-WP_005247681.1	1		cds-WP_005240799.1	0.615076		cds-WP_005248783.1	0.623083		cds-WP_005246676.1	0.951874
cds-WP_005247697.1	1		cds-WP_005247697.1	1		cds-WP_025433015.1	0.858585		cds-WP_005247697.1	1		cds-WP_005240826.1	0.615076		cds-WP_005248611.1	0.623041		cds-WP_005250096.1	0.951868
cds-WP_005247706.1	1		cds-WP_005247706.1	1		cds-WP_005238847.1	0.858533		cds-WP_005247706.1	1		cds-WP_005240828.1	0.615076		cds-WP_005251573.1	0.622928		cds-WP_005247891.1	0.951776
cds-WP_005247710.1	1		cds-WP_005247710.1	1		cds-WP_005240427.1	0.858512		cds-WP_005247710.1	1		cds-WP_005240833.1	0.615076		cds-WP_005248124.1	0.622907		cds-WP_005251671.1	0.951756
cds-WP_005247733.1	1		cds-WP_005247733.1	1		cds-WP_005244863.1	0.85842		cds-WP_005247733.1	1		cds-WP_005240834.1	0.615076		cds-WP_005245256.1	0.622895		cds-WP_005251009.1	0.9517
cds-WP_005247736.1	1		cds-WP_005247736.1	1		cds-WP_025431860.1	0.858243		cds-WP_005247736.1	1		cds-WP_005240849.1	0.615076		cds-WP_005252398.1	0.622334		cds-WP_005239736.1	0.95158
cds-WP_005247738.1	1		cds-WP_005247738.1	1		cds-WP_025432119.1	0.858065		cds-WP_005247738.1	1		cds-WP_005240851.1	0.615076		cds-WP_025433210.1	0.622127		cds-WP_005250559.1	0.951559
cds-WP_005247759.1	1		cds-WP_005247759.1	1		cds-WP_005242907.1	0.857993		cds-WP_005247759.1	1		cds-WP_005240853.1	0.615076		cds-WP_005238876.1	0.622004		cds-WP_005252933.1	0.951455
cds-WP_005247765.1	1		cds-WP_005247765.1	1		cds-WP_025432823.1	0.857964		cds-WP_005247765.1	1		cds-WP_005240866.1	0.615076		cds-WP_226955804.1	0.621843		cds-WP_005240721.1	0.951444
cds-WP_005247766.1	1		cds-WP_005247766.1	1		cds-WP_025431984.1	0.857731		cds-WP_005247766.1	1		cds-WP_005240878.1	0.615076		cds-WP_005244348.1	0.621679		cds-WP_005240340.1	0.951408
cds-WP_005247768.1	1		cds-WP_005247768.1	1		cds-WP_005238965.1	0.857568		cds-WP_005247768.1	1		cds-WP_005240884.1	0.615076		cds-WP_005249167.1	0.621559		cds-WP_005244897.1	0.951369
cds-WP_005247770.1	1		cds-WP_005247770.1	1		cds-WP_005251233.1	0.857566		cds-WP_005247770.1	1		cds-WP_005240899.1	0.615076		cds-WP_005248838.1	0.621548		cds-WP_005248844.1	0.951283
cds-WP_005247772.1	1		cds-WP_005247772.1	1		cds-WP_005239374.1	0.857424		cds-WP_005247772.1	1		cds-WP_005240901.1	0.615076		cds-WP_005250880.1	0.621363		cds-WP_037179094.1	0.951272
cds-WP_005247783.1	1		cds-WP_005247783.1	1		cds-WP_005247765.1	0.857343		cds-WP_005247783.1	1		cds-WP_005240903.1	0.615076		cds-WP_005237854.1	0.621284		cds-WP_005240744.1	0.951237
cds-WP_005247785.1	1		cds-WP_005247785.1	1		cds-WP_005237830.1	0.857098		cds-WP_005247785.1	1		cds-WP_005240904.1	0.615076		cds-WP_005240246.1	0.621165		cds-WP_005243881.1	0.951211
cds-WP_005247817.1	1		cds-WP_005247817.1	1		cds-WP_005244422.1	0.857024		cds-WP_005247817.1	1		cds-WP_005240909.1	0.615076		cds-WP_231914324.1	0.62099		cds-WP_025431679.1	0.951201
cds-WP_005247827.1	1		cds-WP_005247827.1	1		cds-WP_025432516.1	0.85681		cds-WP_005247827.1	1		cds-WP_005240914.1	0.615076		cds-WP_005239448.1	0.620321		cds-WP_025433422.1	0.951147
cds-WP_005247836.1	1		cds-WP_005247836.1	1		cds-WP_005247785.1	0.856727		cds-WP_005247836.1	1		cds-WP_005240923.1	0.615076		cds-WP_005249677.1	0.620273		cds-WP_025432003.1	0.951126
cds-WP_005247840.1	1		cds-WP_005247840.1	1		cds-WP_005252015.1	0.856652		cds-WP_005247840.1	1		cds-WP_005240942.1	0.615076		cds-WP_005243835.1	0.619936		cds-WP_005242357.1	0.951101
cds-WP_005247842.1	1		cds-WP_005247842.1	1		cds-WP_005249229.1	0.85664		cds-WP_005247842.1	1		cds-WP_005240992.1	0.615076		cds-WP_005240494.1	0.619773		cds-WP_025432532.1	0.951096
cds-WP_005247843.1	1		cds-WP_005247843.1	1		cds-WP_005241014.1	0.85662		cds-WP_005247843.1	1		cds-WP_005241002.1	0.615076		cds-WP_005237807.1	0.619692		cds-WP_025431688.1	0.951034
cds-WP_005247855.1	1		cds-WP_005247855.1	1		cds-WP_005237792.1	0.856517		cds-WP_005247855.1	1		cds-WP_005241006.1	0.615076		cds-WP_005242725.1	0.619482		cds-WP_005247983.1	0.951016
cds-WP_005247861.1	1		cds-WP_005247861.1	1		cds-WP_005249677.1	0.856449		cds-WP_005247861.1	1		cds-WP_005241036.1	0.615076		cds-WP_179443301.1	0.619359		cds-WP_005250950.1	0.950942
cds-WP_005247870.1	1		cds-WP_005247870.1	1		cds-WP_005243655.1	0.856373		cds-WP_005247870.1	1		cds-WP_005241278.1	0.615076		cds-WP_025432397.1	0.619244		cds-WP_005256362.1	0.95089
cds-WP_005247888.1	1		cds-WP_005247888.1	1		cds-WP_005240910.1	0.856203		cds-WP_005247888.1	1		cds-WP_005241311.1	0.615076		cds-WP_264297276.1	0.61872		cds-K2Z90_RS22950	0.950858
cds-WP_005247891.1	1		cds-WP_005247891.1	1		cds-WP_005238721.1	0.856168		cds-WP_005247891.1	1		cds-WP_005241367.1	0.615076		cds-WP_005239314.1	0.618711		cds-WP_005264833.1	0.95084
cds-WP_005247895.1	1		cds-WP_005247895.1	1		cds-WP_025432533.1	0.856123		cds-WP_005247895.1	1		cds-WP_005241369.1	0.615076		cds-WP_005244599.1	0.61816		cds-WP_005240469.1	0.950725
cds-WP_005247896.1	1		cds-WP_005247896.1	1		cds-WP_005239455.1	0.855994		cds-WP_005247896.1	1		cds-WP_005241386.1	0.615076		cds-WP_005248085.1	0.617993		cds-WP_025431835.1	0.950618
cds-WP_005247909.1	1		cds-WP_005247909.1	1		cds-WP_226955685.1	0.855923		cds-WP_005247909.1	1		cds-WP_005241413.1	0.615076		cds-WP_005244859.1	0.617736		cds-WP_005249166.1	0.950615
cds-WP_005247912.1	1		cds-WP_005247912.1	1		cds-WP_005244524.1	0.855869		cds-WP_005247912.1	1		cds-WP_005241423.1	0.615076		cds-WP_025431999.1	0.617419		cds-WP_025433022.1	0.950565
cds-WP_005247916.1	1		cds-WP_005247916.1	1		cds-WP_005248511.1	0.855852		cds-WP_005247916.1	1		cds-WP_005241538.1	0.615076		cds-WP_005249850.1	0.617308		cds-WP_005261286.1	0.950533
cds-WP_005247928.1	1		cds-WP_005247928.1	1		cds-WP_005238875.1	0.855798		cds-WP_005247928.1	1		cds-WP_005241539.1	0.615076		cds-WP_005252380.1	0.617096		cds-WP_037180845.1	0.950418
cds-WP_005247930.1	1		cds-WP_005247930.1	1		cds-WP_005237864.1	0.85579		cds-WP_005247930.1	1		cds-WP_005241543.1	0.615076		cds-WP_005251979.1	0.616703		cds-WP_005248035.1	0.950122
cds-WP_005247937.1	1		cds-WP_005247937.1	1		cds-WP_025432336.1	0.855671		cds-WP_005247937.1	1		cds-WP_005241554.1	0.615076		cds-WP_005252104.1	0.616053		cds-WP_005248937.1	0.950112
cds-WP_005247940.1	1		cds-WP_005247940.1	1		cds-WP_226955686.1	0.855644		cds-WP_005247940.1	1		cds-WP_005241606.1	0.615076		cds-WP_005243954.1	0.616006		cds-WP_005242938.1	0.950088
cds-WP_005247951.1	1		cds-WP_005247951.1	1		cds-WP_005244847.1	0.855602		cds-WP_005247951.1	1		cds-WP_005241608.1	0.615076		cds-WP_005244501.1	0.61535		cds-WP_005244607.1	0.949998
cds-WP_005247957.1	1		cds-WP_005247957.1	1		cds-WP_005240566.1	0.855485		cds-WP_005247957.1	1		cds-WP_005241611.1	0.615076		cds-WP_025431912.1	0.615178		cds-WP_005240814.1	0.949953
cds-WP_005247958.1	1		cds-WP_005247958.1	1		cds-WP_005243040.1	0.855274		cds-WP_005247958.1	1		cds-WP_005241637.1	0.615076		cds-WP_005241006.1	0.614826		cds-WP_005248821.1	0.949925
cds-WP_005247962.1	1		cds-WP_005247962.1	1		cds-WP_005243056.1	0.85522		cds-WP_005247962.1	1		cds-WP_005241654.1	0.615076		cds-WP_005240727.1	0.614634		cds-WP_005244232.1	0.949917
cds-WP_005247973.1	1		cds-WP_005247973.1	1		cds-WP_005240147.1	0.854933		cds-WP_005247973.1	1		cds-WP_005241656.1	0.615076		cds-WP_005246359.1	0.614313		cds-WP_005243722.1	0.949847
cds-WP_005247975.1	1		cds-WP_005247975.1	1		cds-WP_005244325.1	0.854869		cds-WP_005247975.1	1		cds-WP_005241670.1	0.615076		cds-WP_025432344.1	0.61428		cds-WP_005238894.1	0.949829
cds-WP_005247978.1	1		cds-WP_005247978.1	1		cds-WP_005242408.1	0.854869		cds-WP_005247978.1	1		cds-WP_005241678.1	0.615076		cds-WP_005242751.1	0.614259		cds-WP_005248013.1	0.949819
cds-WP_005247980.1	1		cds-WP_005247980.1	1		cds-WP_005251099.1	0.854828		cds-WP_005247980.1	1		cds-WP_005241721.1	0.615076		cds-WP_025432053.1	0.614025		cds-WP_005247281.1	0.949747
cds-WP_005247983.1	1		cds-WP_005247983.1	1		cds-WP_037182611.1	0.854806		cds-WP_005247983.1	1		cds-WP_005241758.1	0.615076		cds-WP_226955706.1	0.613864		cds-WP_005238805.1	0.949712
cds-WP_005247989.1	1		cds-WP_005247989.1	1		cds-WP_025433069.1	0.854762		cds-WP_005247989.1	1		cds-WP_005241759.1	0.615076		cds-WP_005251233.1	0.613394		cds-WP_005246399.1	0.949686
cds-WP_005247990.1	1		cds-WP_005247990.1	1		cds-WP_005252021.1	0.854735		cds-WP_005247990.1	1		cds-WP_005241790.1	0.615076		cds-WP_005238528.1	0.613366		cds-WP_007300049.1	0.949607
cds-WP_005248013.1	1		cds-WP_005248013.1	1		cds-WP_005251685.1	0.854732		cds-WP_005248013.1	1		cds-WP_005241794.1	0.615076		cds-WP_005247891.1	0.613347		cds-WP_179443301.1	0.949544
cds-WP_005248030.1	1		cds-WP_005248030.1	1		cds-WP_005252012.1	0.854534		cds-WP_005248030.1	1		cds-WP_005241802.1	0.615076		cds-WP_005246203.1	0.613224		cds-WP_264297260.1	0.94954
cds-WP_005248040.1	1		cds-WP_005248040.1	1		cds-WP_025432872.1	0.854487		cds-WP_005248040.1	1		cds-WP_005241810.1	0.615076		cds-WP_005252892.1	0.612796		cds-WP_005242145.1	0.949484
cds-WP_005248048.1	1		cds-WP_005248048.1	1		cds-WP_005244553.1	0.854475		cds-WP_005248048.1	1		cds-WP_005241813.1	0.615076		cds-WP_005244816.1	0.612726		cds-WP_025433619.1	0.949466
cds-WP_005248057.1	1		cds-WP_005248057.1	1		cds-WP_025431910.1	0.854373		cds-WP_005248057.1	1		cds-WP_005241821.1	0.615076		cds-WP_025432992.1	0.612482		cds-WP_025432924.1	0.949369
cds-WP_005248077.1	1		cds-WP_005248077.1	1		cds-WP_005238125.1	0.854369		cds-WP_005248077.1	1		cds-WP_005241834.1	0.615076		cds-WP_005240740.1	0.612164		cds-WP_025432121.1	0.949362
cds-WP_005248085.1	1		cds-WP_005248085.1	1		cds-WP_005568279.1	0.854287		cds-WP_005248085.1	1		cds-WP_005241841.1	0.615076		cds-WP_025433229.1	0.612145		cds-WP_005252376.1	0.949319
cds-WP_005248105.1	1		cds-WP_005248105.1	1		cds-WP_226955797.1	0.854237		cds-WP_005248105.1	1		cds-WP_005241843.1	0.615076		cds-WP_005239302.1	0.611926		cds-WP_025432395.1	0.949268
cds-WP_005248111.1	1		cds-WP_005248111.1	1		cds-WP_005239502.1	0.854068		cds-WP_005248111.1	1		cds-WP_005241863.1	0.615076		cds-WP_025432251.1	0.61179		cds-WP_005241787.1	0.949217
cds-WP_005248114.1	1		cds-WP_005248114.1	1		cds-WP_005243170.1	0.854011		cds-WP_005248114.1	1		cds-WP_005241880.1	0.615076		cds-WP_005243714.1	0.611782		cds-WP_025431910.1	0.949062
cds-WP_005248116.1	1		cds-WP_005248116.1	1		cds-WP_005251384.1	0.85398		cds-WP_005248116.1	1		cds-WP_005241881.1	0.615076		cds-WP_005252082.1	0.611693		cds-WP_005250038.1	0.949012
cds-WP_005248124.1	1		cds-WP_005248124.1	1		cds-WP_005244182.1	0.853962		cds-WP_005248124.1	1		cds-WP_005242052.1	0.615076		cds-WP_005239232.1	0.611553		cds-WP_005252378.1	0.948999
cds-WP_005248139.1	1		cds-WP_005248139.1	1		cds-WP_025431744.1	0.85395		cds-WP_005248139.1	1		cds-WP_005242124.1	0.615076		cds-WP_005238784.1	0.611547		cds-WP_226955749.1	0.948943
cds-WP_005248141.1	1		cds-WP_005248141.1	1		cds-WP_025433165.1	0.853859		cds-WP_005248141.1	1		cds-WP_005242130.1	0.615076		cds-WP_025432084.1	0.611468		cds-WP_005247975.1	0.948787
cds-WP_005248152.1	1		cds-WP_005248152.1	1		cds-WP_005251547.1	0.853762		cds-WP_005248152.1	1		cds-WP_005242135.1	0.615076		cds-WP_005243203.1	0.611434		cds-WP_005252423.1	0.948766
cds-WP_005248163.1	1		cds-WP_005248163.1	1		cds-WP_005252368.1	0.853696		cds-WP_005248163.1	1		cds-WP_005242136.1	0.615076		cds-WP_061044208.1	0.611183		cds-WP_005252898.1	0.948755
cds-WP_005248166.1	1		cds-WP_005248166.1	1		cds-WP_005251383.1	0.853384		cds-WP_005248166.1	1		cds-WP_005242149.1	0.615076		cds-WP_226955526.1	0.611176		cds-WP_005240064.1	0.948747
cds-WP_005248168.1	1		cds-WP_005248168.1	1		cds-K2Z90_RS15955	0.85334		cds-WP_005248168.1	1		cds-WP_005242172.1	0.615076		cds-WP_005244469.1	0.611022		cds-WP_005244864.1	0.948725
cds-WP_005248181.1	1		cds-WP_005248181.1	1		cds-WP_005248465.1	0.853296		cds-WP_005248181.1	1		cds-WP_005242316.1	0.615076		cds-WP_005247916.1	0.611017		cds-WP_025433515.1	0.948725
cds-WP_005248193.1	1		cds-WP_005248193.1	1		cds-WP_005247482.1	0.853155		cds-WP_005248193.1	1		cds-WP_005242355.1	0.615076		cds-WP_005248635.1	0.610582		cds-WP_226955659.1	0.948667
cds-WP_005248199.1	1		cds-WP_005248199.1	1		cds-WP_005251670.1	0.853085		cds-WP_005248199.1	1		cds-WP_005242368.1	0.615076		cds-WP_005244435.1	0.610421		cds-WP_005251743.1	0.948662
cds-WP_005248208.1	1		cds-WP_005248208.1	1		cds-WP_005252057.1	0.853046		cds-WP_005248208.1	1		cds-WP_005242371.1	0.615076		cds-WP_005238781.1	0.610405		cds-WP_005244688.1	0.948615
cds-WP_005248217.1	1		cds-WP_005248217.1	1		cds-WP_005248783.1	0.853038		cds-WP_005248217.1	1		cds-WP_005242388.1	0.615076		cds-WP_005241862.1	0.610111		cds-WP_005238602.1	0.948605
cds-WP_005248218.1	1		cds-WP_005248218.1	1		cds-WP_005246650.1	0.853034		cds-WP_005248218.1	1		cds-WP_005242400.1	0.615076		cds-WP_005250600.1	0.609922		cds-WP_037183109.1	0.948604
cds-WP_005248221.1	1		cds-WP_005248221.1	1		cds-WP_025433293.1	0.85283		cds-WP_005248221.1	1		cds-WP_005242427.1	0.615076		cds-WP_005252176.1	0.609909		cds-WP_005251428.1	0.948545
cds-WP_005248237.1	1		cds-WP_005248237.1	1		cds-WP_005249071.1	0.852775		cds-WP_005248237.1	1		cds-WP_005242497.1	0.615076		cds-WP_005243989.1	0.609733		cds-WP_005240391.1	0.948541
cds-WP_005248246.1	1		cds-WP_005248246.1	1		cds-WP_005248947.1	0.852758		cds-WP_005248246.1	1		cds-WP_005242559.1	0.615076		cds-WP_005252328.1	0.609539		cds-WP_025431644.1	0.948458
cds-WP_005248255.1	1		cds-WP_005248255.1	1		cds-WP_005248116.1	0.852699		cds-WP_005248255.1	1		cds-WP_005242722.1	0.615076		cds-WP_005246311.1	0.609122		cds-WP_005244825.1	0.948372
cds-WP_005248272.1	1		cds-WP_005248272.1	1		cds-WP_005243110.1	0.852637		cds-WP_005248272.1	1		cds-WP_005242751.1	0.615076		cds-WP_005244525.1	0.609084		cds-WP_043943826.1	0.948285
cds-WP_005248274.1	1		cds-WP_005248274.1	1		cds-WP_025432368.1	0.852571		cds-WP_005248274.1	1		cds-WP_005242762.1	0.615076		cds-WP_005250071.1	0.608317		cds-WP_025432396.1	0.948271
cds-WP_005248281.1	1		cds-WP_005248281.1	1		cds-WP_005258596.1	0.852544		cds-WP_005248281.1	1		cds-WP_005242798.1	0.615076		cds-WP_005241784.1	0.608157		cds-WP_005251023.1	0.948193
cds-WP_005248301.1	1		cds-WP_005248301.1	1		cds-WP_025433192.1	0.852472		cds-WP_005248301.1	1		cds-WP_005242803.1	0.615076		cds-WP_005251441.1	0.608109		cds-WP_003418601.1	0.948192
cds-WP_005248316.1	1		cds-WP_005248316.1	1		cds-K2Z90_RS27905	0.852355		cds-WP_005248316.1	1		cds-WP_005242824.1	0.615076		cds-WP_005244877.1	0.608074		cds-WP_005244919.1	0.94813
cds-WP_005248320.1	1		cds-WP_005248320.1	1		cds-WP_005239747.1	0.852309		cds-WP_005248320.1	1		cds-WP_005242909.1	0.615076		cds-WP_005239878.1	0.607848		cds-WP_005243010.1	0.948046
cds-WP_005248326.1	1		cds-WP_005248326.1	1		cds-WP_025431914.1	0.852213		cds-WP_005248326.1	1		cds-WP_005242944.1	0.615076		cds-WP_025432823.1	0.607806		cds-WP_005249141.1	0.948001
cds-WP_005248329.1	1		cds-WP_005248329.1	1		cds-WP_005244861.1	0.85217		cds-WP_005248329.1	1		cds-WP_005242958.1	0.615076		cds-WP_005239177.1	0.607741		cds-WP_005250964.1	0.948
cds-WP_005248330.1	1		cds-WP_005248330.1	1		cds-WP_005250455.1	0.852114		cds-WP_005248330.1	1		cds-WP_005242961.1	0.615076		cds-WP_005248926.1	0.607599		cds-WP_005247584.1	0.947995
cds-WP_005248345.1	1		cds-WP_005248345.1	1		cds-WP_025433618.1	0.852099		cds-WP_005248345.1	1		cds-WP_005242966.1	0.615076		cds-WP_005240987.1	0.607315		cds-WP_005238847.1	0.947974
cds-WP_005248464.1	1		cds-WP_005248464.1	1		cds-WP_005244958.1	0.851934		cds-WP_005248464.1	1		cds-WP_005242974.1	0.615076		cds-WP_005251383.1	0.607264		cds-WP_005244345.1	0.94796
cds-WP_005248465.1	1		cds-WP_005248465.1	1		cds-WP_005252897.1	0.851861		cds-WP_005248465.1	1		cds-WP_005242982.1	0.615076		cds-WP_005238704.1	0.607036		cds-WP_025433592.1	0.947844
cds-WP_005248475.1	1		cds-WP_005248475.1	1		cds-WP_005244579.1	0.851807		cds-WP_005248475.1	1		cds-WP_005243002.1	0.615076		cds-WP_005239478.1	0.606982		cds-WP_005247736.1	0.947816
cds-WP_005248476.1	1		cds-WP_005248476.1	1		cds-WP_025432410.1	0.851806		cds-WP_005248476.1	1		cds-WP_005243009.1	0.615076		cds-WP_005241637.1	0.606648		cds-WP_005251803.1	0.94772
cds-WP_005248477.1	1		cds-WP_005248477.1	1		cds-WP_005242824.1	0.851718		cds-WP_005248477.1	1		cds-WP_005243011.1	0.615076		cds-WP_005242135.1	0.606393		cds-WP_005244883.1	0.947719
cds-WP_005248479.1	1		cds-WP_005248479.1	1		cds-WP_025432933.1	0.851664		cds-WP_005248479.1	1		cds-WP_005243022.1	0.615076		cds-WP_025432730.1	0.606358		cds-WP_025432986.1	0.94768
cds-WP_005248484.1	1		cds-WP_005248484.1	1		cds-WP_025431817.1	0.851573		cds-WP_005248484.1	1		cds-WP_005243030.1	0.615076		cds-WP_005247783.1	0.606288		cds-WP_005244691.1	0.947656
cds-WP_005248485.1	1		cds-WP_005248485.1	1		cds-WP_005247895.1	0.851487		cds-WP_005248485.1	1		cds-WP_005243035.1	0.615076		cds-WP_005239745.1	0.606235		cds-WP_025431961.1	0.947577
cds-WP_005248491.1	1		cds-WP_005248491.1	1		cds-WP_005240313.1	0.851461		cds-WP_005248491.1	1		cds-WP_005243036.1	0.615076		cds-WP_005244774.1	0.606121		cds-WP_005238596.1	0.947557
cds-WP_005248495.1	1		cds-WP_005248495.1	1		cds-WP_005241030.1	0.85142		cds-WP_005248495.1	1		cds-WP_005243052.1	0.615076		cds-WP_005247567.1	0.605937		cds-WP_005250930.1	0.947541
cds-WP_005248500.1	1		cds-WP_005248500.1	1		cds-WP_005251227.1	0.851155		cds-WP_005248500.1	1		cds-WP_005243054.1	0.615076		cds-WP_005249223.1	0.605815		cds-WP_005240761.1	0.947531
cds-WP_005248501.1	1		cds-WP_005248501.1	1		cds-WP_005244586.1	0.850863		cds-WP_005248501.1	1		cds-WP_005243056.1	0.615076		cds-WP_043943777.1	0.605712		cds-WP_005243885.1	0.94751
cds-WP_005248502.1	1		cds-WP_005248502.1	1		cds-WP_005244003.1	0.850661		cds-WP_005248502.1	1		cds-WP_005243071.1	0.615076		cds-WP_005250858.1	0.605663		cds-WP_025432206.1	0.94749
cds-WP_005248511.1	1		cds-WP_005248511.1	1		cds-WP_005243103.1	0.850625		cds-WP_005248511.1	1		cds-WP_005243085.1	0.615076		cds-WP_005250946.1	0.605622		cds-WP_005249625.1	0.947479
cds-WP_005248516.1	1		cds-WP_005248516.1	1		cds-WP_005251561.1	0.85057		cds-WP_005248516.1	1		cds-WP_005243086.1	0.615076		cds-WP_005252732.1	0.605526		cds-WP_005243110.1	0.947452
cds-WP_005248525.1	1		cds-WP_005248525.1	1		cds-WP_025432546.1	0.850513		cds-WP_005248525.1	1		cds-WP_005243104.1	0.615076		cds-WP_005252787.1	0.605484		cds-WP_005243811.1	0.947419
cds-WP_005248527.1	1		cds-WP_005248527.1	1		cds-WP_005251544.1	0.850344		cds-WP_005248527.1	1		cds-WP_005243119.1	0.615076		cds-WP_005252943.1	0.605394		cds-WP_005251979.1	0.947373
cds-WP_005248548.1	1		cds-WP_005248548.1	1		cds-WP_005238658.1	0.850344		cds-WP_005248548.1	1		cds-WP_005243124.1	0.615076		cds-WP_005238317.1	0.605369		cds-WP_005244831.1	0.94731
cds-WP_005248578.1	1		cds-WP_005248578.1	1		cds-WP_005248152.1	0.850174		cds-WP_005248578.1	1		cds-WP_005243146.1	0.615076		cds-WP_005252203.1	0.605067		cds-WP_005251402.1	0.947248
cds-WP_005248579.1	1		cds-WP_005248579.1	1		cds-WP_005245019.1	0.850084		cds-WP_005248579.1	1		cds-WP_005243149.1	0.615076		cds-WP_005238596.1	0.60484		cds-WP_025431983.1	0.947212
cds-WP_005248582.1	1		cds-WP_005248582.1	1		cds-WP_005248850.1	0.850081		cds-WP_005248582.1	1		cds-WP_005243155.1	0.615076		cds-WP_025432912.1	0.604507		cds-WP_005252061.1	0.947201
cds-WP_005248584.1	1		cds-WP_005248584.1	1		cds-WP_005243155.1	0.85		cds-WP_005248584.1	1		cds-WP_005243157.1	0.615076		cds-WP_025432916.1	0.604389		cds-WP_005239560.1	0.946951
cds-WP_005248588.1	1		cds-WP_005248588.1	1		cds-WP_005251463.1	0.849988		cds-WP_005248588.1	1		cds-WP_005243158.1	0.615076		cds-WP_005249211.1	0.604369		cds-WP_005238721.1	0.946929
cds-WP_005248600.1	1		cds-WP_005248600.1	1		cds-WP_005252061.1	0.849979		cds-WP_005248600.1	1		cds-WP_005243162.1	0.615076		cds-WP_037180020.1	0.604103		cds-WP_025432529.1	0.946844
cds-WP_005248601.1	1		cds-WP_005248601.1	1		cds-WP_005251008.1	0.849975		cds-WP_005248601.1	1		cds-WP_005243172.1	0.615076		cds-WP_025431903.1	0.603999		cds-WP_025432879.1	0.946799
cds-WP_005248606.1	1		cds-WP_005248606.1	1		cds-WP_005240786.1	0.849878		cds-WP_005248606.1	1		cds-WP_005243187.1	0.615076		cds-WP_005242398.1	0.60385		cds-WP_005248166.1	0.946783
cds-WP_005248607.1	1		cds-WP_005248607.1	1		cds-WP_005239736.1	0.849826		cds-WP_005248607.1	1		cds-WP_005243189.1	0.615076		cds-WP_005249959.1	0.603787		cds-WP_005248923.1	0.946713
cds-WP_005248610.1	1		cds-WP_005248610.1	1		cds-WP_005238133.1	0.849826		cds-WP_005248610.1	1		cds-WP_005243467.1	0.615076		cds-WP_025432180.1	0.603154		cds-WP_005244105.1	0.946708
cds-WP_005248613.1	1		cds-WP_005248613.1	1		cds-WP_005260402.1	0.849712		cds-WP_005248613.1	1		cds-WP_005243551.1	0.615076		cds-WP_005238004.1	0.603135		cds-WP_025433575.1	0.946564
cds-WP_005248615.1	1		cds-WP_005248615.1	1		cds-WP_005249605.1	0.849551		cds-WP_005248615.1	1		cds-WP_005243585.1	0.615076		cds-WP_005247484.1	0.603059		cds-WP_005257071.1	0.946522
cds-WP_005248617.1	1		cds-WP_005248617.1	1		cds-WP_025432260.1	0.849539		cds-WP_005248617.1	1		cds-WP_005243608.1	0.615076		cds-WP_005244831.1	0.6028		cds-WP_005251668.1	0.946504
cds-WP_005248622.1	1		cds-WP_005248622.1	1		cds-WP_025433014.1	0.849456		cds-WP_005248622.1	1		cds-WP_005243622.1	0.615076		cds-WP_005249197.1	0.60242		cds-WP_226955597.1	0.94649
cds-WP_005248623.1	1		cds-WP_005248623.1	1		cds-WP_005243933.1	0.849434		cds-WP_005248623.1	1		cds-WP_005243623.1	0.615076		cds-WP_005240606.1	0.602404		cds-WP_005252725.1	0.946474
cds-WP_005248626.1	1		cds-WP_005248626.1	1		cds-WP_226955728.1	0.849422		cds-WP_005248626.1	1		cds-WP_005243635.1	0.615076		cds-WP_005249158.1	0.602386		cds-WP_025432207.1	0.946414
cds-WP_005248628.1	1		cds-WP_005248628.1	1		cds-WP_005242145.1	0.849385		cds-WP_005248628.1	1		cds-WP_005243643.1	0.615076		cds-WP_005242753.1	0.60225		cds-WP_005246353.1	0.946411
cds-WP_005248630.1	1		cds-WP_005248630.1	1		cds-WP_005244614.1	0.849221		cds-WP_005248630.1	1		cds-WP_005243649.1	0.615076		cds-WP_226955596.1	0.602095		cds-WP_226955813.1	0.946386
cds-WP_005248631.1	1		cds-WP_005248631.1	1		cds-WP_005240726.1	0.849113		cds-WP_005248631.1	1		cds-WP_005243668.1	0.615076		cds-WP_005251604.1	0.601962		cds-WP_005240076.1	0.946383
cds-WP_005248635.1	1		cds-WP_005248635.1	1		cds-WP_005245035.1	0.84883		cds-WP_005248635.1	1		cds-WP_005243684.1	0.615076		cds-WP_005248951.1	0.601893		cds-WP_005239110.1	0.946276
cds-WP_005248636.1	1		cds-WP_005248636.1	1		cds-WP_005240777.1	0.848705		cds-WP_005248636.1	1		cds-WP_005243690.1	0.615076		cds-WP_025433492.1	0.601653		cds-WP_005251640.1	0.94627
cds-WP_005248640.1	1		cds-WP_005248640.1	1		cds-WP_005252920.1	0.848665		cds-WP_005248640.1	1		cds-WP_005243696.1	0.615076		cds-WP_005246074.1	0.60162		cds-WP_005240850.1	0.946222
cds-WP_005248641.1	1		cds-WP_005248641.1	1		cds-WP_025432521.1	0.848659		cds-WP_005248641.1	1		cds-WP_005243705.1	0.615076		cds-K2Z90_RS11630	0.601613		cds-WP_005239831.1	0.946123
cds-WP_005248663.1	1		cds-WP_005248663.1	1		cds-WP_005240097.1	0.848645		cds-WP_005248663.1	1		cds-WP_005243714.1	0.615076		cds-WP_005250797.1	0.601541		cds-WP_005243889.1	0.945941
cds-WP_005248709.1	1		cds-WP_005248709.1	1		cds-WP_005238620.1	0.848346		cds-WP_005248709.1	1		cds-WP_005243754.1	0.615076		cds-WP_005240315.1	0.601402		cds-WP_005252377.1	0.945882
cds-WP_005248710.1	1		cds-WP_005248710.1	1		cds-WP_005250839.1	0.848227		cds-WP_005248710.1	1		cds-WP_005243767.1	0.615076		cds-WP_025433599.1	0.601358		cds-WP_005248789.1	0.945857
cds-WP_005248711.1	1		cds-WP_005248711.1	1		cds-WP_025431670.1	0.848225		cds-WP_005248711.1	1		cds-WP_005243784.1	0.615076		cds-WP_005244970.1	0.601262		cds-K2Z90_RS12280	0.945814
cds-WP_005248717.1	1		cds-WP_005248717.1	1		cds-WP_025431775.1	0.848205		cds-WP_005248717.1	1		cds-WP_005243789.1	0.615076		cds-WP_005243881.1	0.601209		cds-WP_005251372.1	0.945789
cds-WP_005248719.1	1		cds-WP_005248719.1	1		cds-WP_005250970.1	0.848195		cds-WP_005248719.1	1		cds-WP_005243807.1	0.615076		cds-WP_025433623.1	0.600874		cds-WP_005247783.1	0.945781
cds-WP_005248726.1	1		cds-WP_005248726.1	1		cds-WP_025432206.1	0.848177		cds-WP_005248726.1	1		cds-WP_005243809.1	0.615076		cds-WP_005248625.1	0.600781		cds-WP_043943823.1	0.945671
cds-WP_005248736.1	1		cds-WP_005248736.1	1		cds-WP_025433300.1	0.848165		cds-WP_005248736.1	1		cds-WP_005243815.1	0.615076		cds-WP_005248780.1	0.600767		cds-WP_025433600.1	0.945642
cds-WP_005248745.1	1		cds-WP_005248745.1	1		cds-WP_005248641.1	0.848039		cds-WP_005248745.1	1		cds-WP_005243820.1	0.615076		cds-WP_025431638.1	0.600345		cds-WP_037182512.1	0.945638
cds-WP_005248746.1	1		cds-WP_005248746.1	1		cds-WP_005251105.1	0.848034		cds-WP_005248746.1	1		cds-WP_005243822.1	0.615076		cds-WP_005240542.1	0.600263		cds-WP_025433123.1	0.945627
cds-WP_005248750.1	1		cds-WP_005248750.1	1		cds-WP_005241656.1	0.847984		cds-WP_005248750.1	1		cds-WP_005243837.1	0.615076		cds-WP_025432298.1	0.600251		cds-WP_025433502.1	0.945593
cds-WP_005248751.1	1		cds-WP_005248751.1	1		cds-WP_005238720.1	0.847828		cds-WP_005248751.1	1		cds-WP_005243861.1	0.615076		cds-WP_005240749.1	0.599782		cds-WP_005239384.1	0.945508
cds-WP_005248760.1	1		cds-WP_005248760.1	1		cds-WP_005248578.1	0.847584		cds-WP_005248760.1	1		cds-WP_005243897.1	0.615076		cds-WP_011596917.1	0.599729		cds-WP_005252444.1	0.945481
cds-WP_005248766.1	1		cds-WP_005248766.1	1		cds-WP_025433175.1	0.847528		cds-WP_005248766.1	1		cds-WP_005243925.1	0.615076		cds-WP_226955523.1	0.599609		cds-WP_005249197.1	0.945475
cds-WP_005248772.1	1		cds-WP_005248772.1	1		cds-WP_005251366.1	0.847369		cds-WP_005248772.1	1		cds-WP_005243927.1	0.615076		cds-WP_005242158.1	0.599495		cds-WP_005248600.1	0.945397
cds-WP_005248776.1	1		cds-WP_005248776.1	1		cds-WP_005252176.1	0.847269		cds-WP_005248776.1	1		cds-WP_005243931.1	0.615076		cds-WP_005251105.1	0.599312		cds-WP_005239448.1	0.945376
cds-WP_005248777.1	1		cds-WP_005248777.1	1		cds-WP_025432813.1	0.847216		cds-WP_005248777.1	1		cds-WP_005243937.1	0.615076		cds-WP_005250869.1	0.599191		cds-WP_005240192.1	0.945294
cds-WP_005248783.1	1		cds-WP_005248783.1	1		cds-WP_005252033.1	0.846956		cds-WP_005248783.1	1		cds-WP_005243954.1	0.615076		cds-WP_005244080.1	0.598932		cds-WP_005241412.1	0.945271
cds-WP_005248784.1	1		cds-WP_005248784.1	1		cds-WP_005239693.1	0.846934		cds-WP_005248784.1	1		cds-WP_005243963.1	0.615076		cds-WP_005246192.1	0.598613		cds-WP_005240719.1	0.94527
cds-WP_005248786.1	1		cds-WP_005248786.1	1		cds-WP_005248588.1	0.846907		cds-WP_005248786.1	1		cds-WP_005243972.1	0.615076		cds-K2Z90_RS19080	0.598517		cds-WP_005250759.1	0.945221
cds-WP_005248797.1	1		cds-WP_005248797.1	1		cds-WP_025433271.1	0.846765		cds-WP_005248797.1	1		cds-WP_005243986.1	0.615076		cds-WP_005250011.1	0.598449		cds-WP_005238750.1	0.944973
cds-WP_005248804.1	1		cds-WP_005248804.1	1		cds-WP_005243991.1	0.846757		cds-WP_005248804.1	1		cds-WP_005243989.1	0.615076		cds-WP_025433129.1	0.598371		cds-WP_005248812.1	0.944973
cds-WP_005248805.1	1		cds-WP_005248805.1	1		cds-WP_005238588.1	0.846754		cds-WP_005248805.1	1		cds-WP_005243991.1	0.615076		cds-WP_005252757.1	0.598231		cds-WP_025432281.1	0.944966
cds-WP_005248807.1	1		cds-WP_005248807.1	1		cds-WP_025431867.1	0.846705		cds-WP_005248807.1	1		cds-WP_005243994.1	0.615076		cds-WP_005240282.1	0.598192		cds-WP_005238661.1	0.944946
cds-WP_005248809.1	1		cds-WP_005248809.1	1		cds-WP_005250764.1	0.846685		cds-WP_005248809.1	1		cds-WP_005244000.1	0.615076		cds-WP_025431896.1	0.597974		cds-WP_005252015.1	0.944869
cds-WP_005248810.1	1		cds-WP_005248810.1	1		cds-WP_025431780.1	0.846343		cds-WP_005248810.1	1		cds-WP_005244003.1	0.615076		cds-WP_025432461.1	0.597576		cds-WP_025431803.1	0.94485
cds-WP_005248812.1	1		cds-WP_005248812.1	1		cds-WP_005249200.1	0.846319		cds-WP_005248812.1	1		cds-WP_005244010.1	0.615076		cds-WP_005244305.1	0.597533		cds-WP_005244389.1	0.944732
cds-WP_005248814.1	1		cds-WP_005248814.1	1		cds-WP_005248272.1	0.846185		cds-WP_005248814.1	1		cds-WP_005244012.1	0.615076		cds-WP_005241633.1	0.597481		cds-WP_005244200.1	0.944716
cds-WP_005248815.1	1		cds-WP_005248815.1	1		cds-WP_005250050.1	0.846073		cds-WP_005248815.1	1		cds-WP_005244014.1	0.615076		cds-WP_037179746.1	0.597463		cds-WP_187300166.1	0.944711
cds-WP_005248816.1	1		cds-WP_005248816.1	1		cds-WP_005244415.1	0.846054		cds-WP_005248816.1	1		cds-WP_005244021.1	0.615076		cds-WP_005239501.1	0.597041		cds-WP_025433146.1	0.944699
cds-WP_005248818.1	1		cds-WP_005248818.1	1		cds-WP_005239818.1	0.846049		cds-WP_005248818.1	1		cds-WP_005244025.1	0.615076		cds-WP_005238592.1	0.59702		cds-WP_005244806.1	0.94469
cds-WP_005248821.1	1		cds-WP_005248821.1	1		cds-WP_005240904.1	0.846021		cds-WP_005248821.1	1		cds-WP_005244040.1	0.615076		cds-WP_005251269.1	0.596466		cds-WP_005244878.1	0.944651
cds-WP_005248827.1	1		cds-WP_005248827.1	1		cds-WP_025433179.1	0.845703		cds-WP_005248827.1	1		cds-WP_005244047.1	0.615076		cds-WP_005252452.1	0.596405		cds-WP_005240388.1	0.944596
cds-WP_005248829.1	1		cds-WP_005248829.1	1		cds-K2Z90_RS11630	0.845658		cds-WP_005248829.1	1		cds-WP_005244056.1	0.615076		cds-WP_025432544.1	0.596122		cds-WP_005238606.1	0.944497
cds-WP_005248830.1	1		cds-WP_005248830.1	1		cds-WP_007300914.1	0.845638		cds-WP_005248830.1	1		cds-WP_005244060.1	0.615076		cds-WP_005252063.1	0.595965		cds-WP_043943670.1	0.944455
cds-WP_005248831.1	1		cds-WP_005248831.1	1		cds-WP_005244945.1	0.845541		cds-WP_005248831.1	1		cds-WP_005244063.1	0.615076		cds-WP_025433195.1	0.595854		cds-WP_005244176.1	0.944452
cds-WP_005248832.1	1		cds-WP_005248832.1	1		cds-WP_005251236.1	0.845502		cds-WP_005248832.1	1		cds-WP_005244070.1	0.615076		cds-WP_025431701.1	0.595638		cds-WP_025431923.1	0.944344
cds-WP_005248838.1	1		cds-WP_005248838.1	1		cds-WP_025432202.1	0.845412		cds-WP_005248838.1	1		cds-WP_005244078.1	0.615076		cds-WP_025433302.1	0.595461		cds-WP_052379594.1	0.9442
cds-WP_005248840.1	1		cds-WP_005248840.1	1		cds-WP_025432818.1	0.845295		cds-WP_005248840.1	1		cds-WP_005244083.1	0.615076		cds-WP_005251571.1	0.595057		cds-WP_005250047.1	0.944192
cds-WP_005248844.1	1		cds-WP_005248844.1	1		cds-WP_005243939.1	0.845286		cds-WP_005248844.1	1		cds-WP_005244086.1	0.615076		cds-WP_005240312.1	0.594865		cds-WP_005252390.1	0.944172
cds-WP_005248847.1	1		cds-WP_005248847.1	1		cds-WP_005252410.1	0.845154		cds-WP_005248847.1	1		cds-WP_005244088.1	0.615076		cds-WP_025431679.1	0.594265		cds-WP_005243144.1	0.944158
cds-WP_005248850.1	1		cds-WP_005248850.1	1		cds-WP_005248525.1	0.845154		cds-WP_005248850.1	1		cds-WP_005244094.1	0.615076		cds-WP_005238169.1	0.593802		cds-WP_005245309.1	0.943929
cds-WP_005248861.1	1		cds-WP_005248861.1	1		cds-WP_005240620.1	0.844958		cds-WP_005248861.1	1		cds-WP_005244097.1	0.615076		cds-WP_005252427.1	0.593611		cds-WP_005237780.1	0.943871
cds-WP_005248868.1	1		cds-WP_005248868.1	1		cds-WP_005247382.1	0.844949		cds-WP_005248868.1	1		cds-WP_005244101.1	0.615076		cds-WP_005240205.1	0.593526		cds-WP_005241354.1	0.943864
cds-WP_005248869.1	1		cds-WP_005248869.1	1		cds-WP_005247772.1	0.844809		cds-WP_005248869.1	1		cds-WP_005244105.1	0.615076		cds-WP_005252860.1	0.593504		cds-WP_025432069.1	0.943852
cds-WP_005248872.1	1		cds-WP_005248872.1	1		cds-WP_025431816.1	0.844602		cds-WP_005248872.1	1		cds-WP_005244133.1	0.615076		cds-WP_005240442.1	0.593424		cds-WP_037182762.1	0.943811
cds-WP_005248889.1	1		cds-WP_005248889.1	1		cds-WP_005252956.1	0.844572		cds-WP_005248889.1	1		cds-WP_005244150.1	0.615076		cds-WP_005248615.1	0.593063		cds-WP_005242143.1	0.943777
cds-WP_005248892.1	1		cds-WP_005248892.1	1		cds-WP_005240679.1	0.844382		cds-WP_005248892.1	1		cds-WP_005244162.1	0.615076		cds-WP_005250495.1	0.593022		cds-WP_005246155.1	0.943757
cds-WP_005248897.1	1		cds-WP_005248897.1	1		cds-WP_005248077.1	0.844335		cds-WP_005248897.1	1		cds-WP_005244174.1	0.615076		cds-WP_025432152.1	0.593004		cds-WP_005252872.1	0.943732
cds-WP_005248899.1	1		cds-WP_005248899.1	1		cds-WP_005243124.1	0.844332		cds-WP_005248899.1	1		cds-WP_005244178.1	0.615076		cds-WP_005246519.1	0.592424		cds-WP_005243613.1	0.94371
cds-WP_005248900.1	1		cds-WP_005248900.1	1		cds-WP_025432900.1	0.844292		cds-WP_005248900.1	1		cds-WP_005244182.1	0.615076		cds-WP_005248622.1	0.592042		cds-WP_025432363.1	0.943604
cds-WP_005248911.1	1		cds-WP_005248911.1	1		cds-WP_005243729.1	0.844152		cds-WP_005248911.1	1		cds-WP_005244183.1	0.615076		cds-WP_005237888.1	0.591542		cds-WP_005248786.1	0.943596
cds-WP_005248914.1	1		cds-WP_005248914.1	1		cds-WP_005248168.1	0.844085		cds-WP_005248914.1	1		cds-WP_005244187.1	0.615076		cds-WP_005238097.1	0.591498		cds-WP_005248878.1	0.94341
cds-WP_005248917.1	1		cds-WP_005248917.1	1		cds-WP_005251648.1	0.843829		cds-WP_005248917.1	1		cds-WP_005244194.1	0.615076		cds-WP_025432525.1	0.591454		cds-WP_005246398.1	0.943399
cds-WP_005248920.1	1		cds-WP_005248920.1	1		cds-WP_037180746.1	0.843733		cds-WP_005248920.1	1		cds-WP_005244204.1	0.615076		cds-WP_009475022.1	0.591327		cds-WP_226955596.1	0.943383
cds-WP_005248923.1	1		cds-WP_005248923.1	1		cds-WP_005246351.1	0.843685		cds-WP_005248923.1	1		cds-WP_005244206.1	0.615076		cds-WP_005237782.1	0.591232		cds-WP_005240878.1	0.943188
cds-WP_005248924.1	1		cds-WP_005248924.1	1		cds-WP_005248640.1	0.843623		cds-WP_005248924.1	1		cds-WP_005244214.1	0.615076		cds-WP_226955669.1	0.591082		cds-WP_005247990.1	0.943083
cds-WP_005248925.1	1		cds-WP_005248925.1	1		cds-WP_005246352.1	0.843422		cds-WP_005248925.1	1		cds-WP_005244230.1	0.615076		cds-WP_025432412.1	0.59105		cds-WP_025433284.1	0.943045
cds-WP_005248928.1	1		cds-WP_005248928.1	1		cds-WP_005252441.1	0.843338		cds-WP_005248928.1	1		cds-WP_005244240.1	0.615076		cds-WP_037182765.1	0.591019		cds-WP_005251834.1	0.942952
cds-WP_005248935.1	1		cds-WP_005248935.1	1		cds-WP_005238363.1	0.843262		cds-WP_005248935.1	1		cds-WP_005244250.1	0.615076		cds-WP_005249785.1	0.590902		cds-WP_005240284.1	0.942897
cds-WP_005248937.1	1		cds-WP_005248937.1	1		cds-WP_005247177.1	0.843199		cds-WP_005248937.1	1		cds-WP_005244283.1	0.615076		cds-WP_005240049.1	0.590625		cds-WP_005251853.1	0.94289
cds-WP_005248938.1	1		cds-WP_005248938.1	1		cds-WP_005240632.1	0.843113		cds-WP_005248938.1	1		cds-WP_005244287.1	0.615076		cds-WP_005243643.1	0.590478		cds-WP_005244180.1	0.942863
cds-WP_005248947.1	1		cds-WP_005248947.1	1		cds-WP_025432296.1	0.84304		cds-WP_005248947.1	1		cds-WP_005244291.1	0.615076		cds-WP_005251387.1	0.590326		cds-WP_085990781.1	0.942821
cds-WP_005248949.1	1		cds-WP_005248949.1	1		cds-WP_005250387.1	0.84301		cds-WP_005248949.1	1		cds-WP_005244305.1	0.615076		cds-WP_005248760.1	0.589736		cds-WP_005244287.1	0.942781
cds-WP_005248951.1	1		cds-WP_005248951.1	1		cds-WP_025432513.1	0.842979		cds-WP_005248951.1	1		cds-WP_005244308.1	0.615076		cds-WP_226955709.1	0.589711		cds-WP_025433276.1	0.942687
cds-WP_005248960.1	1		cds-WP_005248960.1	1		cds-WP_005250389.1	0.842854		cds-WP_005248960.1	1		cds-WP_005244312.1	0.615076		cds-WP_005239056.1	0.589689		cds-WP_005238946.1	0.942574
cds-WP_005248970.1	1		cds-WP_005248970.1	1		cds-WP_005250477.1	0.842615		cds-WP_005248970.1	1		cds-WP_005244332.1	0.615076		cds-WP_005237780.1	0.589645		cds-WP_005247630.1	0.942544
cds-WP_005248972.1	1		cds-WP_005248972.1	1		cds-WP_005248330.1	0.842537		cds-WP_005248972.1	1		cds-WP_005244333.1	0.615076		cds-WP_005240761.1	0.589534		cds-WP_005237952.1	0.942469
cds-WP_005248975.1	1		cds-WP_005248975.1	1		cds-WP_005250991.1	0.842533		cds-WP_005248975.1	1		cds-WP_005244373.1	0.615076		cds-WP_005244095.1	0.589439		cds-WP_005238933.1	0.942467
cds-WP_005248982.1	1		cds-WP_005248982.1	1		cds-WP_025433278.1	0.842441		cds-WP_005248982.1	1		cds-WP_005244377.1	0.615076		cds-WP_005251155.1	0.589291		cds-WP_025433397.1	0.942448
cds-WP_005249040.1	1		cds-WP_005249040.1	1		cds-WP_005251715.1	0.842346		cds-WP_005249040.1	1		cds-WP_005244387.1	0.615076		cds-WP_005238772.1	0.589011		cds-WP_005240903.1	0.942446
cds-WP_005249052.1	1		cds-WP_005249052.1	1		cds-WP_005247736.1	0.842273		cds-WP_005249052.1	1		cds-WP_005244396.1	0.615076		cds-WP_005246246.1	0.588799		cds-WP_005251210.1	0.942423
cds-WP_005249065.1	1		cds-WP_005249065.1	1		cds-WP_005249133.1	0.842232		cds-WP_005249065.1	1		cds-WP_005244404.1	0.615076		cds-WP_005239642.1	0.588435		cds-WP_025432258.1	0.942361
cds-WP_005249071.1	1		cds-WP_005249071.1	1		cds-WP_005251408.1	0.841919		cds-WP_005249071.1	1		cds-WP_005244410.1	0.615076		cds-WP_005248983.1	0.588429		cds-WP_025432211.1	0.942307
cds-WP_005249076.1	1		cds-WP_005249076.1	1		cds-WP_005249165.1	0.841848		cds-WP_005249076.1	1		cds-WP_005244413.1	0.615076		cds-WP_005250392.1	0.587998		cds-WP_025432089.1	0.942264
cds-WP_005249079.1	1		cds-WP_005249079.1	1		cds-WP_025433237.1	0.841833		cds-WP_005249079.1	1		cds-WP_005244415.1	0.615076		cds-WP_167344014.1	0.587966		cds-WP_226955536.1	0.942254
cds-WP_005249087.1	1		cds-WP_005249087.1	1		cds-WP_226955772.1	0.841806		cds-WP_005249087.1	1		cds-WP_005244423.1	0.615076		cds-WP_005239633.1	0.587887		cds-WP_005239501.1	0.94224
cds-WP_005249088.1	1		cds-WP_005249088.1	1		cds-WP_025433381.1	0.841794		cds-WP_005249088.1	1		cds-WP_005244430.1	0.615076		cds-WP_226955540.1	0.587749		cds-WP_005243030.1	0.942235
cds-WP_005249093.1	1		cds-WP_005249093.1	1		cds-WP_025432105.1	0.841749		cds-WP_005249093.1	1		cds-WP_005244443.1	0.615076		cds-WP_005248199.1	0.587475		cds-WP_005239220.1	0.942202
cds-WP_005249094.1	1		cds-WP_005249094.1	1		cds-WP_226955510.1	0.841652		cds-WP_005249094.1	1		cds-WP_005244446.1	0.615076		cds-WP_005238766.1	0.58729		cds-WP_005238566.1	0.942104
cds-WP_005249106.1	1		cds-WP_005249106.1	1		cds-WP_005241784.1	0.841629		cds-WP_005249106.1	1		cds-WP_005244447.1	0.615076		cds-WP_005243692.1	0.5871		cds-WP_005248866.1	0.942101
cds-WP_005249107.1	1		cds-WP_005249107.1	1		cds-WP_005252737.1	0.841463		cds-WP_005249107.1	1		cds-WP_005244448.1	0.615076		cds-WP_005248746.1	0.586987		cds-WP_005240179.1	0.942095
cds-WP_005249110.1	1		cds-WP_005249110.1	1		cds-WP_025432864.1	0.841359		cds-WP_005249110.1	1		cds-WP_005244465.1	0.615076		cds-WP_005240626.1	0.586797		cds-WP_005256282.1	0.942078
cds-WP_005249132.1	1		cds-WP_005249132.1	1		cds-WP_005246520.1	0.841347		cds-WP_005249132.1	1		cds-WP_005244487.1	0.615076		cds-WP_005249735.1	0.586538		cds-WP_005261989.1	0.941957
cds-WP_005249133.1	1		cds-WP_005249133.1	1		cds-WP_025433246.1	0.841302		cds-WP_005249133.1	1		cds-WP_005244499.1	0.615076		cds-WP_025431598.1	0.586459		cds-WP_025433598.1	0.941879
cds-WP_005249134.1	1		cds-WP_005249134.1	1		cds-WP_005252860.1	0.841287		cds-WP_005249134.1	1		cds-WP_005244503.1	0.615076		cds-K2Z90_RS01535	0.586257		cds-WP_005251588.1	0.941771
cds-WP_005249135.1	1		cds-WP_005249135.1	1		cds-WP_005252845.1	0.841195		cds-WP_005249135.1	1		cds-WP_005244517.1	0.615076		cds-WP_005250764.1	0.585895		cds-WP_226955767.1	0.941718
cds-WP_005249137.1	1		cds-WP_005249137.1	1		cds-WP_005251303.1	0.841101		cds-WP_005249137.1	1		cds-WP_005244518.1	0.615076		cds-WP_005240901.1	0.58575		cds-WP_005238317.1	0.94168
cds-WP_005249140.1	1		cds-WP_005249140.1	1		cds-WP_005244094.1	0.841101		cds-WP_005249140.1	1		cds-WP_005244524.1	0.615076		cds-WP_005251588.1	0.585691		cds-WP_025432307.1	0.941679
cds-WP_005249141.1	1		cds-WP_005249141.1	1		cds-WP_005242958.1	0.840791		cds-WP_005249141.1	1		cds-WP_005244527.1	0.615076		cds-WP_005248177.1	0.585592		cds-WP_005240640.1	0.941582
cds-WP_005249153.1	1		cds-WP_005249153.1	1		cds-WP_025431766.1	0.840755		cds-WP_005249153.1	1		cds-WP_005244534.1	0.615076		cds-WP_025431822.1	0.585407		cds-WP_005252380.1	0.941559
cds-WP_005249154.1	1		cds-WP_005249154.1	1		cds-WP_005241800.1	0.84062		cds-WP_005249154.1	1		cds-WP_005244551.1	0.615076		cds-WP_226955533.1	0.585386		cds-WP_005239414.1	0.941491
cds-WP_005249165.1	1		cds-WP_005249165.1	1		cds-WP_226955722.1	0.840589		cds-WP_005249165.1	1		cds-WP_005244556.1	0.615076		cds-WP_005248166.1	0.585024		cds-WP_005238001.1	0.941459
cds-WP_005249166.1	1		cds-WP_005249166.1	1		cds-WP_025431644.1	0.840489		cds-WP_005249166.1	1		cds-WP_005244564.1	0.615076		cds-WP_005247765.1	0.584914		cds-WP_025432350.1	0.941384
cds-WP_005249167.1	1		cds-WP_005249167.1	1		cds-WP_037181441.1	0.840473		cds-WP_005249167.1	1		cds-WP_005244568.1	0.615076		cds-WP_005248191.1	0.584898		cds-WP_005249200.1	0.941368
cds-WP_005249180.1	1		cds-WP_005249180.1	1		cds-WP_005248832.1	0.840431		cds-WP_005249180.1	1		cds-WP_005244576.1	0.615076		cds-WP_005244608.1	0.584891		cds-WP_005248736.1	0.941346
cds-WP_005249187.1	1		cds-WP_005249187.1	1		cds-WP_009478066.1	0.840382		cds-WP_005249187.1	1		cds-WP_005244577.1	0.615076		cds-WP_037179827.1	0.584727		cds-WP_005251969.1	0.941321
cds-WP_005249194.1	1		cds-WP_005249194.1	1		cds-WP_005238731.1	0.840374		cds-WP_005249194.1	1		cds-WP_005244586.1	0.615076		cds-WP_025432101.1	0.584634		cds-WP_005252797.1	0.941317
cds-WP_005249197.1	1		cds-WP_005249197.1	1		cds-WP_005244735.1	0.840218		cds-WP_005249197.1	1		cds-WP_005244595.1	0.615076		cds-WP_005237962.1	0.584547		cds-WP_005250029.1	0.9413
cds-WP_005249200.1	1		cds-WP_005249200.1	1		cds-WP_005250946.1	0.840168		cds-WP_005249200.1	1		cds-WP_005244598.1	0.615076		cds-WP_005244131.1	0.584215		cds-WP_005252784.1	0.941286
cds-WP_005249205.1	1		cds-WP_005249205.1	1		cds-WP_005240828.1	0.8401		cds-WP_005249205.1	1		cds-WP_005244599.1	0.615076		cds-WP_005248341.1	0.583982		cds-WP_005252532.1	0.941256
cds-WP_005249207.1	1		cds-WP_005249207.1	1		cds-WP_025433186.1	0.840015		cds-WP_005249207.1	1		cds-WP_005244608.1	0.615076		cds-WP_226955655.1	0.583806		cds-WP_025432393.1	0.941217
cds-WP_005249208.1	1		cds-WP_005249208.1	1		cds-WP_005240402.1	0.839989		cds-WP_005249208.1	1		cds-WP_005244612.1	0.615076		cds-WP_025433192.1	0.583799		cds-WP_005249110.1	0.94119
cds-WP_005249211.1	1		cds-WP_005249211.1	1		cds-WP_025432978.1	0.839961		cds-WP_005249211.1	1		cds-WP_005244614.1	0.615076		cds-WP_005239894.1	0.583756		cds-WP_025431826.1	0.941068
cds-WP_005249213.1	1		cds-WP_005249213.1	1		cds-WP_005240903.1	0.839808		cds-WP_005249213.1	1		cds-WP_005244618.1	0.615076		cds-WP_005244438.1	0.583322		cds-WP_005237860.1	0.940965
cds-WP_005249214.1	1		cds-WP_005249214.1	1		cds-WP_005252942.1	0.839759		cds-WP_005249214.1	1		cds-WP_005244627.1	0.615076		cds-WP_025432595.1	0.582662		cds-WP_005248141.1	0.940956
cds-WP_005249217.1	1		cds-WP_005249217.1	1		cds-WP_005252524.1	0.839734		cds-WP_005249217.1	1		cds-WP_005244670.1	0.615076		cds-WP_005248937.1	0.582653		cds-WP_005243104.1	0.940933
cds-WP_005249229.1	1		cds-WP_005249229.1	1		cds-WP_005261263.1	0.839722		cds-WP_005249229.1	1		cds-WP_005244680.1	0.615076		cds-WP_005261372.1	0.582547		cds-WP_025433178.1	0.940881
cds-WP_005249239.1	1		cds-WP_005249239.1	1		cds-WP_025433304.1	0.839708		cds-WP_005249239.1	1		cds-WP_005244684.1	0.615076		cds-WP_005242156.1	0.582528		cds-WP_005248124.1	0.940796
cds-WP_005249241.1	1		cds-WP_005249241.1	1		cds-WP_005238689.1	0.839693		cds-WP_005249241.1	1		cds-WP_005244685.1	0.615076		cds-WP_005247823.1	0.582526		cds-WP_005251360.1	0.940705
cds-WP_005249245.1	1		cds-WP_005249245.1	1		cds-WP_005248663.1	0.839685		cds-WP_005249245.1	1		cds-WP_005244696.1	0.615076		cds-WP_005240589.1	0.582363		cds-WP_025431573.1	0.94065
cds-WP_005249254.1	1		cds-WP_005249254.1	1		cds-WP_005242355.1	0.839664		cds-WP_005249254.1	1		cds-WP_005244721.1	0.615076		cds-WP_005249271.1	0.581849		cds-WP_025433612.1	0.940641
cds-WP_005249255.1	1		cds-WP_005249255.1	1		cds-WP_043943823.1	0.839655		cds-WP_005249255.1	1		cds-WP_005244726.1	0.615076		cds-WP_005252784.1	0.581768		cds-WP_005244527.1	0.940639
cds-WP_005249256.1	1		cds-WP_005249256.1	1		cds-WP_005239966.1	0.839616		cds-WP_005249256.1	1		cds-WP_005244735.1	0.615076		cds-WP_005250001.1	0.581535		cds-WP_005252065.1	0.940517
cds-WP_005249268.1	1		cds-WP_005249268.1	1		cds-WP_005563039.1	0.839603		cds-WP_005249268.1	1		cds-WP_005244742.1	0.615076		cds-WP_005246208.1	0.581426		cds-WP_005247900.1	0.940516
cds-WP_005249271.1	1		cds-WP_005249271.1	1		cds-WP_005243769.1	0.8396		cds-WP_005249271.1	1		cds-WP_005244787.1	0.615076		cds-WP_005238949.1	0.581273		cds-WP_005248641.1	0.940443
cds-WP_005249286.1	1		cds-WP_005249286.1	1		cds-WP_005247951.1	0.839511		cds-WP_005249286.1	1		cds-WP_005244804.1	0.615076		cds-WP_025433232.1	0.581268		cds-WP_005254660.1	0.940092
cds-WP_005249301.1	1		cds-WP_005249301.1	1		cds-WP_005243009.1	0.839458		cds-WP_005249301.1	1		cds-WP_005244822.1	0.615076		cds-WP_005240249.1	0.581223		cds-WP_005247359.1	0.940078
cds-WP_005249317.1	1		cds-WP_005249317.1	1		cds-WP_037178950.1	0.839437		cds-WP_005249317.1	1		cds-WP_005244831.1	0.615076		cds-WP_005243995.1	0.581126		cds-WP_025433165.1	0.94005
cds-WP_005249320.1	1		cds-WP_005249320.1	1		cds-WP_025431923.1	0.839432		cds-WP_005249320.1	1		cds-WP_005244836.1	0.615076		cds-WP_005244503.1	0.581092		cds-WP_025431594.1	0.940006
cds-WP_005249321.1	1		cds-WP_005249321.1	1		cds-WP_005247591.1	0.839424		cds-WP_005249321.1	1		cds-WP_005244840.1	0.615076		cds-WP_043943640.1	0.58102		cds-WP_005241543.1	0.939999
cds-WP_005249325.1	1		cds-WP_005249325.1	1		cds-WP_005250777.1	0.839396		cds-WP_005249325.1	1		cds-WP_005244842.1	0.615076		cds-WP_005251065.1	0.581008		cds-WP_005252303.1	0.939982
cds-WP_005249329.1	1		cds-WP_005249329.1	1		cds-WP_025433121.1	0.839391		cds-WP_005249329.1	1		cds-WP_005244847.1	0.615076		cds-WP_025432310.1	0.580927		cds-WP_005248889.1	0.939969
cds-WP_005249483.1	1		cds-WP_005249483.1	1		cds-WP_226955721.1	0.839298		cds-WP_005249483.1	1		cds-WP_005244851.1	0.615076		cds-WP_005238363.1	0.580861		cds-WP_005244391.1	0.939964
cds-WP_005249605.1	1		cds-WP_005249605.1	1		cds-WP_005248786.1	0.839232		cds-WP_005249605.1	1		cds-WP_005244863.1	0.615076		cds-WP_005243595.1	0.580697		cds-WP_005246599.1	0.939945
cds-WP_005249618.1	1		cds-WP_005249618.1	1		cds-WP_025431918.1	0.839206		cds-WP_005249618.1	1		cds-WP_005244879.1	0.615076		cds-WP_005243625.1	0.580582		cds-WP_005248749.1	0.939876
cds-WP_005249620.1	1		cds-WP_005249620.1	1		cds-WP_005240740.1	0.838913		cds-WP_005249620.1	1		cds-WP_005244880.1	0.615076		cds-WP_085990786.1-3	0.580517		cds-WP_025433329.1	0.939874
cds-WP_005249629.1	1		cds-WP_005249629.1	1		cds-WP_005252293.1	0.838842		cds-WP_005249629.1	1		cds-WP_005244882.1	0.615076		cds-WP_005252902.1	0.580351		cds-WP_005250392.1	0.939836
cds-WP_005249635.1	1		cds-WP_005249635.1	1		cds-WP_005249271.1	0.83881		cds-WP_005249635.1	1		cds-WP_005244883.1	0.615076		cds-WP_005251893.1	0.580198		cds-WP_025432385.1	0.939752
cds-WP_005249651.1	1		cds-WP_005249651.1	1		cds-WP_085990779.1	0.838799		cds-WP_005249651.1	1		cds-WP_005244894.1	0.615076		cds-WP_025432600.1	0.580155		cds-WP_005248818.1	0.939727
cds-WP_005249674.1	1		cds-WP_005249674.1	1		cds-WP_025433284.1	0.838797		cds-WP_005249674.1	1		cds-WP_005244922.1	0.615076		cds-WP_005261100.1	0.580105		cds-WP_016882791.1	0.939666
cds-WP_005249677.1	1		cds-WP_005249677.1	1		cds-WP_005258138.1	0.838473		cds-WP_005249677.1	1		cds-WP_005244942.1	0.615076		cds-WP_005247396.1	0.579901		cds-WP_005240325.1	0.939555
cds-WP_005249686.1	1		cds-WP_005249686.1	1		cds-WP_037181550.1	0.838344		cds-WP_005249686.1	1		cds-WP_005244945.1	0.615076		cds-WP_143767482.1	0.579774		cds-WP_005247800.1	0.939449
cds-WP_005249725.1	1		cds-WP_005249725.1	1		cds-WP_009475022.1	0.838261		cds-WP_005249725.1	1		cds-WP_005244949.1	0.615076		cds-WP_025432556.1	0.579743		cds-WP_025433831.1	0.939266
cds-WP_005249734.1	1		cds-WP_005249734.1	1		cds-WP_025431983.1	0.838137		cds-WP_005249734.1	1		cds-WP_005244961.1	0.615076		cds-WP_005246501.1	0.579496		cds-WP_005249194.1	0.939219
cds-WP_005249767.1	1		cds-WP_005249767.1	1		cds-WP_037179094.1	0.838074		cds-WP_005249767.1	1		cds-WP_005244966.1	0.615076		cds-WP_005250076.1	0.579334		cds-WP_005238409.1	0.939091
cds-WP_005249785.1	1		cds-WP_005249785.1	1		cds-WP_005250038.1	0.837983		cds-WP_005249785.1	1		cds-WP_005244976.1	0.615076		cds-WP_005251298.1	0.579237		cds-WP_025431580.1	0.93909
cds-WP_005249836.1	1		cds-WP_005249836.1	1		cds-WP_005238834.1	0.837872		cds-WP_005249836.1	1		cds-WP_005244981.1	0.615076		cds-WP_025433090.1	0.579218		cds-WP_025432285.1	0.939044
cds-WP_005249837.1	1		cds-WP_005249837.1	1		cds-WP_005252385.1	0.837834		cds-WP_005249837.1	1		cds-WP_005244993.1	0.615076		cds-WP_005252879.1	0.579183		cds-WP_025433171.1	0.939043
cds-WP_005249840.1	1		cds-WP_005249840.1	1		cds-WP_005252264.1	0.837811		cds-WP_005249840.1	1		cds-WP_005245008.1	0.615076		cds-WP_009474702.1	0.579023		cds-WP_005239563.1	0.939036
cds-WP_005249842.1	1		cds-WP_005249842.1	1		cds-WP_005248057.1	0.837762		cds-WP_005249842.1	1		cds-WP_005245010.1	0.615076		cds-WP_005244047.1	0.578904		cds-WP_005250455.1	0.938998
cds-WP_005249848.1	1		cds-WP_005249848.1	1		cds-WP_187300260.1	0.837722		cds-WP_005249848.1	1		cds-WP_005245011.1	0.615076		cds-WP_005244523.1	0.578806		cds-WP_025432881.1	0.938971
cds-WP_005249850.1	1		cds-WP_005249850.1	1		cds-WP_005239497.1	0.837708		cds-WP_005249850.1	1		cds-WP_005245014.1	0.615076		cds-WP_005250059.1	0.578792		cds-WP_005240990.1	0.938894
cds-WP_005249853.1	1		cds-WP_005249853.1	1		cds-WP_005240218.1	0.837649		cds-WP_005249853.1	1		cds-WP_005245019.1	0.615076		cds-WP_005252565.1	0.578726		cds-WP_025432159.1	0.938872
cds-WP_005249868.1	1		cds-WP_005249868.1	1		cds-WP_005244503.1	0.837611		cds-WP_005249868.1	1		cds-WP_005245026.1	0.615076		cds-WP_005251596.1	0.578619		cds-WP_005238864.1	0.938823
cds-WP_005249959.1	1		cds-WP_005249959.1	1		cds-WP_005252825.1	0.837577		cds-WP_005249959.1	1		cds-WP_005245027.1	0.615076		cds-WP_005250763.1	0.578412		cds-WP_005240049.1	0.938775
cds-WP_005249967.1	1		cds-WP_005249967.1	1		cds-WP_043943825.1	0.83752		cds-WP_005249967.1	1		cds-WP_005245031.1	0.615076		cds-WP_005243583.1	0.578365		cds-WP_005260190.1	0.938605
cds-WP_005249972.1	1		cds-WP_005249972.1	1		cds-WP_025432153.1	0.837492		cds-WP_005249972.1	1		cds-WP_005245035.1	0.615076		cds-WP_005238689.1	0.578156		cds-WP_005258323.1	0.938547
cds-WP_005249980.1	1		cds-WP_005249980.1	1		cds-WP_025431970.1	0.837353		cds-WP_005249980.1	1		cds-WP_005245037.1	0.615076		cds-WP_005247552.1	0.578033		cds-WP_005249095.1	0.938522
cds-WP_005249981.1	1		cds-WP_005249981.1	1		cds-WP_025433268.1	0.837306		cds-WP_005249981.1	1		cds-WP_005245096.1	0.615076		cds-WP_005240793.1	0.578009		cds-WP_005247612.1	0.938463
cds-WP_005249997.1	1		cds-WP_005249997.1	1		cds-WP_005249848.1	0.837205		cds-WP_005249997.1	1		cds-WP_005245100.1	0.615076		cds-WP_005247709.1	0.577883		cds-WP_043943780.1	0.938256
cds-WP_005250001.1	1		cds-WP_005250001.1	1		cds-WP_005244894.1	0.837131		cds-WP_005250001.1	1		cds-WP_005245102.1	0.615076		cds-WP_005238900.1	0.577597		cds-WP_005240856.1	0.938233
cds-WP_005250003.1	1		cds-WP_005250003.1	1		cds-WP_005238579.1	0.837127		cds-WP_005250003.1	1		cds-WP_005245256.1	0.615076		cds-WP_005241802.1	0.577482		cds-WP_005244823.1	0.938201
cds-WP_005250007.1	1		cds-WP_005250007.1	1		cds-WP_005251310.1	0.83693		cds-WP_005250007.1	1		cds-WP_005245309.1	0.615076		cds-WP_005248212.1	0.57744		cds-WP_005238608.1	0.938179
cds-WP_005250010.1	1		cds-WP_005250010.1	1		cds-WP_005242130.1	0.836846		cds-WP_005250010.1	1		cds-WP_005246060.1	0.615076		cds-WP_005239338.1	0.576781		cds-WP_025432392.1	0.938127
cds-WP_005250017.1	1		cds-WP_005250017.1	1		cds-WP_005251771.1	0.836726		cds-WP_005250017.1	1		cds-WP_005246065.1	0.615076		cds-WP_037179308.1	0.576691		cds-WP_005247912.1	0.9381
cds-WP_005250019.1	1		cds-WP_005250019.1	1		cds-WP_005248208.1	0.836655		cds-WP_005250019.1	1		cds-WP_005246070.1	0.615076		cds-WP_005248928.1	0.576528		cds-WP_025431798.1	0.938099
cds-WP_005250027.1	1		cds-WP_005250027.1	1		cds-WP_005248631.1	0.836427		cds-WP_005250027.1	1		cds-WP_005246071.1	0.615076		cds-WP_005238456.1	0.576307		cds-WP_005240749.1	0.938052
cds-WP_005250030.1	1		cds-WP_005250030.1	1		cds-WP_005244214.1	0.836366		cds-WP_005250030.1	1		cds-WP_005246074.1	0.615076		cds-WP_005244187.1	0.576301		cds-WP_005244488.1	0.938023
cds-WP_005250032.1	1		cds-WP_005250032.1	1		cds-WP_025432372.1	0.836069		cds-WP_005250032.1	1		cds-WP_005246084.1	0.615076		cds-WP_005244133.1	0.576295		cds-WP_005249850.1	0.937883
cds-WP_005250036.1	1		cds-WP_005250036.1	1		cds-WP_005252390.1	0.836039		cds-WP_005250036.1	1		cds-WP_005246094.1	0.615076		cds-WP_226955605.1	0.576254		cds-WP_025432995.1	0.937833
cds-WP_005250038.1	1		cds-WP_005250038.1	1		cds-WP_025433249.1	0.835714		cds-WP_005250038.1	1		cds-WP_005246101.1	0.615076		cds-WP_005238780.1	0.576225		cds-WP_005251476.1	0.937801
cds-WP_005250042.1	1		cds-WP_005250042.1	1		cds-WP_025431571.1	0.835612		cds-WP_005250042.1	1		cds-WP_005246120.1	0.615076		cds-WP_005240583.1	0.576184		cds-WP_005246231.1	0.937789
cds-WP_005250050.1	1		cds-WP_005250050.1	1		cds-WP_005261284.1	0.835433		cds-WP_005250050.1	1		cds-WP_005246155.1	0.615076		cds-WP_005239295.1	0.576124		cds-WP_005249251.1	0.93778
cds-WP_005250058.1	1		cds-WP_005250058.1	1		cds-WP_005249094.1	0.835354		cds-WP_005250058.1	1		cds-WP_005246169.1	0.615076		cds-WP_005248259.1	0.57599		cds-WP_005247827.1	0.937767
cds-WP_005250068.1	1		cds-WP_005250068.1	1		cds-WP_005243086.1	0.835327		cds-WP_005250068.1	1		cds-WP_005246203.1	0.615076		cds-WP_005261284.1	0.575821		cds-WP_005241358.1	0.937757
cds-WP_005250071.1	1		cds-WP_005250071.1	1		cds-WP_005240606.1	0.83532		cds-WP_005250071.1	1		cds-WP_005246205.1	0.615076		cds-WP_005244926.1	0.575587		cds-WP_025432388.1	0.937689
cds-WP_005250073.1	1		cds-WP_005250073.1	1		cds-WP_005249214.1	0.835258		cds-WP_005250073.1	1		cds-WP_005246210.1	0.615076		cds-WP_043943784.1	0.575329		cds-WP_005240024.1	0.937582
cds-WP_005250075.1	1		cds-WP_005250075.1	1		cds-WP_005244099.1	0.835075		cds-WP_005250075.1	1		cds-WP_005246224.1	0.615076		cds-WP_005243923.1	0.57528		cds-WP_226955658.1	0.93754
cds-WP_005250076.1	1		cds-WP_005250076.1	1		cds-WP_025431558.1	0.834966		cds-WP_005250076.1	1		cds-WP_005246242.1	0.615076		cds-WP_005244351.1	0.575155		cds-WP_061044211.1	0.937494
cds-WP_005250092.1	1		cds-WP_005250092.1	1		cds-WP_005246276.1	0.834889		cds-WP_005250092.1	1		cds-WP_005246296.1	0.615076		cds-WP_005251683.1	0.574841		cds-WP_025432232.1	0.937448
cds-WP_005250094.1	1		cds-WP_005250094.1	1		cds-WP_005250964.1	0.834861		cds-WP_005250094.1	1		cds-WP_005246311.1	0.615076		cds-WP_025432606.1	0.574801		cds-WP_005243054.1	0.937387
cds-WP_005250107.1	1		cds-WP_005250107.1	1		cds-WP_025432156.1	0.834773		cds-WP_005250107.1	1		cds-WP_005246327.1	0.615076		cds-WP_025432307.1	0.574725		cds-WP_005250071.1	0.937376
cds-WP_005250127.1	1		cds-WP_005250127.1	1		cds-WP_005252240.1	0.834766		cds-WP_005250127.1	1		cds-WP_005246352.1	0.615076		cds-WP_037182001.1	0.574638		cds-WP_005248272.1	0.937356
cds-WP_005250130.1	1		cds-WP_005250130.1	1		cds-WP_005250094.1	0.834755		cds-WP_005250130.1	1		cds-WP_005246364.1	0.615076		cds-WP_005251473.1	0.574578		cds-WP_025433618.1	0.937312
cds-WP_005250147.1	1		cds-WP_005250147.1	1		cds-WP_005238933.1	0.834673		cds-WP_005250147.1	1		cds-WP_005246368.1	0.615076		cds-WP_025431945.1	0.574443		cds-WP_005244594.1	0.937303
cds-WP_005250148.1	1		cds-WP_005250148.1	1		cds-WP_005243925.1	0.834338		cds-WP_005250148.1	1		cds-WP_005246372.1	0.615076		cds-WP_005245521.1	0.574381		cds-WP_005246426.1	0.937241
cds-WP_005250288.1	1		cds-WP_005250288.1	1		cds-WP_005251526.1	0.834312		cds-WP_005250288.1	1		cds-WP_005246375.1	0.615076		cds-WP_005251223.1	0.57432		cds-WP_005240048.1	0.937239
cds-WP_005250367.1	1		cds-WP_005250367.1	1		cds-WP_025432891.1	0.834221		cds-WP_005250367.1	1		cds-WP_005246395.1	0.615076		cds-WP_025432034.1	0.573806		cds-WP_005239957.1	0.937232
cds-WP_005250370.1	1		cds-WP_005250370.1	1		cds-WP_005245036.1	0.834188		cds-WP_005250370.1	1		cds-WP_005246399.1	0.615076		cds-WP_005244135.1	0.573756		cds-WP_005244423.1	0.937188
cds-WP_005250374.1	1		cds-WP_005250374.1	1		cds-WP_005247989.1	0.834073		cds-WP_005250374.1	1		cds-WP_005246417.1	0.615076		cds-WP_025432713.1	0.573529		cds-WP_005241786.1	0.936977
cds-WP_005250378.1	1		cds-WP_005250378.1	1		cds-WP_025432671.1	0.833902		cds-WP_005250378.1	1		cds-WP_005246448.1	0.615076		cds-WP_005254209.1	0.573494		cds-WP_005239372.1	0.936736
cds-WP_005250387.1	1		cds-WP_005250387.1	1		cds-WP_005243958.1	0.833748		cds-WP_005250387.1	1		cds-WP_005246498.1	0.615076		cds-WP_005249997.1	0.572918		cds-WP_005244696.1	0.936641
cds-WP_005250389.1	1		cds-WP_005250389.1	1		cds-WP_005246592.1	0.833744		cds-WP_005250389.1	1		cds-WP_005246502.1	0.615076		cds-WP_025433381.1	0.572817		cds-WP_005241002.1	0.936591
cds-WP_005250392.1	1		cds-WP_005250392.1	1		cds-WP_005243158.1	0.83374		cds-WP_005250392.1	1		cds-WP_005246612.1	0.615076		cds-WP_005249797.1	0.572779		cds-WP_005250387.1	0.936495
cds-WP_005250413.1	1		cds-WP_005250413.1	1		cds-WP_025433633.1	0.833621		cds-WP_005250413.1	1		cds-WP_005246633.1	0.615076		cds-WP_226955611.1	0.572719		cds-WP_025432519.1	0.936386
cds-WP_005250455.1	1		cds-WP_005250455.1	1		cds-WP_025433174.1	0.833611		cds-WP_005250455.1	1		cds-WP_005246650.1	0.615076		cds-WP_005251463.1	0.57238		cds-WP_005239177.1	0.936343
cds-WP_005250477.1	1		cds-WP_005250477.1	1		cds-WP_005239236.1	0.833414		cds-WP_005250477.1	1		cds-WP_005247177.1	0.615076		cds-WP_005240077.1	0.57201		cds-WP_005244021.1	0.936309
cds-WP_005250480.1	1		cds-WP_005250480.1	1		cds-WP_025431715.1	0.833204		cds-WP_005250480.1	1		cds-WP_005247281.1	0.615076		cds-WP_005252601.1	0.571802		cds-WP_025433006.1	0.936292
cds-WP_005250502.1	1		cds-WP_005250502.1	1		cds-WP_005247625.1	0.833192		cds-WP_005250502.1	1		cds-WP_005247359.1	0.615076		cds-WP_005251654.1	0.571587		cds-WP_025432671.1	0.936209
cds-WP_005250533.1	1		cds-WP_005250533.1	1		cds-WP_005244864.1	0.833125		cds-WP_005250533.1	1		cds-WP_005247363.1	0.615076		cds-WP_264297277.1	0.571474		cds-WP_009480441.1	0.936173
cds-WP_005250537.1	1		cds-WP_005250537.1	1		cds-WP_005238569.1	0.83303		cds-WP_005250537.1	1		cds-WP_005247369.1	0.615076		cds-WP_005251181.1	0.571467		cds-WP_005248722.1	0.936128
cds-WP_005250550.1	1		cds-WP_005250550.1	1		cds-WP_005248615.1	0.832778		cds-WP_005250550.1	1		cds-WP_005247375.1	0.615076		cds-WP_005241034.1	0.571456		cds-WP_005239017.1	0.935997
cds-WP_005250559.1	1		cds-WP_005250559.1	1		cds-WP_005251825.1	0.832657		cds-WP_005250559.1	1		cds-WP_005247377.1	0.615076		cds-WP_025432978.1	0.571248		cds-WP_005247725.1	0.935987
cds-WP_005250571.1	1		cds-WP_005250571.1	1		cds-WP_005244206.1	0.83242		cds-WP_005250571.1	1		cds-WP_005247382.1	0.615076		cds-WP_005242907.1	0.571059		cds-WP_025433599.1	0.935984
cds-WP_005250574.1	1		cds-WP_005250574.1	1		cds-WP_005243810.1	0.832411		cds-WP_005250574.1	1		cds-WP_005247385.1	0.615076		cds-WP_043943847.1	0.570988		cds-WP_226955768.1	0.935883
cds-WP_005250600.1	1		cds-WP_005250600.1	1		cds-WP_005245011.1	0.832277		cds-WP_005250600.1	1		cds-WP_005247390.1	0.615076		cds-WP_257237409.1	0.570988		cds-WP_005248872.1	0.935853
cds-WP_005250616.1	1		cds-WP_005250616.1	1		cds-WP_005248475.1	0.832254		cds-WP_005250616.1	1		cds-WP_005247398.1	0.615076		cds-WP_005238274.1	0.570988		cds-WP_005241740.1	0.935831
cds-WP_005250621.1	1		cds-WP_005250621.1	1		cds-WP_005252955.1	0.832208		cds-WP_005250621.1	1		cds-WP_005247408.1	0.615076		cds-WP_005238842.1	0.570988		cds-WP_005248924.1	0.935821
cds-WP_005250759.1	1		cds-WP_005250759.1	1		cds-WP_005239692.1	0.832037		cds-WP_005250759.1	1		cds-WP_005247430.1	0.615076		cds-WP_005241639.1	0.570988		cds-WP_005243130.1	0.935804
cds-WP_005250760.1	1		cds-WP_005250760.1	1		cds-WP_005242149.1	0.831993		cds-WP_005250760.1	1		cds-WP_005247432.1	0.615076		cds-WP_005242668.1	0.570988		cds-WP_025433182.1	0.9358
cds-WP_005250764.1	1		cds-WP_005250764.1	1		cds-WP_005241837.1	0.831976		cds-WP_005250764.1	1		cds-WP_005247445.1	0.615076		cds-WP_005243606.1	0.570988		cds-WP_005243126.1	0.935762
cds-WP_005250766.1	1		cds-WP_005250766.1	1		cds-WP_005244443.1	0.831808		cds-WP_005250766.1	1		cds-WP_005247450.1	0.615076		cds-WP_005244658.1	0.570988		cds-WP_005239497.1	0.935721
cds-WP_005250773.1	1		cds-WP_005250773.1	1		cds-WP_005240589.1	0.831783		cds-WP_005250773.1	1		cds-WP_005247472.1	0.615076		cds-WP_005244855.1	0.570988		cds-WP_005247973.1	0.935393
cds-WP_005250777.1	1		cds-WP_005250777.1	1		cds-WP_005244889.1	0.831571		cds-WP_005250777.1	1		cds-WP_005247479.1	0.615076		cds-WP_005245627.1	0.570988		cds-WP_005251065.1	0.935377
cds-WP_005250797.1	1		cds-WP_005250797.1	1		cds-WP_005244951.1	0.831543		cds-WP_005250797.1	1		cds-WP_005247482.1	0.615076		cds-WP_005245775.1	0.570988		cds-WP_005237854.1	0.935372
cds-WP_005250798.1	1		cds-WP_005250798.1	1		cds-WP_005259920.1	0.831337		cds-WP_005250798.1	1		cds-WP_005247484.1	0.615076		cds-WP_005246523.1	0.570988		cds-WP_005239478.1	0.935368
cds-WP_005250799.1	1		cds-WP_005250799.1	1		cds-WP_005238780.1	0.831281		cds-WP_005250799.1	1		cds-WP_005247486.1	0.615076		cds-WP_005248468.1	0.570988		cds-WP_005249980.1	0.93535
cds-WP_005250807.1	1		cds-WP_005250807.1	1		cds-WP_005244594.1	0.831077		cds-WP_005250807.1	1		cds-WP_005247490.1	0.615076		cds-WP_005248551.1	0.570988		cds-WP_005243963.1	0.935346
cds-WP_005250809.1	1		cds-WP_005250809.1	1		cds-WP_005242751.1	0.83094		cds-WP_005250809.1	1		cds-WP_005247511.1	0.615076		cds-WP_005248563.1	0.570988		cds-WP_005244063.1	0.935344
cds-WP_005250812.1	1		cds-WP_005250812.1	1		cds-WP_005249734.1	0.83088		cds-WP_005250812.1	1		cds-WP_005247513.1	0.615076		cds-WP_005249736.1	0.570988		cds-WP_005244871.1	0.935293
cds-WP_005250817.1	1		cds-WP_005250817.1	1		cds-WP_025433019.1	0.830815		cds-WP_005250817.1	1		cds-WP_005247527.1	0.615076		cds-WP_005250110.1	0.570988		cds-WP_005251981.1	0.935269
cds-WP_005250836.1	1		cds-WP_005250836.1	1		cds-WP_005252783.1	0.830753		cds-WP_005250836.1	1		cds-WP_005247531.1	0.615076		cds-WP_005250499.1	0.570988		cds-WP_025431613.1	0.935264
cds-WP_005250839.1	1		cds-WP_005250839.1	1		cds-WP_005252476.1	0.830636		cds-WP_005250839.1	1		cds-WP_005247567.1	0.615076		cds-WP_005250624.1	0.570988		cds-WP_005248447.1	0.935239
cds-WP_005250840.1	1		cds-WP_005250840.1	1		cds-WP_005252725.1	0.830532		cds-WP_005250840.1	1		cds-WP_005247571.1	0.615076		cds-WP_005250865.1	0.570988		cds-WP_005248038.1	0.935122
cds-WP_005250843.1	1		cds-WP_005250843.1	1		cds-WP_025431961.1	0.830271		cds-WP_005250843.1	1		cds-WP_005247574.1	0.615076		cds-WP_005251057.1	0.570988		cds-WP_025432752.1	0.93506
cds-WP_005250844.1	1		cds-WP_005250844.1	1		cds-WP_005248745.1	0.830237		cds-WP_005250844.1	1		cds-WP_005247579.1	0.615076		cds-WP_005252159.1	0.570988		cds-WP_005240987.1	0.934988
cds-WP_005250847.1	1		cds-WP_005250847.1	1		cds-WP_005238960.1	0.830166		cds-WP_005250847.1	1		cds-WP_005247625.1	0.615076		cds-WP_005252688.1	0.570988		cds-WP_005244590.1	0.934848
cds-WP_005250848.1	1		cds-WP_005250848.1	1		cds-WP_025432162.1	0.829946		cds-WP_005250848.1	1		cds-WP_005247642.1	0.615076		cds-WP_025431979.1	0.570988		cds-WP_005238598.1	0.934843
cds-WP_005250861.1	1		cds-WP_005250861.1	1		cds-WP_005243468.1	0.829779		cds-WP_005250861.1	1		cds-WP_005247649.1	0.615076		cds-WP_025432049.1	0.570988		cds-WP_005250771.1	0.934808
cds-WP_005250868.1	1		cds-WP_005250868.1	1		cds-WP_025433619.1	0.829723		cds-WP_005250868.1	1		cds-WP_005247654.1	0.615076		cds-WP_025432491.1	0.570988		cds-WP_005245020.1	0.934683
cds-WP_005250910.1	1		cds-WP_005250910.1	1		cds-WP_005239957.1	0.829599		cds-WP_005250910.1	1		cds-WP_005247707.1	0.615076		cds-WP_025432620.1	0.570988		cds-WP_025432542.1	0.934596
cds-WP_005250911.1	1		cds-WP_005250911.1	1		cds-WP_037181844.1	0.829453		cds-WP_005250911.1	1		cds-WP_005247710.1	0.615076		cds-WP_025432636.1	0.570988		cds-WP_005238339.1	0.934573
cds-WP_005250920.1	1		cds-WP_005250920.1	1		cds-WP_025433090.1	0.829353		cds-WP_005250920.1	1		cds-WP_005247724.1	0.615076		cds-WP_025432760.1	0.570988		cds-WP_005252306.1	0.934493
cds-WP_005250930.1	1		cds-WP_005250930.1	1		cds-WP_005239683.1	0.829297		cds-WP_005250930.1	1		cds-WP_005247733.1	0.615076		cds-WP_025433067.1	0.570988		cds-WP_005252719.1	0.934481
cds-WP_005250938.1	1		cds-WP_005250938.1	1		cds-WP_005239634.1	0.828931		cds-WP_005250938.1	1		cds-WP_005247748.1	0.615076		cds-WP_025433387.1	0.570988		cds-WP_005251654.1	0.934429
cds-WP_005250946.1	1		cds-WP_005250946.1	1		cds-WP_005237856.1	0.828785		cds-WP_005250946.1	1		cds-WP_005247755.1	0.615076		cds-WP_025433780.1	0.570988		cds-WP_005249959.1	0.934418
cds-WP_005250948.1	1		cds-WP_005250948.1	1		cds-WP_005240591.1	0.828656		cds-WP_005250948.1	1		cds-WP_005247765.1	0.615076		cds-WP_025433787.1	0.570988		cds-WP_025432298.1	0.934366
cds-WP_005250964.1	1		cds-WP_005250964.1	1		cds-WP_005243807.1	0.828636		cds-WP_005250964.1	1		cds-WP_005247772.1	0.615076		cds-WP_037182429.1	0.570988		cds-WP_025432852.1	0.934247
cds-WP_005250966.1	1		cds-WP_005250966.1	1		cds-WP_187300153.1	0.828553		cds-WP_005250966.1	1		cds-WP_005247785.1	0.615076		cds-WP_264297271.1	0.570988		cds-WP_005238874.1	0.934242
cds-WP_005250970.1	1		cds-WP_005250970.1	1		cds-WP_005248784.1	0.828495		cds-WP_005250970.1	1		cds-WP_005247800.1	0.615076		cds-WP_005237833.1	0.570981		cds-WP_005239374.1	0.934233
cds-WP_005250971.1	1		cds-WP_005250971.1	1		cds-WP_025432907.1	0.828379		cds-WP_005250971.1	1		cds-WP_005247806.1	0.615076		cds-WP_037179080.1	0.57074		cds-WP_187300232.1	0.934089
cds-WP_005250972.1	1		cds-WP_005250972.1	1		cds-WP_226955767.1	0.828331		cds-WP_005250972.1	1		cds-WP_005247810.1	0.615076		cds-WP_005242130.1	0.570593		cds-WP_005243092.1	0.934077
cds-WP_005250984.1	1		cds-WP_005250984.1	1		cds-WP_005249076.1	0.828254		cds-WP_005250984.1	1		cds-WP_005247840.1	0.615076		cds-WP_226955532.1	0.570159		cds-WP_005247544.1	0.934034
cds-WP_005250985.1	1		cds-WP_005250985.1	1		cds-WP_005249972.1	0.8282		cds-WP_005250985.1	1		cds-WP_005247843.1	0.615076		cds-WP_025431682.1	0.570079		cds-WP_005243718.1	0.933998
cds-WP_005250987.1	1		cds-WP_005250987.1	1		cds-WP_005239376.1	0.828123		cds-WP_005250987.1	1		cds-WP_005247861.1	0.615076		cds-WP_025433268.1	0.569854		cds-WP_005248928.1	0.933989
cds-WP_005250988.1	1		cds-WP_005250988.1	1		cds-WP_005239234.1	0.828077		cds-WP_005250988.1	1		cds-WP_005247895.1	0.615076		cds-WP_005238269.1	0.569496		cds-WP_005251222.1	0.933954
cds-WP_005250990.1	1		cds-WP_005250990.1	1		cds-WP_005251125.1	0.828069		cds-WP_005250990.1	1		cds-WP_005247916.1	0.615076		cds-WP_037182523.1	0.569094		cds-WP_025433164.1	0.93394
cds-WP_005250991.1	1		cds-WP_005250991.1	1		cds-WP_005249137.1	0.82773		cds-WP_005250991.1	1		cds-WP_005247918.1	0.615076		cds-WP_025433065.1	0.569093		cds-WP_005238914.1	0.933782
cds-WP_005250992.1	1		cds-WP_005250992.1	1		cds-WP_005252578.1	0.8274		cds-WP_005250992.1	1		cds-WP_005247937.1	0.615076		cds-WP_005238002.1	0.569051		cds-WP_005243796.1	0.933772
cds-WP_005250998.1	1		cds-WP_005250998.1	1		cds-WP_005248938.1	0.827324		cds-WP_005250998.1	1		cds-WP_005247958.1	0.615076		cds-WP_005244101.1	0.568855		cds-WP_005252852.1	0.933733
cds-WP_005250999.1	1		cds-WP_005250999.1	1		cds-WP_005248750.1	0.827116		cds-WP_005250999.1	1		cds-WP_005247960.1	0.615076		cds-WP_025432064.1	0.568739		cds-WP_005251156.1	0.933732
cds-WP_005251006.1	1		cds-WP_005251006.1	1		cds-WP_005249674.1	0.826998		cds-WP_005251006.1	1		cds-WP_005247978.1	0.615076		cds-WP_005249205.1	0.568499		cds-WP_005240246.1	0.933668
cds-WP_005251008.1	1		cds-WP_005251008.1	1		cds-WP_005252054.1	0.826899		cds-WP_005251008.1	1		cds-WP_005248003.1	0.615076		cds-WP_025433212.1	0.568432		cds-WP_005252732.1	0.933578
cds-WP_005251009.1	1		cds-WP_005251009.1	1		cds-WP_025433329.1	0.826812		cds-WP_005251009.1	1		cds-WP_005248030.1	0.615076		cds-WP_005252102.1	0.568373		cds-WP_005249997.1	0.933532
cds-WP_005251011.1	1		cds-WP_005251011.1	1		cds-WP_005242052.1	0.826698		cds-WP_005251011.1	1		cds-WP_005248040.1	0.615076		cds-WP_005244325.1	0.568255		cds-WP_005238704.1	0.93348
cds-WP_005251023.1	1		cds-WP_005251023.1	1		cds-WP_005252959.1	0.826529		cds-WP_005251023.1	1		cds-WP_005248057.1	0.615076		cds-WP_025432903.1	0.567733		cds-WP_005244726.1	0.93328
cds-WP_005251028.1	1		cds-WP_005251028.1	1		cds-WP_005251834.1	0.826519		cds-WP_005251028.1	1		cds-WP_005248077.1	0.615076		cds-WP_025432416.1	0.567523		cds-WP_005241880.1	0.933269
cds-WP_005251046.1	1		cds-WP_005251046.1	1		cds-WP_025433576.1	0.826479		cds-WP_005251046.1	1		cds-WP_005248081.1	0.615076		cds-WP_025432677.1	0.567372		cds-WP_005250797.1	0.93322
cds-WP_005251047.1	1		cds-WP_005251047.1	1		cds-WP_025432409.1	0.826479		cds-WP_005251047.1	1		cds-WP_005248087.1	0.615076		cds-WP_005239952.1	0.567233		cds-WP_025433412.1	0.933193
cds-WP_005251056.1	1		cds-WP_005251056.1	1		cds-WP_085990803.1	0.826365		cds-WP_005251056.1	1		cds-WP_005248094.1	0.615076		cds-WP_005239891.1	0.567171		cds-WP_025431727.1	0.933132
cds-WP_005251059.1	1		cds-WP_005251059.1	1		cds-K2Z90_RS14230	0.826347		cds-WP_005251059.1	1		cds-WP_005248114.1	0.615076		cds-WP_005243661.1	0.56709		cds-WP_005240375.1	0.933118
cds-WP_005251065.1	1		cds-WP_005251065.1	1		cds-WP_005248495.1	0.826261		cds-WP_005251065.1	1		cds-WP_005248124.1	0.615076		cds-WP_005251073.1	0.56699		cds-WP_025432341.1	0.933106
cds-WP_005251070.1	1		cds-WP_005251070.1	1		cds-WP_025433252.1	0.826195		cds-WP_005251070.1	1		cds-WP_005248127.1	0.615076		cds-WP_005246094.1	0.566576		cds-WP_025432316.1	0.93306
cds-WP_005251080.1	1		cds-WP_005251080.1	1		cds-WP_005238294.1	0.826161		cds-WP_005251080.1	1		cds-WP_005248139.1	0.615076		cds-WP_005241837.1	0.566397		cds-WP_226955526.1	0.933052
cds-WP_005251081.1	1		cds-WP_005251081.1	1		cds-WP_005243590.1	0.826158		cds-WP_005251081.1	1		cds-WP_005248141.1	0.615076		cds-WP_005252368.1	0.565992		cds-WP_005238482.1	0.932924
cds-WP_005251099.1	1		cds-WP_005251099.1	1		cds-WP_005242826.1-2	0.826136		cds-WP_005251099.1	1		cds-WP_005248152.1	0.615076		cds-WP_005247978.1	0.565801		cds-WP_005251571.1	0.932907
cds-WP_005251101.1	1		cds-WP_005251101.1	1		cds-WP_226955813.1	0.825914		cds-WP_005251101.1	1		cds-WP_005248165.1	0.615076		cds-WP_005238958.1	0.565647		cds-WP_005240295.1	0.932743
cds-WP_005251105.1	1		cds-WP_005251105.1	1		cds-WP_025433052.1	0.82591		cds-WP_005251105.1	1		cds-WP_005248195.1	0.615076		cds-WP_025432121.1	0.56547		cds-WP_025432956.1	0.932598
cds-WP_005251125.1	1		cds-WP_005251125.1	1		cds-WP_005256282.1	0.825874		cds-WP_005251125.1	1		cds-WP_005248208.1	0.615076		cds-WP_005248639.1	0.565462		cds-WP_226955797.1	0.932551
cds-WP_005251128.1	1		cds-WP_005251128.1	1		cds-WP_005252593.1	0.82586		cds-WP_005251128.1	1		cds-WP_005248214.1	0.615076		cds-WP_005261263.1	0.565349		cds-WP_005237868.1	0.93255
cds-WP_005251153.1	1		cds-WP_005251153.1	1		cds-WP_005563339.1	0.825761		cds-WP_005251153.1	1		cds-WP_005248217.1	0.615076		cds-WP_005249071.1	0.565227		cds-WP_005248794.1	0.932534
cds-WP_005251155.1	1		cds-WP_005251155.1	1		cds-WP_025431945.1	0.825677		cds-WP_005251155.1	1		cds-WP_005248218.1	0.615076		cds-WP_005244522.1	0.565222		cds-WP_005241654.1	0.932518
cds-WP_005251156.1	1		cds-WP_005251156.1	1		cds-WP_025431803.1	0.825531		cds-WP_005251156.1	1		cds-WP_005248237.1	0.615076		cds-WP_037179341.1	0.565157		cds-WP_005251375.1	0.932396
cds-WP_005251161.1	1		cds-WP_005251161.1	1		cds-WP_005252194.1	0.825526		cds-WP_005251161.1	1		cds-WP_005248253.1	0.615076		cds-WP_005249985.1	0.564942		cds-WP_025431951.1	0.932385
cds-WP_005251181.1	1		cds-WP_005251181.1	1		cds-WP_005248827.1	0.825361		cds-WP_005251181.1	1		cds-WP_005248259.1	0.615076		cds-WP_025431939.1	0.564927		cds-WP_025432845.1	0.93228
cds-WP_005251189.1	1		cds-WP_005251189.1	1		cds-WP_005238590.1	0.825349		cds-WP_005251189.1	1		cds-WP_005248298.1	0.615076		cds-WP_005250481.1	0.564916		cds-WP_226955679.1	0.932216
cds-WP_005251196.1	1		cds-WP_005251196.1	1		cds-WP_025433082.1	0.825193		cds-WP_005251196.1	1		cds-WP_005248301.1	0.615076		cds-WP_025432574.1	0.564888		cds-WP_005249245.1	0.932179
cds-WP_005251199.1	1		cds-WP_005251199.1	1		cds-WP_005244870.1	0.825152		cds-WP_005251199.1	1		cds-WP_005248316.1	0.615076		cds-WP_005238824.1	0.564829		cds-WP_005246185.1	0.932168
cds-WP_005251205.1	1		cds-WP_005251205.1	1		cds-WP_005248917.1	0.825138		cds-WP_005251205.1	1		cds-WP_005248329.1	0.615076		cds-WP_005252410.1	0.56476		cds-WP_005240300.1	0.932137
cds-WP_005251207.1	1		cds-WP_005251207.1	1		cds-WP_005243719.1	0.825114		cds-WP_005251207.1	1		cds-WP_005248330.1	0.615076		cds-WP_025432504.1	0.56467		cds-WP_005244859.1	0.932111
cds-WP_005251210.1	1		cds-WP_005251210.1	1		cds-WP_005248516.1	0.825081		cds-WP_005251210.1	1		cds-WP_005248356.1	0.615076		cds-WP_005252447.1	0.564602		cds-WP_005239791.1	0.932038
cds-WP_005251223.1	1		cds-WP_005251223.1	1		cds-WP_005239745.1	0.825		cds-WP_005251223.1	1		cds-WP_005248370.1	0.615076		cds-WP_005243492.1	0.564586		cds-WP_005237940.1	0.931979
cds-WP_005251227.1	1		cds-WP_005251227.1	1		cds-WP_005248814.1	0.824989		cds-WP_005251227.1	1		cds-WP_005248448.1	0.615076		cds-WP_025432159.1	0.564581		cds-WP_005243605.1	0.93193
cds-WP_005251230.1	1		cds-WP_005251230.1	1		cds-WP_005238757.1	0.824964		cds-WP_005251230.1	1		cds-WP_005248462.1	0.615076		cds-WP_005249134.1	0.564413		cds-WP_005251856.1	0.931825
cds-WP_005251231.1	1		cds-WP_005251231.1	1		cds-WP_005241311.1	0.8249		cds-WP_005251231.1	1		cds-WP_005248463.1	0.615076		cds-WP_005240319.1	0.564398		cds-WP_005244236.1	0.931757
cds-WP_005251233.1	1		cds-WP_005251233.1	1		cds-WP_005251990.1	0.824712		cds-WP_005251233.1	1		cds-WP_005248470.1	0.615076		cds-WP_005240878.1	0.564339		cds-WP_025432591.1	0.931531
cds-WP_005251234.1	1		cds-WP_005251234.1	1		cds-WP_005251362.1	0.824668		cds-WP_005251234.1	1		cds-WP_005248477.1	0.615076		cds-WP_005247625.1	0.564319		cds-WP_005248345.1	0.931518
cds-WP_005251236.1	1		cds-WP_005251236.1	1		cds-WP_005242946.1	0.824615		cds-WP_005251236.1	1		cds-WP_005248480.1	0.615076		cds-WP_005252228.1	0.564307		cds-WP_005247753.1	0.931498
cds-WP_005251244.1	1		cds-WP_005251244.1	1		cds-WP_025432395.1	0.824505		cds-WP_005251244.1	1		cds-WP_005248483.1	0.615076		cds-WP_025431594.1	0.564138		cds-WP_025432111.1	0.93149
cds-WP_005251248.1	1		cds-WP_005251248.1	1		cds-WP_005262316.1	0.824409		cds-WP_005251248.1	1		cds-WP_005248484.1	0.615076		cds-WP_025431796.1	0.564048		cds-WP_005248061.1	0.931417
cds-WP_005251258.1	1		cds-WP_005251258.1	1		cds-WP_005251332.1	0.8243		cds-WP_005251258.1	1		cds-WP_005248491.1	0.615076		cds-WP_005244088.1	0.563989		cds-WP_005240164.1	0.931357
cds-WP_005251269.1	1		cds-WP_005251269.1	1		cds-WP_005239793.1	0.82427		cds-WP_005251269.1	1		cds-WP_005248494.1	0.615076		cds-WP_005246673.1	0.563814		cds-WP_037183117.1	0.931346
cds-WP_005251300.1	1		cds-WP_005251300.1	1		cds-WP_005244212.1	0.824258		cds-WP_005251300.1	1		cds-WP_005248499.1	0.615076		cds-WP_005247633.1	0.563649		cds-WP_005248686.1	0.931338
cds-WP_005251302.1	1		cds-WP_005251302.1	1		cds-WP_005252937.1	0.824223		cds-WP_005251302.1	1		cds-WP_005248500.1	0.615076		cds-WP_005243883.1	0.563648		cds-WP_025431741.1	0.931201
cds-WP_005251303.1	1		cds-WP_005251303.1	1		cds-WP_005238864.1	0.824216		cds-WP_005251303.1	1		cds-WP_005248501.1	0.615076		cds-K2Z90_RS02765	0.563599		cds-WP_025431634.1	0.931157
cds-WP_005251310.1	1		cds-WP_005251310.1	1		cds-WP_005250621.1	0.824213		cds-WP_005251310.1	1		cds-WP_005248513.1	0.615076		cds-WP_005241554.1	0.563467		cds-WP_005244096.1	0.931027
cds-WP_005251331.1	1		cds-WP_005251331.1	1		cds-WP_005243986.1	0.824159		cds-WP_005251331.1	1		cds-WP_005248517.1	0.615076		cds-WP_005243885.1	0.563462		cds-WP_005250024.1	0.930911
cds-WP_005251332.1	1		cds-WP_005251332.1	1		cds-WP_005239117.1	0.824066		cds-WP_005251332.1	1		cds-WP_005248528.1	0.615076		cds-WP_005240527.1	0.563199		cds-WP_005244721.1	0.930872
cds-WP_005251338.1	1		cds-WP_005251338.1	1		cds-WP_005252261.1	0.824043		cds-WP_005251338.1	1		cds-WP_005248548.1	0.615076		cds-WP_005240471.1	0.563077		cds-WP_005250773.1	0.930871
cds-WP_005251342.1	1		cds-WP_005251342.1	1		cds-WP_005243931.1	0.823971		cds-WP_005251342.1	1		cds-WP_005248579.1	0.615076		cds-WP_025431881.1	0.563035		cds-WP_005244198.1	0.930858
cds-WP_005251356.1	1		cds-WP_005251356.1	1		cds-WP_005252334.1	0.823887		cds-WP_005251356.1	1		cds-WP_005248580.1	0.615076		cds-WP_005240731.1	0.563015		cds-WP_005237948.1	0.930856
cds-WP_005251362.1	1		cds-WP_005251362.1	1		cds-WP_025432300.1	0.823842		cds-WP_005251362.1	1		cds-WP_005248583.1	0.615076		cds-WP_005246426.1	0.562764		cds-WP_005243492.1	0.930821
cds-WP_005251366.1	1		cds-WP_005251366.1	1		cds-WP_264297251.1	0.823816		cds-WP_005251366.1	1		cds-WP_005248601.1	0.615076		cds-WP_005240604.1	0.56269		cds-WP_005243765.1	0.930812
cds-WP_005251368.1	1		cds-WP_005251368.1	1		cds-WP_005244349.1	0.82366		cds-WP_005251368.1	1		cds-WP_005248606.1	0.615076		cds-WP_025433310.1	0.562597		cds-WP_005250614.1	0.930786
cds-WP_005251372.1	1		cds-WP_005251372.1	1		cds-WP_025431676.1	0.823563		cds-WP_005251372.1	1		cds-WP_005248607.1	0.615076		cds-WP_005247564.1	0.562594		cds-WP_226955771.1	0.930779
cds-WP_005251375.1	1		cds-WP_005251375.1	1		cds-WP_005250027.1	0.82356		cds-WP_005251375.1	1		cds-WP_005248611.1	0.615076		cds-WP_005237942.1	0.562494		cds-WP_005239001.1	0.930767
cds-WP_005251379.1	1		cds-WP_005251379.1	1		cds-WP_005251922.1	0.823465		cds-WP_005251379.1	1		cds-WP_005248617.1	0.615076		cds-WP_005240630.1	0.562439		cds-WP_005248601.1	0.930757
cds-WP_005251381.1	1		cds-WP_005251381.1	1		cds-WP_005240222.1	0.823429		cds-WP_005251381.1	1		cds-WP_005248622.1	0.615076		cds-WP_005249686.1	0.562413		cds-WP_005243692.1	0.930725
cds-WP_005251383.1	1		cds-WP_005251383.1	1		cds-WP_005242961.1	0.82324		cds-WP_005251383.1	1		cds-WP_005248626.1	0.615076		cds-WP_005243963.1	0.562215		cds-WP_005242767.1	0.930724
cds-WP_005251384.1	1		cds-WP_005251384.1	1		cds-WP_005240143.1	0.823097		cds-WP_005251384.1	1		cds-WP_005248630.1	0.615076		cds-WP_005247479.1	0.562026		cds-WP_005251239.1	0.930617
cds-WP_005251387.1	1		cds-WP_005251387.1	1		cds-WP_005239657.1	0.823086		cds-WP_005251387.1	1		cds-WP_005248635.1	0.615076		cds-WP_005240493.1	0.561831		cds-WP_025431984.1	0.930608
cds-WP_005251393.1	1		cds-WP_005251393.1	1		cds-WP_226955607.1	0.822924		cds-WP_005251393.1	1		cds-WP_005248641.1	0.615076		cds-WP_226955678.1	0.561507		cds-WP_005250473.1	0.930512
cds-WP_005251402.1	1		cds-WP_005251402.1	1		cds-WP_005243031.1	0.82281		cds-WP_005251402.1	1		cds-WP_005248648.1	0.615076		cds-WP_226955519.1	0.561451		cds-WP_005246379.1	0.930456
cds-WP_005251408.1	1		cds-WP_005251408.1	1		cds-WP_005249052.1	0.822771		cds-WP_005251408.1	1		cds-WP_005248649.1	0.615076		cds-WP_005243009.1	0.561228		cds-WP_005246333.1	0.930233
cds-WP_005251428.1	1		cds-WP_005251428.1	1		cds-WP_025432224.1	0.822671		cds-WP_005251428.1	1		cds-WP_005248701.1	0.615076		cds-WP_005251685.1	0.560768		cds-WP_025433070.1	0.930156
cds-WP_005251463.1	1		cds-WP_005251463.1	1		cds-WP_025433251.1	0.822555		cds-WP_005251463.1	1		cds-WP_005248712.1	0.615076		cds-WP_005238135.1	0.560544		cds-WP_005238828.1	0.93011
cds-WP_005251473.1	1		cds-WP_005251473.1	1		cds-WP_005238789.1	0.822261		cds-WP_005251473.1	1		cds-WP_005248741.1	0.615076		cds-WP_005251384.1	0.560451		cds-WP_005251962.1	0.930007
cds-WP_005251486.1	1		cds-WP_005251486.1	1		cds-WP_005244083.1	0.822101		cds-WP_005251486.1	1		cds-WP_005248745.1	0.615076		cds-WP_005238792.1	0.560268		cds-WP_025431799.1	0.929983
cds-WP_005251495.1	1		cds-WP_005251495.1	1		cds-WP_005243022.1	0.821913		cds-WP_005251495.1	1		cds-WP_005248770.1	0.615076		cds-WP_025431957.1	0.560165		cds-WP_005252075.1	0.929945
cds-WP_005251513.1	1		cds-WP_005251513.1	1		cds-WP_005240272.1	0.821899		cds-WP_005251513.1	1		cds-WP_005248776.1	0.615076		cds-WP_005249086.1	0.559589		cds-WP_005244485.1	0.929902
cds-WP_005251518.1	1		cds-WP_005251518.1	1		cds-WP_025431653.1	0.821831		cds-WP_005251518.1	1		cds-WP_005248777.1	0.615076		cds-WP_005238107.1	0.559337		cds-WP_025431749.1	0.929884
cds-WP_005251522.1	1		cds-WP_005251522.1	1		cds-WP_025432884.1	0.821821		cds-WP_005251522.1	1		cds-WP_005248784.1	0.615076		cds-WP_005244727.1	0.559306		cds-WP_005239607.1	0.929841
cds-WP_005251525.1	1		cds-WP_005251525.1	1		cds-WP_025432289.1	0.82182		cds-WP_005251525.1	1		cds-WP_005248789.1	0.615076		cds-WP_005240466.1	0.559204		cds-WP_005238875.1	0.929779
cds-WP_005251526.1	1		cds-WP_005251526.1	1		cds-WP_005239684.1	0.821781		cds-WP_005251526.1	1		cds-WP_005248795.1	0.615076		cds-WP_025433016.1	0.559018		cds-WP_005244749.1	0.929694
cds-WP_005251530.1	1		cds-WP_005251530.1	1		cds-WP_005248726.1	0.821781		cds-WP_005251530.1	1		cds-WP_005248800.1	0.615076		cds-WP_005250752.1	0.558994		cds-WP_005248477.1	0.929614
cds-WP_005251538.1	1		cds-WP_005251538.1	1		cds-WP_005238944.1	0.821761		cds-WP_005251538.1	1		cds-WP_005248804.1	0.615076		cds-WP_005240192.1	0.558932		cds-WP_005243933.1	0.929584
cds-WP_005251539.1	1		cds-WP_005251539.1	1		cds-WP_005248982.1	0.821726		cds-WP_005251539.1	1		cds-WP_005248805.1	0.615076		cds-WP_025433164.1	0.558843		cds-WP_025431578.1	0.929539
cds-WP_005251540.1	1		cds-WP_005251540.1	1		cds-WP_025433223.1	0.821712		cds-WP_005251540.1	1		cds-WP_005248810.1	0.615076		cds-WP_025432385.1	0.558753		cds-WP_005247508.1	0.92943
cds-WP_005251543.1	1		cds-WP_005251543.1	1		cds-WP_005243738.1	0.821418		cds-WP_005251543.1	1		cds-WP_005248819.1	0.615076		cds-WP_005251199.1	0.558584		cds-WP_025431822.1	0.92942
cds-WP_005251544.1	1		cds-WP_005251544.1	1		cds-WP_005247422.1	0.821315		cds-WP_005251544.1	1		cds-WP_005248821.1	0.615076		cds-WP_025431794.1	0.558352		cds-WP_005237844.1	0.929394
cds-WP_005251545.1	1		cds-WP_005251545.1	1		cds-WP_005248951.1	0.821217		cds-WP_005251545.1	1		cds-WP_005248822.1	0.615076		cds-WP_226955789.1	0.558323		cds-WP_005239544.1	0.929364
cds-WP_005251547.1	1		cds-WP_005251547.1	1		cds-WP_025431578.1	0.8212		cds-WP_005251547.1	1		cds-WP_005248826.1	0.615076		cds-WP_005570063.1	0.558191		cds-WP_025431673.1	0.929342
cds-WP_005251561.1	1		cds-WP_005251561.1	1		cds-WP_025432918.1	0.82109		cds-WP_005251561.1	1		cds-WP_005248827.1	0.615076		cds-WP_005252930.1	0.558175		cds-WP_005258713.1	0.929301
cds-WP_005251571.1	1		cds-WP_005251571.1	1		cds-WP_025432247.1	0.82095		cds-WP_005251571.1	1		cds-WP_005248831.1	0.615076		cds-WP_005248816.1	0.558149		cds-WP_005248905.1	0.929237
cds-WP_005251573.1	1		cds-WP_005251573.1	1		cds-WP_005244232.1	0.820889		cds-WP_005251573.1	1		cds-WP_005248838.1	0.615076		cds-WP_226955606.1	0.557858		cds-WP_005250449.1	0.92918
cds-WP_005251584.1	1		cds-WP_005251584.1	1		cds-WP_005248281.1	0.820832		cds-WP_005251584.1	1		cds-WP_005248847.1	0.615076		cds-WP_061700406.1	0.557737		cds-WP_025431740.1	0.929115
cds-WP_005251588.1	1		cds-WP_005251588.1	1		cds-WP_005239667.1	0.82075		cds-WP_005251588.1	1		cds-WP_005248850.1	0.615076		cds-WP_005244978.1	0.557651		cds-WP_005251389.1	0.929111
cds-WP_005251594.1	1		cds-WP_005251594.1	1		cds-WP_226955799.1	0.820707		cds-WP_005251594.1	1		cds-WP_005248860.1	0.615076		cds-WP_005241640.1	0.557573		cds-WP_005248847.1	0.929027
cds-WP_005251602.1	1		cds-WP_005251602.1	1		cds-WP_005243760.1	0.820622		cds-WP_005251602.1	1		cds-WP_005248861.1	0.615076		cds-WP_005238845.1	0.557505		cds-WP_005238650.1	0.929006
cds-WP_005251605.1	1		cds-WP_005251605.1	1		cds-WP_005244133.1	0.820589		cds-WP_005251605.1	1		cds-WP_005248866.1	0.615076		cds-WP_005248840.1	0.55723		cds-WP_005243643.1	0.928869
cds-WP_005251609.1	1		cds-WP_005251609.1	1		cds-WP_005238424.1	0.820589		cds-WP_005251609.1	1		cds-WP_005248867.1	0.615076		cds-WP_025432543.1	0.557051		cds-WP_005241343.1	0.928799
cds-WP_005251624.1	1		cds-WP_005251624.1	1		cds-WP_005251674.1	0.820576		cds-WP_005251624.1	1		cds-WP_005248868.1	0.615076		cds-WP_025432549.1	0.556822		cds-WP_005244962.1	0.928797
cds-WP_005251635.1	1		cds-WP_005251635.1	1		cds-WP_005244167.1	0.82041		cds-WP_005251635.1	1		cds-WP_005248869.1	0.615076		cds-WP_005249144.1	0.556809		cds-WP_005244982.1	0.928732
cds-WP_005251647.1	1		cds-WP_005251647.1	1		cds-WP_025433624.1	0.820361		cds-WP_005251647.1	1		cds-WP_005248872.1	0.615076		cds-WP_005248528.1	0.556776		cds-WP_005252476.1	0.928697
cds-WP_005251648.1	1		cds-WP_005251648.1	1		cds-WP_005239642.1	0.820226		cds-WP_005251648.1	1		cds-WP_005248878.1	0.615076		cds-WP_005238339.1	0.556707		cds-WP_005247696.1	0.928649
cds-WP_005251654.1	1		cds-WP_005251654.1	1		cds-WP_025432642.1	0.820193		cds-WP_005251654.1	1		cds-WP_005248892.1	0.615076		cds-WP_025432795.1	0.556594		cds-WP_025432304.1	0.928601
cds-WP_005251655.1	1		cds-WP_005251655.1	1		cds-WP_005251101.1	0.820156		cds-WP_005251655.1	1		cds-WP_005248899.1	0.615076		cds-WP_226955797.1	0.556525		cds-WP_005251547.1	0.928533
cds-WP_005251659.1	1		cds-WP_005251659.1	1		cds-WP_025432919.1	0.820123		cds-WP_005251659.1	1		cds-WP_005248903.1	0.615076		cds-K2Z90_RS14235	0.556487		cds-WP_005239692.1	0.928512
cds-WP_005251661.1	1		cds-WP_005251661.1	1		cds-WP_005248829.1	0.820083		cds-WP_005251661.1	1		cds-WP_005248911.1	0.615076		cds-K2Z90_RS23990	0.55647		cds-WP_005251379.1	0.928417
cds-WP_005251663.1	1		cds-WP_005251663.1	1		cds-WP_025432001.1	0.820058		cds-WP_005251663.1	1		cds-WP_005248914.1	0.615076		cds-WP_005252847.1	0.55647		cds-WP_005260882.1	0.928048
cds-WP_005251668.1	1		cds-WP_005251668.1	1		cds-WP_025433274.1	0.820056		cds-WP_005251668.1	1		cds-WP_005248920.1	0.615076		cds-WP_025432621.1	0.55647		cds-WP_005244957.1	0.928024
cds-WP_005251670.1	1		cds-WP_005251670.1	1		cds-WP_005240990.1	0.819831		cds-WP_005251670.1	1		cds-WP_005248923.1	0.615076		cds-WP_005246496.1	0.55627		cds-WP_005252296.1	0.927992
cds-WP_005251671.1	1		cds-WP_005251671.1	1		cds-WP_025432197.1	0.81983		cds-WP_005251671.1	1		cds-WP_005248935.1	0.615076		cds-WP_043943780.1	0.556218		cds-WP_005262890.1	0.927977
cds-WP_005251674.1	1		cds-WP_005251674.1	1		cds-WP_005251248.1	0.819701		cds-WP_005251674.1	1		cds-WP_005248938.1	0.615076		cds-WP_025432864.1	0.55615		cds-WP_005247382.1	0.927759
cds-WP_005251677.1	1		cds-WP_005251677.1	1		cds-WP_226955540.1	0.819664		cds-WP_005251677.1	1		cds-WP_005248940.1	0.615076		cds-WP_005242116.1	0.55583		cds-K2Z90_RS23990	0.927749
cds-WP_005251683.1	1		cds-WP_005251683.1	1		cds-WP_005238991.1	0.819587		cds-WP_005251683.1	1		cds-WP_005248944.1	0.615076		cds-WP_005244691.1	0.555632		cds-WP_005252847.1	0.927749
cds-WP_005251685.1	1		cds-WP_005251685.1	1		cds-WP_005246518.1	0.819545		cds-WP_005251685.1	1		cds-WP_005248947.1	0.615076		cds-WP_005249213.1	0.555613		cds-WP_025432621.1	0.927749
cds-WP_005251689.1	1		cds-WP_005251689.1	1		cds-WP_005240214.1	0.819517		cds-WP_005251689.1	1		cds-WP_005248951.1	0.615076		cds-WP_005248923.1	0.554961		cds-WP_043943777.1	0.927697
cds-WP_005251693.1	1		cds-WP_005251693.1	1		cds-WP_005238264.1	0.819375		cds-WP_005251693.1	1		cds-WP_005248953.1	0.615076		cds-WP_005252795.1	0.554847		cds-WP_005238935.1	0.927636
cds-WP_005251699.1	1		cds-WP_005251699.1	1		cds-WP_005248766.1	0.81913		cds-WP_005251699.1	1		cds-WP_005248972.1	0.615076		cds-WP_005248613.1	0.554781		cds-WP_005245008.1	0.927602
cds-WP_005251715.1	1		cds-WP_005251715.1	1		cds-WP_005239342.1	0.819104		cds-WP_005251715.1	1		cds-WP_005248975.1	0.615076		cds-WP_005248607.1	0.554579		cds-WP_005243839.1	0.927597
cds-WP_005251724.1	1		cds-WP_005251724.1	1		cds-WP_005237765.1	0.81908		cds-WP_005251724.1	1		cds-WP_005248976.1	0.615076		cds-WP_005238286.1	0.554492		cds-WP_005238685.1	0.927572
cds-WP_005251728.1	1		cds-WP_005251728.1	1		cds-WP_005252290.1	0.819011		cds-WP_005251728.1	1		cds-WP_005248982.1	0.615076		cds-WP_005243682.1	0.55428		cds-WP_005247978.1	0.927379
cds-WP_005251734.1	1		cds-WP_005251734.1	1		cds-WP_005248237.1	0.818894		cds-WP_005251734.1	1		cds-WP_005248984.1	0.615076		cds-WP_025431586.1	0.554269		cds-WP_005238467.1	0.927344
cds-WP_005251754.1	1		cds-WP_005251754.1	1		cds-WP_005261286.1	0.818844		cds-WP_005251754.1	1		cds-WP_005249044.1	0.615076		cds-WP_005251284.1	0.554269		cds-WP_005247958.1	0.927227
cds-WP_005251758.1	1		cds-WP_005251758.1	1		cds-WP_005240856.1	0.81868		cds-WP_005251758.1	1		cds-WP_005249052.1	0.615076		cds-WP_005237787.1	0.553971		cds-WP_005258138.1	0.927192
cds-WP_005251771.1	1		cds-WP_005251771.1	1		cds-WP_005245031.1	0.818644		cds-WP_005251771.1	1		cds-WP_005249067.1	0.615076		cds-WP_005248296.1	0.553965		cds-WP_005243861.1	0.927017
cds-WP_005251793.1	1		cds-WP_005251793.1	1		cds-WP_025432789.1	0.818568		cds-WP_005251793.1	1		cds-WP_005249072.1	0.615076		cds-WP_005240549.1	0.55347		cds-WP_005241813.1	0.926921
cds-WP_005251799.1	1		cds-WP_005251799.1	1		cds-WP_005241711.1	0.818501		cds-WP_005251799.1	1		cds-WP_005249076.1	0.615076		cds-WP_005244568.1	0.553366		cds-WP_037180773.1	0.926912
cds-WP_005251801.1	1		cds-WP_005251801.1	1		cds-WP_025432868.1	0.818487		cds-WP_005251801.1	1		cds-WP_005249079.1	0.615076		cds-WP_005237923.1	0.552994		cds-WP_025432513.1	0.926851
cds-WP_005251814.1	1		cds-WP_005251814.1	1		cds-WP_005239950.1	0.818293		cds-WP_005251814.1	1		cds-WP_005249088.1	0.615076		cds-WP_005242967.1	0.552775		cds-WP_005247935.1	0.926837
cds-WP_005251825.1	1		cds-WP_005251825.1	1		cds-WP_005575144.1	0.818263		cds-WP_005251825.1	1		cds-WP_005249093.1	0.615076		cds-WP_005251965.1	0.552712		cds-WP_005252949.1	0.926711
cds-WP_005251827.1	1		cds-WP_005251827.1	1		cds-WP_025432149.1	0.818221		cds-WP_005251827.1	1		cds-WP_005249095.1	0.615076		cds-WP_005237955.1	0.55269		cds-WP_005244981.1	0.926645
cds-WP_005251830.1	1		cds-WP_005251830.1	1		cds-WP_005242153.1	0.81822		cds-WP_005251830.1	1		cds-WP_005249103.1	0.615076		cds-WP_025433448.1	0.551733		cds-WP_005243719.1	0.926639
cds-WP_005251834.1	1		cds-WP_005251834.1	1		cds-WP_005243722.1	0.818139		cds-WP_005251834.1	1		cds-WP_005249106.1	0.615076		cds-WP_005251513.1	0.551713		cds-WP_005240205.1	0.926638
cds-WP_005251853.1	1		cds-WP_005251853.1	1		cds-WP_005240486.1	0.818109		cds-WP_005251853.1	1		cds-WP_005249112.1	0.615076		cds-WP_005240059.1	0.551638		cds-WP_025432597.1	0.92655
cds-WP_005251854.1	1		cds-WP_005251854.1	1		cds-WP_005241863.1	0.81808		cds-WP_005251854.1	1		cds-WP_005249117.1	0.615076		cds-WP_005253068.1	0.551613		cds-WP_025433634.1	0.926548
cds-WP_005251856.1	1		cds-WP_005251856.1	1		cds-WP_005244992.1	0.818044		cds-WP_005251856.1	1		cds-WP_005249120.1	0.615076		cds-WP_025433584.1	0.551542		cds-WP_005252438.1	0.926457
cds-WP_005251892.1	1		cds-WP_005251892.1	1		cds-WP_037181792.1	0.818008		cds-WP_005251892.1	1		cds-WP_005249124.1	0.615076		cds-WP_025431649.1	0.551407		cds-WP_005248316.1	0.926431
cds-WP_005251902.1	1		cds-WP_005251902.1	1		cds-WP_005244014.1	0.818004		cds-WP_005251902.1	1		cds-WP_005249135.1	0.615076		cds-WP_025431965.1	0.551378		cds-WP_005251680.1	0.926363
cds-WP_005251916.1	1		cds-WP_005251916.1	1		cds-WP_025433158.1	0.817931		cds-WP_005251916.1	1		cds-WP_005249165.1	0.615076		cds-WP_005237846.1	0.551295		cds-WP_005247896.1	0.92635
cds-WP_005251922.1	1		cds-WP_005251922.1	1		cds-WP_005247855.1	0.817721		cds-WP_005251922.1	1		cds-WP_005249187.1	0.615076		cds-WP_025432330.1	0.551054		cds-WP_005252152.1	0.926309
cds-WP_005251928.1	1		cds-WP_005251928.1	1		cds-WP_005258779.1	0.817445		cds-WP_005251928.1	1		cds-WP_005249196.1	0.615076		cds-WP_005252077.1	0.550714		cds-WP_005238944.1	0.926215
cds-WP_005251935.1	1		cds-WP_005251935.1	1		cds-WP_005240471.1	0.817413		cds-WP_005251935.1	1		cds-WP_005249198.1	0.615076		cds-WP_005240414.1	0.5507		cds-WP_005237859.1	0.926157
cds-WP_005251936.1	1		cds-WP_005251936.1	1		cds-WP_005248085.1	0.81735		cds-WP_005251936.1	1		cds-WP_005249205.1	0.615076		cds-WP_025432926.1	0.55065		cds-WP_025432912.1	0.926125
cds-WP_005251967.1	1		cds-WP_005251967.1	1		cds-WP_025433066.1	0.81722		cds-WP_005251967.1	1		cds-WP_005249211.1	0.615076		cds-WP_025433060.1	0.550368		cds-WP_005244052.1	0.926084
cds-WP_005251969.1	1		cds-WP_005251969.1	1		cds-WP_005252774.1	0.817166		cds-WP_005251969.1	1		cds-WP_005249217.1	0.615076		cds-WP_005246522.1	0.550265		cds-WP_005244433.1	0.925961
cds-WP_005251971.1	1		cds-WP_005251971.1	1		cds-WP_025432346.1	0.817134		cds-WP_005251971.1	1		cds-WP_005249245.1	0.615076		cds-WP_005238737.1	0.550141		cds-WP_226955708.1	0.925835
cds-WP_005251979.1	1		cds-WP_005251979.1	1		cds-WP_005239839.1	0.817002		cds-WP_005251979.1	1		cds-WP_005249246.1	0.615076		cds-WP_025431894.1	0.550087		cds-WP_005247637.1	0.925778
cds-WP_005251984.1	1		cds-WP_005251984.1	1		cds-WP_025432069.1	0.816907		cds-WP_005251984.1	1		cds-WP_005249255.1	0.615076		cds-WP_005252130.1	0.550009		cds-WP_005248168.1	0.925653
cds-WP_005251986.1	1		cds-WP_005251986.1	1		cds-WP_005250938.1	0.816697		cds-WP_005251986.1	1		cds-WP_005249259.1	0.615076		cds-WP_005237940.1	0.549727		cds-WP_005247427.1	0.9256
cds-WP_005251990.1	1		cds-WP_005251990.1	1		cds-WP_005243104.1	0.816586		cds-WP_005251990.1	1		cds-WP_005249277.1	0.615076		cds-WP_005251028.1	0.549566		cds-WP_005252717.1	0.925534
cds-WP_005251997.1	1		cds-WP_005251997.1	1		cds-WP_005252807.1	0.816574		cds-WP_005251997.1	1		cds-WP_005249282.1	0.615076		cds-WP_005237946.1	0.54953		cds-WP_005251841.1	0.925501
cds-WP_005252000.1	1		cds-WP_005252000.1	1		cds-WP_025431649.1	0.81655		cds-WP_005252000.1	1		cds-WP_005249295.1	0.615076		cds-WP_025433073.1	0.549428		cds-WP_025432296.1	0.925496
cds-WP_005252012.1	1		cds-WP_005252012.1	1		cds-WP_005248978.1	0.816497		cds-WP_005252012.1	1		cds-WP_005249300.1	0.615076		cds-WP_005248964.1	0.549145		cds-K2Z90_RS19290	0.925409
cds-WP_005252015.1	1		cds-WP_005252015.1	1		cds-WP_005248804.1	0.816434		cds-WP_005252015.1	1		cds-WP_005249310.1	0.615076		cds-WP_025433237.1	0.548976		cds-WP_005243835.1	0.925398
cds-WP_005252018.1	1		cds-WP_005252018.1	1		cds-WP_037182604.1	0.816407		cds-WP_005252018.1	1		cds-WP_005249320.1	0.615076		cds-WP_005246226.1	0.548782		cds-WP_005243602.1	0.925375
cds-WP_005252019.1	1		cds-WP_005252019.1	1		cds-WP_005247759.1	0.816297		cds-WP_005252019.1	1		cds-WP_005249468.1-2	0.615076		cds-WP_025433264.1	0.548648		cds-WP_005252078.1	0.925352
cds-WP_005252021.1	1		cds-WP_005252021.1	1		cds-WP_164709532.1	0.816261		cds-WP_005252021.1	1		cds-WP_005249605.1	0.615076		cds-WP_005248059.1	0.54836		cds-WP_005242116.1	0.925324
cds-WP_005252024.1	1		cds-WP_005252024.1	1		cds-WP_037179842.1	0.816168		cds-WP_005252024.1	1		cds-WP_005249620.1	0.615076		cds-WP_005244922.1	0.548293		cds-WP_025432826.1	0.925236
cds-WP_005252033.1	1		cds-WP_005252033.1	1		cds-WP_005247928.1	0.816107		cds-WP_005252033.1	1		cds-WP_005249629.1	0.615076		cds-WP_005259626.1	0.548275		cds-K2Z90_RS12370	0.92523
cds-WP_005252048.1	1		cds-WP_005252048.1	1		cds-WP_005252745.1	0.816076		cds-WP_005252048.1	1		cds-WP_005249658.1	0.615076		cds-WP_005251699.1	0.548178		cds-WP_005244214.1	0.925121
cds-WP_005252054.1	1		cds-WP_005252054.1	1		cds-WP_005240527.1	0.816035		cds-WP_005252054.1	1		cds-WP_005249695.1	0.615076		cds-WP_025432966.1	0.548037		cds-WP_005238524.1	0.925107
cds-WP_005252057.1	1		cds-WP_005252057.1	1		cds-WP_005247497.1	0.815975		cds-WP_005252057.1	1		cds-WP_005249725.1	0.615076		cds-WP_005244883.1	0.547996		cds-WP_025432600.1	0.924996
cds-WP_005252061.1	1		cds-WP_005252061.1	1		cds-WP_025431703.1	0.815843		cds-WP_005252061.1	1		cds-WP_005249734.1	0.615076		cds-WP_005250616.1	0.547982		cds-WP_005239121.1	0.924991
cds-WP_005252063.1	1		cds-WP_005252063.1	1		cds-WP_005244673.1	0.815706		cds-WP_005252063.1	1		cds-WP_005249785.1	0.615076		cds-WP_005238995.1	0.547884		cds-WP_005252404.1	0.924894
cds-WP_005252065.1	1		cds-WP_005252065.1	1		cds-WP_005248760.1	0.81556		cds-WP_005252065.1	1		cds-WP_005249789.1	0.615076		cds-WP_005239747.1	0.547852		cds-WP_025432348.1	0.924863
cds-WP_005252069.1	1		cds-WP_005252069.1	1		cds-WP_005249141.1	0.815527		cds-WP_005252069.1	1		cds-WP_005249842.1	0.615076		cds-WP_005250135.1	0.547788		cds-WP_025432149.1	0.924745
cds-WP_005252070.1	1		cds-WP_005252070.1	1		cds-WP_005248776.1	0.815215		cds-WP_005252070.1	1		cds-WP_005249850.1	0.615076		cds-WP_005243919.1	0.54771		cds-WP_025432560.1	0.924742
cds-WP_005252073.1	1		cds-WP_005252073.1	1		cds-WP_025431733.1	0.815139		cds-WP_005252073.1	1		cds-WP_005249856.1	0.615076		cds-WP_025433106.1	0.54706		cds-WP_005243756.1	0.924648
cds-WP_005252075.1	1		cds-WP_005252075.1	1		cds-WP_005249853.1	0.815125		cds-WP_005252075.1	1		cds-WP_005249858.1	0.615076		cds-WP_005239455.1	0.546397		cds-WP_005247752.1	0.92461
cds-WP_005252077.1	1		cds-WP_005252077.1	1		cds-K2Z90_RS28060	0.815093		cds-WP_005252077.1	1		cds-WP_005249959.1	0.615076		cds-WP_264297272.1	0.546349		cds-WP_005240964.1	0.924501
cds-WP_005252078.1	1		cds-WP_005252078.1	1		cds-WP_005252412.1	0.814943		cds-WP_005252078.1	1		cds-WP_005249967.1	0.615076		cds-WP_005252958.1	0.546213		cds-WP_025431968.1	0.924464
cds-WP_005252082.1	1		cds-WP_005252082.1	1		cds-WP_005248830.1	0.814598		cds-WP_005252082.1	1		cds-WP_005249977.1	0.615076		cds-WP_005251260.1	0.546107		cds-WP_025432971.1	0.924451
cds-WP_005252084.1	1		cds-WP_005252084.1	1		cds-WP_005252881.1	0.814469		cds-WP_005252084.1	1		cds-WP_005249979.1	0.615076		cds-WP_005247810.1	0.546047		cds-WP_005242136.1	0.924451
cds-WP_005252102.1	1		cds-WP_005252102.1	1		cds-WP_005242938.1	0.81445		cds-WP_005252102.1	1		cds-WP_005249986.1	0.615076		cds-WP_025432275.1	0.545561		cds-WP_187300190.1	0.924404
cds-WP_005252104.1	1		cds-WP_005252104.1	1		cds-WP_025431592.1	0.814443		cds-WP_005252104.1	1		cds-WP_005250000.1	0.615076		cds-WP_005239384.1	0.545398		cds-WP_005249246.1	0.924365
cds-WP_005252133.1	1		cds-WP_005252133.1	1		cds-WP_005257351.1	0.814361		cds-WP_005252133.1	1		cds-WP_005250003.1	0.615076		cds-WP_005253670.1	0.545329		cds-WP_005238133.1	0.924344
cds-WP_005252134.1	1		cds-WP_005252134.1	1		cds-WP_009480441.1	0.814318		cds-WP_005252134.1	1		cds-WP_005250007.1	0.615076		cds-WP_005250033.1	0.5453		cds-WP_025433243.1	0.924248
cds-WP_005252137.1	1		cds-WP_005252137.1	1		cds-WP_025433232.1	0.814308		cds-WP_005252137.1	1		cds-WP_005250010.1	0.615076		cds-WP_005241863.1	0.54524		cds-WP_005250042.1	0.924234
cds-WP_005252150.1	1		cds-WP_005252150.1	1		cds-WP_005244442.1	0.814302		cds-WP_005252150.1	1		cds-WP_005250017.1	0.615076		cds-WP_005238754.1	0.545042		cds-WP_025433126.1	0.924232
cds-WP_005252152.1	1		cds-WP_005252152.1	1		cds-WP_025432293.1	0.814298		cds-WP_005252152.1	1		cds-WP_005250019.1	0.615076		cds-WP_025432889.1	0.544972		cds-WP_005249300.1	0.92423
cds-WP_005252154.1	1		cds-WP_005252154.1	1		cds-WP_005240850.1	0.813916		cds-WP_005252154.1	1		cds-WP_005250030.1	0.615076		cds-WP_025432662.1	0.544841		cds-WP_005243533.1	0.924209
cds-WP_005252172.1	1		cds-WP_005252172.1	1		cds-WP_005244882.1	0.81375		cds-WP_005252172.1	1		cds-WP_005250032.1	0.615076		cds-WP_025432879.1	0.544772		cds-WP_005244202.1	0.924149
cds-WP_005252176.1	1		cds-WP_005252176.1	1		cds-WP_005249725.1	0.813741		cds-WP_005252176.1	1		cds-WP_005250036.1	0.615076		cds-WP_005249112.1	0.544752		cds-WP_005249282.1	0.924009
cds-WP_005252180.1	1		cds-WP_005252180.1	1		cds-WP_005246120.1	0.813507		cds-WP_005252180.1	1		cds-WP_005250038.1	0.615076		cds-WP_005240762.1	0.544733		cds-WP_005238807.1	0.923867
cds-WP_005252190.1	1		cds-WP_005252190.1	1		cds-WP_005239613.1	0.813416		cds-WP_005252190.1	1		cds-WP_005250047.1	0.615076		cds-WP_005247861.1	0.544499		cds-WP_005244298.1	0.923852
cds-WP_005252194.1	1		cds-WP_005252194.1	1		cds-WP_025432934.1	0.813404		cds-WP_005252194.1	1		cds-WP_005250072.1	0.615076		cds-WP_166680705.1	0.544057		cds-WP_005240286.1	0.923751
cds-WP_005252199.1	1		cds-WP_005252199.1	1		cds-WP_025433137.1	0.813361		cds-WP_005252199.1	1		cds-WP_005250076.1	0.615076		cds-WP_005244878.1	0.544032		cds-WP_025431689.1	0.923684
cds-WP_005252203.1	1		cds-WP_005252203.1	1		cds-WP_025432922.1	0.813303		cds-WP_005252203.1	1		cds-WP_005250086.1	0.615076		cds-WP_005258384.1	0.544005		cds-WP_005238987.1	0.923648
cds-WP_005252231.1	1		cds-WP_005252231.1	1		cds-WP_005249107.1	0.8133		cds-WP_005252231.1	1		cds-WP_005250093.1	0.615076		cds-WP_025431941.1	0.543876		cds-WP_005237944.1	0.92345
cds-WP_005252240.1	1		cds-WP_005252240.1	1		cds-WP_025433139.1	0.813225		cds-WP_005252240.1	1		cds-WP_005250094.1	0.615076		cds-WP_005244726.1	0.543576		cds-WP_005252443.1	0.92345
cds-WP_005252241.1	1		cds-WP_005252241.1	1		cds-WP_025432982.1	0.813211		cds-WP_005252241.1	1		cds-WP_005250097.1	0.615076		cds-WP_025432844.1	0.543561		cds-WP_025432245.1	0.923409
cds-WP_005252247.1	1		cds-WP_005252247.1	1		cds-WP_005240141.1	0.813144		cds-WP_005252247.1	1		cds-WP_005250127.1	0.615076		cds-WP_005244094.1	0.543495		cds-WP_025432236.1	0.92334
cds-WP_005252249.1	1		cds-WP_005252249.1	1		cds-WP_005246069.1	0.812968		cds-WP_005252249.1	1		cds-WP_005250152.1	0.615076		cds-WP_005240828.1	0.543301		cds-WP_005244836.1	0.923339
cds-WP_005252259.1	1		cds-WP_005252259.1	1		cds-WP_005238747.1	0.812891		cds-WP_005252259.1	1		cds-WP_005250290.1	0.615076		cds-WP_005244014.1	0.543297		cds-WP_005239429.1	0.923302
cds-WP_005252261.1	1		cds-WP_005252261.1	1		cds-WP_025433426.1	0.812851		cds-WP_005252261.1	1		cds-WP_005250367.1	0.615076		cds-WP_009479096.1	0.543151		cds-WP_005239423.1	0.923238
cds-WP_005252262.1	1		cds-WP_005252262.1	1		cds-WP_005244140.1	0.812847		cds-WP_005252262.1	1		cds-WP_005250385.1	0.615076		cds-WP_025432363.1	0.54313		cds-WP_005252580.1	0.923211
cds-WP_005252264.1	1		cds-WP_005252264.1	1		cds-WP_005248579.1	0.812688		cds-WP_005252264.1	1		cds-WP_005250389.1	0.615076		cds-WP_025431845.1	0.542941		cds-WP_005244533.1	0.923156
cds-WP_005252275.1	1		cds-WP_005252275.1	1		cds-WP_005241841.1	0.812605		cds-WP_005252275.1	1		cds-WP_005250408.1	0.615076		cds-WP_143767426.1	0.542864		cds-WP_005240737.1	0.923101
cds-WP_005252280.1	1		cds-WP_005252280.1	1		cds-WP_005251356.1	0.812558		cds-WP_005252280.1	1		cds-WP_005250413.1	0.615076		cds-WP_003402602.1	0.542776		cds-WP_005251303.1	0.922912
cds-WP_005252290.1	1		cds-WP_005252290.1	1		cds-WP_005244373.1	0.812412		cds-WP_005252290.1	1		cds-WP_005250447.1	0.615076		cds-WP_005237871.1	0.542675		cds-WP_005240725.1	0.922879
cds-WP_005252291.1	1		cds-WP_005252291.1	1		cds-WP_025433189.1	0.812374		cds-WP_005252291.1	1		cds-WP_005250455.1	0.615076		cds-WP_025432234.1	0.542589		cds-WP_005251515.1	0.922821
cds-WP_005252293.1	1		cds-WP_005252293.1	1		cds-WP_005246333.1	0.812339		cds-WP_005252293.1	1		cds-WP_005250487.1	0.615076		cds-WP_025431694.1	0.542495		cds-WP_037179001.1	0.922777
cds-WP_005252296.1	1		cds-WP_005252296.1	1		cds-WP_005244429.1	0.812294		cds-WP_005252296.1	1		cds-WP_005250504.1	0.615076		cds-WP_005243157.1	0.542376		cds-WP_005238753.1	0.922692
cds-WP_005252299.1	1		cds-WP_005252299.1	1		cds-WP_005264833.1	0.812272		cds-WP_005252299.1	1		cds-WP_005250541.1	0.615076		cds-WP_025432264.1	0.542278		cds-WP_226955485.1	0.922637
cds-WP_005252304.1	1		cds-WP_005252304.1	1		cds-WP_005239504.1	0.812074		cds-WP_005252304.1	1		cds-WP_005250545.1	0.615076		cds-WP_037182762.1	0.54221		cds-WP_025432979.1	0.922608
cds-WP_005252316.1	1		cds-WP_005252316.1	1		cds-WP_005244162.1	0.812048		cds-WP_005252316.1	1		cds-WP_005250549.1	0.615076		cds-WP_005249162.1	0.542121		cds-WP_025433413.1	0.9224
cds-WP_005252328.1	1		cds-WP_005252328.1	1		cds-WP_005247870.1	0.811909		cds-WP_005252328.1	1		cds-WP_005250553.1	0.615076		cds-WP_025433597.1	0.541998		cds-WP_005239949.1	0.922371
cds-WP_005252334.1	1		cds-WP_005252334.1	1		cds-WP_025431771.1	0.81186		cds-WP_005252334.1	1		cds-WP_005250559.1	0.615076		cds-WP_005244453.1	0.541687		cds-WP_005244682.1	0.922357
cds-WP_005252335.1	1		cds-WP_005252335.1	1		cds-WP_005259666.1	0.81137		cds-WP_005252335.1	1		cds-WP_005250621.1	0.615076		cds-WP_005244721.1	0.541598		cds-WP_005241862.1	0.922204
cds-WP_005252339.1	1		cds-WP_005252339.1	1		cds-WP_005239354.1	0.811336		cds-WP_005252339.1	1		cds-WP_005250755.1	0.615076		cds-WP_005240746.1	0.541506		cds-WP_005251408.1	0.922109
cds-WP_005252344.1	1		cds-WP_005252344.1	1		cds-WP_005254663.1	0.811328		cds-WP_005252344.1	1		cds-WP_005250760.1	0.615076		cds-WP_037181317.1	0.541316		cds-WP_005252067.1	0.922101
cds-WP_005252355.1	1		cds-WP_005252355.1	1		cds-WP_005247710.1	0.811193		cds-WP_005252355.1	1		cds-WP_005250766.1	0.615076		cds-WP_005251375.1	0.541261		cds-WP_005238720.1	0.922027
cds-WP_005252368.1	1		cds-WP_005252368.1	1		cds-WP_005251538.1	0.810896		cds-WP_005252368.1	1		cds-WP_005250773.1	0.615076		cds-WP_005239585.1	0.541259		cds-WP_025431914.1	0.921899
cds-WP_005252374.1	1		cds-WP_005252374.1	1		cds-WP_025432545.1	0.810849		cds-WP_005252374.1	1		cds-WP_005250775.1	0.615076		cds-WP_005247566.1	0.541164		cds-WP_005238713.1	0.92189
cds-WP_005252376.1	1		cds-WP_005252376.1	1		cds-WP_025433230.1	0.810783		cds-WP_005252376.1	1		cds-WP_005250777.1	0.615076		cds-WP_005237785.1	0.540953		cds-WP_025432150.1	0.921771
cds-WP_005252377.1	1		cds-WP_005252377.1	1		cds-WP_005246395.1	0.810611		cds-WP_005252377.1	1		cds-WP_005250779.1	0.615076		cds-WP_005252163.1	0.540498		cds-WP_005241839.1	0.921755
cds-WP_005252378.1	1		cds-WP_005252378.1	1		cds-WP_005247584.1	0.810349		cds-WP_005252378.1	1		cds-WP_005250787.1	0.615076		cds-WP_005237903.1	0.540465		cds-WP_169692705.1	0.921582
cds-WP_005252380.1	1		cds-WP_005252380.1	1		cds-WP_011596606.1	0.810301		cds-WP_005252380.1	1		cds-WP_005250816.1	0.615076		cds-WP_005237905.1	0.540465		cds-WP_005244686.1	0.921451
cds-WP_005252385.1	1		cds-WP_005252385.1	1		cds-WP_025432850.1	0.810202		cds-WP_005252385.1	1		cds-WP_005250817.1	0.615076		cds-WP_005238825.1	0.540465		cds-WP_005243474.1	0.921407
cds-WP_005252387.1	1		cds-WP_005252387.1	1		cds-WP_005248861.1	0.810087		cds-WP_005252387.1	1		cds-WP_005250821.1	0.615076		cds-WP_005242454.1	0.540465		cds-WP_005249107.1	0.921321
cds-WP_005252390.1	1		cds-WP_005252390.1	1		cds-WP_005239930.1	0.810081		cds-WP_005252390.1	1		cds-WP_005250824.1	0.615076		cds-WP_005243042.1	0.540465		cds-WP_005251181.1	0.921298
cds-WP_005252394.1	1		cds-WP_005252394.1	1		cds-WP_005238002.1	0.810074		cds-WP_005252394.1	1		cds-WP_005250840.1	0.615076		cds-WP_005245266.1	0.540465		cds-WP_005251892.1	0.921285
cds-WP_005252398.1	1		cds-WP_005252398.1	1		cds-WP_005238055.1	0.809908		cds-WP_005252398.1	1		cds-WP_005250846.1	0.615076		cds-WP_005246088.1	0.540465		cds-WP_005237942.1	0.921276
cds-WP_005252400.1	1		cds-WP_005252400.1	1		cds-WP_005252532.1	0.809888		cds-WP_005252400.1	1		cds-WP_005250848.1	0.615076		cds-WP_005250034.1	0.540465		cds-WP_005240102.1	0.921178
cds-WP_005252403.1	1		cds-WP_005252403.1	1		cds-WP_005243130.1	0.809824		cds-WP_005252403.1	1		cds-WP_005250867.1	0.615076		cds-WP_005250886.1	0.540465		cds-WP_005250147.1	0.921161
cds-WP_005252404.1	1		cds-WP_005252404.1	1		cds-WP_264297287.1	0.809823		cds-WP_005252404.1	1		cds-WP_005250898.1	0.615076		cds-WP_025431959.1	0.540465		cds-WP_226955604.1	0.921129
cds-WP_005252410.1	1		cds-WP_005252410.1	1		cds-WP_005260374.1	0.809798		cds-WP_005252410.1	1		cds-WP_005250920.1	0.615076		cds-WP_037179951.1	0.540465		cds-WP_005239614.1	0.921108
cds-WP_005252412.1	1		cds-WP_005252412.1	1		cds-WP_005247681.1	0.809795		cds-WP_005252412.1	1		cds-WP_005250947.1	0.615076		cds-WP_043943845.1	0.540465		cds-WP_005251161.1	0.921101
cds-WP_005252414.1	1		cds-WP_005252414.1	1		cds-WP_005241608.1	0.809645		cds-WP_005252414.1	1		cds-WP_005250951.1	0.615076		cds-WP_050983332.1	0.540465		cds-WP_005248816.1	0.921055
cds-WP_005252423.1	1		cds-WP_005252423.1	1		cds-WP_005237844.1	0.809568		cds-WP_005252423.1	1		cds-WP_005250964.1	0.615076		cds-WP_226955806.1	0.540465		cds-WP_005244228.1	0.920975
cds-WP_005252427.1	1		cds-WP_005252427.1	1		cds-WP_025433264.1	0.809422		cds-WP_005252427.1	1		cds-WP_005250965.1	0.615076		cds-WP_005241555.1	0.540357		cds-WP_005252088.1	0.920816
cds-WP_005252432.1	1		cds-WP_005252432.1	1		cds-WP_005238493.1	0.80932		cds-WP_005252432.1	1		cds-WP_005250970.1	0.615076		cds-WP_005246070.1	0.5403		cds-WP_005241367.1	0.920754
cds-WP_005252438.1	1		cds-WP_005252438.1	1		cds-WP_025431934.1	0.809304		cds-WP_005252438.1	1		cds-WP_005250971.1	0.615076		cds-WP_005240264.1	0.540168		cds-WP_025432006.1	0.920674
cds-WP_005252441.1	1		cds-WP_005252441.1	1		cds-WP_025432328.1	0.809266		cds-WP_005252441.1	1		cds-WP_005250985.1	0.615076		cds-WP_005249113.1	0.540117		cds-WP_025433012.1	0.920651
cds-WP_005252443.1	1		cds-WP_005252443.1	1		cds-WP_005238903.1	0.809258		cds-WP_005252443.1	1		cds-WP_005250990.1	0.615076		cds-WP_005238605.1	0.539885		cds-WP_025431864.1	0.920594
cds-WP_005252447.1	1		cds-WP_005252447.1	1		cds-WP_005239412.1	0.809143		cds-WP_005252447.1	1		cds-WP_005250991.1	0.615076		cds-WP_025432519.1	0.539821		cds-WP_005249995.1	0.920512
cds-WP_005252452.1	1		cds-WP_005252452.1	1		cds-WP_005250076.1	0.809138		cds-WP_005252452.1	1		cds-WP_005250992.1	0.615076		cds-WP_025432918.1	0.539674		cds-WP_005244978.1	0.920505
cds-WP_005252456.1	1		cds-WP_005252456.1	1		cds-WP_005252335.1	0.809124		cds-WP_005252456.1	1		cds-WP_005251009.1	0.615076		cds-WP_005243052.1	0.539464		cds-WP_005238478.1	0.920502
cds-WP_005252457.1	1		cds-WP_005252457.1	1		cds-WP_005247517.1	0.809016		cds-WP_005252457.1	1		cds-WP_005251023.1	0.615076		cds-WP_005237960.1	0.538812		cds-WP_025432864.1	0.920502
cds-WP_005252461.1	1		cds-WP_005252461.1	1		cds-WP_005250032.1	0.80889		cds-WP_005252461.1	1		cds-WP_005251047.1	0.615076		cds-WP_005247958.1	0.538683		cds-WP_005247840.1	0.92043
cds-WP_005252469.1	1		cds-WP_005252469.1	1		cds-WP_005251161.1	0.808875		cds-WP_005252469.1	1		cds-WP_005251056.1	0.615076		cds-WP_005244551.1	0.538651		cds-WP_005248491.1	0.920307
cds-WP_005252471.1	1		cds-WP_005252471.1	1		cds-WP_025433222.1	0.808764		cds-WP_005252471.1	1		cds-WP_005251059.1	0.615076		cds-WP_005248057.1	0.538576		cds-WP_005238244.1	0.920295
cds-WP_005252476.1	1		cds-WP_005252476.1	1		cds-WP_005251081.1	0.80867		cds-WP_005252476.1	1		cds-WP_005251065.1	0.615076		cds-WP_005240640.1	0.538451		cds-WP_005238096.1	0.920287
cds-WP_005252510.1	1		cds-WP_005252510.1	1		cds-WP_005244433.1	0.808574		cds-WP_005252510.1	1		cds-WP_005251073.1	0.615076		cds-WP_025431558.1	0.538286		cds-WP_005238851.1	0.920271
cds-WP_005252514.1	1		cds-WP_005252514.1	1		cds-WP_005243050.1	0.808405		cds-WP_005252514.1	1		cds-WP_005251086.1	0.615076		cds-WP_226955841.1	0.538178		cds-WP_005244805.1	0.920221
cds-WP_005252524.1	1		cds-WP_005252524.1	1		cds-WP_025432887.1	0.80839		cds-WP_005252524.1	1		cds-WP_005251090.1	0.615076		cds-WP_005247177.1	0.538097		cds-WP_025433201.1	0.920217
cds-WP_005252530.1	1		cds-WP_005252530.1	1		cds-WP_005258295.1	0.808342		cds-WP_005252530.1	1		cds-WP_005251099.1	0.615076		cds-WP_005247770.1	0.537773		cds-WP_005246502.1	0.920091
cds-WP_005252532.1	1		cds-WP_005252532.1	1		cds-WP_005251584.1	0.808308		cds-WP_005252532.1	1		cds-WP_005251101.1	0.615076		cds-WP_005251724.1	0.537706		cds-WP_005244621.1	0.920069
cds-WP_005252536.1	1		cds-WP_005252536.1	1		cds-WP_005252883.1	0.808147		cds-WP_005252536.1	1		cds-WP_005251105.1	0.615076		cds-WP_005238791.1	0.537393		cds-WP_025432908.1	0.920042
cds-WP_005252542.1	1		cds-WP_005252542.1	1		cds-WP_005249268.1	0.808122		cds-WP_005252542.1	1		cds-WP_005251142.1	0.615076		cds-WP_025432161.1	0.53733		cds-WP_005244396.1	0.919972
cds-WP_005252569.1	1		cds-WP_005252569.1	1		cds-WP_025431924.1	0.807998		cds-WP_005252569.1	1		cds-WP_005251150.1	0.615076		cds-WP_005251125.1	0.537185		cds-WP_005252385.1	0.919913
cds-WP_005252571.1	1		cds-WP_005252571.1	1		cds-WP_005248527.1	0.807798		cds-WP_005252571.1	1		cds-WP_005251155.1	0.615076		cds-WP_005237808.1	0.537171		cds-WP_005249286.1	0.919807
cds-WP_005252578.1	1		cds-WP_005252578.1	1		cds-WP_005252344.1	0.80774		cds-WP_005252578.1	1		cds-WP_005251156.1	0.615076		cds-WP_025432355.1	0.537163		cds-WP_005250093.1	0.91973
cds-WP_005252593.1	1		cds-WP_005252593.1	1		cds-K2Z90_RS19080	0.807678		cds-WP_005252593.1	1		cds-WP_005251229.1	0.615076		cds-WP_005247527.1	0.537057		cds-WP_005251530.1	0.919658
cds-WP_005252671.1	1		cds-WP_005252671.1	1		cds-WP_005250817.1	0.807638		cds-WP_005252671.1	1		cds-WP_005251230.1	0.615076		cds-WP_005251368.1	0.537055		cds-WP_005251532.1	0.919581
cds-WP_005252672.1	1		cds-WP_005252672.1	1		cds-WP_005242413.1	0.807393		cds-WP_005252672.1	1		cds-WP_005251232.1	0.615076		cds-WP_005247779.1	0.537002		cds-WP_226955751.1	0.919575
cds-WP_005252675.1	1		cds-WP_005252675.1	1		cds-WP_005251199.1	0.807103		cds-WP_005252675.1	1		cds-WP_005251234.1	0.615076		cds-WP_005242814.1	0.536705		cds-WP_025432142.1	0.91952
cds-WP_005252702.1	1		cds-WP_005252702.1	1		cds-WP_025433397.1	0.807016		cds-WP_005252702.1	1		cds-WP_005251236.1	0.615076		cds-WP_025431917.1	0.536673		cds-WP_025431681.1	0.91946
cds-WP_005252708.1	1		cds-WP_005252708.1	1		cds-WP_005251080.1	0.80701		cds-WP_005252708.1	1		cds-WP_005251237.1	0.615076		cds-WP_005238788.1	0.536629		cds-WP_025431942.1	0.919141
cds-WP_005252714.1	1		cds-WP_005252714.1	1		cds-WP_005240442.1	0.806992		cds-WP_005252714.1	1		cds-WP_005251249.1	0.615076		cds-WP_025432296.1	0.536537		cds-WP_005239399.1	0.919126
cds-WP_005252725.1	1		cds-WP_005252725.1	1		cds-WP_005244576.1	0.80697		cds-WP_005252725.1	1		cds-WP_005251278.1	0.615076		cds-WP_005250992.1	0.536445		cds-WP_005251237.1	0.919119
cds-WP_005252732.1	1		cds-WP_005252732.1	1		cds-WP_005248911.1	0.806964		cds-WP_005252732.1	1		cds-WP_005251293.1	0.615076		cds-WP_005251301.1	0.536362		cds-WP_005242135.1	0.918944
cds-WP_005252734.1	1		cds-WP_005252734.1	1		cds-WP_164709508.1	0.806923		cds-WP_005252734.1	1		cds-WP_005251299.1	0.615076		cds-WP_005250487.1	0.536223		cds-WP_005251525.1	0.918888
cds-WP_005252737.1	1		cds-WP_005252737.1	1		cds-WP_005245010.1	0.806905		cds-WP_005252737.1	1		cds-WP_005251302.1	0.615076		cds-WP_025432880.1	0.536097		cds-WP_005249329.1	0.918871
cds-WP_005252745.1	1		cds-WP_005252745.1	1		cds-WP_005240995.1	0.806865		cds-WP_005252745.1	1		cds-WP_005251307.1	0.615076		cds-WP_025431648.1	0.536083		cds-WP_005243818.1	0.918755
cds-WP_005252752.1	1		cds-WP_005252752.1	1		cds-WP_005239409.1	0.806864		cds-WP_005252752.1	1		cds-WP_005251338.1	0.615076		cds-WP_005237899.1	0.535903		cds-WP_005243647.1	0.918587
cds-WP_005252757.1	1		cds-WP_005252757.1	1		cds-WP_025431559.1	0.806774		cds-WP_005252757.1	1		cds-WP_005251340.1	0.615076		cds-WP_005251957.1	0.535345		cds-WP_005238563.1	0.918554
cds-WP_005252774.1	1		cds-WP_005252774.1	1		cds-WP_005252134.1	0.806751		cds-WP_005252774.1	1		cds-WP_005251354.1	0.615076		cds-WP_005252412.1	0.535231		cds-WP_005243189.1	0.918473
cds-WP_005252780.1	1		cds-WP_005252780.1	1		cds-WP_005250836.1	0.806739		cds-WP_005252780.1	1		cds-WP_005251358.1	0.615076		cds-WP_005242434.1	0.535149		cds-WP_061044208.1	0.91846
cds-WP_005252783.1	1		cds-WP_005252783.1	1		cds-WP_005239585.1	0.806605		cds-WP_005252783.1	1		cds-WP_005251360.1	0.615076		cds-WP_005244798.1	0.534989		cds-WP_005248927.1	0.918453
cds-WP_005252784.1	1		cds-WP_005252784.1	1		cds-WP_005248809.1	0.806446		cds-WP_005252784.1	1		cds-WP_005251362.1	0.615076		cds-WP_005244521.1	0.534801		cds-WP_005250504.1	0.918433
cds-WP_005252787.1	1		cds-WP_005252787.1	1		cds-WP_025433225.1	0.806315		cds-WP_005252787.1	1		cds-WP_005251366.1	0.615076		cds-WP_005252291.1	0.534706		cds-WP_005244250.1	0.918396
cds-WP_005252788.1	1		cds-WP_005252788.1	1		cds-WP_005238799.1	0.806315		cds-WP_005252788.1	1		cds-WP_005251368.1	0.615076		cds-WP_025432678.1	0.534557		cds-WP_025432544.1	0.918387
cds-WP_005252792.1	1		cds-WP_005252792.1	1		cds-WP_005251967.1	0.806093		cds-WP_005252792.1	1		cds-WP_005251384.1	0.615076		cds-WP_025432931.1	0.534539		cds-WP_005240632.1	0.918345
cds-WP_005252794.1	1		cds-WP_005252794.1	1		cds-WP_005252078.1	0.806047		cds-WP_005252794.1	1		cds-WP_005251402.1	0.615076		cds-WP_005244886.1	0.534451		cds-WP_025433002.1	0.91834
cds-WP_005252807.1	1		cds-WP_005252807.1	1		cds-WP_025432337.1	0.805897		cds-WP_005252807.1	1		cds-WP_005251408.1	0.615076		cds-WP_025433267.1	0.534164		cds-WP_005239253.1	0.918255
cds-WP_005252825.1	1		cds-WP_005252825.1	1		cds-WP_005240077.1	0.805884		cds-WP_005252825.1	1		cds-WP_005251428.1	0.615076		cds-WP_226955510.1	0.533947		cds-WP_005243622.1	0.918157
cds-WP_005252827.1	1		cds-WP_005252827.1	1		cds-WP_005243514.1	0.80572		cds-WP_005252827.1	1		cds-WP_005251441.1	0.615076		cds-WP_025433575.1	0.533858		cds-WP_005252146.1	0.918106
cds-WP_005252838.1	1		cds-WP_005252838.1	1		cds-WP_025432007.1	0.805634		cds-WP_005252838.1	1		cds-WP_005251446.1	0.615076		cds-WP_025433642.1	0.533784		cds-WP_005240853.1	0.918083
cds-WP_005252845.1	1		cds-WP_005252845.1	1		cds-WP_005252137.1	0.805475		cds-WP_005252845.1	1		cds-WP_005251459.1	0.615076		cds-WP_007300914.1	0.533584		cds-WP_005248044.1	0.918061
cds-WP_005252847.1	1		cds-WP_005252847.1	1		cds-WP_005243624.1	0.805469		cds-WP_005252847.1	1		cds-WP_005251463.1	0.615076		cds-WP_005251524.1	0.533323		cds-WP_005240450.1	0.91798
cds-WP_005252860.1	1		cds-WP_005252860.1	1		cds-WP_005247281.1	0.805327		cds-WP_005252860.1	1		cds-WP_005251473.1	0.615076		cds-WP_025432937.1	0.533225		cds-WP_005248329.1	0.917836
cds-WP_005252863.1	1		cds-WP_005252863.1	1		cds-WP_025433519.1	0.805301		cds-WP_005252863.1	1		cds-WP_005251483.1	0.615076		cds-WP_025433012.1	0.533177		cds-WP_080578158.1	0.917783
cds-WP_005252872.1	1		cds-WP_005252872.1	1		cds-WP_025432602.1	0.805273		cds-WP_005252872.1	1		cds-WP_005251485.1	0.615076		cds-WP_025433074.1	0.533066		cds-WP_025432130.1	0.917775
cds-WP_005252881.1	1		cds-WP_005252881.1	1		cds-WP_226955768.1	0.80511		cds-WP_005252881.1	1		cds-WP_005251510.1	0.615076		cds-WP_005262890.1	0.532985		cds-WP_005239117.1	0.917755
cds-WP_005252883.1	1		cds-WP_005252883.1	1		cds-WP_025431770.1	0.805046		cds-WP_005252883.1	1		cds-WP_005251516.1	0.615076		cds-WP_226955656.1	0.532972		cds-WP_005248099.1	0.917738
cds-WP_005252894.1	1		cds-WP_005252894.1	1		cds-WP_005246612.1	0.804984		cds-WP_005252894.1	1		cds-WP_005251522.1	0.615076		cds-WP_005244518.1	0.532904		cds-WP_005259589.1	0.917574
cds-WP_005252897.1	1		cds-WP_005252897.1	1		cds-WP_005252262.1	0.804978		cds-WP_005252897.1	1		cds-WP_005251526.1	0.615076		cds-WP_005246353.1	0.53284		cds-WP_005239249.1	0.91754
cds-WP_005252900.1	1		cds-WP_005252900.1	1		cds-WP_025431825.1	0.804838		cds-WP_005252900.1	1		cds-WP_005251532.1	0.615076		cds-WP_025432858.1	0.532773		cds-WP_226955688.1	0.917502
cds-WP_005252901.1	1		cds-WP_005252901.1	1		cds-WP_005248479.1	0.804806		cds-WP_005252901.1	1		cds-WP_005251573.1	0.615076		cds-WP_005250788.1	0.532684		cds-WP_025431860.1	0.917477
cds-WP_005252902.1	1		cds-WP_005252902.1	1		cds-WP_005243581.1	0.80462		cds-WP_005252902.1	1		cds-WP_005251588.1	0.615076		cds-WP_005246399.1	0.532604		cds-WP_025432287.1	0.917467
cds-WP_005252904.1	1		cds-WP_005252904.1	1		cds-WP_005240016.1	0.804555		cds-WP_005252904.1	1		cds-WP_005251629.1	0.615076		cds-WP_005250773.1	0.532592		cds-WP_025432398.1	0.917335
cds-WP_005252917.1	1		cds-WP_005252917.1	1		cds-WP_005252946.1	0.804441		cds-WP_005252917.1	1		cds-WP_005251640.1	0.615076		cds-WP_005238133.1	0.532538		cds-WP_179443392.1	0.917214
cds-WP_005252920.1	1		cds-WP_005252920.1	1		cds-WP_005247366.1	0.804419		cds-WP_005252920.1	1		cds-WP_005251645.1	0.615076		cds-WP_005240352.1	0.532176		cds-WP_025433200.1	0.917036
cds-WP_005252922.1	1		cds-WP_005252922.1	1		cds-WP_005244527.1	0.804322		cds-WP_005252922.1	1		cds-WP_005251647.1	0.615076		cds-WP_005246077.1	0.532174		cds-WP_005244882.1	0.916996
cds-WP_005252927.1	1		cds-WP_005252927.1	1		cds-WP_005243927.1	0.804252		cds-WP_005252927.1	1		cds-WP_005251654.1	0.615076		cds-WP_025431952.1	0.532102		cds-K2Z90_RS22215	0.916966
cds-WP_005252930.1	1		cds-WP_005252930.1	1		cds-WP_025432261.1	0.804248		cds-WP_005252930.1	1		cds-WP_005251663.1	0.615076		cds-WP_005248641.1	0.5321		cds-WP_025432869.1	0.916919
cds-WP_005252934.1	1		cds-WP_005252934.1	1		cds-WP_005261420.1	0.804136		cds-WP_005252934.1	1		cds-WP_005251670.1	0.615076		cds-WP_025433230.1	0.532051		cds-WP_005247694.1	0.916783
cds-WP_005252937.1	1		cds-WP_005252937.1	1		cds-WP_005244751.1	0.804076		cds-WP_005252937.1	1		cds-WP_005251672.1	0.615076		cds-WP_005249468.1-2	0.531993		cds-WP_037179935.1	0.916701
cds-WP_005252942.1	1		cds-WP_005252942.1	1		cds-WP_005244886.1	0.803829		cds-WP_005252942.1	1		cds-WP_005251685.1	0.615076		cds-WP_005252900.1	0.531726		cds-WP_005238125.1	0.916694
cds-WP_005252943.1	1		cds-WP_005252943.1	1		cds-WP_005243052.1	0.803824		cds-WP_005252943.1	1		cds-WP_005251689.1	0.615076		cds-WP_226955715.1	0.5315		cds-WP_005251723.1	0.916606
cds-WP_005252944.1	1		cds-WP_005252944.1	1		cds-WP_005250130.1	0.803818		cds-WP_005252944.1	1		cds-WP_005251724.1	0.615076		cds-WP_005248013.1	0.531414		cds-WP_025431926.1	0.916576
cds-WP_005252945.1	1		cds-WP_005252945.1	1		cds-WP_005243139.1	0.803811		cds-WP_005252945.1	1		cds-WP_005251728.1	0.615076		cds-WP_005252275.1	0.53132		cds-WP_143767426.1	0.916533
cds-WP_005252946.1	1		cds-WP_005252946.1	1		cds-WP_005243889.1	0.803711		cds-WP_005252946.1	1		cds-WP_005251734.1	0.615076		cds-WP_005252377.1	0.531278		cds-WP_005249154.1	0.916405
cds-WP_005252949.1	1		cds-WP_005252949.1	1		cds-WP_005252241.1	0.803644		cds-WP_005252949.1	1		cds-WP_005251738.1	0.615076		cds-WP_005246087.1	0.531196		cds-WP_005573048.1	0.916283
cds-WP_005252955.1	1		cds-WP_005252955.1	1		cds-WP_005251624.1	0.803629		cds-WP_005252955.1	1		cds-WP_005251740.1	0.615076		cds-WP_005248501.1	0.530652		cds-WP_005246211.1	0.916156
cds-WP_005252956.1	1		cds-WP_005252956.1	1		cds-WP_005240409.1	0.803455		cds-WP_005252956.1	1		cds-WP_005251756.1	0.615076		cds-WP_005248529.1	0.530538		cds-WP_005239246.1	0.916125
cds-WP_005252958.1	1		cds-WP_005252958.1	1		cds-WP_005247408.1	0.803453		cds-WP_005252958.1	1		cds-WP_005251801.1	0.615076		cds-WP_005250094.1	0.53043		cds-WP_005237870.1	0.916113
cds-WP_005252959.1	1		cds-WP_005252959.1	1		cds-WP_005248821.1	0.803417		cds-WP_005252959.1	1		cds-WP_005251806.1	0.615076		cds-WP_005246602.1	0.530199		cds-WP_005248859.1	0.916039
cds-WP_005252960.1	1		cds-WP_005252960.1	1		cds-WP_025432373.1	0.803383		cds-WP_005252960.1	1		cds-WP_005251824.1	0.615076		cds-WP_025433323.1	0.529958		cds-WP_005248199.1	0.916037
cds-WP_005253188.1	1		cds-WP_005253188.1	1		cds-WP_005250480.1	0.803373		cds-WP_005253188.1	1		cds-WP_005251825.1	0.615076		cds-WP_025433414.1	0.529957		cds-WP_025432789.1	0.91603
cds-WP_005253670.1	1		cds-WP_005253670.1	1		cds-WP_005240999.1	0.803254		cds-WP_005253670.1	1		cds-WP_005251827.1	0.615076		cds-WP_005262018.1	0.529923		cds-WP_005238367.1	0.916007
cds-WP_005254209.1	1		cds-WP_005254209.1	1		cds-WP_005252152.1	0.80317		cds-WP_005254209.1	1		cds-WP_005251828.1	0.615076		cds-WP_005237825.1	0.529828		cds-WP_005258384.1	0.915915
cds-WP_005254252.1	1		cds-WP_005254252.1	1		cds-WP_005244180.1	0.803159		cds-WP_005254252.1	1		cds-WP_005251830.1	0.615076		cds-WP_037182503.1	0.529754		cds-WP_005250844.1	0.915887
cds-WP_005254660.1	1		cds-WP_005254660.1	1		cds-WP_025431600.1	0.803111		cds-WP_005254660.1	1		cds-WP_005251850.1	0.615076		cds-WP_025431763.1	0.529226		cds-WP_005248663.1	0.915622
cds-WP_005254663.1	1		cds-WP_005254663.1	1		cds-WP_005238877.1	0.802971		cds-WP_005254663.1	1		cds-WP_005251853.1	0.615076		cds-WP_025432342.1	0.529201		cds-WP_005248932.1	0.915507
cds-WP_005255234.1	1		cds-WP_005255234.1	1		cds-WP_005238418.1	0.802806		cds-WP_005255234.1	1		cds-WP_005251854.1	0.615076		cds-WP_005241326.1	0.52904		cds-WP_005248133.1	0.915454
cds-WP_005255435.1	1		cds-WP_005255435.1	1		cds-WP_005247694.1	0.802694		cds-WP_005255435.1	1		cds-WP_005251856.1	0.615076		cds-WP_005244023.1	0.529013		cds-WP_025432156.1	0.915413
cds-WP_005255533.1	1		cds-WP_005255533.1	1		cds-WP_025432406.1	0.802601		cds-WP_005255533.1	1		cds-WP_005251916.1	0.615076		cds-WP_005252567.1	0.52892		cds-WP_025431940.1	0.915343
cds-WP_005256282.1	1		cds-WP_005256282.1	1		cds-WP_005243820.1	0.802387		cds-WP_005256282.1	1		cds-WP_005251928.1	0.615076		cds-WP_025433244.1	0.528567		cds-WP_025433202.1	0.91531
cds-WP_005256362.1	1		cds-WP_005256362.1	1		cds-WP_005251853.1	0.802365		cds-WP_005256362.1	1		cds-WP_005251935.1	0.615076		cds-WP_005250990.1	0.528523		cds-WP_005250378.1	0.915257
cds-WP_005256369.1	1		cds-WP_005256369.1	1		cds-WP_005250616.1	0.802339		cds-WP_005256369.1	1		cds-WP_005251967.1	0.615076		cds-WP_005243762.1	0.5285		cds-WP_025432193.1	0.915229
cds-WP_005257351.1	1		cds-WP_005257351.1	1		cds-WP_025432254.1	0.802269		cds-WP_005257351.1	1		cds-WP_005251969.1	0.615076		cds-WP_005244214.1	0.528123		cds-WP_005238003.1	0.915092
cds-WP_005258138.1	1		cds-WP_005258138.1	1		cds-WP_005247559.1	0.802224		cds-WP_005258138.1	1		cds-WP_005251971.1	0.615076		cds-WP_005240831.1	0.528089		cds-WP_025433097.1	0.915028
cds-WP_005258203.1	1		cds-WP_005258203.1	1		cds-WP_005239275.1	0.802188		cds-WP_005258203.1	1		cds-WP_005251979.1	0.615076		cds-WP_005244775.1	0.527914		cds-WP_005244194.1	0.915006
cds-WP_005258295.1	1		cds-WP_005258295.1	1		cds-WP_005240494.1	0.802082		cds-WP_005258295.1	1		cds-WP_005251981.1	0.615076		cds-WP_226955717.1	0.527726		cds-WP_005248624.1	0.914872
cds-WP_005258384.1	1		cds-WP_005258384.1	1		cds-WP_226955633.1	0.802044		cds-WP_005258384.1	1		cds-WP_005251986.1	0.615076		cds-WP_005251189.1	0.527591		cds-WP_005244790.1	0.914834
cds-WP_005258512.1	1		cds-WP_005258512.1	1		cds-WP_025432612.1	0.802022		cds-WP_005258512.1	1		cds-WP_005251996.1	0.615076		cds-WP_005243120.1	0.527474		cds-WP_005251018.1	0.914796
cds-WP_005258596.1	1		cds-WP_005258596.1	1		cds-WP_226955519.1	0.802009		cds-WP_005258596.1	1		cds-WP_005251997.1	0.615076		cds-WP_005249981.1	0.527273		cds-WP_005244415.1	0.914738
cds-WP_005258713.1	1		cds-WP_005258713.1	1		cds-WP_005241028.1	0.801848		cds-WP_005258713.1	1		cds-WP_005252012.1	0.615076		cds-WP_005250455.1	0.527092		cds-WP_005237930.1	0.914708
cds-WP_005258779.1	1		cds-WP_005258779.1	1		cds-WP_264297255.1	0.801784		cds-WP_005258779.1	1		cds-WP_005252014.1	0.615076		cds-WP_005238594.1	0.527074		cds-WP_005238826.1	0.914696
cds-WP_005259110.1	1		cds-WP_005259110.1	1		cds-WP_025431650.1	0.80178		cds-WP_005259110.1	1		cds-WP_005252021.1	0.615076		cds-WP_187300232.1	0.526885		cds-WP_005247579.1	0.914629
cds-WP_005259626.1	1		cds-WP_005259626.1	1		cds-WP_005246658.1	0.80162		cds-WP_005259626.1	1		cds-WP_005252029.1	0.615076		cds-WP_005244953.1	0.526564		cds-WP_025431971.1	0.914579
cds-WP_005259666.1	1		cds-WP_005259666.1	1		cds-WP_005251047.1	0.801543		cds-WP_005259666.1	1		cds-WP_005252036.1	0.615076		cds-K2Z90_RS12205	0.526511		cds-WP_005238903.1	0.914579
cds-WP_005259920.1	1		cds-WP_005259920.1	1		cds-WP_005251018.1	0.801354		cds-WP_005259920.1	1		cds-WP_005252052.1	0.615076		cds-WP_025432810.1	0.526453		cds-WP_005243768.1	0.9145
cds-WP_005260190.1	1		cds-WP_005260190.1	1		cds-WP_025431912.1	0.801023		cds-WP_005260190.1	1		cds-WP_005252061.1	0.615076		cds-WP_005249126.1	0.526436		cds-WP_037179365.1	0.914388
cds-WP_005260370.1	1		cds-WP_005260370.1	1		cds-WP_005250571.1	0.800887		cds-WP_005260370.1	1		cds-WP_005252069.1	0.615076		cds-WP_005243927.1	0.526364		cds-WP_005252877.1	0.91433
cds-WP_005260374.1	1		cds-WP_005260374.1	1		cds-WP_005247697.1	0.800885		cds-WP_005260374.1	1		cds-WP_005252084.1	0.615076		cds-WP_005249079.1	0.526166		cds-WP_005242373.1	0.914153
cds-WP_005260402.1	1		cds-WP_005260402.1	1		cds-WP_005238898.1	0.800719		cds-WP_005260402.1	1		cds-WP_005252091.1	0.615076		cds-WP_025432814.1	0.526055		cds-WP_005241028.1	0.914132
cds-WP_005260882.1	1		cds-WP_005260882.1	1		cds-WP_005247861.1	0.800707		cds-WP_005260882.1	1		cds-WP_005252110.1	0.615076		cds-WP_025432370.1	0.526023		cds-WP_005245026.1	0.913943
cds-WP_005260937.1	1		cds-WP_005260937.1	1		cds-WP_025432992.1	0.800443		cds-WP_005260937.1	1		cds-WP_005252133.1	0.615076		cds-WP_005244999.1	0.52598		cds-WP_005247710.1	0.913877
cds-WP_005261100.1	1		cds-WP_005261100.1	1		cds-WP_005251760.1	0.800432		cds-WP_005261100.1	1		cds-WP_005252152.1	0.615076		cds-WP_005244194.1	0.525913		cds-WP_005240730.1	0.913848
cds-WP_005261240.1	1		cds-WP_005261240.1	1		cds-WP_005250075.1	0.800424		cds-WP_005261240.1	1		cds-WP_005252154.1	0.615076		cds-WP_005250849.1	0.525906		cds-WP_226955804.1	0.913699
cds-WP_005261263.1	1		cds-WP_005261263.1	1		cds-WP_005250039.1	0.800351		cds-WP_005261263.1	1		cds-WP_005252172.1	0.615076		cds-WP_005248326.1	0.525844		cds-WP_025432268.1	0.913691
cds-WP_005261284.1	1		cds-WP_005261284.1	1		cds-WP_005252457.1	0.800348		cds-WP_005261284.1	1		cds-WP_005252176.1	0.615076		cds-WP_005248141.1	0.525743		cds-WP_005243925.1	0.913684
cds-WP_005261286.1	1		cds-WP_005261286.1	1		cds-WP_025433598.1	0.800257		cds-WP_005261286.1	1		cds-WP_005252180.1	0.615076		cds-WP_005250989.1	0.525663		cds-WP_025432905.1	0.91367
cds-WP_005261289.1	1		cds-WP_005261289.1	1		cds-WP_025431609.1	0.800179		cds-WP_005261289.1	1		cds-WP_005252194.1	0.615076		cds-WP_005250766.1	0.525527		cds-WP_005251059.1	0.913608
cds-WP_005261420.1	1		cds-WP_005261420.1	1		cds-WP_025432285.1	0.800151		cds-WP_005261420.1	1		cds-WP_005252198.1	0.615076		cds-WP_025432845.1	0.525387		cds-WP_005252452.1	0.913523
cds-WP_005262018.1	1		cds-WP_005262018.1	1		cds-WP_025432394.1	0.800145		cds-WP_005262018.1	1		cds-WP_005252199.1	0.615076		cds-WP_005248663.1	0.525333		cds-WP_025432817.1	0.913331
cds-WP_005262275.1	1		cds-WP_005262275.1	1		cds-WP_025431835.1	0.800053		cds-WP_005262275.1	1		cds-WP_005252212.1	0.615076		cds-WP_037181844.1	0.525261		cds-WP_025432680.1	0.913325
cds-WP_005262316.1	1		cds-WP_005262316.1	1		cds-WP_005241020.1	0.799787		cds-WP_005262316.1	1		cds-WP_005252231.1	0.615076		cds-WP_005240884.1	0.525216		cds-WP_005240969.1	0.913155
cds-WP_005262890.1	1		cds-WP_005262890.1	1		cds-WP_005250367.1	0.799749		cds-WP_005262890.1	1		cds-WP_005252240.1	0.615076		cds-WP_005248272.1	0.525093		cds-WP_005246612.1	0.91315
cds-WP_005263473.1	1		cds-WP_005263473.1	1		cds-WP_187300223.1	0.799537		cds-WP_005263473.1	1		cds-WP_005252249.1	0.615076		cds-WP_025432003.1	0.525085		cds-WP_005247366.1	0.913116
cds-WP_005263480.1	1		cds-WP_005263480.1	1		cds-WP_043943812.1	0.799492		cds-WP_005263480.1	1		cds-WP_005252264.1	0.615076		cds-WP_005243590.1	0.525013		cds-WP_025433288.1	0.913112
cds-WP_005263664.1	1		cds-WP_005263664.1	1		cds-WP_025433611.1	0.799486		cds-WP_005263664.1	1		cds-WP_005252268.1	0.615076		cds-WP_005241412.1	0.524976		cds-WP_025433088.1	0.913025
cds-WP_005264648.1	1		cds-WP_005264648.1	1		cds-WP_005251594.1	0.799328		cds-WP_005264648.1	1		cds-WP_005252291.1	0.615076		cds-WP_025433059.1	0.524963		cds-WP_005238567.1	0.912997
cds-WP_005264659.1	1		cds-WP_005264659.1	1		cds-WP_005252316.1	0.799263		cds-WP_005264659.1	1		cds-WP_005252296.1	0.615076		cds-WP_005251046.1	0.524861		cds-WP_005244912.1	0.912966
cds-WP_005264833.1	1		cds-WP_005264833.1	1		cds-WP_005243981.1	0.799223		cds-WP_005264833.1	1		cds-WP_005252299.1	0.615076		cds-WP_005240741.1	0.524676		cds-WP_005252909.1	0.912912
cds-WP_005561362.1	1		cds-WP_005561362.1	1		cds-WP_005237902.1	0.799208		cds-WP_005561362.1	1		cds-WP_005252306.1	0.615076		cds-WP_005237792.1	0.524308		cds-WP_005240336.1	0.912907
cds-WP_005563039.1	1		cds-WP_005563039.1	1		cds-WP_005252172.1	0.799136		cds-WP_005563039.1	1		cds-WP_005252308.1	0.615076		cds-WP_005244981.1	0.524209		cds-WP_005252261.1	0.912707
cds-WP_005563339.1	1		cds-WP_005563339.1	1		cds-WP_005244595.1	0.799134		cds-WP_005563339.1	1		cds-WP_005252314.1	0.615076		cds-WP_005248511.1	0.52409		cds-WP_005247355.1	0.912676
cds-WP_005564952.1	1		cds-WP_005564952.1	1		cds-WP_025432158.1	0.798826		cds-WP_005564952.1	1		cds-WP_005252332.1	0.615076		cds-WP_005251728.1	0.523999		cds-WP_005252920.1	0.912584
cds-WP_005566972.1	1		cds-WP_005566972.1	1		cds-WP_005238508.1	0.798762		cds-WP_005566972.1	1		cds-WP_005252355.1	0.615076		cds-WP_226955848.1	0.523745		cds-WP_005240135.1	0.912535
cds-WP_005568279.1	1		cds-WP_005568279.1	1		cds-WP_005258713.1	0.798674		cds-WP_005568279.1	1		cds-WP_005252360.1	0.615076		cds-WP_005252355.1	0.523705		cds-WP_025432145.1	0.912524
cds-WP_005570063.1	1		cds-WP_005570063.1	1		cds-WP_005240266.1	0.798636		cds-WP_005570063.1	1		cds-WP_005252376.1	0.615076		cds-WP_005242982.1	0.523539		cds-WP_005240575.1	0.912507
cds-WP_005573048.1	1		cds-WP_005573048.1	1		cds-WP_005250844.1	0.798613		cds-WP_005573048.1	1		cds-WP_005252380.1	0.615076		cds-WP_005250814.1	0.523313		cds-WP_005238789.1	0.912378
cds-WP_005573288.1	1		cds-WP_005573288.1	1		cds-WP_005239980.1	0.79857		cds-WP_005573288.1	1		cds-WP_005252385.1	0.615076		cds-WP_025432128.1	0.523299		cds-WP_025431570.1	0.912335
cds-WP_005573403.1	1		cds-WP_005573403.1	1		cds-WP_025432310.1	0.798377		cds-WP_005573403.1	1		cds-WP_005252398.1	0.615076		cds-WP_025432896.1	0.52325		cds-WP_005248842.1	0.91212
cds-WP_005573887.1	1		cds-WP_005573887.1	1		cds-WP_025431881.1	0.798369		cds-WP_005573887.1	1		cds-WP_005252400.1	0.615076		cds-WP_025432210.1	0.523072		cds-WP_005248464.1	0.912093
cds-WP_005573961.1	1		cds-WP_005573961.1	1		cds-WP_005240923.1	0.798327		cds-WP_005573961.1	1		cds-WP_005252403.1	0.615076		cds-WP_005251221.1	0.523041		cds-WP_005244189.1	0.912086
cds-WP_005575144.1	1		cds-WP_005575144.1	1		cds-WP_025431549.1	0.798279		cds-WP_005575144.1	1		cds-WP_005252417.1	0.615076		cds-WP_005243887.1	0.522972		cds-WP_025432900.1	0.912056
cds-WP_007295767.1	1		cds-WP_007295767.1	1		cds-WP_005248924.1	0.798029		cds-WP_007295767.1	1		cds-WP_005252419.1	0.615076		cds-WP_037183109.1	0.522843		cds-WP_005239502.1	0.912016
cds-WP_007300914.1	1		cds-WP_007300914.1	1		cds-WP_005252672.1	0.797871		cds-WP_007300914.1	1		cds-WP_005252423.1	0.615076		cds-WP_025433082.1	0.522826		cds-WP_005246675.1	0.911849
cds-WP_009474169.1	1		cds-WP_009474169.1	1		cds-WP_005244644.1	0.797843		cds-WP_009474169.1	1		cds-WP_005252438.1	0.615076		cds-WP_005244415.1	0.52281		cds-WP_005250111.1	0.91178
cds-WP_009474702.1	1		cds-WP_009474702.1	1		cds-WP_025432251.1	0.797724		cds-WP_009474702.1	1		cds-WP_005252443.1	0.615076		cds-WP_005247870.1	0.522789		cds-WP_005251223.1	0.911773
cds-WP_009475022.1	1		cds-WP_009475022.1	1		cds-WP_025432940.1	0.797724		cds-WP_009475022.1	1		cds-WP_005252452.1	0.615076		cds-WP_025433556.1	0.522734		cds-WP_025432880.1	0.911706
cds-WP_009478066.1	1		cds-WP_009478066.1	1		cds-WP_005237924.1	0.797687		cds-WP_009478066.1	1		cds-WP_005252456.1	0.615076		cds-WP_005249067.1	0.522681		cds-WP_005246240.1	0.911704
cds-WP_009480441.1	1		cds-WP_009480441.1	1		cds-WP_005256369.1	0.797628		cds-WP_009480441.1	1		cds-WP_005252457.1	0.615076		cds-WP_005244820.1	0.522573		cds-WP_005244524.1	0.911657
cds-WP_011596606.1	1		cds-WP_011596606.1	1		cds-WP_037182698.1	0.7975		cds-WP_011596606.1	1		cds-WP_005252461.1	0.615076		cds-WP_005243468.1	0.522486		cds-WP_025432100.1	0.911618
cds-WP_011596917.1	1		cds-WP_011596917.1	1		cds-WP_005239068.1	0.797406		cds-WP_011596917.1	1		cds-WP_005252469.1	0.615076		cds-WP_005246233.1	0.522285		cds-WP_005238251.1	0.911602
cds-WP_016882791.1	1		cds-WP_016882791.1	1		cds-WP_005243060.1	0.797082		cds-WP_016882791.1	1		cds-WP_005252476.1	0.615076		cds-WP_005238076.1	0.52217		cds-WP_005238723.1	0.911568
cds-WP_016883983.1	1		cds-WP_016883983.1	1		cds-WP_005248746.1	0.796921		cds-WP_016883983.1	1		cds-WP_005252478.1	0.615076		cds-WP_025433248.1	0.522141		cds-WP_025433323.1	0.911557
cds-WP_025431546.1	1		cds-WP_025431546.1	1		cds-WP_226955698.1	0.796918		cds-WP_025431546.1	1		cds-WP_005252497.1	0.615076		cds-WP_005238103.1	0.52201		cds-WP_005237763.1	0.911541
cds-WP_025431549.1	1		cds-WP_025431549.1	1		cds-WP_005251801.1	0.796881		cds-WP_025431549.1	1		cds-WP_005252501.1	0.615076		cds-WP_005251663.1	0.521874		cds-WP_005240728.1	0.911538
cds-WP_025431558.1	1		cds-WP_025431558.1	1		cds-WP_005239302.1	0.796739		cds-WP_025431558.1	1		cds-WP_005252514.1	0.615076		cds-WP_005250760.1	0.521846		cds-WP_005244135.1	0.911342
cds-WP_025431559.1	1		cds-WP_025431559.1	1		cds-WP_025433091.1	0.796439		cds-WP_025431559.1	1		cds-WP_005252530.1	0.615076		cds-WP_037181344.1	0.521753		cds-WP_005243954.1	0.911337
cds-WP_025431564.1	1		cds-WP_025431564.1	1		cds-WP_025433055.1	0.796295		cds-WP_025431564.1	1		cds-WP_005252532.1	0.615076		cds-WP_005244499.1	0.521399		cds-WP_005259694.1	0.911209
cds-WP_025431565.1	1		cds-WP_025431565.1	1		cds-WP_005251936.1	0.796198		cds-WP_025431565.1	1		cds-WP_005252542.1	0.615076		cds-WP_025432207.1	0.521331		cds-WP_037179341.1	0.911183
cds-WP_025431571.1	1		cds-WP_025431571.1	1		cds-WP_005242964.1	0.796125		cds-WP_025431571.1	1		cds-WP_005252560.1	0.615076		cds-WP_025431647.1	0.52131		cds-WP_005251101.1	0.911171
cds-WP_025431577.1	1		cds-WP_025431577.1	1		cds-WP_005239362.1	0.796024		cds-WP_025431577.1	1		cds-WP_005252571.1	0.615076		cds-WP_005248344.1	0.52117		cds-WP_005240666.1	0.911114
cds-WP_025431578.1	1		cds-WP_025431578.1	1		cds-WP_005239544.1	0.795964		cds-WP_025431578.1	1		cds-WP_005252578.1	0.615076		cds-WP_005244137.1	0.520876		cds-WP_025433054.1	0.911032
cds-WP_025431580.1	1		cds-WP_025431580.1	1		cds-WP_005244052.1	0.795816		cds-WP_025431580.1	1		cds-WP_005252593.1	0.615076		cds-WP_005247736.1	0.520805		cds-WP_005252938.1	0.911029
cds-WP_025431581.1	1		cds-WP_025431581.1	1		cds-WP_005251428.1	0.795711		cds-WP_025431581.1	1		cds-WP_005252605.1	0.615076		cds-WP_005238609.1	0.52055		cds-WP_005248480.1	0.910972
cds-WP_025431584.1	1		cds-WP_025431584.1	1		cds-WP_005237839.1	0.795628		cds-WP_025431584.1	1		cds-WP_005252671.1	0.615076		cds-WP_005256574.1	0.52041		cds-WP_025433325.1	0.910928
cds-WP_025431586.1	1		cds-WP_025431586.1	1		cds-WP_005250966.1	0.795409		cds-WP_025431586.1	1		cds-WP_005252672.1	0.615076		cds-WP_005238454.1	0.520332		cds-WP_025431896.1	0.910872
cds-WP_025431592.1	1		cds-WP_025431592.1	1		cds-WP_005248601.1	0.795219		cds-WP_025431592.1	1		cds-WP_005252675.1	0.615076		cds-WP_005249734.1	0.520251		cds-WP_025431909.1	0.910776
cds-WP_025431594.1	1		cds-WP_025431594.1	1		cds-WP_005252702.1	0.795215		cds-WP_025431594.1	1		cds-WP_005252702.1	0.615076		cds-WP_025433512.1	0.520227		cds-WP_005252178.1	0.910658
cds-WP_025431598.1	1		cds-WP_025431598.1	1		cds-WP_025432172.1	0.795098		cds-WP_025431598.1	1		cds-WP_005252737.1	0.615076		cds-WP_005252137.1	0.520207		cds-WP_005237793.1	0.910577
cds-WP_025431600.1	1		cds-WP_025431600.1	1		cds-WP_005239990.1	0.795068		cds-WP_025431600.1	1		cds-WP_005252745.1	0.615076		cds-WP_005239957.1	0.520193		cds-WP_025432824.1	0.910573
cds-WP_025431609.1	1		cds-WP_025431609.1	1		cds-WP_005250814.1	0.795068		cds-WP_025431609.1	1		cds-WP_005252752.1	0.615076		cds-WP_005252752.1	0.520002		cds-WP_005252240.1	0.910527
cds-WP_025431612.1	1		cds-WP_025431612.1	1		cds-WP_005239875.1	0.795026		cds-WP_025431612.1	1		cds-WP_005252757.1	0.615076		cds-WP_005240645.1	0.519985		cds-WP_005244770.1	0.910452
cds-WP_025431615.1	1		cds-WP_025431615.1	1		cds-WP_005249980.1	0.794836		cds-WP_025431615.1	1		cds-WP_005252780.1	0.615076		cds-WP_005248522.1	0.51998		cds-WP_005252774.1	0.910415
cds-WP_025431617.1	1		cds-WP_025431617.1	1		cds-WP_025433405.1	0.794832		cds-WP_025431617.1	1		cds-WP_005252783.1	0.615076		cds-WP_005248476.1	0.519808		cds-WP_005250091.1	0.910405
cds-WP_025431618.1	1		cds-WP_025431618.1	1		cds-WP_037179069.1	0.794814		cds-WP_025431618.1	1		cds-WP_005252784.1	0.615076		cds-WP_005251172.1	0.519767		cds-WP_005248165.1	0.910372
cds-WP_025431630.1	1		cds-WP_025431630.1	1		cds-WP_005255234.1	0.794808		cds-WP_025431630.1	1		cds-WP_005252787.1	0.615076		cds-WP_005239215.1	0.51967		cds-WP_005248730.1	0.91037
cds-WP_025431633.1	1		cds-WP_025431633.1	1		cds-WP_005248710.1	0.794799		cds-WP_025431633.1	1		cds-WP_005252794.1	0.615076		cds-WP_005249218.1	0.51967		cds-WP_005252421.1	0.910265
cds-WP_025431634.1	1		cds-WP_025431634.1	1		cds-WP_025432393.1	0.794722		cds-WP_025431634.1	1		cds-WP_005252807.1	0.615076		cds-WP_226955855.1	0.519445		cds-WP_005240427.1	0.910234
cds-WP_025431635.1	1		cds-WP_025431635.1	1		cds-WP_005249194.1	0.794714		cds-WP_025431635.1	1		cds-WP_005252811.1	0.615076		cds-WP_037179142.1	0.519136		cds-WP_005251545.1	0.910195
cds-WP_025431636.1	1		cds-WP_025431636.1	1		cds-WP_005250092.1	0.794625		cds-WP_025431636.1	1		cds-WP_005252825.1	0.615076		cds-WP_005248500.1	0.519066		cds-WP_043943824.1	0.910178
cds-WP_025431638.1	1		cds-WP_025431638.1	1		cds-WP_025432527.1	0.794497		cds-WP_025431638.1	1		cds-WP_005252827.1	0.615076		cds-WP_005238743.1	0.518883		cds-WP_025433621.1	0.910043
cds-WP_025431641.1	1		cds-WP_025431641.1	1		cds-WP_005244444.1	0.794457		cds-WP_025431641.1	1		cds-WP_005252860.1	0.615076		cds-WP_005252069.1	0.518737		cds-WP_226955606.1	0.910005
cds-WP_025431642.1	1		cds-WP_025431642.1	1		cds-WP_005244223.1	0.794398		cds-WP_025431642.1	1		cds-WP_005252891.1	0.615076		cds-WP_005240535.1	0.518366		cds-WP_025431970.1	0.909993
cds-WP_025431644.1	1		cds-WP_025431644.1	1		cds-WP_025433336.1	0.794358		cds-WP_025431644.1	1		cds-WP_005252900.1	0.615076		cds-WP_005239374.1	0.518293		cds-WP_005247726.1	0.909956
cds-WP_025431648.1	1		cds-WP_025431648.1	1		cds-WP_005246405.1	0.794176		cds-WP_025431648.1	1		cds-WP_005252902.1	0.615076		cds-WP_005247733.1	0.517993		cds-WP_005238592.1	0.90982
cds-WP_025431649.1	1		cds-WP_025431649.1	1		cds-WP_005247372.1	0.794123		cds-WP_025431649.1	1		cds-WP_005252919.1	0.615076		cds-WP_005251153.1	0.517947		cds-WP_005252150.1	0.909802
cds-WP_025431650.1	1		cds-WP_025431650.1	1		cds-WP_005252394.1	0.794108		cds-WP_025431650.1	1		cds-WP_005252920.1	0.615076		cds-WP_005252194.1	0.517824		cds-WP_025432806.1	0.90976
cds-WP_025431653.1	1		cds-WP_025431653.1	1		cds-WP_226955715.1	0.794045		cds-WP_025431653.1	1		cds-WP_005252926.1	0.615076		cds-WP_005250127.1	0.517744		cds-WP_005249153.1	0.909759
cds-WP_025431658.1	1		cds-WP_025431658.1	1		cds-WP_025433581.1	0.793844		cds-WP_025431658.1	1		cds-WP_005252927.1	0.615076		cds-WP_025432642.1	0.517432		cds-WP_005240256.1	0.909441
cds-WP_025431663.1	1		cds-WP_025431663.1	1		cds-WP_005252014.1	0.793799		cds-WP_025431663.1	1		cds-WP_005252932.1	0.615076		cds-WP_005247353.1	0.51743		cds-WP_037183006.1	0.909396
cds-WP_025431665.1	1		cds-WP_025431665.1	1		cds-WP_005238771.1	0.793779		cds-WP_025431665.1	1		cds-WP_005252937.1	0.615076		cds-WP_005252261.1	0.517335		cds-WP_005246518.1	0.909384
cds-WP_025431667.1	1		cds-WP_025431667.1	1		cds-WP_005252708.1	0.79374		cds-WP_025431667.1	1		cds-WP_005252941.1	0.615076		cds-WP_005242894.1	0.517295		cds-WP_005240367.1	0.909347
cds-WP_025431670.1	1		cds-WP_025431670.1	1		cds-WP_005240767.1	0.793687		cds-WP_025431670.1	1		cds-WP_005252942.1	0.615076		cds-WP_005251427.1	0.517269		cds-WP_025433311.1	0.909347
cds-WP_025431674.1	1		cds-WP_025431674.1	1		cds-WP_025431873.1	0.793597		cds-WP_025431674.1	1		cds-WP_005252945.1	0.615076		cds-WP_005249032.1	0.517197		cds-WP_005251814.1	0.909328
cds-WP_025431676.1	1		cds-WP_025431676.1	1		cds-WP_005248626.1	0.79351		cds-WP_025431676.1	1		cds-WP_005252955.1	0.615076		cds-WP_005251525.1	0.517189		cds-WP_005240533.1	0.909321
cds-WP_025431677.1	1		cds-WP_025431677.1	1		cds-WP_043943950.1	0.793397		cds-WP_025431677.1	1		cds-WP_005252960.1	0.615076		cds-WP_005238856.1	0.517136		cds-WP_025432353.1	0.909218
cds-WP_025431679.1	1		cds-WP_025431679.1	1		cds-WP_005242798.1	0.79339		cds-WP_025431679.1	1		cds-WP_005252963.1	0.615076		cds-WP_005251638.1	0.51669		cds-WP_005246120.1	0.908939
cds-WP_025431682.1	1		cds-WP_025431682.1	1		cds-WP_005249301.1	0.793358		cds-WP_025431682.1	1		cds-WP_005253373.1	0.615076		cds-WP_226955721.1	0.516662		cds-WP_025431886.1	0.908877
cds-WP_025431685.1	1		cds-WP_025431685.1	1		cds-WP_005251495.1	0.793131		cds-WP_025431685.1	1		cds-WP_005253439.1	0.615076		cds-WP_025432164.1	0.516588		cds-WP_005238331.1	0.908877
cds-WP_025431691.1	1		cds-WP_025431691.1	1		cds-WP_005252542.1	0.793097		cds-WP_025431691.1	1		cds-WP_005254482.1	0.615076		cds-WP_005251048.1	0.516435		cds-WP_005239421.1	0.90875
cds-WP_025431694.1	1		cds-WP_025431694.1	1		cds-WP_005252944.1	0.793085		cds-WP_025431694.1	1		cds-WP_005255030.1	0.615076		cds-WP_005251023.1	0.516435		cds-WP_005242363.1	0.908683
cds-WP_025431701.1	1		cds-WP_025431701.1	1		cds-WP_005245250.1	0.793066		cds-WP_025431701.1	1		cds-WP_005255234.1	0.615076		cds-WP_005251372.1	0.51636		cds-WP_005566524.1	0.908623
cds-WP_025431702.1	1		cds-WP_025431702.1	1		cds-WP_005249635.1	0.792888		cds-WP_025431702.1	1		cds-WP_005255435.1	0.615076		cds-WP_005246120.1	0.516355		cds-WP_005244922.1	0.908583
cds-WP_025431703.1	1		cds-WP_025431703.1	1		cds-WP_005243071.1	0.792849		cds-WP_025431703.1	1		cds-WP_005256089.1	0.615076		cds-WP_005241757.1	0.516325		cds-WP_005241881.1	0.908521
cds-WP_025431705.1	1		cds-WP_025431705.1	1		cds-WP_005247962.1	0.792812		cds-WP_025431705.1	1		cds-WP_005256282.1	0.615076		cds-WP_025432924.1	0.516023		cds-WP_005244070.1	0.908484
cds-WP_025431715.1	1		cds-WP_025431715.1	1		cds-WP_025431724.1	0.792789		cds-WP_025431715.1	1		cds-WP_005256369.1	0.615076		cds-WP_005238369.1	0.515952		cds-WP_005252052.1	0.908454
cds-WP_025431724.1	1		cds-WP_025431724.1	1		cds-WP_005238600.1	0.7926		cds-WP_025431724.1	1		cds-WP_005256569.1	0.615076		cds-WP_005247587.1	0.515842		cds-WP_005252844.1	0.908387
cds-WP_025431725.1	1		cds-WP_025431725.1	1		cds-WP_005244430.1	0.792583		cds-WP_025431725.1	1		cds-WP_005258232.1	0.615076		cds-WP_005248827.1	0.515758		cds-WP_005252344.1	0.908284
cds-WP_025431733.1	1		cds-WP_025431733.1	1		cds-WP_005249153.1	0.792466		cds-WP_025431733.1	1		cds-WP_005258295.1	0.615076		cds-WP_025432821.1	0.515569		cds-WP_005244162.1	0.908195
cds-WP_025431734.1	1		cds-WP_025431734.1	1		cds-WP_025433525.1	0.792459		cds-WP_025431734.1	1		cds-WP_005258323.1	0.615076		cds-WP_005245024.1	0.515496		cds-WP_005240022.1	0.908189
cds-WP_025431738.1	1		cds-WP_025431738.1	1		cds-WP_005242725.1	0.792419		cds-WP_025431738.1	1		cds-WP_005258779.1	0.615076		cds-WP_025432905.1	0.515247		cds-WP_025431701.1	0.908188
cds-WP_025431739.1	1		cds-WP_025431739.1	1		cds-WP_005248345.1	0.792413		cds-WP_025431739.1	1		cds-WP_005259110.1	0.615076		cds-WP_005261272.1	0.515171		cds-WP_005252413.1	0.908161
cds-WP_025431743.1	1		cds-WP_025431743.1	1		cds-WP_005244634.1	0.792406		cds-WP_025431743.1	1		cds-WP_005259336.1	0.615076		cds-WP_005243925.1	0.515046		cds-WP_005249734.1	0.908015
cds-WP_025431744.1	1		cds-WP_025431744.1	1		cds-WP_005250502.1	0.792406		cds-WP_025431744.1	1		cds-WP_005259589.1	0.615076		cds-WP_005250571.1	0.515013		cds-WP_005241678.1	0.90795
cds-WP_025431747.1	1		cds-WP_025431747.1	1		cds-WP_005249327.1	0.792387		cds-WP_025431747.1	1		cds-WP_005259626.1	0.615076		cds-WP_005243086.1	0.515012		cds-WP_005249695.1	0.907869
cds-WP_025431763.1	1		cds-WP_025431763.1	1		cds-WP_005238498.1	0.792378		cds-WP_025431763.1	1		cds-WP_005259666.1	0.615076		cds-K2Z90_RS12190	0.514666		cds-WP_005241711.1	0.907706
cds-WP_025431766.1	1		cds-WP_025431766.1	1		cds-WP_005251592.1	0.792375		cds-WP_025431766.1	1		cds-WP_005260038.1	0.615076		cds-WP_005250837.1	0.514646		cds-WP_037181844.1	0.907693
cds-WP_025431767.1	1		cds-WP_025431767.1	1		cds-WP_005238652.1	0.792359		cds-WP_025431767.1	1		cds-WP_005260190.1	0.615076		cds-WP_005248247.1	0.51452		cds-WP_005238526.1	0.907672
cds-WP_025431770.1	1		cds-WP_025431770.1	1		cds-WP_005241365.1	0.792348		cds-WP_025431770.1	1		cds-WP_005260290.1	0.615076		cds-WP_005247918.1	0.514298		cds-WP_005249118.1	0.907618
cds-WP_025431771.1	1		cds-WP_025431771.1	1		cds-WP_025432211.1	0.792163		cds-WP_025431771.1	1		cds-WP_005260370.1	0.615076		cds-WP_005259110.1	0.514125		cds-WP_005243581.1	0.907464
cds-WP_025431775.1	1		cds-WP_025431775.1	1		cds-WP_231913898.1	0.792145		cds-WP_025431775.1	1		cds-WP_005260402.1	0.615076		cds-WP_025433612.1	0.513745		cds-WP_005248750.1	0.907456
cds-WP_025431777.1	1		cds-WP_025431777.1	1		cds-WP_005244569.1	0.792139		cds-WP_025431777.1	1		cds-WP_005260882.1	0.615076		cds-K2Z90_RS27905	0.513602		cds-WP_037182526.1	0.907434
cds-WP_025431779.1	1		cds-WP_025431779.1	1		cds-WP_226955525.1	0.792082		cds-WP_025431779.1	1		cds-WP_005261055.1	0.615076		cds-WP_005246623.1	0.513569		cds-WP_025431633.1	0.9074
cds-WP_025431780.1	1		cds-WP_025431780.1	1		cds-WP_025433247.1	0.792057		cds-WP_025431780.1	1		cds-WP_005261263.1	0.615076		cds-WP_005239335.1	0.51339		cds-WP_005244302.1	0.907338
cds-WP_025431781.1	1		cds-WP_025431781.1	1		cds-WP_005243030.1	0.792034		cds-WP_025431781.1	1		cds-WP_005261289.1	0.615076		cds-WP_005246518.1	0.513294		cds-WP_005251479.1	0.907281
cds-WP_025431792.1	1		cds-WP_025431792.1	1		cds-WP_005248970.1	0.791455		cds-WP_025431792.1	1		cds-WP_005261420.1	0.615076		cds-WP_005237789.1	0.512838		cds-WP_005247663.1	0.907242
cds-WP_025431796.1	1		cds-WP_025431796.1	1		cds-WP_005244070.1	0.791178		cds-WP_025431796.1	1		cds-WP_005262018.1	0.615076		cds-WP_005244966.1	0.512351		cds-WP_005248152.1	0.90723
cds-WP_025431800.1	1		cds-WP_025431800.1	1		cds-WP_025432268.1	0.7911		cds-WP_025431800.1	1		cds-WP_005262275.1	0.615076		cds-WP_005239691.1	0.51227		cds-WP_005252927.1	0.907098
cds-WP_025431803.1	1		cds-WP_025431803.1	1		cds-WP_005251203.1	0.791098		cds-WP_025431803.1	1		cds-WP_005262298.1	0.615076		cds-WP_005243974.1	0.512172		cds-WP_005239311.1	0.90705
cds-WP_025431812.1	1		cds-WP_025431812.1	1		cds-WP_005239426.1	0.790919		cds-WP_025431812.1	1		cds-WP_005262316.1	0.615076		cds-WP_005239390.1	0.512147		cds-WP_005244873.1	0.907033
cds-WP_025431815.1	1		cds-WP_025431815.1	1		cds-WP_025433136.1	0.79064		cds-WP_025431815.1	1		cds-WP_005262890.1	0.615076		cds-WP_005252403.1	0.511951		cds-WP_005242359.1	0.907021
cds-WP_025431816.1	1		cds-WP_025431816.1	1		cds-WP_037179080.1	0.790525		cds-WP_025431816.1	1		cds-WP_005263481.1	0.615076		cds-WP_025431635.1	0.511912		cds-WP_025431829.1	0.906966
cds-WP_025431817.1	1		cds-WP_025431817.1	1		cds-WP_005239891.1	0.790487		cds-WP_025431817.1	1		cds-WP_005263616.1	0.615076		cds-WP_005242958.1	0.511907		cds-WP_005251913.1	0.906951
cds-WP_025431818.1	1		cds-WP_025431818.1	1		cds-WP_025431641.1	0.790472		cds-WP_025431818.1	1		cds-WP_005263664.1	0.615076		cds-WP_005250488.1	0.511865		cds-WP_005239930.1	0.906951
cds-WP_025431822.1	1		cds-WP_025431822.1	1		cds-WP_025433231.1	0.790352		cds-WP_025431822.1	1		cds-WP_005263839.1	0.615076		cds-WP_025431870.1	0.511789		cds-WP_005244615.1	0.906795
cds-WP_025431825.1	1		cds-WP_025431825.1	1		cds-WP_005245014.1	0.790327		cds-WP_025431825.1	1		cds-WP_005263993.1	0.615076		cds-WP_005238388.1	0.511382		cds-WP_005247450.1	0.906764
cds-WP_025431830.1	1		cds-WP_025431830.1	1		cds-WP_005244897.1	0.790295		cds-WP_025431830.1	1		cds-WP_005561159.1	0.615076		cds-WP_025433079.1	0.511349		cds-WP_005238450.1	0.906614
cds-WP_025431832.1	1		cds-WP_025431832.1	1		cds-WP_025433506.1	0.790291		cds-WP_025431832.1	1		cds-WP_005563039.1	0.615076		cds-WP_005251540.1	0.511039		cds-WP_005244734.1	0.906605
cds-WP_025431835.1	1		cds-WP_025431835.1	1		cds-WP_005237828.1	0.790288		cds-WP_025431835.1	1		cds-WP_005564952.1	0.615076		cds-WP_025433600.1	0.51103		cds-WP_005248823.1	0.906599
cds-WP_025431836.1	1		cds-WP_025431836.1	1		cds-WP_005243633.1	0.790276		cds-WP_025431836.1	1		cds-WP_005566090.1	0.615076		cds-WP_025431582.1	0.511017		cds-WP_005240780.1	0.906491
cds-WP_025431843.1	1		cds-WP_025431843.1	1		cds-WP_005250003.1	0.790229		cds-WP_025431843.1	1		cds-WP_005568279.1	0.615076		cds-WP_005244108.1	0.511008		cds-WP_005240828.1	0.906486
cds-WP_025431845.1	1		cds-WP_025431845.1	1		cds-WP_005251387.1	0.79007		cds-WP_025431845.1	1		cds-WP_005571116.1	0.615076		cds-WP_005244449.1	0.510819		cds-WP_005248269.1	0.906415
cds-WP_025431855.1	1		cds-WP_025431855.1	1		cds-WP_005243976.1	0.789893		cds-WP_025431855.1	1		cds-WP_005573403.1	0.615076		cds-WP_025433186.1	0.510381		cds-WP_005240677.1	0.906385
cds-WP_025431860.1	1		cds-WP_025431860.1	1		cds-WP_025433134.1	0.789716		cds-WP_025431860.1	1		cds-WP_005573961.1	0.615076		cds-WP_005244240.1	0.510155		cds-WP_005242130.1	0.906384
cds-WP_025431862.1	1		cds-WP_025431862.1	1		cds-WP_005244880.1	0.789593		cds-WP_025431862.1	1		cds-WP_007300049.1	0.615076		cds-WP_005252671.1	0.510044		cds-WP_005241278.1	0.90636
cds-WP_025431864.1	1		cds-WP_025431864.1	1		cds-WP_005240977.1	0.789563		cds-WP_025431864.1	1		cds-WP_007300757.1	0.615076		cds-WP_005248168.1	0.51001		cds-WP_025432421.1	0.906213
cds-WP_025431867.1	1		cds-WP_025431867.1	1		cds-WP_005242940.1	0.789524		cds-WP_025431867.1	1		cds-WP_009473527.1	0.615076		cds-WP_005248628.1	0.509911		cds-WP_005244644.1	0.906104
cds-WP_025431877.1	1		cds-WP_025431877.1	1		cds-WP_005239878.1	0.789521		cds-WP_025431877.1	1		cds-WP_009474161.1	0.615076		cds-WP_005239397.1	0.509461		cds-WP_005247748.1	0.906024
cds-WP_025431881.1	1		cds-WP_025431881.1	1		cds-WP_005237868.1	0.789519		cds-WP_025431881.1	1		cds-WP_009474702.1	0.615076		cds-WP_264297283.1	0.509425		cds-WP_005248826.1	0.905992
cds-WP_025431890.1	1		cds-WP_025431890.1	1		cds-WP_005248040.1	0.789502		cds-WP_025431890.1	1		cds-WP_009474789.1	0.615076		cds-WP_005240899.1	0.509304		cds-WP_005250992.1	0.905889
cds-WP_025431892.1	1		cds-WP_025431892.1	1		cds-WP_005252788.1	0.789418		cds-WP_025431892.1	1		cds-WP_009477388.1	0.615076		cds-WP_005258596.1	0.509085		cds-WP_005252249.1	0.905875
cds-WP_025431896.1	1		cds-WP_025431896.1	1		cds-WP_005248899.1	0.788987		cds-WP_025431896.1	1		cds-WP_009478066.1	0.615076		cds-WP_226955818.1	0.509042		cds-WP_005244563.1	0.905838
cds-WP_025431903.1	1		cds-WP_025431903.1	1		cds-WP_025433420.1	0.788923		cds-WP_025431903.1	1		cds-WP_011593973.1	0.615076		cds-WP_264297285.1	0.508962		cds-WP_005244140.1	0.90577
cds-WP_025431907.1	1		cds-WP_025431907.1	1		cds-WP_005240587.1	0.788763		cds-WP_025431907.1	1		cds-WP_016880030.1	0.615076		cds-WP_025431724.1	0.508914		cds-WP_025433106.1	0.905766
cds-WP_025431910.1	1		cds-WP_025431910.1	1		cds-WP_226955771.1	0.788742		cds-WP_025431910.1	1		cds-WP_016883149.1	0.615076		cds-WP_025432565.1	0.508863		cds-WP_005244246.1	0.905642
cds-WP_025431912.1	1		cds-WP_025431912.1	1		cds-WP_005238286.1	0.78869		cds-WP_025431912.1	1		cds-WP_025431550.1	0.615076		cds-WP_005243149.1	0.508777		cds-WP_005244094.1	0.905634
cds-WP_025431913.1	1		cds-WP_025431913.1	1		cds-WP_005244615.1	0.788597		cds-WP_025431913.1	1		cds-WP_025431559.1	0.615076		cds-WP_005248630.1	0.508409		cds-WP_005251362.1	0.905527
cds-WP_025431914.1	1		cds-WP_025431914.1	1		cds-WP_005248751.1	0.788539		cds-WP_025431914.1	1		cds-WP_025431563.1	0.615076		cds-WP_007300518.1	0.507876		cds-WP_005250840.1	0.905463
cds-WP_025431917.1	1		cds-WP_025431917.1	1		cds-WP_005261100.1	0.788491		cds-WP_025431917.1	1		cds-WP_025431564.1	0.615076		cds-WP_005244598.1	0.50739		cds-WP_005240393.1	0.905344
cds-WP_025431918.1	1		cds-WP_025431918.1	1		cds-WP_025431725.1	0.788435		cds-WP_025431918.1	1		cds-WP_025431565.1	0.615076		cds-WP_005251668.1	0.507318		cds-WP_005248301.1	0.905299
cds-WP_025431921.1	1		cds-WP_025431921.1	1		cds-WP_005240477.1	0.788412		cds-WP_025431921.1	1		cds-WP_025431568.1	0.615076		cds-WP_005244403.1	0.507302		cds-WP_025433191.1	0.905277
cds-WP_025431923.1	1		cds-WP_025431923.1	1		cds-WP_025431877.1	0.788386		cds-WP_025431923.1	1		cds-WP_025431577.1	0.615076		cds-WP_005247382.1	0.507012		cds-WP_025432473.1	0.905271
cds-WP_025431924.1	1		cds-WP_025431924.1	1		cds-WP_005252400.1	0.788247		cds-WP_025431924.1	1		cds-WP_025431578.1	0.615076		cds-WP_005243040.1	0.506874		cds-WP_005238454.1	0.905247
cds-WP_025431926.1	1		cds-WP_025431926.1	1		cds-WP_025433233.1	0.788184		cds-WP_025431926.1	1		cds-WP_025431580.1	0.615076		cds-WP_005247398.1	0.506775		cds-K2Z90_RS02765	0.90517
cds-WP_025431934.1	1		cds-WP_025431934.1	1		cds-K2Z90_RS12130	0.788062		cds-WP_025431934.1	1		cds-WP_025431581.1	0.615076		cds-WP_005237901.1	0.506757		cds-WP_005240383.1	0.905118
cds-WP_025431939.1	1		cds-WP_025431939.1	1		cds-WP_005251663.1	0.788027		cds-WP_025431939.1	1		cds-WP_025431588.1	0.615076		cds-WP_005246520.1	0.506744		cds-WP_037182666.1	0.905108
cds-WP_025431940.1	1		cds-WP_025431940.1	1		cds-WP_005258512.1	0.788015		cds-WP_025431940.1	1		cds-WP_025431590.1	0.615076		cds-WP_005242402.1	0.506557		cds-WP_025432305.1	0.905107
cds-WP_025431941.1	1		cds-WP_025431941.1	1		cds-WP_025432258.1	0.787909		cds-WP_025431941.1	1		cds-WP_025431596.1	0.615076		cds-WP_005251827.1	0.506503		cds-WP_005250000.1	0.905042
cds-WP_025431942.1	1		cds-WP_025431942.1	1		cds-WP_005238613.1	0.787774		cds-WP_025431942.1	1		cds-WP_025431598.1	0.615076		cds-WP_005240777.1	0.50636		cds-WP_005240745.1	0.905028
cds-WP_025431945.1	1		cds-WP_025431945.1	1		cds-WP_005247896.1	0.787719		cds-WP_025431945.1	1		cds-WP_025431599.1	0.615076		cds-WP_037182576.1	0.506314		cds-WP_005252335.1	0.905006
cds-WP_025431947.1	1		cds-WP_025431947.1	1		cds-WP_025431702.1	0.787675		cds-WP_025431947.1	1		cds-WP_025431600.1	0.615076		cds-WP_025432583.1	0.506255		cds-WP_005241362.1	0.904957
cds-WP_025431951.1	1		cds-WP_025431951.1	1		cds-WP_005248502.1	0.787566		cds-WP_025431951.1	1		cds-WP_025431609.1	0.615076		cds-WP_025432531.1	0.506055		cds-WP_005244400.1	0.90495
cds-WP_025431952.1	1		cds-WP_025431952.1	1		cds-WP_005242398.1	0.787273		cds-WP_025431952.1	1		cds-WP_025431613.1	0.615076		cds-WP_005244509.1	0.505975		cds-WP_005244095.1	0.904872
cds-WP_025431960.1	1		cds-WP_025431960.1	1		cds-WP_025431667.1	0.787216		cds-WP_025431960.1	1		cds-WP_025431614.1	0.615076		cds-WP_025432000.1	0.505653		cds-WP_005238656.1	0.904857
cds-WP_025431961.1	1		cds-WP_025431961.1	1		cds-WP_025433520.1	0.787171		cds-WP_025431961.1	1		cds-WP_025431615.1	0.615076		cds-WP_025433618.1	0.505472		cds-WP_005244101.1	0.904843
cds-WP_025431964.1	1		cds-WP_025431964.1	1		cds-WP_005244346.1	0.787164		cds-WP_025431964.1	1		cds-WP_025431618.1	0.615076		cds-WP_025433204.1	0.505456		cds-WP_025432072.1	0.904807
cds-WP_025431970.1	1		cds-WP_025431970.1	1		cds-WP_025432826.1	0.787163		cds-WP_025431970.1	1		cds-WP_025431625.1	0.615076		cds-WP_005244958.1	0.505425		cds-WP_005248462.1	0.904756
cds-WP_025431971.1	1		cds-WP_025431971.1	1		cds-WP_005238985.1	0.787129		cds-WP_025431971.1	1		cds-WP_025431636.1	0.615076		cds-WP_005246357.1	0.505301		cds-WP_005247422.1	0.904753
cds-WP_025431983.1	1		cds-WP_025431983.1	1		cds-WP_005252024.1	0.787009		cds-WP_025431983.1	1		cds-WP_025431638.1	0.615076		cds-WP_005243767.1	0.505052		cds-WP_005244837.1	0.904667
cds-WP_025431984.1	1		cds-WP_025431984.1	1		cds-WP_005248574.1	0.786976		cds-WP_025431984.1	1		cds-WP_025431639.1	0.615076		cds-WP_005239548.1	0.504994		cds-WP_005238076.1	0.904656
cds-WP_025431994.1	1		cds-WP_025431994.1	1		cds-WP_005251724.1	0.786974		cds-WP_025431994.1	1		cds-WP_025431648.1	0.615076		cds-WP_005239657.1	0.504927		cds-WP_005237880.1	0.904645
cds-WP_025431997.1	1		cds-WP_025431997.1	1		cds-WP_025433065.1	0.78665		cds-WP_025431997.1	1		cds-WP_025431649.1	0.615076		cds-WP_025431890.1	0.504729		cds-WP_005240670.1	0.904564
cds-WP_025431999.1	1		cds-WP_025431999.1	1		cds-WP_025432794.1	0.786599		cds-WP_025431999.1	1		cds-WP_025431660.1	0.615076		cds-WP_025431738.1	0.504571		cds-WP_037181766.1	0.904548
cds-WP_025432000.1	1		cds-WP_025432000.1	1		cds-WP_005243975.1	0.786556		cds-WP_025432000.1	1		cds-WP_025431661.1	0.615076		cds-WP_025431914.1	0.504492		cds-WP_005242149.1	0.90449
cds-WP_025432001.1	1		cds-WP_025432001.1	1		cds-WP_025432827.1	0.786508		cds-WP_025432001.1	1		cds-WP_025431662.1	0.615076		cds-WP_005239995.1	0.504384		cds-WP_005249840.1	0.904458
cds-WP_025432003.1	1		cds-WP_025432003.1	1		cds-WP_005239614.1	0.786431		cds-WP_025432003.1	1		cds-WP_025431663.1	0.615076		cds-WP_025432025.1	0.504384		cds-WP_005240122.1	0.904423
cds-WP_025432007.1	1		cds-WP_025432007.1	1		cds-WP_005251659.1	0.786111		cds-WP_025432007.1	1		cds-WP_025431670.1	0.615076		cds-WP_025433349.1	0.504384		cds-WP_005247625.1	0.904382
cds-WP_025432034.1	1		cds-WP_025432034.1	1		cds-WP_231914249.1	0.786041		cds-WP_025432034.1	1		cds-WP_025431681.1	0.615076		cds-WP_025432909.1	0.504118		cds-WP_005244512.1	0.904243
cds-WP_025432063.1	1		cds-WP_025432063.1	1		cds-WP_005238367.1	0.785972		cds-WP_025432063.1	1		cds-WP_025431682.1	0.615076		cds-WP_005240969.1	0.504042		cds-WP_005251393.1	0.904171
cds-WP_025432064.1	1		cds-WP_025432064.1	1		cds-WP_005247522.1	0.785919		cds-WP_025432064.1	1		cds-WP_025431683.1	0.615076		cds-WP_025433010.1	0.503892		cds-WP_005240414.1	0.90417
cds-WP_025432069.1	1		cds-WP_025432069.1	1		cds-WP_005249205.1	0.785821		cds-WP_025432069.1	1		cds-WP_025431685.1	0.615076		cds-WP_005262216.1	0.503759		cds-WP_005252427.1	0.904147
cds-WP_025432084.1	1		cds-WP_025432084.1	1		cds-WP_005250033.1	0.785787		cds-WP_025432084.1	1		cds-WP_025431690.1	0.615076		cds-WP_005251825.1	0.503422		cds-WP_005240498.1	0.904134
cds-WP_025432089.1	1		cds-WP_025432089.1	1		cds-WP_005251070.1	0.785787		cds-WP_025432089.1	1		cds-WP_025431693.1	0.615076		cds-WP_025433293.1	0.503232		cds-WP_005247724.1	0.904109
cds-WP_025432090.1	1		cds-WP_025432090.1	1		cds-WP_005244686.1	0.785781		cds-WP_025432090.1	1		cds-WP_025431694.1	0.615076		cds-WP_005239244.1	0.503232		cds-WP_025431564.1	0.904014
cds-WP_025432093.1	1		cds-WP_025432093.1	1		cds-WP_025433007.1	0.785688		cds-WP_025432093.1	1		cds-WP_025431699.1	0.615076		cds-WP_025433130.1	0.503177		cds-WP_005243633.1	0.903874
cds-WP_025432101.1	1		cds-WP_025432101.1	1		cds-WP_005249625.1	0.785631		cds-WP_025432101.1	1		cds-WP_025431705.1	0.615076		cds-WP_005239121.1	0.503175		cds-WP_025431994.1	0.90386
cds-WP_025432102.1	1		cds-WP_025432102.1	1		cds-WP_005244040.1	0.785619		cds-WP_025432102.1	1		cds-WP_025431706.1	0.615076		cds-WP_005251547.1	0.503112		cds-WP_005252048.1	0.903793
cds-WP_025432105.1	1		cds-WP_025432105.1	1		cds-WP_025433505.1	0.785225		cds-WP_025432105.1	1		cds-WP_025431708.1	0.615076		cds-WP_005248152.1	0.503069		cds-WP_005239118.1	0.903716
cds-WP_025432110.1	1		cds-WP_025432110.1	1		cds-WP_005247455.1	0.785211		cds-WP_025432110.1	1		cds-WP_025431718.1	0.615076		cds-WP_005252897.1	0.503048		cds-WP_005246242.1	0.903355
cds-WP_025432111.1	1		cds-WP_025432111.1	1		cds-WP_005247990.1	0.785171		cds-WP_025432111.1	1		cds-WP_025431723.1	0.615076		cds-WP_005252157.1	0.502983		cds-WP_005237931.1	0.903336
cds-WP_025432119.1	1		cds-WP_025432119.1	1		cds-WP_005249618.1	0.784993		cds-WP_025432119.1	1		cds-WP_025431724.1	0.615076		cds-WP_005252907.1	0.502969		cds-WP_005251232.1	0.903335
cds-WP_025432121.1	1		cds-WP_025432121.1	1		cds-WP_037179365.1	0.784869		cds-WP_025432121.1	1		cds-WP_025431735.1	0.615076		cds-WP_005239936.1	0.502624		cds-WP_025433302.1	0.903268
cds-WP_025432128.1	1		cds-WP_025432128.1	1		cds-WP_005248810.1	0.784816		cds-WP_025432128.1	1		cds-WP_025431738.1	0.615076		cds-WP_005252936.1	0.502337		cds-WP_005250947.1	0.903229
cds-WP_025432130.1	1		cds-WP_025432130.1	1		cds-WP_005251013.1	0.784756		cds-WP_025432130.1	1		cds-WP_025431743.1	0.615076		cds-WP_025431695.1	0.502332		cds-WP_025432345.1	0.903184
cds-WP_025432132.1	1		cds-WP_025432132.1	1		cds-WP_005250790.1	0.784737		cds-WP_025432132.1	1		cds-WP_025431744.1	0.615076		cds-WP_005244575.1	0.502283		cds-WP_037182734.1	0.903067
cds-WP_025432142.1	1		cds-WP_025432142.1	1		cds-WP_025431941.1	0.784727		cds-WP_025432142.1	1		cds-WP_025431747.1	0.615076		cds-WP_005238823.1	0.502114		cds-WP_005248790.1	0.903007
cds-WP_025432145.1	1		cds-WP_025432145.1	1		cds-WP_005573288.1	0.784572		cds-WP_025432145.1	1		cds-WP_025431748.1	0.615076		cds-WP_005249978.1	0.501984		cds-WP_005251080.1	0.902948
cds-WP_025432149.1	1		cds-WP_025432149.1	1		cds-WP_005252917.1	0.784543		cds-WP_025432149.1	1		cds-WP_025431749.1	0.615076		cds-WP_025432986.1	0.501723		cds-WP_005252536.1	0.902941
cds-WP_025432151.1	1		cds-WP_025432151.1	1		cds-WP_005242980.1	0.784537		cds-WP_025432151.1	1		cds-WP_025431755.1	0.615076		cds-WP_005238803.1	0.501705		cds-WP_005250143.1	0.902856
cds-WP_025432152.1	1		cds-WP_025432152.1	1		cds-WP_005248191.1	0.784465		cds-WP_025432152.1	1		cds-WP_025431759.1	0.615076		cds-WP_005241367.1	0.501405		cds-WP_005240591.1	0.902792
cds-WP_025432153.1	1		cds-WP_025432153.1	1		cds-WP_025431665.1	0.784266		cds-WP_025432153.1	1		cds-WP_025431767.1	0.615076		cds-WP_025432305.1	0.501178		cds-WP_005252680.1	0.902723
cds-WP_025432156.1	1		cds-WP_025432156.1	1		cds-WP_005252414.1	0.784242		cds-WP_025432156.1	1		cds-WP_025431772.1	0.615076		cds-WP_025432216.1	0.501068		cds-WP_005251495.1	0.902707
cds-WP_025432158.1	1		cds-WP_025432158.1	1		cds-WP_037180020.1	0.784036		cds-WP_025432158.1	1		cds-WP_025431779.1	0.615076		cds-WP_005240744.1	0.501054		cds-WP_005251421.1	0.902699
cds-WP_025432159.1	1		cds-WP_025432159.1	1		cds-WP_005252898.1	0.783948		cds-WP_025432159.1	1		cds-WP_025431790.1	0.615076		cds-WP_005240427.1	0.500965		cds-WP_025432450.1	0.902574
cds-WP_025432162.1	1		cds-WP_025432162.1	1		cds-WP_005238746.1	0.78393		cds-WP_025432162.1	1		cds-WP_025431792.1	0.615076		cds-WP_226955733.1	0.500879		cds-WP_005247757.1	0.902506
cds-WP_025432163.1	1		cds-WP_025432163.1	1		cds-WP_005241723.1	0.78382		cds-WP_025432163.1	1		cds-WP_025431800.1	0.615076		cds-WP_005245117.1	0.500399		cds-WP_025431607.1	0.902387
cds-WP_025432164.1	1		cds-WP_025432164.1	1		cds-WP_005241654.1	0.783599		cds-WP_025432164.1	1		cds-WP_025431803.1	0.615076		cds-WP_025432195.1	0.500325		cds-WP_005251559.1	0.902381
cds-WP_025432165.1	1		cds-WP_025432165.1	1		cds-WP_005238074.1	0.783563		cds-WP_025432165.1	1		cds-WP_025431804.1	0.615076		cds-WP_005243144.1	0.500148		cds-WP_025432262.1	0.902336
cds-WP_025432169.1	1		cds-WP_025432169.1	1		cds-WP_043943783.1	0.78351		cds-WP_025432169.1	1		cds-WP_025431816.1	0.615076		cds-WP_005244976.1	0.500129		cds-WP_005238506.1	0.902249
cds-WP_025432172.1	1		cds-WP_025432172.1	1		cds-WP_005244836.1	0.783479		cds-WP_025432172.1	1		cds-WP_025431817.1	0.615076		cds-WP_005248048.1	0.500074		cds-WP_005237894.1	0.902085
cds-WP_025432173.1	1		cds-WP_025432173.1	1		cds-WP_226955536.1	0.783181		cds-WP_025432173.1	1		cds-WP_025431822.1	0.615076		cds-WP_005238615.1	0.499988		cds-WP_005239873.1	0.902075
cds-WP_025432189.1	1		cds-WP_025432189.1	1		cds-WP_005241417.1	0.782981		cds-WP_025432189.1	1		cds-WP_025431824.1	0.615076		cds-WP_226955748.1	0.499953		cds-WP_005249484.1	0.902027
cds-WP_025432191.1	1		cds-WP_025432191.1	1		cds-WP_005244387.1	0.782551		cds-WP_025432191.1	1		cds-WP_025431825.1	0.615076		cds-WP_005244060.1	0.499854		cds-WP_005251513.1	0.901891
cds-WP_025432192.1	1		cds-WP_025432192.1	1		cds-WP_005239291.1	0.782521		cds-WP_025432192.1	1		cds-WP_025431832.1	0.615076		cds-WP_005247983.1	0.499781		cds-WP_005241837.1	0.901845
cds-WP_025432195.1	1		cds-WP_025432195.1	1		cds-WP_005251518.1	0.782443		cds-WP_025432195.1	1		cds-WP_025431835.1	0.615076		cds-WP_025431746.1	0.499735		cds-WP_005240626.1	0.901821
cds-WP_025432197.1	1		cds-WP_025432197.1	1		cds-WP_005251153.1	0.782399		cds-WP_025432197.1	1		cds-WP_025431836.1	0.615076		cds-WP_025432627.1	0.499653		cds-WP_025432116.1	0.901806
cds-WP_025432202.1	1		cds-WP_025432202.1	1		cds-WP_005251673.1	0.782196		cds-WP_025432202.1	1		cds-WP_025431858.1	0.615076		cds-WP_025433447.1	0.499625		cds-WP_005248778.1	0.901805
cds-WP_025432206.1	1		cds-WP_025432206.1	1		cds-WP_005248717.1	0.782094		cds-WP_025432206.1	1		cds-WP_025431860.1	0.615076		cds-WP_005249979.1	0.499615		cds-WP_005246348.1	0.901612
cds-WP_025432207.1	1		cds-WP_025432207.1	1		cds-WP_025433213.1	0.781987		cds-WP_025432207.1	1		cds-WP_025431862.1	0.615076		cds-WP_005248843.1	0.49961		cds-WP_005248835.1	0.901607
cds-WP_025432210.1	1		cds-WP_025432210.1	1		cds-WP_025432151.1	0.781784		cds-WP_025432210.1	1		cds-WP_025431867.1	0.615076		cds-WP_025433235.1	0.499527		cds-WP_005239500.1	0.901532
cds-WP_025432213.1	1		cds-WP_025432213.1	1		cds-WP_025432853.1	0.781661		cds-WP_025432213.1	1		cds-WP_025431869.1	0.615076		cds-WP_025432189.1	0.499496		cds-WP_005250370.1	0.90136
cds-WP_025432215.1	1		cds-WP_025432215.1	1		cds-WP_005238528.1	0.781414		cds-WP_025432215.1	1		cds-WP_025431871.1	0.615076		cds-WP_005248348.1	0.49946		cds-WP_005240662.1	0.901353
cds-WP_025432217.1	1		cds-WP_025432217.1	1		cds-WP_005244827.1	0.781357		cds-WP_025432217.1	1		cds-WP_025431876.1	0.615076		cds-WP_009474135.1	0.499407		cds-WP_005249134.1	0.901338
cds-WP_025432222.1	1		cds-WP_025432222.1	1		cds-WP_005250985.1	0.781294		cds-WP_025432222.1	1		cds-WP_025431878.1	0.615076		cds-WP_226955683.1	0.499344		cds-WP_005248860.1	0.901289
cds-WP_025432223.1	1		cds-WP_025432223.1	1		cds-WP_025431855.1	0.781245		cds-WP_025432223.1	1		cds-WP_025431887.1	0.615076		cds-WP_005239418.1	0.498978		cds-WP_025431571.1	0.901188
cds-WP_025432224.1	1		cds-WP_025432224.1	1		cds-WP_005247768.1	0.781238		cds-WP_025432224.1	1		cds-WP_025431889.1	0.615076		cds-WP_005250380.1	0.498885		cds-WP_025432225.1	0.901161
cds-WP_025432227.1	1		cds-WP_025432227.1	1		cds-WP_005238844.1	0.781166		cds-WP_025432227.1	1		cds-WP_025431890.1	0.615076		cds-WP_025431590.1	0.498841		cds-WP_005251302.1	0.901151
cds-WP_025432232.1	1		cds-WP_025432232.1	1		cds-WP_037182564.1	0.781129		cds-WP_025432232.1	1		cds-WP_025431903.1	0.615076		cds-WP_025432335.1	0.498688		cds-WP_025433139.1	0.901145
cds-WP_025432236.1	1		cds-WP_025432236.1	1		cds-WP_005252536.1	0.780869		cds-WP_025432236.1	1		cds-WP_025431912.1	0.615076		cds-WP_005237933.1	0.498485		cds-WP_005251229.1	0.901091
cds-WP_025432237.1	1		cds-WP_025432237.1	1		cds-WP_025431885.1	0.780869		cds-WP_025432237.1	1		cds-WP_025431915.1	0.615076		cds-WP_025433336.1	0.498305		cds-WP_025431977.1	0.901074
cds-WP_025432247.1	1		cds-WP_025432247.1	1		cds-WP_025433184.1	0.780869		cds-WP_025432247.1	1		cds-WP_025431921.1	0.615076		cds-WP_005248517.1	0.498162		cds-WP_005249981.1	0.901002
cds-WP_025432251.1	1		cds-WP_025432251.1	1		cds-WP_005246309.1	0.78084		cds-WP_025432251.1	1		cds-WP_025431934.1	0.615076		cds-WP_005240602.1	0.498093		cds-WP_025432118.1	0.900932
cds-WP_025432254.1	1		cds-WP_025432254.1	1		cds-WP_005249040.1	0.780785		cds-WP_025432254.1	1		cds-WP_025431940.1	0.615076		cds-WP_005248812.1	0.498082		cds-WP_005252902.1	0.900907
cds-WP_025432258.1	1		cds-WP_025432258.1	1		cds-WP_005244834.1	0.780738		cds-WP_025432258.1	1		cds-WP_025431942.1	0.615076		cds-WP_025432098.1	0.498046		cds-WP_005250049.1	0.900891
cds-WP_025432260.1	1		cds-WP_025432260.1	1		cds-WP_037182531.1	0.780712		cds-WP_025432260.1	1		cds-WP_025431944.1	0.615076		cds-WP_005240785.1	0.498		cds-WP_005243826.1	0.900839
cds-WP_025432261.1	1		cds-WP_025432261.1	1		cds-WP_005251677.1	0.780693		cds-WP_025432261.1	1		cds-WP_025431945.1	0.615076		cds-WP_025433089.1	0.497977		cds-WP_005242958.1	0.900645
cds-WP_025432262.1	1		cds-WP_025432262.1	1		cds-WP_025432348.1	0.78065		cds-WP_025432262.1	1		cds-WP_025431946.1	0.615076		cds-WP_005246333.1	0.497929		cds-WP_005238306.1	0.900616
cds-WP_025432263.1	1		cds-WP_025432263.1	1		cds-WP_025432102.1	0.780644		cds-WP_025432263.1	1		cds-WP_025431947.1	0.615076		cds-WP_005252061.1	0.497849		cds-WP_226955716.1	0.900588
cds-WP_025432268.1	1		cds-WP_025432268.1	1		cds-WP_037179001.1	0.780631		cds-WP_025432268.1	1		cds-WP_025431949.1	0.615076		cds-WP_005244825.1	0.497774		cds-WP_005244804.1	0.900536
cds-WP_025432281.1	1		cds-WP_025432281.1	1		cds-WP_003418601.1	0.780605		cds-WP_025432281.1	1		cds-WP_025431968.1	0.615076		cds-WP_005244417.1	0.497658		cds-WP_005237960.1	0.900379
cds-WP_025432285.1	1		cds-WP_025432285.1	1		cds-WP_005249483.1	0.780476		cds-WP_025432285.1	1		cds-WP_025431970.1	0.615076		cds-WP_025432087.1	0.497527		cds-WP_005252512.1	0.900324
cds-WP_025432289.1	1		cds-WP_025432289.1	1		cds-WP_005246337.1	0.780374		cds-WP_025432289.1	1		cds-WP_025431976.1	0.615076		cds-WP_009480519.1	0.497469		cds-WP_025432972.1	0.900254
cds-WP_025432290.1	1		cds-WP_025432290.1	1		cds-WP_005252376.1	0.780332		cds-WP_025432290.1	1		cds-WP_025431983.1	0.615076		cds-WP_005251848.1	0.49738		cds-WP_005250023.1	0.899872
cds-WP_025432293.1	1		cds-WP_025432293.1	1		cds-WP_025432164.1	0.780208		cds-WP_025432293.1	1		cds-WP_025431984.1	0.615076		cds-WP_025433826.1	0.497151		cds-WP_025433150.1	0.899845
cds-WP_025432295.1	1		cds-WP_025432295.1	1		cds-WP_005247827.1	0.780043		cds-WP_025432295.1	1		cds-WP_025431986.1	0.615076		cds-WP_005242974.1	0.497072		cds-WP_005239314.1	0.899783
cds-WP_025432296.1	1		cds-WP_025432296.1	1		cds-WP_005239230.1	0.779944		cds-WP_025432296.1	1		cds-WP_025431990.1	0.615076		cds-WP_005239683.1	0.497044		cds-WP_025431767.1	0.899781
cds-WP_025432298.1	1		cds-WP_025432298.1	1		cds-WP_005244486.1	0.779664		cds-WP_025432298.1	1		cds-WP_025431993.1	0.615076		cds-WP_009474616.1	0.497043		cds-WP_043943641.1	0.899777
cds-WP_025432300.1	1		cds-WP_025432300.1	1		cds-WP_005252339.1	0.779602		cds-WP_025432300.1	1		cds-WP_025431994.1	0.615076		cds-WP_005247775.1	0.496896		cds-WP_005246337.1	0.899738
cds-WP_025432305.1	1		cds-WP_025432305.1	1		cds-WP_005237870.1	0.779398		cds-WP_025432305.1	1		cds-WP_025431999.1	0.615076		cds-WP_005248914.1	0.496778		cds-WP_025432386.1	0.899734
cds-WP_025432307.1	1		cds-WP_025432307.1	1		cds-WP_005244012.1	0.779233		cds-WP_025432307.1	1		cds-WP_025432000.1	0.615076		cds-WP_005239312.1	0.496337		cds-WP_025433293.1	0.899717
cds-WP_025432308.1	1		cds-WP_025432308.1	1		cds-WP_005246074.1	0.779115		cds-WP_025432308.1	1		cds-WP_025432003.1	0.615076		cds-WP_005250559.1	0.496336		cds-WP_005239852.1	0.89969
cds-WP_025432310.1	1		cds-WP_025432310.1	1		cds-WP_005573403.1	0.779114		cds-WP_025432310.1	1		cds-WP_025432006.1	0.615076		cds-WP_005250565.1	0.496313		cds-WP_005241821.1	0.89966
cds-WP_025432314.1	1		cds-WP_025432314.1	1		cds-WP_025431952.1	0.778991		cds-WP_025432314.1	1		cds-WP_025432035.1	0.615076		cds-WP_005237956.1	0.496313		cds-WP_005239823.1	0.899619
cds-WP_025432315.1	1		cds-WP_025432315.1	1		cds-WP_005242495.1	0.778868		cds-WP_025432315.1	1		cds-WP_025432062.1	0.615076		cds-WP_005239618.1	0.496313		cds-WP_005240490.1	0.899526
cds-WP_025432316.1	1		cds-WP_025432316.1	1		cds-WP_005251956.1	0.778685		cds-WP_025432316.1	1		cds-WP_025432063.1	0.615076		cds-WP_005241050.1	0.496313		cds-WP_005248899.1	0.899457
cds-WP_025432328.1	1		cds-WP_025432328.1	1		cds-WP_005243623.1	0.778603		cds-WP_025432328.1	1		cds-WP_025432064.1	0.615076		cds-WP_005242447.1	0.496313		cds-WP_005240376.1	0.899447
cds-WP_025432335.1	1		cds-WP_025432335.1	1		cds-WP_005239660.1	0.778601		cds-WP_025432335.1	1		cds-WP_025432065.1	0.615076		cds-WP_005242737.1	0.496313		cds-WP_005238269.1	0.899312
cds-WP_025432336.1	1		cds-WP_025432336.1	1		cds-WP_025431605.1	0.778552		cds-WP_025432336.1	1		cds-WP_025432072.1	0.615076		cds-WP_005242826.1	0.496313		cds-WP_005243162.1	0.899223
cds-WP_025432337.1	1		cds-WP_025432337.1	1		cds-WP_025431548.1	0.778525		cds-WP_025432337.1	1		cds-WP_025432080.1	0.615076		cds-WP_005242897.1	0.496313		cds-WP_226955541.1	0.899221
cds-WP_025432341.1	1		cds-WP_025432341.1	1		cds-WP_025432843.1	0.778415		cds-WP_025432341.1	1		cds-WP_025432083.1	0.615076		cds-WP_005244268.1	0.496313		cds-WP_005252285.1	0.899195
cds-WP_025432344.1	1		cds-WP_025432344.1	1		cds-WP_005249289.1	0.778407		cds-WP_025432344.1	1		cds-WP_025432090.1	0.615076		cds-WP_005245238.1	0.496313		cds-WP_005243040.1	0.899106
cds-WP_025432346.1	1		cds-WP_025432346.1	1		cds-WP_025433178.1	0.778056		cds-WP_025432346.1	1		cds-WP_025432100.1	0.615076		cds-WP_005246606.1	0.496313		cds-WP_005252425.1	0.899054
cds-WP_025432348.1	1		cds-WP_025432348.1	1		cds-WP_025433423.1	0.778032		cds-WP_025432348.1	1		cds-WP_025432101.1	0.615076		cds-WP_005248239.1	0.496313		cds-WP_005246218.1	0.899011
cds-WP_025432351.1	1		cds-WP_025432351.1	1		cds-WP_005238794.1	0.778		cds-WP_025432351.1	1		cds-WP_025432113.1	0.615076		cds-WP_005249722.1	0.496313		cds-WP_025432794.1	0.898941
cds-WP_025432360.1	1		cds-WP_025432360.1	1		cds-WP_005238743.1	0.777996		cds-WP_025432360.1	1		cds-WP_025432118.1	0.615076		cds-WP_005250422.1	0.496313		cds-WP_005248195.1	0.898865
cds-WP_025432363.1	1		cds-WP_025432363.1	1		cds-WP_005241881.1	0.777969		cds-WP_025432363.1	1		cds-WP_025432121.1	0.615076		cds-WP_005250520.1	0.496313		cds-WP_037179844.1	0.898455
cds-WP_025432368.1	1		cds-WP_025432368.1	1		cds-WP_005252203.1	0.77747		cds-WP_025432368.1	1		cds-WP_025432140.1	0.615076		cds-WP_005251541.1	0.496313		cds-WP_005244537.1	0.898441
cds-WP_025432370.1	1		cds-WP_025432370.1	1		cds-WP_037179138.1	0.777385		cds-WP_025432370.1	1		cds-WP_025432144.1	0.615076		cds-WP_005252219.1	0.496313		cds-WP_005247490.1	0.898348
cds-WP_025432372.1	1		cds-WP_025432372.1	1		cds-WP_005251466.1	0.777379		cds-WP_025432372.1	1		cds-WP_025432145.1	0.615076		cds-WP_005252763.1	0.496313		cds-WP_005248484.1	0.898204
cds-WP_025432373.1	1		cds-WP_025432373.1	1		cds-WP_005240964.1	0.777328		cds-WP_025432373.1	1		cds-WP_025432149.1	0.615076		cds-WP_025432125.1	0.496313		cds-WP_005240050.1	0.898155
cds-WP_025432376.1	1		cds-WP_025432376.1	1		cds-WP_005244733.1	0.777135		cds-WP_025432376.1	1		cds-WP_025432150.1	0.615076		cds-WP_025433307.1	0.496313		cds-WP_226955510.1	0.898001
cds-WP_025432385.1	1		cds-WP_025432385.1	1		cds-WP_005252065.1	0.777097		cds-WP_025432385.1	1		cds-WP_025432151.1	0.615076		cds-WP_143767463.1	0.496313		cds-WP_005248918.1	0.898
cds-WP_025432391.1	1		cds-WP_025432391.1	1		cds-WP_005238874.1	0.776779		cds-WP_025432391.1	1		cds-WP_025432153.1	0.615076		cds-WP_179443303.1	0.496313		cds-WP_005241865.1	0.897976
cds-WP_025432392.1	1		cds-WP_025432392.1	1		cds-WP_005247527.1	0.776675		cds-WP_025432392.1	1		cds-WP_025432154.1	0.615076		cds-WP_226955815.1	0.496313		cds-WP_005251264.1	0.897939
cds-WP_025432393.1	1		cds-WP_025432393.1	1		cds-WP_005249868.1	0.776623		cds-WP_025432393.1	1		cds-WP_025432156.1	0.615076		cds-WP_264297256.1	0.496313		cds-WP_005238690.1	0.897851
cds-WP_025432394.1	1		cds-WP_025432394.1	1		cds-WP_025431617.1	0.776611		cds-WP_025432394.1	1		cds-WP_025432158.1	0.615076		cds-WP_264297298.1	0.496313		cds-WP_005238771.1	0.897832
cds-WP_025432395.1	1		cds-WP_025432395.1	1		cds-WP_005250001.1	0.776574		cds-WP_025432395.1	1		cds-WP_025432159.1	0.615076		cds-WP_025431720.1	0.496225		cds-WP_005252247.1	0.897778
cds-WP_025432398.1	1		cds-WP_025432398.1	1		cds-WP_005244985.1	0.776467		cds-WP_025432398.1	1		cds-WP_025432163.1	0.615076		cds-WP_005251758.1	0.496123		cds-WP_005244599.1	0.897653
cds-WP_025432405.1	1		cds-WP_025432405.1	1		cds-WP_025433203.1	0.775967		cds-WP_025432405.1	1		cds-WP_025432165.1	0.615076		cds-WP_005240302.1	0.495919		cds-WP_005247438.1	0.897626
cds-WP_025432406.1	1		cds-WP_025432406.1	1		cds-WP_005260882.1	0.775941		cds-WP_025432406.1	1		cds-WP_025432189.1	0.615076		cds-WP_005246101.1	0.495901		cds-WP_005243739.1	0.897603
cds-WP_025432407.1	1		cds-WP_025432407.1	1		cds-WP_025432531.1	0.775899		cds-WP_025432407.1	1		cds-WP_025432191.1	0.615076		cds-WP_005248256.1	0.49587		cds-WP_025432218.1	0.897602
cds-WP_025432409.1	1		cds-WP_025432409.1	1		cds-WP_005238482.1	0.775688		cds-WP_025432409.1	1		cds-WP_025432192.1	0.615076		cds-WP_025433094.1	0.495692		cds-WP_025432063.1	0.897597
cds-WP_025432410.1	1		cds-WP_025432410.1	1		cds-WP_005252722.1	0.775607		cds-WP_025432410.1	1		cds-WP_025432197.1	0.615076		cds-WP_005247472.1	0.495686		cds-WP_025433015.1	0.897585
cds-WP_025432411.1	1		cds-WP_025432411.1	1		cds-WP_025431745.1	0.775606		cds-WP_025432411.1	1		cds-WP_025432198.1	0.615076		cds-WP_005244429.1	0.495617		cds-WP_005242132.1	0.897495
cds-WP_025432412.1	1		cds-WP_025432412.1	1		cds-WP_005247640.1	0.775535		cds-WP_025432412.1	1		cds-WP_025432206.1	0.615076		cds-WP_005247574.1	0.495597		cds-WP_005250037.1	0.897495
cds-WP_025432418.1	1		cds-WP_025432418.1	1		cds-WP_005242384.1	0.775419		cds-WP_025432418.1	1		cds-WP_025432212.1	0.615076		cds-WP_005248578.1	0.495469		cds-WP_005248702.1	0.897495
cds-WP_025432421.1	1		cds-WP_025432421.1	1		cds-WP_226955709.1	0.775404		cds-WP_025432421.1	1		cds-WP_025432218.1	0.615076		cds-WP_005240632.1	0.495401		cds-WP_005243473.1	0.897311
cds-WP_025432425.1	1		cds-WP_025432425.1	1		cds-WP_005238398.1	0.774906		cds-WP_025432425.1	1		cds-WP_025432223.1	0.615076		cds-WP_025433326.1	0.495089		cds-WP_005244846.1	0.897252
cds-WP_025432426.1	1		cds-WP_025432426.1	1		cds-WP_005251916.1	0.774873		cds-WP_025432426.1	1		cds-WP_025432235.1	0.615076		cds-WP_005251971.1	0.495017		cds-WP_005239346.1	0.897246
cds-WP_025432461.1	1		cds-WP_025432461.1	1		cds-WP_037179238.1	0.774724		cds-WP_025432461.1	1		cds-WP_025432236.1	0.615076		cds-WP_226955688.1	0.494982		cds-WP_005250072.1	0.897212
cds-WP_025432473.1	1		cds-WP_025432473.1	1		cds-WP_005240167.1	0.774505		cds-WP_025432473.1	1		cds-WP_025432237.1	0.615076		cds-WP_005243696.1	0.494971		cds-WP_005250050.1	0.897148
cds-WP_025432513.1	1		cds-WP_025432513.1	1		cds-WP_005249629.1	0.77436		cds-WP_025432513.1	1		cds-WP_025432246.1	0.615076		cds-WP_005238125.1	0.494734		cds-WP_005254252.1	0.897035
cds-WP_025432516.1	1		cds-WP_025432516.1	1		cds-WP_005248866.1	0.77435		cds-WP_025432516.1	1		cds-WP_025432255.1	0.615076		cds-WP_005574864.1	0.49469		cds-WP_005241656.1	0.89687
cds-WP_025432519.1	1		cds-WP_025432519.1	1		cds-WP_005239602.1	0.774257		cds-WP_025432519.1	1		cds-WP_025432257.1	0.615076		cds-WP_005238892.1	0.494424		cds-WP_005248692.1	0.896592
cds-WP_025432521.1	1		cds-WP_025432521.1	1		cds-WP_005247923.1	0.774147		cds-WP_025432521.1	1		cds-WP_025432260.1	0.615076		cds-WP_005251799.1	0.494418		cds-WP_005240787.1	0.896488
cds-WP_025432524.1	1		cds-WP_025432524.1	1		cds-WP_025433631.1	0.774139		cds-WP_025432524.1	1		cds-WP_025432262.1	0.615076		cds-WP_005244607.1	0.494375		cds-WP_005252136.1	0.896453
cds-WP_025432525.1	1		cds-WP_025432525.1	1		cds-WP_005250843.1	0.773909		cds-WP_025432525.1	1		cds-WP_025432263.1	0.615076		cds-WP_025432873.1	0.4942		cds-WP_005240598.1	0.896451
cds-WP_025432527.1	1		cds-WP_025432527.1	1		cds-WP_226955662.1	0.773832		cds-WP_025432527.1	1		cds-WP_025432270.1	0.615076		cds-WP_005251278.1	0.494127		cds-WP_005244999.1	0.89642
cds-WP_025432531.1	1		cds-WP_025432531.1	1		cds-WP_005249286.1	0.773784		cds-WP_025432531.1	1		cds-WP_025432285.1	0.615076		cds-WP_005241425.1	0.494107		cds-WP_005244014.1	0.896325
cds-WP_025432533.1	1		cds-WP_025432533.1	1		cds-WP_025432360.1	0.773443		cds-WP_025432533.1	1		cds-WP_025432288.1	0.615076		cds-WP_005240812.1	0.493715		cds-WP_005247765.1	0.896193
cds-WP_025432542.1	1		cds-WP_025432542.1	1		cds-WP_005248852.1	0.77323		cds-WP_025432542.1	1		cds-WP_025432293.1	0.615076		cds-WP_005251902.1	0.493678		cds-WP_005248446.1	0.895972
cds-WP_025432544.1	1		cds-WP_025432544.1	1		cds-WP_005241026.1	0.773117		cds-WP_025432544.1	1		cds-WP_025432298.1	0.615076		cds-WP_005251673.1	0.49358		cds-WP_005252154.1	0.895841
cds-WP_025432545.1	1		cds-WP_025432545.1	1		cds-WP_025432142.1	0.773105		cds-WP_025432545.1	1		cds-WP_025432300.1	0.615076		cds-WP_005247843.1	0.493529		cds-WP_005240106.1	0.895722
cds-WP_025432546.1	1		cds-WP_025432546.1	1		cds-WP_005244887.1	0.773069		cds-WP_025432546.1	1		cds-WP_025432307.1	0.615076		cds-K2Z90_RS21630	0.493263		cds-WP_005248057.1	0.895672
cds-WP_025432547.1	1		cds-WP_025432547.1	1		cds-WP_005240737.1	0.773062		cds-WP_025432547.1	1		cds-WP_025432308.1	0.615076		cds-WP_005247785.1	0.493177		cds-WP_007299149.1	0.895666
cds-WP_025432554.1	1		cds-WP_025432554.1	1		cds-WP_025433634.1	0.772977		cds-WP_025432554.1	1		cds-WP_025432331.1	0.615076		cds-WP_025432535.1	0.493012		cds-WP_005247575.1	0.895662
cds-WP_025432555.1	1		cds-WP_025432555.1	1		cds-WP_005248807.1	0.772946		cds-WP_025432555.1	1		cds-WP_025432337.1	0.615076		cds-WP_005251641.1	0.492932		cds-WP_005251573.1	0.895545
cds-WP_025432557.1	1		cds-WP_025432557.1	1		cds-WP_025433393.1	0.772761		cds-WP_025432557.1	1		cds-WP_025432341.1	0.615076		cds-WP_005257351.1	0.492852		cds-WP_005251761.1	0.89543
cds-WP_025432560.1	1		cds-WP_025432560.1	1		cds-WP_025432836.1	0.772614		cds-WP_025432560.1	1		cds-WP_025432346.1	0.615076		cds-WP_005252133.1	0.492711		cds-WP_005249216.1	0.895414
cds-WP_025432565.1	1		cds-WP_025432565.1	1		cds-WP_005251997.1	0.772539		cds-WP_025432565.1	1		cds-WP_025432347.1	0.615076		cds-WP_005247825.1	0.492635		cds-WP_005245022.1	0.895393
cds-WP_025432567.1	1		cds-WP_025432567.1	1		cds-WP_025431843.1	0.772486		cds-WP_025432567.1	1		cds-WP_025432353.1	0.615076		cds-WP_005238847.1	0.492409		cds-WP_025432790.1	0.895367
cds-WP_025432570.1	1		cds-WP_025432570.1	1		cds-WP_037182503.1	0.772428		cds-WP_025432570.1	1		cds-WP_025432366.1	0.615076		cds-WP_005238721.1	0.492233		cds-WP_025433184.1	0.895338
cds-WP_025432573.1	1		cds-WP_025432573.1	1		cds-WP_003402602.1	0.772119		cds-WP_025432573.1	1		cds-WP_025432371.1	0.615076		cds-WP_005243141.1	0.492084		cds-WP_005259666.1	0.895227
cds-WP_025432581.1	1		cds-WP_025432581.1	1		cds-WP_025432740.1	0.772049		cds-WP_025432581.1	1		cds-WP_025432376.1	0.615076		cds-WP_005240338.1	0.491892		cds-WP_005240272.1	0.895219
cds-WP_025432597.1	1		cds-WP_025432597.1	1		cds-WP_005244557.1	0.771928		cds-WP_025432597.1	1		cds-WP_025432381.1	0.615076		cds-WP_005244524.1	0.491853		cds-WP_025432165.1	0.895139
cds-WP_025432598.1	1		cds-WP_025432598.1	1		cds-WP_005250148.1	0.771841		cds-WP_025432598.1	1		cds-WP_025432386.1	0.615076		cds-WP_005249317.1	0.491404		cds-WP_005238845.1	0.895
cds-WP_025432600.1	1		cds-WP_025432600.1	1		cds-WP_005251006.1	0.771764		cds-WP_025432600.1	1		cds-WP_025432388.1	0.615076		cds-WP_005263616.1	0.491362		cds-WP_005248827.1	0.894978
cds-WP_025432602.1	1		cds-WP_025432602.1	1		cds-WP_025432370.1	0.771746		cds-WP_025432602.1	1		cds-WP_025432390.1	0.615076		cds-WP_043943921.1	0.491239		cds-WP_005251248.1	0.894923
cds-WP_025432607.1	1		cds-WP_025432607.1	1		cds-WP_005251920.1	0.771607		cds-WP_025432607.1	1		cds-WP_025432391.1	0.615076		cds-WP_005249033.1	0.491053		cds-WP_025433423.1	0.894864
cds-WP_025432621.1	1		cds-WP_025432621.1	1		cds-WP_005245117.1	0.771389		cds-WP_025432621.1	1		cds-WP_025432392.1	0.615076		cds-WP_005248977.1	0.490953		cds-WP_005251056.1	0.894751
cds-WP_025432626.1	1		cds-WP_025432626.1	1		cds-WP_005252574.1	0.771154		cds-WP_025432626.1	1		cds-WP_025432395.1	0.615076		cds-WP_025431984.1	0.490385		cds-WP_025432626.1	0.894496
cds-WP_025432642.1	1		cds-WP_025432642.1	1		cds-WP_025432426.1	0.771069		cds-WP_025432642.1	1		cds-WP_025432399.1	0.615076		cds-WP_025432573.1	0.490378		cds-WP_005240583.1	0.894406
cds-WP_025432656.1	1		cds-WP_025432656.1	1		cds-WP_005252447.1	0.771035		cds-WP_025432656.1	1		cds-WP_025432402.1	0.615076		cds-WP_005246369.1	0.490281		cds-K2Z90_RS12130	0.894404
cds-WP_025432671.1	1		cds-WP_025432671.1	1		cds-WP_025433123.1	0.770995		cds-WP_025432671.1	1		cds-WP_025432403.1	0.615076		cds-WP_005238939.1	0.489913		cds-K2Z90_RS12205	0.89432
cds-WP_025432674.1	1		cds-WP_025432674.1	1		cds-K2Z90_RS14235	0.770991		cds-WP_025432674.1	1		cds-WP_025432405.1	0.615076		cds-WP_005247511.1	0.489903		cds-WP_005243713.1	0.894276
cds-WP_025432713.1	1		cds-WP_025432713.1	1		cds-WP_005250147.1	0.770937		cds-WP_025432713.1	1		cds-WP_025432411.1	0.615076		cds-WP_005250107.1	0.489861		cds-WP_005242791.1	0.894162
cds-WP_025432789.1	1		cds-WP_025432789.1	1		cds-WP_005243736.1	0.77088		cds-WP_025432789.1	1		cds-WP_025432418.1	0.615076		cds-WP_005252390.1	0.489838		cds-WP_025433324.1	0.894101
cds-WP_025432794.1	1		cds-WP_025432794.1	1		cds-WP_005251135.1	0.77084		cds-WP_025432794.1	1		cds-WP_025432428.1	0.615076		cds-WP_025431599.1	0.48966		cds-WP_005250032.1	0.894097
cds-WP_025432813.1	1		cds-WP_025432813.1	1		cds-WP_005252249.1	0.770827		cds-WP_025432813.1	1		cds-WP_025432469.1	0.615076		cds-WP_025432090.1	0.489375		cds-WP_025432713.1	0.893959
cds-WP_025432818.1	1		cds-WP_025432818.1	1		cds-WP_005248154.1	0.770776		cds-WP_025432818.1	1		cds-WP_025432473.1	0.615076		cds-WP_226955676.1	0.489304		cds-WP_005245036.1	0.893919
cds-WP_025432823.1	1		cds-WP_025432823.1	1		cds-WP_005244078.1	0.770705		cds-WP_025432823.1	1		cds-WP_025432521.1	0.615076		cds-WP_005244337.1	0.4893		cds-WP_005249040.1	0.893886
cds-WP_025432827.1	1		cds-WP_025432827.1	1		cds-WP_005252461.1	0.770608		cds-WP_025432827.1	1		cds-WP_025432524.1	0.615076		cds-WP_005247571.1	0.489049		cds-WP_007295767.1	0.893862
cds-WP_025432836.1	1		cds-WP_025432836.1	1		cds-WP_025433219.1	0.770489		cds-WP_025432836.1	1		cds-WP_025432529.1	0.615076		cds-WP_005243103.1	0.488887		cds-WP_025433594.1	0.893831
cds-WP_025432843.1	1		cds-WP_025432843.1	1		cds-WP_005252259.1	0.770435		cds-WP_025432843.1	1		cds-WP_025432533.1	0.615076		cds-WP_228380631.1	0.488826		cds-WP_025432401.1	0.893761
cds-WP_025432845.1	1		cds-WP_025432845.1	1		cds-WP_025432817.1	0.770428		cds-WP_025432845.1	1		cds-WP_025432537.1	0.615076		cds-WP_005251738.1	0.488571		cds-WP_005238508.1	0.893709
cds-WP_025432850.1	1		cds-WP_025432850.1	1		cds-WP_005243640.1	0.770415		cds-WP_025432850.1	1		cds-WP_025432544.1	0.615076		cds-WP_025431761.1	0.488524		cds-WP_025432955.1	0.893602
cds-WP_025432853.1	1		cds-WP_025432853.1	1		cds-WP_025432565.1	0.770082		cds-WP_025432853.1	1		cds-WP_025432545.1	0.615076		cds-WP_005238872.1	0.48849		cds-WP_005244230.1	0.893597
cds-WP_025432864.1	1		cds-WP_025432864.1	1		cds-WP_005247654.1	0.770082		cds-WP_025432864.1	1		cds-WP_025432553.1	0.615076		cds-WP_005243899.1	0.488489		cds-WP_005248121.1	0.893586
cds-WP_025432868.1	1		cds-WP_025432868.1	1		cds-WP_005244704.1	0.769998		cds-WP_025432868.1	1		cds-WP_025432554.1	0.615076		cds-WP_005248139.1	0.488364		cds-WP_025432878.1	0.893496
cds-WP_025432872.1	1		cds-WP_025432872.1	1		cds-WP_005247669.1	0.769909		cds-WP_025432872.1	1		cds-WP_025432555.1	0.615076		cds-WP_005251331.1	0.488217		cds-WP_037182754.1	0.893429
cds-WP_025432878.1	1		cds-WP_025432878.1	1		cds-WP_005251210.1	0.76981		cds-WP_025432878.1	1		cds-WP_025432570.1	0.615076		cds-WP_005240102.1	0.488176		cds-WP_037179308.1	0.893342
cds-WP_025432879.1	1		cds-WP_025432879.1	1		cds-WP_005240284.1	0.769782		cds-WP_025432879.1	1		cds-WP_025432581.1	0.615076		cds-WP_005248868.1	0.487769		cds-K2Z90_RS13635	0.893338
cds-WP_025432880.1	1		cds-WP_025432880.1	1		cds-WP_005243901.1	0.76963		cds-WP_025432880.1	1		cds-WP_025432586.1	0.615076		cds-WP_005242826.1-2	0.487682		cds-WP_005261263.1	0.893304
cds-WP_025432881.1	1		cds-WP_025432881.1	1		cds-WP_005250999.1	0.769603		cds-WP_025432881.1	1		cds-WP_025432605.1	0.615076		cds-WP_226955749.1	0.487658		cds-WP_025433212.1	0.893277
cds-WP_025432883.1	1		cds-WP_025432883.1	1		cds-WP_005251128.1	0.769466		cds-WP_025432883.1	1		cds-WP_025432609.1	0.615076		cds-WP_025432341.1	0.487555		cds-WP_005252945.1	0.893145
cds-WP_025432884.1	1		cds-WP_025432884.1	1		cds-WP_226955705.1	0.769295		cds-WP_025432884.1	1		cds-WP_025432626.1	0.615076		cds-WP_037182531.1	0.487497		cds-WP_005248494.1	0.893121
cds-WP_025432887.1	1		cds-WP_025432887.1	1		cds-WP_005250370.1	0.769043		cds-WP_025432887.1	1		cds-WP_025432640.1	0.615076		cds-WP_005242643.1	0.487486		cds-WP_025431577.1	0.892893
cds-WP_025432891.1	1		cds-WP_025432891.1	1		cds-WP_005261240.1	0.768939		cds-WP_025432891.1	1		cds-WP_025432642.1	0.615076		cds-WP_005244264.1	0.487486		cds-WP_005239499.1	0.892815
cds-WP_025432896.1	1		cds-WP_025432896.1	1		cds-WP_005239357.1	0.768899		cds-WP_025432896.1	1		cds-WP_025432649.1	0.615076		cds-WP_005244850.1	0.487486		cds-WP_025432923.1	0.892765
cds-WP_025432900.1	1		cds-WP_025432900.1	1		cds-WP_005240295.1	0.768783		cds-WP_025432900.1	1		cds-WP_025432677.1	0.615076		cds-WP_005240856.1	0.487407		cds-WP_025431616.1	0.892747
cds-WP_025432903.1	1		cds-WP_025432903.1	1		cds-WP_005239546.1	0.768764		cds-WP_025432903.1	1		cds-WP_025432678.1	0.615076		cds-WP_005251844.1	0.487271		cds-WP_025431649.1	0.892707
cds-WP_025432905.1	1		cds-WP_025432905.1	1		cds-WP_005247430.1	0.768746		cds-WP_025432905.1	1		cds-WP_025432717.1	0.615076		cds-WP_226955662.1	0.48725		cds-WP_005238929.1	0.892701
cds-WP_025432907.1	1		cds-WP_025432907.1	1		cds-WP_005240783.1	0.768644		cds-WP_025432907.1	1		cds-WP_025432786.1	0.615076		cds-WP_025433025.1	0.487163		cds-WP_005244719.1	0.892631
cds-WP_025432912.1	1		cds-WP_025432912.1	1		cds-WP_005238456.1	0.768512		cds-WP_025432912.1	1		cds-WP_025432794.1	0.615076		cds-WP_005248797.1	0.487144		cds-WP_025433007.1	0.892615
cds-WP_025432915.1	1		cds-WP_025432915.1	1		cds-WP_005254660.1	0.768501		cds-WP_025432915.1	1		cds-WP_025432812.1	0.615076		cds-WP_005249093.1	0.487107		cds-WP_005248221.1	0.892437
cds-WP_025432916.1	1		cds-WP_025432916.1	1		cds-WP_005244526.1	0.768359		cds-WP_025432916.1	1		cds-WP_025432816.1	0.615076		cds-WP_005252927.1	0.48698		cds-WP_025432347.1	0.892364
cds-WP_025432918.1	1		cds-WP_025432918.1	1		cds-WP_025431845.1	0.768273		cds-WP_025432918.1	1		cds-WP_025432818.1	0.615076		cds-WP_005238771.1	0.486911		cds-WP_005247916.1	0.892307
cds-WP_025432919.1	1		cds-WP_025432919.1	1		cds-WP_025431956.1	0.76817		cds-WP_025432919.1	1		cds-WP_025432821.1	0.615076		cds-WP_005255030.1	0.486822		cds-WP_005251384.1	0.892272
cds-WP_025432922.1	1		cds-WP_025432922.1	1		cds-WP_025432351.1	0.76802		cds-WP_025432922.1	1		cds-WP_025432822.1	0.615076		cds-WP_005246327.1	0.486821		cds-WP_005248804.1	0.892249
cds-WP_025432924.1	1		cds-WP_025432924.1	1		cds-WP_005241880.1	0.767981		cds-WP_025432924.1	1		cds-WP_025432823.1	0.615076		cds-WP_005244689.1	0.486698		cds-WP_025432929.1	0.892201
cds-WP_025432929.1	1		cds-WP_025432929.1	1		cds-WP_005247912.1	0.767967		cds-WP_025432929.1	1		cds-WP_025432824.1	0.615076		cds-WP_005251526.1	0.486484		cds-WP_264297250.1	0.892175
cds-WP_025432930.1	1		cds-WP_025432930.1	1		cds-WP_005250972.1	0.767777		cds-WP_025432930.1	1		cds-WP_025432827.1	0.615076		cds-WP_005247422.1	0.486471		cds-WP_025432176.1	0.892057
cds-WP_025432933.1	1		cds-WP_025432933.1	1		cds-WP_025432295.1	0.767667		cds-WP_025432933.1	1		cds-WP_025432836.1	0.615076		cds-WP_025431818.1	0.486456		cds-WP_005249088.1	0.891836
cds-WP_025432934.1	1		cds-WP_025432934.1	1		cds-WP_025432883.1	0.767495		cds-WP_025432934.1	1		cds-WP_025432839.1	0.615076		cds-WP_005568279.1	0.486276		cds-WP_005251426.1	0.891821
cds-WP_025432937.1	1		cds-WP_025432937.1	1		cds-WP_025432290.1	0.76745		cds-WP_025432937.1	1		cds-WP_025432845.1	0.615076		cds-WP_025433015.1	0.486221		cds-WP_005239833.1	0.891805
cds-WP_025432954.1	1		cds-WP_025432954.1	1		cds-WP_005237955.1	0.767323		cds-WP_025432954.1	1		cds-WP_025432847.1	0.615076		cds-WP_005248844.1	0.486075		cds-WP_025432832.1	0.891782
cds-WP_025432958.1	1		cds-WP_025432958.1	1		cds-WP_005252775.1	0.767237		cds-WP_025432958.1	1		cds-WP_025432850.1	0.615076		cds-WP_025432586.1	0.485793		cds-WP_005243853.1	0.891596
cds-WP_025432967.1	1		cds-WP_025432967.1	1		cds-WP_025432851.1	0.767201		cds-WP_025432967.1	1		cds-WP_025432851.1	0.615076		cds-WP_025431791.1	0.48569		cds-K2Z90_RS17950	0.891541
cds-WP_025432978.1	1		cds-WP_025432978.1	1		cds-WP_005252102.1	0.767159		cds-WP_025432978.1	1		cds-WP_025432853.1	0.615076		cds-WP_005251101.1	0.485637		cds-WP_025433186.1	0.891511
cds-WP_025432979.1	1		cds-WP_025432979.1	1		cds-WP_005251382.1	0.766984		cds-WP_025432979.1	1		cds-WP_025432858.1	0.615076		cds-WP_005259920.1	0.485226		cds-WP_005240361.1	0.891441
cds-WP_025432981.1	1		cds-WP_025432981.1	1		cds-WP_005251342.1	0.766937		cds-WP_025432981.1	1		cds-WP_025432864.1	0.615076		cds-WP_025431654.1	0.485199		cds-WP_005248766.1	0.891414
cds-WP_025432982.1	1		cds-WP_025432982.1	1		cds-WP_025432223.1	0.766801		cds-WP_025432982.1	1		cds-WP_025432868.1	0.615076		cds-WP_037179885.1	0.485178		cds-WP_025432554.1	0.891328
cds-WP_025432986.1	1		cds-WP_025432986.1	1		cds-WP_025432540.1	0.766751		cds-WP_025432986.1	1		cds-WP_025432872.1	0.615076		cds-WP_005244553.1	0.485113		cds-WP_005251070.1	0.89131
cds-WP_025432992.1	1		cds-WP_025432992.1	1		cds-WP_005239266.1	0.766523		cds-WP_025432992.1	1		cds-WP_025432875.1	0.615076		cds-WP_005239054.1	0.484666		cds-WP_005246276.1	0.891269
cds-WP_025433003.1	1		cds-WP_025433003.1	1		cds-WP_025432412.1	0.766422		cds-WP_025433003.1	1		cds-WP_025432876.1	0.615076		cds-WP_005240097.1	0.484554		cds-WP_005242153.1	0.891152
cds-WP_025433006.1	1		cds-WP_025433006.1	1		cds-WP_005263473.1	0.766378		cds-WP_025433006.1	1		cds-WP_025432878.1	0.615076		cds-WP_025433796.1	0.484468		cds-WP_005245256.1	0.891072
cds-WP_025433007.1	1		cds-WP_025433007.1	1		cds-WP_005244174.1	0.766188		cds-WP_025433007.1	1		cds-WP_025432879.1	0.615076		cds-WP_005249437.1	0.484352		cds-WP_005238579.1	0.89107
[truncated: 4,410 more rows]

## Sheet: S4
Names	total	elements
Correlation Gini index PCA SVM Uncertainty information gain information gain ratio	500	cds-WP_025432547.1
		cds-WP_005248114.1
		cds-WP_005248548.1
		cds-WP_005244000.1
		cds-WP_025433311.1
		cds-WP_005249088.1
		cds-WP_005243684.1
		cds-WP_005250797.1
		cds-WP_005252180.1
		cds-WP_025431638.1
		cds-WP_005248972.1
		cds-WP_037182685.1
		cds-WP_005250984.1
		cds-WP_005251928.1
		cds-WP_037179058.1
		cds-WP_005242371.1
		cds-WP_264297262.1
		cds-WP_009478066.1
		cds-WP_005253188.1
		cds-WP_005238748.1
		cds-WP_226955658.1
		cds-WP_025433161.1
		cds-WP_005247657.1
		cds-WP_005238869.1
		cds-K2Z90_RS22950
		cds-K2Z90_RS41800
		cds-WP_005248491.1
		cds-WP_005245035.1
		cds-WP_005242369.1
		cds-WP_005248329.1
		cds-WP_005238470.1
		cds-WP_005244674.1
		cds-WP_226955541.1
		cds-WP_005251230.1
		cds-WP_005240577.1
		cds-WP_005242751.1
		cds-WP_005250759.1
		cds-WP_005243822.1
		cds-WP_005246398.1
		cds-WP_080578158.1
		cds-WP_005248077.1
		cds-WP_005248869.1
		cds-WP_025432192.1
		cds-WP_005240246.1
		cds-WP_005242824.1
		cds-WP_005240740.1
		cds-WP_005242124.1
		cds-WP_005237854.1
		cds-WP_226955699.1
		cds-WP_005239823.1
		cds-WP_005244531.1
		cds-WP_025431565.1
		cds-WP_005242135.1
		cds-WP_005244590.1
		cds-WP_085990776.1
		cds-WP_005251379.1
		cds-WP_005239662.1
		cds-WP_025432570.1
		cds-WP_025432418.1
		cds-WP_005241311.1
		cds-WP_005239508.1
		cds-WP_005238876.1
		cds-WP_005248783.1
		cds-WP_025431816.1
		cds-WP_005238724.1
		cds-WP_005242355.1
		cds-WP_005247513.1
		cds-WP_005243155.1
		cds-WP_025432217.1
		cds-WP_005240383.1
		cds-WP_025432912.1
		cds-WP_005238704.1
		cds-WP_005242052.1
		cds-WP_005251984.1
		cds-WP_005250910.1
		cds-WP_005239253.1
		cds-WP_005252404.1
		cds-WP_005247567.1
		cds-WP_025433391.1
		cds-WP_005243810.1
		cds-WP_005243551.1
		cds-WP_005248111.1
		cds-WP_005238935.1
		cds-WP_005242367.1
		cds-WP_005250988.1
		cds-WP_025432165.1
		cds-WP_005240734.1
		cds-WP_005248464.1
		cds-WP_226955684.1
		cds-WP_005248124.1
		cds-WP_005248181.1
		cds-WP_025431634.1
		cds-WP_025432524.1
		cds-WP_005249135.1
		cds-WP_025433476.1
		cds-WP_005250991.1
		cds-WP_025431581.1
		cds-WP_005250550.1
		cds-WP_005239845.1
		cds-WP_005247842.1
		cds-WP_025431903.1
		cds-WP_005251244.1
		cds-WP_005239236.1
		cds-WP_061700978.1
		cds-WP_005252838.1
		cds-WP_226955781.1
		cds-WP_025432215.1
		cds-WP_005240048.1
		cds-WP_005248617.1
		cds-WP_005250007.1
		cds-WP_005248085.1
		cds-WP_005247891.1
		cds-WP_005240914.1
		cds-WP_025432557.1
		cds-WP_005239940.1
		cds-WP_005240572.1
		cds-WP_025433504.1
		cds-WP_005247642.1
		cds-WP_025431971.1
		cds-WP_043943777.1
		cds-WP_025431912.1
		cds-WP_037181684.1
		cds-WP_005240218.1
		cds-WP_025431997.1
		cds-WP_005246071.1
		cds-WP_025432392.1
		cds-WP_025432597.1
		cds-WP_025433299.1
		cds-WP_025432191.1
		cds-WP_005252000.1
		cds-WP_005240799.1
		cds-WP_005244016.1
		cds-WP_005252048.1
		cds-WP_226955497.1
		cds-WP_005251814.1
		cds-WP_005248900.1
		cds-WP_005246375.1
		cds-WP_025432111.1
		cds-WP_226955526.1
		cds-WP_005247637.1
		cds-WP_005240808.1
		cds-WP_005251383.1
		cds-WP_005252247.1
		cds-WP_005241678.1
		cds-WP_005263664.1
		cds-WP_005246128.1
		cds-WP_005251302.1
		cds-WP_005237840.1
		cds-WP_005242363.1
		cds-WP_005252945.1
		cds-WP_025432391.1
		cds-WP_005241721.1
		cds-WP_005244066.1
		cds-WP_005244063.1
		cds-WP_005242971.1
		cds-WP_025432915.1
		cds-WP_005238602.1
		cds-WP_005240064.1
		cds-WP_005246352.1
		cds-WP_025431767.1
		cds-WP_005252150.1
		cds-WP_005241787.1
		cds-WP_005252894.1
		cds-WP_005243187.1
		cds-WP_005238506.1
		cds-WP_005239658.1
		cds-WP_005242382.1
		cds-WP_005239567.1
		cds-WP_005249245.1
		cds-WP_005239003.1
		cds-WP_005240315.1
		cds-WP_005248847.1
		cds-WP_005252780.1
		cds-WP_005239102.1
		cds-WP_005255533.1
		cds-WP_005249106.1
		cds-WP_005238775.1
		cds-WP_025431739.1
		cds-WP_005238409.1
		cds-WP_005239513.1
		cds-WP_025431685.1
		cds-WP_005250848.1
		cds-WP_025433135.1
		cds-WP_005251573.1
		cds-WP_005237921.1
		cds-WP_005239478.1
		cds-WP_005241600.1
		cds-WP_005249255.1
		cds-WP_005251979.1
		cds-WP_005240533.1
		cds-WP_005239637.1
		cds-WP_009474169.1
		cds-WP_005252807.1
		cds-WP_005239439.1
		cds-WP_005244612.1
		cds-WP_085990781.1
		cds-WP_005251830.1
		cds-WP_025432298.1
		cds-WP_005252471.1
		cds-WP_005246185.1
		cds-WP_005245309.1
		cds-WP_005243807.1
		cds-WP_003936084.1
		cds-WP_005246296.1
		cds-WP_005237974.1
		cds-WP_005244696.1
		cds-WP_005251635.1
		cds-WP_005241784.1
		cds-WP_025432878.1
		cds-WP_005248838.1
		cds-WP_005242373.1
		cds-WP_037181850.1
		cds-WP_037179849.1
		cds-WP_005240110.1
		cds-WP_005248831.1
		cds-WP_005238528.1
		cds-WP_005243112.1
		cds-WP_005241810.1
		cds-WP_005238941.1
		cds-WP_005250068.1
		cds-WP_005241026.1
		cds-WP_080578276.1
		cds-WP_005252956.1
		cds-WP_005248818.1
		cds-WP_025433288.1
		cds-WP_005243881.1
		cds-WP_005252960.1
		cds-WP_005252901.1
		cds-WP_005252469.1
		cds-WP_005242722.1
		cds-WP_025433599.1
		cds-WP_005249211.1
		cds-WP_005240047.1
		cds-WP_025433125.1
		cds-WP_005251530.1
		cds-WP_226955547.1
		cds-WP_025432263.1
		cds-WP_005243954.1
		cds-WP_005243714.1
		cds-WP_005252380.1
		cds-WP_025432929.1
		cds-WP_226955596.1
		cds-WP_025431907.1
		cds-WP_025433639.1
		cds-WP_005238669.1
		cds-WP_005241270.1
		cds-WP_005239966.1
		cds-WP_025431800.1
		cds-WP_005249217.1
		cds-WP_005242937.1
		cds-WP_005240340.1
		cds-WP_005245031.1
		cds-WP_005573048.1
		cds-WP_005239563.1
		cds-WP_025432542.1
		cds-WP_005252443.1
		cds-WP_005239429.1
		cds-WP_005239314.1
		cds-K2Z90_RS12980
		cds-WP_005245026.1
		cds-WP_005240738.1
		cds-WP_005243645.1
		cds-WP_005250998.1
		cds-WP_007295767.1
		cds-WP_005254252.1
		cds-WP_005246678.1
		cds-WP_037179832.1
		cds-WP_005239511.1
		cds-WP_025432411.1
		cds-WP_005240606.1
		cds-WP_005246379.1
		cds-WP_005249959.1
		cds-WP_005243597.1
		cds-WP_005240868.1
		cds-WP_005252199.1
		cds-WP_005246311.1
		cds-WP_005242408.1
		cds-WP_005242359.1
		cds-WP_025432853.1
		cds-WP_025431940.1
		cds-WP_005251381.1
		cds-WP_005237953.1
		cds-WP_005243853.1
		cds-K2Z90_RS12370
		cds-WP_005239956.1
		cds-WP_005252231.1
		cds-WP_005252456.1
		cds-WP_005247738.1
		cds-WP_005239680.1
		cds-WP_005240336.1
		cds-WP_005239304.1
		cds-WP_080702728.1
		cds-WP_005242753.1
		cds-WP_005252732.1
		cds-WP_005248030.1
		cds-WP_025433105.1
		cds-WP_005250948.1
		cds-WP_025432063.1
		cds-WP_080578252.1
		cds-WP_005241821.1
		cds-WP_005252949.1
		cds-WP_005242172.1
		cds-WP_005251854.1
		cds-WP_005242362.1
		cds-WP_005243756.1
		cds-WP_025433054.1
		cds-WP_005247561.1
		cds-WP_005246650.1
		cds-WP_005238769.1
		cds-WP_005240494.1
		cds-WP_005237778.1
		cds-WP_005240987.1
		cds-WP_005240388.1
		cds-WP_016883983.1
		cds-WP_005243171.1
		cds-WP_005248772.1
		cds-WP_005260190.1
		cds-WP_005240849.1
		cds-WP_005249197.1
		cds-WP_005241813.1
		cds-WP_005240363.1
		cds-WP_005243989.1
		cds-WP_005248815.1
		cds-WP_005243605.1
		cds-WP_025433220.1
		cds-WP_005243092.1
		cds-WP_005244680.1
		cds-WP_226955727.1
		cds-WP_005247450.1
		cds-WP_005250799.1
		cds-WP_005239503.1
		cds-WP_005247630.1
		cds-WP_037179660.1
		cds-WP_005244413.1
		cds-WP_025432344.1
		cds-WP_025432227.1
		cds-WP_005240566.1
		cds-WP_005247484.1
		cds-WP_005248805.1
		cds-WP_037181550.1
		cds-WP_025431747.1
		cds-WP_005243820.1
		cds-WP_025433243.1
		cds-WP_005252872.1
		cds-WP_005246397.1
		cds-WP_005244377.1
		cds-WP_025431642.1
		cds-WP_005251734.1
		cds-WP_043943782.1
		cds-WP_025431633.1
		cds-WP_025431832.1
		cds-WP_005248776.1
		cds-WP_025432251.1
		cds-WP_005249180.1
		cds-WP_025432163.1
		cds-WP_003938068.1
		cds-WP_005250288.1
		cds-WP_226955672.1
		cds-WP_005249767.1
		cds-WP_005242388.1
		cds-WP_005247836.1
		cds-WP_005240833.1
		cds-WP_025432967.1
		cds-WP_005248925.1
		cds-WP_037179069.1
		cds-WP_179443189.1
		cds-WP_179443301.1
		cds-WP_005249254.1
		cds-WP_005251754.1
		cds-WP_005238665.1
		cds-WP_005240440.1
		cds-WP_005249320.1
		cds-WP_037181821.1
		cds-WP_005251056.1
		cds-WP_005247916.1
		cds-WP_005249137.1
		cds-WP_005249850.1
		cds-WP_005244877.1
		cds-WP_025431733.1
		cds-WP_025433009.1
		cds-WP_025432262.1
		cds-WP_005250030.1
		cds-WP_005252675.1
		cds-WP_025431942.1
		cds-WP_025432887.1
		cds-WP_025433156.1
		cds-WP_005248477.1
		cds-WP_005246086.1
		cds-WP_025432581.1
		cds-WP_005243754.1
		cds-WP_005247649.1
		cds-WP_025432850.1
		cds-WP_005247840.1
		cds-WP_005247973.1
		cds-WP_143767454.1
		cds-WP_005251059.1
		cds-WP_005252398.1
		cds-WP_005238131.1
		cds-WP_025432607.1
		cds-WP_005247951.1
		cds-WP_005240135.1
		cds-WP_025433088.1
		cds-WP_005240062.1
		cds-WP_005240103.1
		cds-WP_005252176.1
		cds-WP_005252018.1
		cds-WP_005239448.1
		cds-WP_005238566.1
		cds-WP_025432169.1
		cds-WP_025431999.1
		cds-WP_005247575.1
		cds-WP_005248582.1
		cds-WP_005563039.1
		cds-WP_025432554.1
		cds-WP_025431705.1
		cds-WP_005244831.1
		cds-WP_005244859.1
		cds-WP_005243718.1
		cds-WP_005246620.1
		cds-WP_005240760.1
		cds-WP_025432823.1
		cds-WP_005246502.1
		cds-WP_025432293.1
		cds-WP_005244344.1
		cds-WP_025433006.1
		cds-WP_005249620.1
		cds-WP_005248635.1
		cds-WP_005258203.1
		cds-WP_226955804.1
		cds-WP_005250777.1
		cds-WP_005239636.1
		cds-K2Z90_RS12350
		cds-WP_025432315.1
		cds-WP_005239499.1
		cds-WP_005247957.1
		cds-WP_025431775.1
		cds-WP_005252328.1
		cds-WP_005239500.1
		cds-WP_025432979.1
		cds-WP_005248810.1
		cds-WP_005247783.1
		cds-WP_005244617.1
		cds-WP_005237760.1
		cds-WP_005241386.1
		cds-WP_005241036.1
		cds-WP_005249677.1
		cds-WP_005252264.1
		cds-WP_005239443.1
		cds-WP_005244599.1
		cds-WP_005250071.1
		cds-WP_187300183.1
		cds-WP_005243204.1
		cds-WP_005246676.1
		cds-WP_005252787.1
		cds-WP_061044208.1
		cds-WP_005238598.1
		cds-WP_025432958.1
		cds-WP_164709609.1
		cds-WP_005243467.1
		cds-WP_005250036.1
		cds-WP_005238509.1
		cds-WP_025433516.1
		cds-WP_005251258.1
		cds-WP_005251609.1
		cds-WP_005238419.1
		cds-WP_005248218.1
		cds-WP_025431559.1
		cds-WP_005241006.1
		cds-WP_005241862.1
		cds-WP_005244387.1
		cds-WP_005244291.1
		cds-WP_005244873.1
		cds-WP_005252734.1
		cds-WP_005239745.1
		cds-WP_005245256.1
		cds-WP_005244097.1
		cds-WP_025431674.1
		cds-WP_025433557.1
		cds-WP_005243035.1
		cds-WP_005248217.1
		cds-WP_005246074.1
		cds-WP_005240992.1
		cds-WP_005238699.1
		cds-WP_025432813.1
		cds-WP_005252943.1
		cds-WP_005252783.1
		cds-WP_025433251.1
		cds-WP_005240001.1
		cds-WP_005260370.1
		cds-WP_005244451.1
		cds-WP_025432916.1
		cds-K2Z90_RS11630
		cds-WP_005239770.1
		cds-WP_061041700.1
		cds-WP_005248951.1
		cds-WP_005240853.1
		cds-WP_005239177.1
		cds-WP_005248516.1
		cds-WP_025433052.1
		cds-WP_003940820.1
Correlation Gini index PCA SVM information gain information gain ratio	83	cds-WP_025432934.1
		cds-WP_005244579.1
		cds-WP_005238317.1
		cds-WP_226955668.1
		cds-WP_025432992.1
		cds-WP_005248751.1
		cds-WP_005250930.1
		cds-WP_005247506.1
		cds-WP_005248525.1
		cds-WP_005248485.1
		cds-WP_025432398.1
		cds-WP_025431892.1
		cds-WP_005244704.1
		cds-WP_005249087.1
		cds-WP_025433250.1
		cds-WP_005247497.1
		cds-WP_005251233.1
		cds-WP_005250847.1
		cds-WP_025433262.1
		cds-WP_005247930.1
		cds-WP_005241207.1
		cds-WP_025431960.1
		cds-WP_005250999.1
		cds-WP_005243835.1
		cds-WP_005244970.1
		cds-WP_005240765.1
		cds-WP_005240286.1
		cds-WP_005243771.1
		cds-WP_005244099.1
		cds-WP_005247962.1
		cds-WP_025432213.1
		cds-WP_005244992.1
		cds-WP_005252863.1
		cds-WP_005244505.1
		cds-WP_005238920.1
		cds-WP_025432421.1
		cds-WP_005242384.1
		cds-WP_005239409.1
		cds-WP_025432247.1
		cds-WP_005244951.1
		cds-WP_005240701.1
		cds-WP_005243856.1
		cds-WP_005251300.1
		cds-WP_005252922.1
		cds-WP_005240786.1
		cds-WP_005250911.1
		cds-WP_025431964.1
		cds-WP_005250027.1
		cds-WP_025431877.1
		cds-WP_005252934.1
		cds-WP_005246078.1
		cds-WP_025433266.1
		cds-WP_005240983.1
		cds-WP_005250946.1
		cds-WP_005238973.1
		cds-WP_025432881.1
		cds-WP_005239852.1
		cds-WP_005243170.1
		cds-WP_005238863.1
		cds-WP_005242725.1
		cds-WP_025432336.1
		cds-WP_005249325.1
		cds-WP_005242495.1
		cds-WP_005240147.1
		cds-WP_005248116.1
		cds-WP_005244854.1
		cds-WP_037182611.1
		cds-WP_025433229.1
		cds-WP_025432598.1
		cds-WP_005250533.1
		cds-WP_005252792.1
		cds-WP_025432314.1
		cds-WP_005561362.1
		cds-WP_005239573.1
		cds-WP_005248897.1
		cds-WP_025432130.1
		cds-WP_179443392.1
		cds-WP_005238731.1
		cds-WP_005249207.1
		cds-WP_005238596.1
		cds-WP_005240781.1
		cds-WP_025431815.1
		cds-WP_005239302.1
Correlation Gini index PCA Uncertainty information gain information gain ratio	878	cds-WP_005244060.1
		cds-WP_005252376.1
		cds-WP_005247895.1
		cds-WP_005238367.1
		cds-WP_025432003.1
		cds-WP_025432090.1
		cds-WP_025432621.1
		cds-WP_005244305.1
		cds-WP_005240486.1
		cds-WP_025433186.1
		cds-WP_005251663.1
		cds-WP_005250038.1
		cds-WP_005250773.1
		cds-WP_025433089.1
		cds-WP_025433600.1
		cds-WP_005238780.1
		cds-WP_025432089.1
		cds-WP_025432000.1
		cds-WP_005240620.1
		cds-WP_025433090.1
		cds-WP_005244021.1
		cds-WP_025431584.1
		cds-WP_003402602.1
		cds-WP_005252172.1
		cds-WP_005244056.1
		cds-WP_005243826.1
		cds-WP_025431592.1
		cds-WP_005237782.1
		cds-WP_005242961.1
		cds-WP_226955678.1
		cds-WP_025431860.1
		cds-WP_005240632.1
		cds-WP_025432156.1
		cds-WP_005240583.1
		cds-WP_005244836.1
		cds-WP_226955540.1
		cds-WP_005238991.1
		cds-WP_005250861.1
		cds-WP_005244325.1
		cds-WP_226955679.1
		cds-WP_005252084.1
		cds-WP_025433165.1
		cds-WP_005243791.1
		cds-WP_005252296.1
		cds-WP_005239644.1
		cds-WP_005258384.1
		cds-WP_005244187.1
		cds-WP_005251408.1
		cds-WP_005246120.1
		cds-WP_005243010.1
		cds-WP_005243189.1
		cds-WP_005251647.1
		cds-WP_005248920.1
		cds-WP_005238894.1
		cds-WP_005251368.1
		cds-WP_005261100.1
		cds-K2Z90_RS19080
		cds-K2Z90_RS27905
		cds-WP_025432121.1
		cds-WP_037179308.1
		cds-WP_025432907.1
		cds-WP_005246496.1
		cds-WP_005244302.1
		cds-WP_037180746.1
		cds-WP_025431803.1
		cds-WP_025433622.1
		cds-WP_005244976.1
		cds-WP_005240272.1
		cds-WP_005248199.1
		cds-WP_005238650.1
		cds-WP_005251670.1
		cds-WP_005251969.1
		cds-WP_005247770.1
		cds-WP_025432933.1
		cds-WP_005240344.1
		cds-WP_025431994.1
		cds-WP_037183109.1
		cds-WP_025431917.1
		cds-WP_005252476.1
		cds-WP_005244982.1
		cds-WP_226955722.1
		cds-WP_005246309.1
		cds-WP_005251892.1
		cds-WP_005244312.1
		cds-WP_025433025.1
		cds-WP_005240761.1
		cds-WP_025433271.1
		cds-WP_005245521.1
		cds-WP_005238661.1
		cds-WP_005251105.1
		cds-WP_005250817.1
		cds-WP_005244105.1
		cds-WP_005251827.1
		cds-WP_011596917.1
		cds-WP_005248892.1
		cds-WP_005250843.1
		cds-WP_025432674.1
		cds-WP_005251269.1
		cds-WP_005251384.1
		cds-WP_025432884.1
		cds-WP_005244182.1
		cds-WP_005244922.1
		cds-WP_005238456.1
		cds-WP_231914249.1
		cds-WP_043943783.1
		cds-WP_005247511.1
		cds-WP_025431598.1
		cds-WP_005240903.1
		cds-WP_005250010.1
		cds-WP_005244094.1
		cds-WP_025432376.1
		cds-WP_005243126.1
		cds-WP_005238269.1
		cds-WP_025433189.1
		cds-WP_005241002.1
		cds-WP_025433174.1
		cds-WP_005239376.1
		cds-WP_005243692.1
		cds-WP_005259920.1
		cds-WP_005240414.1
		cds-WP_005241656.1
		cds-WP_025432642.1
		cds-WP_005244978.1
		cds-WP_005240325.1
		cds-WP_005238579.1
		cds-WP_005249093.1
		cds-WP_005251463.1
		cds-WP_005248152.1
		cds-WP_025431679.1
		cds-WP_005238794.1
		cds-WP_005238788.1
		cds-WP_025433265.1
		cds-WP_025433524.1
		cds-WP_005237933.1
		cds-WP_005248899.1
		cds-WP_005244926.1
		cds-WP_005243009.1
		cds-WP_025431945.1
		cds-WP_005246094.1
		cds-WP_005252249.1
		cds-WP_005240749.1
		cds-WP_166680705.1
		cds-WP_005244847.1
		cds-WP_005250840.1
		cds-WP_005244524.1
		cds-WP_005240901.1
		cds-WP_005252152.1
		cds-WP_005252291.1
		cds-WP_005252240.1
		cds-WP_005252920.1
		cds-WP_025432544.1
		cds-WP_025431913.1
		cds-WP_005252827.1
		cds-WP_005252752.1
		cds-WP_143767426.1
		cds-K2Z90_RS02765
		cds-WP_005237871.1
		cds-WP_005247625.1
		cds-WP_005251525.1
		cds-WP_005241863.1
		cds-WP_025433642.1
		cds-WP_005239831.1
		cds-WP_025432880.1
		cds-WP_005237785.1
		cds-WP_005239633.1
		cds-WP_005252927.1
		cds-WP_005251728.1
		cds-WP_025432978.1
		cds-WP_005248615.1
		cds-WP_005243124.1
		cds-WP_005250075.1
		cds-WP_005248500.1
		cds-WP_005242130.1
		cds-WP_005250970.1
		cds-WP_005242116.1
		cds-WP_005252077.1
		cds-WP_005249686.1
		cds-WP_025432395.1
		cds-WP_025433505.1
		cds-WP_005250389.1
		cds-WP_025433136.1
		cds-WP_005248784.1
		cds-WP_005249981.1
		cds-WP_005251543.1
		cds-K2Z90_RS23990
		cds-WP_005251366.1
		cds-WP_025433612.1
		cds-WP_005252423.1
		cds-WP_005239121.1
		cds-WP_005249052.1
		cds-WP_005244595.1
		cds-WP_037183006.1
		cds-WP_005251009.1
		cds-WP_005252737.1
		cds-WP_025433278.1
		cds-WP_005244721.1
		cds-WP_025431822.1
		cds-WP_005252571.1
		cds-WP_005252452.1
		cds-WP_025431644.1
		cds-WP_043943823.1
		cds-WP_264297250.1
		cds-WP_005246399.1
		cds-WP_005250094.1
		cds-WP_025432307.1
		cds-WP_005252784.1
		cds-WP_005246101.1
		cds-WP_025433302.1
		cds-WP_005239266.1
		cds-WP_025431724.1
		cds-WP_005240746.1
		cds-WP_005244070.1
		cds-WP_005244726.1
		cds-WP_005246070.1
		cds-WP_043943780.1
		cds-WP_005249271.1
		cds-WP_005238900.1
		cds-WP_005239818.1
		cds-WP_025432385.1
		cds-WP_143767543.1
		cds-WP_005244618.1
		cds-WP_005239585.1
		cds-WP_005239683.1
		cds-WP_025433192.1
		cds-WP_005244236.1
		cds-WP_005248622.1
		cds-WP_005251526.1
		cds-WP_005238864.1
		cds-WP_226955669.1
		cds-WP_005247772.1
		cds-WP_005243925.1
		cds-WP_005241348.1
		cds-WP_025432533.1
		cds-WP_005244883.1
		cds-WP_025433293.1
		cds-WP_226955721.1
		cds-WP_226955681.1
		cds-WP_005252536.1
		cds-WP_005248316.1
		cds-WP_005247472.1
		cds-WP_005248301.1
		cds-WP_025432903.1
		cds-WP_005240312.1
		cds-WP_005248889.1
		cds-WP_025431670.1
		cds-WP_005243722.1
		cds-WP_005237780.1
		cds-WP_005243958.1
		cds-WP_005249165.1
		cds-WP_005249785.1
		cds-WP_005247430.1
		cds-WP_025433317.1
		cds-WP_005251099.1
		cds-WP_005239077.1
		cds-WP_005238658.1
		cds-WP_005252542.1
		cds-WP_005246395.1
		cds-WP_005243986.1
		cds-WP_005247896.1
		cds-WP_005244837.1
		cds-WP_005240192.1
		cds-WP_005252457.1
		cds-WP_005237902.1
		cds-WP_025432223.1
		cds-WP_226955665.1
		cds-WP_005240904.1
		cds-WP_005250807.1
		cds-WP_005243861.1
		cds-WP_025431770.1
		cds-WP_005258779.1
		cds-WP_005243052.1
		cds-WP_025431845.1
		cds-WP_005238331.1
		cds-WP_005241413.1
		cds-WP_005250920.1
		cds-WP_005251248.1
		cds-WP_005262275.1
		cds-WP_005252069.1
		cds-WP_025431648.1
		cds-K2Z90_RS08195
		cds-WP_005251080.1
		cds-WP_005244135.1
		cds-WP_005241606.1
		cds-WP_005240884.1
		cds-WP_005252745.1
		cds-WP_005239471.1
		cds-K2Z90_RS15955
		cds-WP_005240598.1
		cds-WP_005248914.1
		cds-WP_037182782.1
		cds-WP_005252390.1
		cds-WP_005244863.1
		cds-WP_025433012.1
		cds-WP_005244174.1
		cds-WP_005249079.1
		cds-WP_226955536.1
		cds-WP_005238125.1
		cds-WP_025433246.1
		cds-WP_005249205.1
		cds-WP_025432600.1
		cds-WP_005244503.1
		cds-WP_005239455.1
		cds-WP_025432845.1
		cds-WP_037180845.1
		cds-WP_037179094.1
		cds-WP_226955687.1
		cds-WP_005240310.1
		cds-WP_005243623.1
		cds-WP_025431914.1
		cds-WP_005248928.1
		cds-WP_005244880.1
		cds-WP_005248844.1
		cds-WP_005248246.1
		cds-WP_005239548.1
		cds-WP_005237765.1
		cds-WP_025431694.1
		cds-WP_005250621.1
		cds-WP_005239990.1
		cds-WP_005240640.1
		cds-WP_005261420.1
		cds-WP_005246276.1
		cds-WP_025431934.1
		cds-WP_005244568.1
		cds-WP_025432159.1
		cds-WP_005243729.1
		cds-WP_025433007.1
		cds-WP_005244518.1
		cds-WP_025433060.1
		cds-WP_025433073.1
		cds-WP_005244194.1
		cds-WP_025432189.1
		cds-WP_226955656.1
		cds-WP_005252825.1
		cds-WP_005240589.1
		cds-WP_037181792.1
		cds-WP_005240767.1
		cds-WP_005252400.1
		cds-WP_005249734.1
		cds-WP_005238792.1
		cds-WP_005247363.1
		cds-WP_009474702.1
		cds-WP_005252368.1
		cds-WP_005244846.1
		cds-WP_005252385.1
		cds-WP_005239632.1
		cds-WP_005241367.1
		cds-WP_005237946.1
		cds-WP_005244912.1
		cds-WP_037179842.1
		cds-WP_005244337.1
		cds-WP_005246327.1
		cds-WP_005244798.1
		cds-WP_005252275.1
		cds-WP_025433184.1
		cds-WP_005249725.1
		cds-WP_005238803.1
		cds-WP_005251128.1
		cds-WP_005239544.1
		cds-WP_005252461.1
		cds-WP_025433179.1
		cds-WP_005243931.1
		cds-WP_025432919.1
		cds-WP_025432473.1
		cds-WP_005244787.1
		cds-WP_005238995.1
		cds-WP_037182698.1
		cds-WP_005237826.1
		cds-WP_005249605.1
		cds-WP_025432864.1
		cds-WP_005248607.1
		cds-WP_005247566.1
		cds-WP_005250760.1
		cds-WP_037179138.1
		cds-WP_005251372.1
		cds-WP_025433329.1
		cds-WP_005248937.1
		cds-WP_025433014.1
		cds-WP_005251584.1
		cds-WP_005243473.1
		cds-WP_005238854.1
		cds-WP_005250990.1
		cds-WP_005248168.1
		cds-WP_025433274.1
		cds-WP_005239930.1
		cds-WP_005239501.1
		cds-WP_005249200.1
		cds-WP_005242974.1
		cds-WP_005237791.1
		cds-WP_005241881.1
		cds-WP_005248484.1
		cds-WP_005244083.1
		cds-WP_005240969.1
		cds-WP_025431600.1
		cds-WP_005238454.1
		cds-WP_005251693.1
		cds-WP_043943825.1
		cds-WP_025433393.1
		cds-WP_005252532.1
		cds-WP_226955519.1
		cds-WP_005251689.1
		cds-WP_005248777.1
		cds-WP_005248872.1
		cds-WP_043943921.1
		cds-WP_005244691.1
		cds-WP_005244206.1
		cds-WP_025432836.1
		cds-WP_005244250.1
		cds-WP_005240878.1
		cds-WP_025433074.1
		cds-WP_005251375.1
		cds-WP_005238424.1
		cds-WP_025431744.1
		cds-WP_005242938.1
		cds-WP_005238286.1
		cds-WP_005248636.1
		cds-WP_005242798.1
		cds-WP_025432525.1
		cds-WP_005244204.1
		cds-WP_005244012.1
		cds-WP_005249842.1
		cds-WP_025432337.1
		cds-WP_005248579.1
		cds-WP_005250127.1
		cds-WP_005237940.1
		cds-WP_005248850.1
		cds-WP_005250455.1
		cds-WP_005250017.1
		cds-WP_226955700.1
		cds-WP_005240205.1
		cds-WP_005247527.1
		cds-WP_025432981.1
		cds-WP_005239642.1
		cds-WP_025433106.1
		cds-WP_005568279.1
		cds-WP_025431609.1
		cds-WP_025431663.1
		cds-WP_005252757.1
		cds-WP_005239504.1
		cds-WP_025432064.1
		cds-WP_005252530.1
		cds-WP_005250809.1
		cds-WP_025433082.1
		cds-WP_025431779.1
		cds-WP_025431970.1
		cds-WP_226955728.1
		cds-WP_005244857.1
		cds-WP_005248237.1
		cds-WP_005244240.1
		cds-WP_005251661.1
		cds-WP_005248141.1
		cds-WP_025431926.1
		cds-WP_005261263.1
		cds-WP_005248804.1
		cds-WP_005238898.1
		cds-WP_005251402.1
		cds-WP_005238960.1
		cds-WP_025432872.1
		cds-WP_005243991.1
		cds-WP_005241412.1
		cds-WP_005238605.1
		cds-WP_025433249.1
		cds-WP_005263480.1
		cds-WP_005256282.1
		cds-WP_025431612.1
		cds-WP_061698035.1
		cds-WP_005238844.1
		cds-WP_005259666.1
		cds-WP_025433137.1
		cds-WP_005251856.1
		cds-WP_005249076.1
		cds-WP_005237789.1
		cds-WP_025432260.1
		cds-WP_025431578.1
		cds-WP_005240670.1
		cds-WP_005244101.1
		cds-WP_005240744.1
		cds-WP_025431890.1
		cds-WP_037179080.1
		cds-WP_005238418.1
		cds-WP_025431961.1
		cds-WP_025432954.1
		cds-WP_005244592.1
		cds-WP_005251967.1
		cds-WP_025433300.1
		cds-WP_226955717.1
		cds-WP_005244430.1
		cds-WP_025431558.1
		cds-WP_005251065.1
		cds-WP_005251023.1
		cds-WP_025432101.1
		cds-WP_005247710.1
		cds-WP_005238840.1
		cds-WP_005251685.1
		cds-WP_005243149.1
		cds-WP_005247958.1
		cds-WP_005246233.1
		cds-WP_005243110.1
		cds-WP_005250868.1
		cds-WP_005248938.1
		cds-WP_005238508.1
		cds-WP_005570063.1
		cds-WP_005246430.1
		cds-WP_025432197.1
		cds-WP_005240596.1
		cds-WP_025431984.1
		cds-WP_005243086.1
		cds-WP_025432531.1
		cds-WP_025432145.1
		cds-WP_005251971.1
		cds-WP_025432545.1
		cds-WP_025431586.1
		cds-WP_025433091.1
		cds-WP_005242982.1
		cds-WP_005248947.1
		cds-WP_005259626.1
		cds-WP_005248821.1
		cds-WP_005245019.1
		cds-WP_005251825.1
		cds-WP_005243885.1
		cds-WP_005250367.1
		cds-WP_005241880.1
		cds-WP_025432346.1
		cds-WP_025431983.1
		cds-WP_005251935.1
		cds-WP_005248606.1
		cds-WP_005247587.1
		cds-WP_005244180.1
		cds-WP_005244214.1
		cds-WP_005238108.1
		cds-WP_005251986.1
		cds-WP_005252061.1
		cds-WP_005240828.1
		cds-WP_005247855.1
		cds-WP_005240626.1
		cds-WP_005250966.1
		cds-WP_005252012.1
		cds-WP_226955771.1
		cds-WP_005244790.1
		cds-WP_005239384.1
		cds-WP_005564952.1
		cds-WP_005243054.1
		cds-WP_005242149.1
		cds-WP_005238363.1
		cds-WP_005244415.1
		cds-WP_005244003.1
		cds-WP_005237923.1
		cds-WP_005252900.1
		cds-WP_005262890.1
		cds-WP_005252403.1
		cds-WP_025433323.1
		cds-WP_005244373.1
		cds-WP_005247765.1
		cds-WP_005247571.1
		cds-WP_005251362.1
		cds-WP_025432173.1
		cds-WP_005238613.1
		cds-WP_005244882.1
		cds-WP_037178950.1
		cds-WP_005248911.1
		cds-WP_005247382.1
		cds-WP_005259110.1
		cds-WP_005244025.1
		cds-WP_025433079.1
		cds-WP_025433381.1
		cds-WP_025432794.1
		cds-WP_005239502.1
		cds-WP_025431881.1
		cds-WP_005252137.1
		cds-WP_025433404.1
		cds-WP_037179001.1
		cds-WP_005247482.1
		cds-WP_005262018.1
		cds-WP_226955772.1
		cds-WP_005255234.1
		cds-WP_005238947.1
		cds-WP_003418601.1
		cds-WP_025433397.1
		cds-WP_005243492.1
		cds-WP_025432153.1
		cds-WP_005252344.1
		cds-WP_005243696.1
		cds-WP_025433268.1
		cds-WP_005249071.1
		cds-WP_025432093.1
		cds-WP_005244586.1
		cds-WP_025433066.1
		cds-WP_005252524.1
		cds-WP_005249980.1
		cds-WP_005252033.1
		cds-WP_005244140.1
		cds-WP_005252902.1
		cds-WP_005239891.1
		cds-WP_005573961.1
		cds-WP_005248626.1
		cds-WP_005243585.1
		cds-WP_005241711.1
		cds-WP_025431577.1
		cds-WP_005252672.1
		cds-WP_005252438.1
		cds-WP_005244010.1
		cds-WP_025433426.1
		cds-WP_005252671.1
		cds-K2Z90_RS04865
		cds-WP_025432237.1
		cds-WP_005247785.1
		cds-WP_005251571.1
		cds-WP_005244088.1
		cds-WP_264297273.1
		cds-WP_005262316.1
		cds-WP_005261289.1
		cds-WP_025433237.1
		cds-WP_005240106.1
		cds-WP_005244878.1
		cds-WP_005246087.1
		cds-WP_005238543.1
		cds-WP_025433051.1
		cds-WP_025431564.1
		cds-WP_005240266.1
		cds-WP_025432818.1
		cds-WP_025432158.1
		cds-WP_005248501.1
		cds-WP_005252134.1
		cds-WP_005240402.1
		cds-WP_005244443.1
		cds-WP_005249110.1
		cds-WP_005247978.1
		cds-WP_025431862.1
		cds-WP_005244598.1
		cds-WP_005251338.1
		cds-WP_025431738.1
		cds-WP_005239719.1
		cds-WP_005249840.1
		cds-WP_025431941.1
		cds-WP_005244894.1
		cds-WP_005248868.1
		cds-WP_005252021.1
		cds-WP_025432281.1
		cds-WP_025431615.1
		cds-WP_005243927.1
		cds-WP_005251588.1
		cds-WP_005248166.1
		cds-WP_025433003.1
		cds-WP_005244576.1
		cds-WP_005242958.1
		cds-WP_025431867.1
		cds-WP_005245014.1
		cds-WP_005238847.1
		cds-WP_037179365.1
		cds-WP_005244614.1
		cds-WP_005240710.1
		cds-WP_025433015.1
		cds-WP_264297285.1
		cds-WP_005252133.1
		cds-WP_226955606.1
		cds-WP_005247733.1
		cds-WP_005245011.1
		cds-WP_005250985.1
		cds-WP_005251046.1
		cds-WP_025432555.1
		cds-WP_005252377.1
		cds-WP_005249967.1
		cds-WP_005240319.1
		cds-WP_005252860.1
		cds-WP_005247983.1
		cds-WP_005246211.1
		cds-WP_005239397.1
		cds-WP_025433164.1
		cds-WP_005238107.1
		cds-WP_005242145.1
		cds-WP_005240102.1
		cds-WP_005237978.1
		cds-WP_025433598.1
		cds-WP_005238398.1
		cds-WP_005238592.1
		cds-WP_005252942.1
		cds-WP_037182762.1
		cds-WP_005251473.1
		cds-WP_025433129.1
		cds-K2Z90_RS15425
		cds-WP_005248935.1
		cds-WP_005260882.1
		cds-WP_005251540.1
		cds-WP_005240338.1
		cds-WP_005240725.1
		cds-WP_264297251.1
		cds-WP_025432879.1
		cds-WP_005244735.1
		cds-WP_025432341.1
		cds-WP_005244957.1
		cds-WP_005250413.1
		cds-WP_005244733.1
		cds-WP_005239244.1
		cds-WP_005241841.1
		cds-WP_025431792.1
		cds-WP_005252154.1
		cds-WP_005249629.1
		cds-WP_005243643.1
		cds-WP_005242967.1
		cds-WP_005238656.1
		cds-WP_005239964.1
		cds-WP_005251724.1
		cds-WP_025431777.1
		cds-WP_025432149.1
		cds-WP_005244553.1
		cds-WP_037182869.1
		cds-WP_025433525.1
		cds-WP_005238845.1
		cds-WP_005242845.1
		cds-WP_005239639.1
		cds-WP_005252958.1
		cds-WP_005573403.1
		cds-WP_005238441.1
		cds-WP_025433284.1
		cds-WP_005238294.1
		cds-WP_025432626.1
		cds-WP_005243040.1
		cds-WP_025432924.1
		cds-WP_005243649.1
		cds-WP_005237924.1
		cds-WP_005248827.1
		cds-WP_005239064.1
		cds-WP_187300153.1
		cds-WP_025433239.1
		cds-WP_005252374.1
		cds-WP_005246065.1
		cds-WP_005248861.1
		cds-WP_005251853.1
		cds-WP_005257351.1
		cds-WP_005252937.1
		cds-WP_005243071.1
		cds-WP_005251047.1
		cds-WP_005238789.1
		cds-WP_025431947.1
		cds-WP_005240899.1
		cds-WP_005252194.1
		cds-WP_226955709.1
		cds-WP_005243533.1
		cds-WP_005246353.1
		cds-K2Z90_RS31845
		cds-WP_005239657.1
		cds-WP_025433139.1
		cds-WP_005251699.1
		cds-WP_005248139.1
		cds-WP_005251654.1
		cds-WP_005246612.1
		cds-WP_025431921.1
		cds-WP_005248601.1
		cds-WP_005239017.1
		cds-WP_025433141.1
		cds-WP_025433318.1
		cds-WP_005251189.1
		cds-WP_005243022.1
		cds-WP_005258295.1
		cds-WP_005250076.1
		cds-WP_005240232.1
		cds-WP_005237955.1
		cds-WP_005246240.1
		cds-WP_037179885.1
		cds-WP_005248040.1
		cds-WP_005248663.1
		cds-WP_005240630.1
		cds-WP_005249213.1
		cds-WP_005252073.1
		cds-WP_005244308.1
		cds-WP_005250019.1
		cds-WP_005240049.1
		cds-WP_005240282.1
		cds-WP_005247177.1
		cds-WP_005238685.1
		cds-WP_264297272.1
		cds-WP_005243963.1
		cds-WP_005243144.1
		cds-WP_005245010.1
		cds-WP_005250992.1
		cds-WP_005240222.1
		cds-WP_005248208.1
		cds-WP_005247281.1
		cds-WP_005238766.1
		cds-WP_005243056.1
		cds-WP_005244133.1
		cds-WP_005252578.1
		cds-WP_025432236.1
		cds-WP_025431594.1
		cds-WP_005238721.1
		cds-WP_025431743.1
		cds-WP_005247843.1
		cds-WP_025433053.1
		cds-WP_005244840.1
		cds-WP_025432152.1
		cds-WP_025432285.1
		cds-WP_005248330.1
		cds-WP_005244040.1
		cds-WP_005248630.1
		cds-WP_025431682.1
		cds-WP_005240427.1
		cds-WP_005247479.1
		cds-WP_005238133.1
		cds-WP_005237808.1
		cds-WP_005240748.1
		cds-WP_005244907.1
		cds-WP_025431636.1
		cds-WP_005243767.1
		cds-WP_005252702.1
		cds-WP_005241608.1
		cds-WP_005248923.1
		cds-WP_005250003.1
		cds-WP_005239412.1
		cds-WP_005244014.1
		cds-WP_005251522.1
		cds-WP_025431649.1
		cds-WP_005238588.1
		cds-WP_005247937.1
		cds-WP_037182604.1
		cds-WP_005244825.1
		cds-WP_025432918.1
		cds-WP_005250971.1
		cds-WP_025433212.1
		cds-WP_226955523.1
		cds-WP_025432151.1
		cds-WP_005250766.1
		cds-WP_005237864.1
		cds-WP_005251155.1
		cds-WP_005243104.1
		cds-WP_005244981.1
		cds-WP_226955662.1
		cds-WP_005248745.1
		cds-WP_025431580.1
		cds-WP_005252847.1
		cds-WP_005251156.1
		cds-WP_005250964.1
		cds-WP_005240442.1
		cds-WP_005248057.1
		cds-WP_025432206.1
		cds-WP_005240726.1
		cds-WP_005244608.1
		cds-WP_005238834.1
		cds-WP_025432405.1
		cds-WP_005246654.1
		cds-WP_005243158.1
		cds-WP_025431835.1
		cds-WP_005243130.1
		cds-WP_025432868.1
		cds-WP_005244162.1
		cds-WP_005243157.1
		cds-WP_005248746.1
		cds-WP_025432308.1
		cds-WP_005240114.1
		cds-WP_025433515.1
		cds-WP_005247359.1
		cds-WP_005240152.1
		cds-WP_005252774.1
		cds-WP_005247861.1
		cds-WP_005237770.1
		cds-WP_005243633.1
		cds-WP_005244098.1
		cds-WP_005251101.1
		cds-WP_025433235.1
		cds-K2Z90_RS12205
		cds-WP_025432363.1
		cds-WP_025432905.1
		cds-WP_005250559.1
		cds-WP_005252427.1
		cds-WP_226955685.1
		cds-WP_005248631.1
		cds-WP_007300914.1
		cds-WP_005248641.1
		cds-WP_005252355.1
		cds-WP_025433069.1
		cds-WP_005243625.1
		cds-WP_005237942.1
		cds-WP_025431817.1
		cds-WP_005250032.1
		cds-WP_005241654.1
		cds-WP_005251428.1
		cds-WP_005238944.1
		cds-WP_005238903.1
		cds-WP_005240097.1
		cds-WP_025431836.1
Correlation Gini index SVM Uncertainty information gain information gain ratio	69	cds-WP_005238055.1
		cds-WP_005238747.1
		cds-WP_005249167.1
		cds-WP_005244942.1
		cds-WP_005248975.1
		cds-WP_005249241.1
		cds-WP_005239667.1
		cds-WP_005251205.1
		cds-WP_037183206.1
		cds-WP_025431734.1
		cds-WP_005239634.1
		cds-WP_005239684.1
		cds-WP_005247669.1
		cds-WP_005252514.1
		cds-WP_005238136.1
		cds-WP_005240214.1
		cds-WP_005238781.1
		cds-WP_037181763.1
		cds-WP_005252299.1
[truncated: 3,607 more rows]
